# Supplementary material
Source: publisher figshare collection journal article supplement (https://geolsoc.figshare.com/ndownloader/files/13548455)
Supplement: Supplementary file 1 [file 13548455]

## Sheet: J1
Table S5a. U-Pb geochronologic analyses.				JH16-J1
							Isotope ratios						Apparent ages (Ma)
Analysis	U	206Pb	U/Th	206Pb*	±	207Pb*	±	206Pb*	±	error	206Pb*	±	207Pb*	±	206Pb*	±	Best age	±	Conc
	(ppm)	204Pb		207Pb*	(%)	235U*	(%)	238U	(%)	corr.	238U*	(Ma)	235U	(Ma)	207Pb*	(Ma)	(Ma)	(Ma)	(%)
JH16J1-Spot 206	705.217	88205.6	2.24966	19.3937	0.915318	0.117608	2.93034	0.0165495	2.01502	0.910469	105.812	2.11473	112.901	3.1311	266.084	20.9802	105.812	2.11473	NA
JH16J1-Spot 123	909.452	29419.7	1.45875	20.001	1.14262	0.114141	3.37872	0.0165646	2.2361	0.89048	105.907	2.34885	109.746	3.51466	194.898	26.5601	105.907	2.34885	NA
JH16J1-Spot 77	700.669	20114	1.62476	20.6223	1.02508	0.113465	3.33443	0.016978	2.30935	0.914002	108.528	2.48532	109.13	3.45016	123.283	24.1399	108.528	2.48532	NA
JH16J1-Spot 229	662.123	31713.6	2.40997	20.7592	1.15296	0.112893	3.5143	0.0170046	2.36134	0.898605	108.697	2.54519	108.609	3.61981	107.717	27.2442	108.697	2.54519	NA
JH16J1-Spot 46	850.926	99804.2	1.42103	20.5134	1.11571	0.115042	3.8892	0.017123	2.77349	0.927746	109.448	3.0099	110.567	4.07434	135.754	26.2292	109.448	3.0099	NA
JH16J1-Spot 76	126.319	21943.3	0.575814	20.1945	1.91832	0.117818	4.30488	0.0172637	2.38656	0.77942	110.339	2.61089	113.092	4.60717	172.426	44.7628	110.339	2.61089	NA
JH16J1-Spot 94	407.717	44283.3	3.50502	20.6331	1.12558	0.115486	3.52731	0.0172895	2.40173	0.905493	110.503	2.63136	110.971	3.70801	122.065	26.5168	110.503	2.63136	NA
JH16J1-Spot 83	479.361	272441	2.53893	20.5523	1.05663	0.11596	3.3039	0.0172924	2.24726	0.904959	110.521	2.46254	111.403	3.48592	131.29	24.8573	110.521	2.46254	NA
JH16J1-Spot 168	370.408	49951.1	3.42003	19.3361	1.46661	0.123394	3.5733	0.017312	2.10669	0.820707	110.646	2.31107	118.144	3.98531	272.889	33.6092	110.646	2.31107	NA
JH16J1-Spot 27	454.494	19003.5	2.48124	20.2224	1.10693	0.118205	3.50811	0.0173442	2.40118	0.908148	110.849	2.63895	113.443	3.76547	169.211	25.8665	110.849	2.63895	NA
JH16J1-Spot 188	116.972	7527.55	1.45064	21.646	2.34689	0.110772	5.04599	0.0173979	2.6991	0.754627	111.19	2.97538	106.672	5.10959	7.93793	56.4901	111.19	2.97538	NA
JH16J1-Spot 132	159.816	5177.3	1.09722	21.4381	3.64025	0.112133	6.03662	0.0174425	2.39637	0.549852	111.472	2.64833	107.915	6.18027	31.1253	87.2539	111.472	2.64833	NA
JH16J1-Spot 222	717.307	135764	2.90825	20.5811	1.13379	0.117137	3.79126	0.0174925	2.65747	0.919787	111.789	2.94514	112.473	4.03649	128.032	26.7037	111.789	2.94514	NA
JH16J1-Spot 148	240.808	73844.5	3.08338	19.9795	1.32638	0.121295	3.88131	0.0175839	2.55493	0.887527	112.368	2.84604	116.245	4.26317	197.353	30.8344	112.368	2.84604	NA
JH16J1-Spot 44	657.53	41873.1	7.45355	20.704	1.30675	0.117388	3.78889	0.0176347	2.48213	0.884864	112.69	2.77281	112.702	4.04171	113.988	30.832	112.69	2.77281	NA
JH16J1-Spot 192	75.1603	24989.6	0.724149	20.7022	2.03845	0.117568	4.89316	0.0176601	2.85471	0.813818	112.851	3.19353	112.865	5.22683	114.198	48.0855	112.851	3.19353	NA
JH16J1-Spot 271	138.136	20804.3	2.26461	19.6463	1.71213	0.123972	4.55934	0.0176723	2.8472	0.856987	112.928	3.1873	118.667	5.10628	236.299	39.5005	112.928	3.1873	NA
JH16J1-Spot 69	901.686	34425.9	9.17211	20.6568	0.998704	0.118949	3.51175	0.0178284	2.51304	0.929305	113.917	2.83763	114.119	3.79059	119.387	23.5356	113.917	2.83763	NA
JH16J1-Spot 96	196.615	61495.1	1.80038	19.3324	1.49881	0.127289	4.21809	0.0178552	2.71928	0.875779	114.086	3.07504	121.659	4.83619	273.319	34.3481	114.086	3.07504	NA
JH16J1-Spot 3	250.745	17628.3	1.48428	20.5223	1.75495	0.121583	3.53726	0.0181044	1.78232	0.712557	115.665	2.04313	116.506	3.8935	134.738	41.2259	115.665	2.04313	NA
JH16J1-Spot 5	273.939	16510.6	1.29232	20.5105	1.41298	0.122136	3.72808	0.0181764	2.31511	0.853579	116.121	2.66425	117.007	4.12018	136.092	33.1833	116.121	2.66425	NA
JH16J1-Spot 166	798.672	223083	18.8767	20.6527	1.19753	0.122439	4.09639	0.0183478	2.89885	0.924241	117.206	3.36691	117.28	4.53722	119.825	28.222	117.206	3.36691	NA
JH16J1-Spot 267	413.94	55855.2	2.41947	19.9611	1.22001	0.227193	4.0455	0.0329055	2.82549	0.918073	208.707	5.80257	207.879	7.60488	199.49	28.3488	208.707	5.80257	NA
JH16J1-Spot 239	906.298	637990	1.46011	19.4232	0.919569	0.251966	2.93214	0.03551	2.01257	0.909554	224.941	4.44904	228.172	5.99197	262.617	21.1214	224.941	4.44904	NA
JH16J1-Spot 130	265.071	56535.8	1.13958	19.4874	1.15388	0.274925	3.56384	0.0388736	2.40995	0.901945	245.847	5.81325	246.624	7.80343	255.003	26.5471	245.847	5.81325	NA
JH16J1-Spot 220	362.768	163037	2.7725	19.6967	0.924328	0.285946	2.87529	0.0408663	1.95096	0.903704	258.201	4.93784	255.363	6.492	230.373	21.3691	258.201	4.93784	NA
JH16J1-Spot 223	596.637	101087	4.06926	17.4694	1.55402	0.339844	5.90944	0.0430771	4.35541	0.941843	271.878	11.5952	297.054	15.2207	500.926	34.2168	271.878	11.5952	NA
JH16J1-Spot 113	1806.38	11852.5	3.38097	13.6595	1.23633	0.485738	3.56329	0.048142	2.32696	0.883095	303.104	6.88987	402.002	11.8293	1019.73	25.0296	303.104	6.88987	NA
JH16J1-Spot 119	43.955	6646.01	1.14186	19.2173	1.51425	0.361901	4.03358	0.0504627	2.51933	0.857095	317.362	7.80178	313.633	10.8838	286.989	34.6163	317.362	7.80178	NA
JH16J1-Spot 187	259.833	24594	2.49427	18.9357	1.14018	0.399389	3.93923	0.0548739	2.79905	0.926113	344.375	9.3863	341.205	11.4161	320.675	25.9224	344.375	9.3863	NA
JH16J1-Spot 265	323.684	56621.5	1.80278	18.0091	1.23357	0.53378	4.02064	0.0697497	2.78706	0.914434	434.647	11.7146	434.315	14.2086	433.503	27.4792	434.647	11.7146	100.264
JH16J1-Spot 191	209.368	110956	1.26028	17.749	1.1874	0.548214	3.88052	0.0706012	2.69312	0.915011	439.777	11.4488	443.826	13.9529	465.852	26.3245	439.777	11.4488	94.4027
JH16J1-Spot 54	127.746	1.00117e+06	2.58265	17.7306	1.11235	0.556336	4.15617	0.071573	3.04382	0.939247	445.626	13.1058	449.139	15.0865	468.111	24.6329	445.626	13.1058	95.1966
JH16J1-Spot 214	104.012	51984.7	1.99487	17.6829	1.40019	0.561637	3.67442	0.0720603	2.27422	0.851546	448.557	9.85437	452.591	13.419	474.122	30.9831	448.557	9.85437	94.6078
JH16J1-Spot 208	824.947	333756	3.32205	17.486	1.13584	0.611005	4.12248	0.0775219	2.98663	0.934688	481.314	13.8516	484.194	15.8771	498.786	25.0182	481.314	13.8516	96.4971
JH16J1-Spot 161	66.691	38522.5	0.396728	16.8126	1.31732	0.67118	3.59425	0.0818767	2.27692	0.865573	507.315	11.1083	521.429	14.6583	584.705	28.575	507.315	11.1083	86.7642
JH16J1-Spot 218	76.7796	89354.3	0.672351	16.9554	1.24957	0.672863	3.3465	0.0827794	2.09693	0.859041	512.692	10.3344	522.452	13.6682	566.314	27.2301	512.692	10.3344	90.5314
JH16J1-Spot 125	295.432	328694	1.99629	17.1656	1.1008	0.666726	3.43138	0.0830414	2.33058	0.904212	514.251	11.5195	518.72	13.9383	539.38	24.0791	514.251	11.5195	95.3411
JH16J1-Spot 120	23.1189	4980.01	0.0237306	17.1925	2.28123	0.670675	5.05085	0.0836641	2.76962	0.77188	517.956	13.7843	521.123	20.5908	535.957	49.9538	517.956	13.7843	96.6414
JH16J1-Spot 12	896.855	232365	1.77501	17.0324	0.894641	0.678559	3.05826	0.0838592	2.16362	0.924115	519.117	10.7914	525.903	12.5539	556.42	19.4965	519.117	10.7914	93.2959
JH16J1-Spot 89	395.149	384192	13.6906	17.1591	1.00522	0.677092	3.0519	0.0843003	2.04668	0.897583	521.74	10.2576	525.015	12.5116	540.26	21.9856	521.74	10.2576	96.572
JH16J1-Spot 78	195.438	57519.4	0.905384	17.269	1.30506	0.675504	3.63865	0.0846414	2.33359	0.872785	523.767	11.7392	524.053	14.8965	526.275	28.6049	523.767	11.7392	99.5234
JH16J1-Spot 128	318.225	118538	1.07976	17.2366	1.14081	0.679679	3.96119	0.0850045	2.82038	0.927036	525.925	14.2442	526.58	16.2769	530.395	24.9834	525.925	14.2442	99.1572
JH16J1-Spot 147	139.539	191702	3.14133	16.8155	0.998195	0.704592	2.94311	0.0859678	1.94492	0.889669	531.646	9.92518	541.53	12.3531	584.282	21.6697	531.646	9.92518	90.9912
JH16J1-Spot 261	578.889	207719	13.8043	17.1079	0.884839	0.693576	2.89646	0.086095	2.01162	0.915361	532.401	10.2796	534.947	12.045	546.748	19.3308	532.401	10.2796	97.3759
JH16J1-Spot 47	32.0377	22431.8	0.862365	17.3912	1.58165	0.683166	4.19498	0.0862074	2.61332	0.855514	533.068	13.3704	528.686	17.2902	510.767	34.7757	533.068	13.3704	104.366
JH16J1-Spot 162	38.2175	15672.9	0.488489	17.1886	1.55962	0.692366	3.90513	0.0863504	2.3455	0.832713	533.917	12.0185	534.221	16.2235	536.452	34.1414	533.917	12.0185	99.5273
JH16J1-Spot 233	618.562	123319	3.56756	16.8896	1.03588	0.704988	3.17497	0.0863949	2.13909	0.900021	534.181	10.966	541.766	13.3308	574.765	22.5129	534.181	10.966	92.939
JH16J1-Spot 57	349.589	88267.9	269.178	16.9799	1.06048	0.707866	3.15604	0.0872113	2.09556	0.892255	539.023	10.8362	543.478	13.2829	563.133	23.1035	539.023	10.8362	95.7186
JH16J1-Spot 268	191.518	42814.9	0.978887	17.0905	1.07274	0.705771	3.30318	0.0875198	2.23043	0.901186	540.852	11.5712	542.232	13.8781	549.008	23.4372	540.852	11.5712	98.5145
JH16J1-Spot 221	112.636	123422	1.6087	17.0048	1.11983	0.711797	2.98728	0.0878244	1.86745	0.857622	542.658	9.71905	545.813	12.6134	559.952	24.39	542.658	9.71905	96.9115
JH16J1-Spot 11	364.648	333815	56.1888	16.9747	1.26772	0.715652	3.784	0.0881437	2.51628	0.893064	544.549	13.1396	548.097	16.0284	563.798	27.606	544.549	13.1396	96.5858
JH16J1-Spot 33	49.009	42322.2	0.960736	17.2878	1.41695	0.703317	3.56523	0.0882221	2.14829	0.834774	545.014	11.2272	540.77	14.9487	523.852	31.0666	545.014	11.2272	104.04
JH16J1-Spot 100	232.38	53500.9	2.55507	17.1943	1.11322	0.710958	3.65335	0.0886984	2.54013	0.915903	547.835	13.3408	545.315	15.4156	535.731	24.3546	547.835	13.3408	102.259
JH16J1-Spot 22	82.407	53037.1	0.602121	17.229	1.1891	0.722216	3.6913	0.0902851	2.5022	0.9032	557.223	13.3572	551.974	15.719	531.352	26.0408	557.223	13.3572	104.869
JH16J1-Spot 157	41.6346	15449.7	0.606364	16.6459	1.80697	0.751492	4.02223	0.0907652	2.21527	0.774903	560.061	11.8832	569.09	17.5249	606.253	39.0834	560.061	11.8832	92.3807
JH16J1-Spot 238	728.362	99498.7	4.11558	16.0616	0.998643	0.779736	2.95593	0.0908705	1.95728	0.890756	560.683	10.5105	585.333	13.1504	683.048	21.3262	560.683	10.5105	82.0856
JH16J1-Spot 108	446.698	221855	27.1088	16.9829	0.988917	0.741202	3.72098	0.0913346	2.73207	0.940297	563.425	14.7397	563.107	16.0846	562.748	21.5404	563.425	14.7397	100.12
JH16J1-Spot 28	677.051	293675	5.22791	16.7835	0.811818	0.755467	2.81089	0.0919996	1.99908	0.926516	567.352	10.857	571.392	12.2834	588.462	17.5923	567.352	10.857	96.4127
JH16J1-Spot 247	332.308	155878	7.03366	16.2875	0.974331	0.780391	3.1989	0.0922263	2.22457	0.915994	568.691	12.109	585.706	14.2382	653.181	20.9091	568.691	12.109	87.0648
JH16J1-Spot 254	61.0093	16004.6	2.00227	17.043	1.26962	0.747639	3.62867	0.0924542	2.35905	0.88057	570.035	12.87	566.854	15.7635	555.038	27.6856	570.035	12.87	102.702
JH16J1-Spot 150	613.15	154149	2.31317	16.7508	1.24466	0.762796	3.65871	0.0927111	2.41405	0.888815	571.551	13.2036	575.622	16.0768	592.649	26.9821	571.551	13.2036	96.4402
JH16J1-Spot 203	325.302	178169	0.41279	16.8727	1.1609	0.767636	3.27551	0.0939781	2.11461	0.876589	579.022	11.7103	578.406	14.4444	576.956	25.223	579.022	11.7103	100.358
JH16J1-Spot 99	24.7814	11828.6	0.737782	16.5784	1.89977	0.781488	4.45501	0.0940056	2.55524	0.802504	579.183	14.1542	586.332	19.846	615.029	41.0266	579.183	14.1542	94.1718
JH16J1-Spot 118	121.682	17169.3	1.07873	17.012	1.12442	0.763554	3.81887	0.0942504	2.69445	0.922867	580.626	14.9609	576.058	16.7902	559.051	24.5056	580.626	14.9609	103.859
JH16J1-Spot 52	72.0878	45854.9	1.3919	16.4847	1.29099	0.788376	3.60161	0.094298	2.31062	0.872982	580.906	12.8355	590.25	16.1227	627.26	27.8053	580.906	12.8355	92.6101
JH16J1-Spot 140	76.9907	28587.5	0.954931	16.4302	1.22356	0.79324	3.0241	0.0945663	1.80055	0.8271	582.486	10.0281	593.008	13.5837	634.431	26.352	582.486	10.0281	91.8125
JH16J1-Spot 67	275.192	1.04931e+06	53.8644	16.7294	0.945961	0.790498	3.93366	0.0959555	2.9877	0.953355	590.663	16.8629	591.455	17.6359	595.422	20.4908	590.663	16.8629	99.2007
JH16J1-Spot 269	98.3124	212919	1.30874	16.6475	1.15217	0.797381	3.7905	0.096317	2.63833	0.916425	592.789	14.9422	595.35	17.0763	606.041	24.933	592.789	14.9422	97.8133
JH16J1-Spot 133	42.0838	39316.2	0.92779	16.4466	1.38587	0.809589	3.53792	0.0966112	2.15205	0.840749	594.519	12.2221	602.223	16.0731	632.291	29.8457	594.519	12.2221	94.0261
JH16J1-Spot 97	330.171	38249.1	2.35786	15.9724	0.86181	0.849938	3.37324	0.0985019	2.51143	0.945859	605.624	14.5172	624.615	15.7377	694.948	18.3883	605.624	14.5172	87.1465
JH16J1-Spot 61	97.098	43709.1	0.8411	16.4555	1.32083	0.825155	3.40794	0.0985223	2.08712	0.845004	605.743	12.0668	610.92	15.6456	631.119	28.4519	605.743	12.0668	95.9792
JH16J1-Spot 71	74.3416	22072	1.65601	16.3371	1.44286	0.833323	3.5917	0.0987814	2.14884	0.83021	607.264	12.4534	615.454	16.5784	646.66	31.0075	607.264	12.4534	93.9078
JH16J1-Spot 82	70.7603	349493	0.967997	16.3838	1.41552	0.83191	3.46558	0.0988958	2.05006	0.822897	607.935	11.8934	614.672	15.9813	640.526	30.4418	607.935	11.8934	94.9118
JH16J1-Spot 98	157.424	338078	2.02552	16.4923	1.19945	0.830576	3.68115	0.0993916	2.48171	0.900355	610.842	14.4633	613.932	16.9608	626.261	25.8601	610.842	14.4633	97.5379
JH16J1-Spot 243	112.794	55818.8	0.606394	16.6496	1.0484	0.822864	3.34209	0.0994075	2.29369	0.909496	610.936	13.3695	609.645	15.3199	605.773	22.678	610.936	13.3695	100.852
JH16J1-Spot 60	111.747	9344.21	3.81854	16.5484	1.11716	0.83076	3.62277	0.0997515	2.50561	0.913331	612.952	14.6507	614.034	16.6938	618.944	24.1322	612.952	14.6507	99.0319
JH16J1-Spot 152	194.031	103105	5.28149	16.5956	0.986063	0.835783	3.06762	0.100641	2.08156	0.903727	618.165	12.2698	616.816	14.1818	612.789	21.3034	618.165	12.2698	100.877
JH16J1-Spot 126	258.116	150699	3.48503	16.307	1.0771	0.851551	4.03108	0.100756	2.95398	0.939495	618.84	17.4304	625.5	18.8268	650.616	23.1348	618.84	17.4304	95.1159
JH16J1-Spot 155	186.341	36290.4	3.14618	16.5872	1.06887	0.844331	3.72499	0.101619	2.65612	0.927702	623.889	15.7946	621.533	17.3169	613.883	23.1027	623.889	15.7946	101.63
JH16J1-Spot 131	188.698	228936	3.03291	16.4402	0.921798	0.853814	3.23983	0.101849	2.31803	0.929223	625.238	13.8126	626.741	15.1524	633.127	19.8516	625.238	13.8126	98.7539
JH16J1-Spot 42	109.774	77338.3	2.57402	16.5234	1.01874	0.855266	3.69181	0.102539	2.67306	0.934437	629.27	16.0259	627.535	17.2825	622.204	21.9964	629.27	16.0259	101.136
JH16J1-Spot 39	43.3752	13531.9	2.69493	15.9715	1.73518	0.887557	4.52744	0.102856	2.79225	0.849359	631.123	16.7874	645.056	21.6194	695.087	36.9991	631.123	16.7874	90.7978
JH16J1-Spot 250	584.009	183888	5.62664	16.1082	1.05285	0.904717	3.54031	0.105742	2.48746	0.920906	647.972	15.3345	654.245	17.0763	676.855	22.5066	647.972	15.3345	95.7328
JH16J1-Spot 245	729.659	304306	13.2407	16.2342	1.08363	0.90021	3.55768	0.106038	2.47405	0.915989	649.697	15.2904	651.84	17.1151	660.193	23.2284	649.697	15.2904	98.4101
JH16J1-Spot 117	99.0569	39080.4	5.15239	15.7826	1.19804	0.928557	4.15194	0.106335	2.9539	0.926683	651.425	18.3022	666.875	20.3009	720.348	25.4279	651.425	18.3022	90.432
JH16J1-Spot 109	308.262	111624	7.33185	16.4899	1.13279	0.890976	3.67329	0.106603	2.5405	0.913321	652.992	15.7768	646.894	17.5755	626.585	24.4356	652.992	15.7768	104.214
JH16J1-Spot 16	70.0709	33579.4	3.64017	15.9988	0.979146	0.92321	3.63708	0.107171	2.65793	0.938354	656.296	16.5854	664.056	17.7297	691.439	20.873	656.296	16.5854	94.9174
JH16J1-Spot 257	453.49	405306	2.7532	15.3305	1.06733	0.974594	3.55598	0.108409	2.48866	0.919044	663.503	15.691	690.829	17.823	781.732	22.43	663.503	15.691	84.876
JH16J1-Spot 237	152.206	90816.1	3.43889	16.2442	1.04783	0.927233	2.67613	0.109288	1.62831	0.840929	668.614	10.3415	666.178	13.0742	658.898	22.4455	668.614	10.3415	101.475
JH16J1-Spot 172	206.155	1.00793e+06	7.22177	16.0842	0.731563	0.94308	3.07266	0.110061	2.34109	0.954483	673.104	14.9632	674.493	15.1438	680.044	15.612	673.104	14.9632	98.9794
JH16J1-Spot 34	116.456	24586.7	4.17069	16.2299	1.1044	0.946915	3.38081	0.11151	2.27641	0.899707	681.512	14.7221	676.495	16.6976	660.761	23.6712	681.512	14.7221	103.14
JH16J1-Spot 231	116.825	28007.6	3.69385	16.284	1.05307	0.946185	3.24251	0.111796	2.18944	0.901179	683.17	14.1923	676.114	16.0081	653.6	22.5906	683.17	14.1923	104.524
JH16J1-Spot 146	116.309	36812.8	1.94139	15.7975	1.04759	0.991466	2.88113	0.113646	1.83354	0.868273	693.889	12.0619	699.468	14.5656	718.339	22.2324	693.889	12.0619	96.5964
JH16J1-Spot 211	138.441	125483	1.26481	15.5681	0.984666	1.05295	3.37173	0.118941	2.38707	0.924438	724.466	16.3572	730.342	17.5613	749.316	20.7813	724.466	16.3572	96.6836
JH16J1-Spot 95	192.05	45084.1	2.32969	15.473	1.15806	1.07361	3.12899	0.120534	1.97093	0.862185	733.635	13.667	740.511	16.451	762.257	24.4131	733.635	13.667	96.245
JH16J1-Spot 219	179.644	113007	0.571935	15.1387	1.40887	1.09877	4.42465	0.120693	3.01578	0.906009	734.554	20.9371	752.756	23.5249	808.124	29.495	734.554	20.9371	90.8962
JH16J1-Spot 144	116.396	59260.4	1.98525	14.571	0.974239	1.1698	3.29104	0.123677	2.3168	0.921814	751.693	16.4382	786.55	18.0177	887.627	20.1257	751.693	16.4382	84.6857
JH16J1-Spot 139	415.85	114263	2.03826	14.8469	1.07411	1.15453	3.10616	0.124374	2.03205	0.88409	755.69	14.4901	779.382	16.9023	848.727	22.3255	755.69	14.4901	89.038
JH16J1-Spot 165	249.894	109649	1.32905	15.5496	0.818423	1.10309	3.04741	0.124457	2.22899	0.938723	756.164	15.9039	754.842	16.2312	751.827	17.2617	756.164	15.9039	100.577
JH16J1-Spot 81	243.251	344376	1.63136	15.5537	1.07452	1.10457	3.01664	0.124656	1.94212	0.875004	757.308	13.8768	755.556	16.0775	751.273	22.6723	757.308	13.8768	100.803
JH16J1-Spot 230	357.76	91549.8	0.916539	15.5247	1.16613	1.11705	3.75704	0.12583	2.59092	0.911893	764.033	18.6674	761.561	20.1314	755.21	24.5912	764.033	18.6674	101.168
JH16J1-Spot 225	171.72	65186.6	3.96157	14.1819	1.1171	1.23381	3.54555	0.126961	2.42845	0.908488	770.505	17.6364	816.07	19.8871	943.287	22.886	770.505	17.6364	81.6829
JH16J1-Spot 272	637.411	976454	5.16239	14.4199	0.950213	1.21641	3.2049	0.127271	2.25469	0.921508	772.277	16.4099	808.132	17.8616	909.115	19.5682	772.277	16.4099	84.9483
JH16J1-Spot 177	608.231	119542	1.16959	15.3659	1.08713	1.14178	3.55012	0.1273	2.46299	0.914847	772.442	17.9296	773.352	19.219	776.873	22.8638	772.442	17.9296	99.4297
JH16J1-Spot 173	22.7295	11143.3	1.68749	14.8873	1.48163	1.18096	3.87479	0.127567	2.39316	0.850241	773.971	17.4537	791.76	21.3073	843.092	30.834	773.971	17.4537	91.8014
JH16J1-Spot 197	64.8081	65806.8	0.819107	15.3087	1.40846	1.15235	3.31848	0.128	1.91003	0.804841	776.447	13.9721	778.353	18.0421	784.718	29.6046	776.447	13.9721	98.9459
JH16J1-Spot 107	40.984	38731.2	0.835069	14.5628	1.27719	1.21569	3.40147	0.128456	2.12428	0.857026	779.051	15.5884	807.802	18.9522	888.771	26.4077	779.051	15.5884	87.6549
JH16J1-Spot 23	94.0735	22268.3	0.651908	15.0602	1.14924	1.18159	3.78322	0.129117	2.63397	0.916555	782.828	19.4167	792.054	20.8087	819.041	24.0113	782.828	19.4167	95.5786
JH16J1-Spot 15	18.6334	9328.36	1.02749	15.2863	1.65322	1.16986	4.50862	0.129755	2.8554	0.865414	786.466	21.141	786.578	24.6866	787.792	34.7291	786.466	21.141	99.8316
JH16J1-Spot 101	170.299	177670	1.62065	15.4293	1.15078	1.16253	4.19204	0.130148	3.04126	0.935283	788.708	22.5774	783.142	22.886	768.211	24.2368	788.708	22.5774	102.668
JH16J1-Spot 198	140.994	102133	1.38235	15.2532	1.00423	1.17891	2.97655	0.130476	1.97232	0.891137	790.579	14.6745	790.806	16.3539	792.338	21.0874	790.579	14.6745	99.7781
JH16J1-Spot 232	75.3841	856943	0.412667	15.1048	1.15036	1.19168	3.83984	0.130606	2.68948	0.919426	791.32	20.028	796.739	21.2026	812.86	24.0742	791.32	20.028	97.35
JH16J1-Spot 235	77.8276	467028	1.11652	15.2388	1.24511	1.18212	3.53847	0.130707	2.29335	0.878829	791.9	17.0899	792.3	19.4662	794.32	26.1337	791.9	17.0899	99.6953
JH16J1-Spot 88	40.7369	34733	0.530774	14.6209	1.18285	1.23941	3.34012	0.131485	2.15727	0.876841	796.331	16.1603	818.614	18.7725	880.539	24.47	796.331	16.1603	90.4367
JH16J1-Spot 105	110.702	39624.4	1.32026	15.0577	0.847381	1.20379	2.66453	0.131522	1.81715	0.906302	796.541	13.6159	802.336	14.7796	819.388	17.7205	796.541	13.6159	97.2116
JH16J1-Spot 241	56.7891	118319	0.8456	14.9819	1.38957	1.21885	3.77296	0.132497	2.38339	0.863895	802.094	17.9756	809.249	21.0473	829.876	28.9784	802.094	17.9756	96.6523
JH16J1-Spot 249	37.8236	258088	2.04752	14.5562	1.35327	1.25484	5.45144	0.132533	4.09817	0.949568	802.299	30.9161	825.587	30.8139	889.708	27.9761	802.299	30.9161	90.1755
JH16J1-Spot 175	205.782	257774	2.17672	14.9561	1.12557	1.24127	4.05936	0.134702	2.93379	0.933646	814.634	22.4513	819.458	22.8314	833.471	23.4598	814.634	22.4513	97.74
JH16J1-Spot 24	78.6354	85261.2	1.35723	14.865	1.02784	1.25172	3.31999	0.135008	2.29215	0.912462	816.37	17.5761	824.179	18.7416	846.227	21.3799	816.37	17.5761	96.4717
JH16J1-Spot 7	89.0556	34681.8	2.53635	14.3645	1.13381	1.29678	3.27432	0.135159	2.14051	0.883685	817.227	16.4295	844.299	18.7736	917.072	23.3224	817.227	16.4295	89.1126
JH16J1-Spot 213	93.6127	74383.6	1.28461	14.5609	1.05345	1.28875	3.22492	0.136158	2.17146	0.899713	822.9	16.7755	840.742	18.4402	889.066	21.7647	822.9	16.7755	92.5578
JH16J1-Spot 248	74.4172	30412.7	1.64408	14.513	0.99539	1.30509	3.43886	0.137431	2.44347	0.926105	830.118	19.032	847.966	19.7721	895.847	20.5549	830.118	19.032	92.6629
JH16J1-Spot 63	196.401	1.03403e+06	1.32876	14.1875	0.956187	1.34354	3.73631	0.138307	2.78012	0.945632	835.081	21.7755	864.764	21.7529	942.508	19.5913	835.081	21.7755	88.602
JH16J1-Spot 251	33.6024	47909.8	0.553556	14.5094	1.38048	1.31481	3.45197	0.138421	2.07149	0.832146	835.726	16.2368	852.24	19.9113	896.373	28.5064	835.726	16.2368	93.2342
JH16J1-Spot 196	155.34	51219.7	1.93221	14.9913	0.983313	1.27751	2.98321	0.13896	1.9999	0.897393	838.778	15.7293	835.742	16.9925	828.589	20.5104	838.778	15.7293	101.23
JH16J1-Spot 90	189.621	137811	10.0968	14.6905	1.15761	1.32173	4.36369	0.140886	3.20609	0.940568	849.672	25.5224	855.271	25.2293	870.721	23.9843	849.672	25.5224	97.5825
JH16J1-Spot 242	107.483	19981.5	1.07537	14.4415	1.65313	1.34798	4.35811	0.141248	2.70499	0.853271	851.715	21.5818	866.684	25.4102	906.026	34.0805	851.715	21.5818	94.0056
JH16J1-Spot 194	86.0726	28336.8	1.0487	14.8437	0.906127	1.31174	3.02388	0.14128	2.11775	0.919378	851.894	16.8998	850.892	17.4239	849.165	18.8324	851.894	16.8998	100.321
JH16J1-Spot 25	65.803	4.49809e+06	1.83491	14.6499	1.1774	1.33126	3.56006	0.14151	2.38267	0.896515	853.193	19.041	859.431	20.6452	876.437	24.3626	853.193	19.041	97.3479
JH16J1-Spot 121	49.3641	18748.7	1.60656	14.6369	1.31165	1.34037	3.82936	0.142352	2.51771	0.886865	857.947	20.225	863.391	22.2724	878.288	27.1336	857.947	20.225	97.684
JH16J1-Spot 127	164.415	55384.7	0.894886	14.5646	1.15427	1.39602	3.07977	0.147528	1.92551	0.857697	887.094	15.9579	887.25	18.222	888.557	23.8302	887.094	15.9579	99.8354
JH16J1-Spot 50	267.697	203129	2.98024	14.7803	1.10821	1.38746	3.81724	0.148796	2.70903	0.925551	894.211	22.6195	883.619	22.5287	858.069	23.0079	894.211	22.6195	104.212
JH16J1-Spot 145	9.9526	4200.76	2.40531	14.6505	2.05478	1.40494	4.70125	0.149347	2.64648	0.789872	897.304	22.1684	891.023	27.8937	876.366	42.5457	897.304	22.1684	102.389
JH16J1-Spot 135	77.1747	63781	1.28451	14.4784	1.08005	1.43255	3.76197	0.150493	2.68192	0.927605	903.727	22.6151	902.614	22.4991	900.769	22.2729	900.769	22.2729	100.328
JH16J1-Spot 51	455.953	379227	2.58858	14.4299	0.852104	1.48385	3.06352	0.155361	2.21141	0.933125	930.944	19.1696	923.805	18.585	907.678	17.5623	907.678	17.5623	102.563
JH16J1-Spot 10	34.2189	27400.9	0.766264	14.388	1.14077	1.41734	3.54325	0.147966	2.40247	0.903336	889.553	19.9624	896.245	21.0975	913.663	23.4915	913.663	23.4915	97.3612
JH16J1-Spot 204	18.545	9869.31	2.62063	14.1964	1.45294	1.51658	3.49357	0.156218	2.04063	0.81461	935.724	17.7735	937.098	21.3805	941.243	29.7805	941.243	29.7805	99.4137
JH16J1-Spot 186	122.873	40198	1.22669	14.1657	1.2385	1.58407	3.78652	0.162817	2.54802	0.899384	972.413	22.9991	963.971	23.5732	945.658	25.3506	945.658	25.3506	102.829
JH16J1-Spot 85	71.461	109694	2.03742	14.146	1.19771	1.45296	4.09622	0.149134	2.89851	0.924205	896.105	24.2493	911.1	24.6412	948.526	24.5169	948.526	24.5169	94.4734
JH16J1-Spot 184	121.552	514575	1.97722	14.1444	1.13241	1.49555	3.33652	0.153488	2.20411	0.889474	920.484	18.9066	928.577	20.3056	948.749	23.1698	948.749	23.1698	97.0209
JH16J1-Spot 158	383.474	145052	2.37577	14.1432	1.04764	1.49489	3.42857	0.153407	2.38092	0.91531	920.035	20.414	928.309	20.8623	948.922	21.4632	948.922	21.4632	96.9558
JH16J1-Spot 40	230.659	70631.2	19.0006	14.1028	1.08661	1.4176	3.72577	0.14506	2.63916	0.924691	873.21	21.5528	896.354	22.1863	954.737	22.2241	954.737	22.2241	91.4607
JH16J1-Spot 1	84.161	27237.8	1.79321	14.1011	0.880912	1.4073	2.73968	0.143989	1.85876	0.903654	867.179	15.0817	892.022	16.2639	954.987	18.0221	954.987	18.0221	90.8053
JH16J1-Spot 75	283.585	218608	1.42262	14.0907	0.993978	1.51113	3.03512	0.154498	2.04114	0.899064	926.131	17.6085	934.897	18.5476	956.49	20.3348	956.49	20.3348	96.826
JH16J1-Spot 122	164.073	57084	1.02836	14.088	1.23982	1.54987	3.66962	0.158428	2.4298	0.890743	948.037	21.4217	950.443	22.6517	956.89	25.3465	956.89	25.3465	99.0748
JH16J1-Spot 59	343.497	196863	1.62004	14.0836	0.930158	1.49894	3.00452	0.153174	2.07436	0.912465	918.733	17.7621	929.955	18.3012	957.522	19.0213	957.522	19.0213	95.949
JH16J1-Spot 262	201.832	101351	1.4822	14.0762	1.26534	1.47111	4.27114	0.150251	3.00581	0.921665	902.37	25.3108	918.583	25.8238	958.6	25.864	958.6	25.864	94.1342
JH16J1-Spot 114	80.8288	328462	1.61114	14.0336	1.04816	1.52522	3.09797	0.155307	2.0498	0.890349	930.644	17.7634	940.579	19.0016	964.825	21.3868	964.825	21.3868	96.4573
JH16J1-Spot 167	248.369	91815.3	1.67993	14.0304	0.922035	1.60722	3.37696	0.163619	2.45493	0.936149	976.856	22.2526	973.025	21.1406	965.293	18.8282	965.293	18.8282	101.198
JH16J1-Spot 43	231.462	180517	1.84692	14.0185	0.904145	1.49206	3.17019	0.151766	2.26605	0.928798	910.855	19.2486	927.155	19.275	967.022	18.4382	967.022	18.4382	94.1918
JH16J1-Spot 18	448.712	312627	2.16962	14.0175	0.958635	1.55804	3.18864	0.158467	2.23	0.918709	948.253	19.6644	953.691	19.7225	967.143	19.5863	967.143	19.5863	98.0468
JH16J1-Spot 226	81.1987	103612	2.11123	14.0113	1.0062	1.50269	3.14386	0.152768	2.13766	0.904779	916.463	18.262	931.476	19.1693	968.051	20.5393	968.051	20.5393	94.6709
JH16J1-Spot 21	493.359	939334	1.66721	13.9463	1.16105	1.4537	3.70057	0.147103	2.53952	0.909458	884.705	20.9938	911.406	22.265	977.558	23.6485	977.558	23.6485	90.5015
JH16J1-Spot 185	15.9974	12668.1	1.69763	13.8763	1.54252	1.65135	3.56795	0.166265	2.02543	0.795557	991.498	18.614	990.067	22.5679	987.773	31.3858	987.773	31.3858	100.377
JH16J1-Spot 258	153.518	87536.8	0.840632	13.8757	1.25404	1.62303	3.68928	0.163407	2.43524	0.889046	975.681	22.0496	979.166	23.1831	987.856	25.4967	987.856	25.4967	98.7675
JH16J1-Spot 138	194.987	148379	7.04672	13.8647	1.03707	1.57737	3.17053	0.158684	2.13346	0.899373	949.458	18.8353	961.335	19.7049	989.468	21.0762	989.468	21.0762	95.9564
JH16J1-Spot 70	155.164	118522	4.8126	13.8375	1.10748	1.61898	2.93801	0.16255	1.83053	0.855598	970.931	16.4995	977.594	18.4433	993.497	22.4969	993.497	22.4969	97.7286
JH16J1-Spot 62	49.7313	35737.6	1.97744	13.7744	1.24104	1.69038	3.6641	0.168944	2.42306	0.89005	1006.29	22.5753	1004.91	23.38	1002.75	25.189	1002.75	25.189	100.353
JH16J1-Spot 199	123.5	39992.4	2.52774	13.7691	1.05086	1.49149	3.296	0.149009	2.24514	0.905699	895.405	18.7695	926.923	20.0371	1003.53	21.3108	1003.53	21.3108	89.2254
JH16J1-Spot 170	135.086	25504.6	0.889491	13.7691	0.872908	1.6407	3.05818	0.163916	2.18527	0.928653	978.504	19.8393	985.983	19.2955	1003.53	17.7162	1003.53	17.7162	97.506
JH16J1-Spot 87	160.286	77682.9	4.60497	13.7514	1.08857	1.67679	3.75125	0.167307	2.66269	0.925634	997.255	24.6019	999.766	23.8644	1006.14	22.0728	1006.14	22.0728	99.1166
JH16J1-Spot 65	22.1712	25774.1	21.1378	13.6394	1.4506	1.53575	3.94165	0.151986	2.49105	0.864157	912.088	21.1865	944.802	24.244	1022.7	29.3645	1022.7	29.3645	89.1842
JH16J1-Spot 45	239.784	209299	1.83757	13.6309	1.26699	1.66376	3.78657	0.164552	2.51958	0.893404	982.023	22.9505	994.81	24.0188	1023.97	25.6569	1023.97	25.6569	95.9031
JH16J1-Spot 202	10.4499	4707.53	1.32836	13.5884	1.66921	1.74901	4.4305	0.172444	2.76129	0.855787	1025.56	26.1811	1026.8	28.6295	1030.29	33.7496	1030.29	33.7496	99.5413
JH16J1-Spot 210	326.281	59784.5	1.36434	13.547	0.954439	1.50606	3.31847	0.148038	2.36403	0.927278	889.956	19.6512	932.844	20.2524	1036.45	19.2951	1036.45	19.2951	85.8658
JH16J1-Spot 13	112.91	90278.5	1.92429	13.5384	1.21001	1.59466	3.84615	0.156647	2.63614	0.908832	938.117	23.015	968.121	24.0063	1037.73	24.4529	1037.73	24.4529	90.4008
JH16J1-Spot 189	185.581	29468.8	2.4085	13.5235	1.00677	1.75652	2.7224	0.172357	1.71563	0.862466	1025.09	16.2597	1029.57	17.6164	1039.96	20.3411	1039.96	20.3411	98.57
JH16J1-Spot 255	49.2956	15713.6	1.59526	13.4951	1.05716	1.69455	3.30027	0.165928	2.24311	0.904574	989.635	20.5787	1006.48	21.0771	1044.19	21.3458	1044.19	21.3458	94.775
JH16J1-Spot 227	364.463	38891.2	1.44791	13.4895	1.77861	1.54844	5.22421	0.151557	3.44559	0.888595	909.687	29.2332	949.872	32.2416	1045.08	35.8925	1045.08	35.8925	87.0447
JH16J1-Spot 41	276.825	132872	1.30887	13.3583	0.941875	1.78787	3.96221	0.173291	3.02034	0.954658	1030.22	28.7572	1041.05	25.8062	1064.75	18.923	1064.75	18.923	96.7563
JH16J1-Spot 195	210.351	90304.2	2.01491	13.331	1.12327	1.90902	3.21129	0.184655	2.08802	0.880657	1092.36	20.9809	1084.24	21.4012	1068.87	22.5567	1068.87	22.5567	102.197
JH16J1-Spot 14	243.125	57849.5	1.28779	13.3026	1.0097	1.91843	3.69448	0.185169	2.68478	0.935996	1095.15	27.0407	1087.52	24.6641	1073.16	20.2803	1073.16	20.2803	102.049
JH16J1-Spot 110	366.231	101506	15.9171	13.299	1.02039	1.84481	3.48799	0.178017	2.46759	0.924107	1056.13	24.0383	1061.58	22.9709	1073.69	20.4936	1073.69	20.4936	98.3643
JH16J1-Spot 270	140.328	55333.2	3.63906	13.2448	1.29385	1.88937	4.09019	0.181572	2.79634	0.907561	1075.56	27.7013	1077.36	27.1638	1081.9	25.9358	1081.9	25.9358	99.4136
JH16J1-Spot 53	430.467	174370	6.71185	13.1339	1.24047	1.85322	4.94513	0.176608	3.70466	0.948254	1048.42	35.8467	1064.58	32.6249	1098.72	24.8086	1098.72	24.8086	95.422
JH16J1-Spot 252	104.986	92645	0.590899	13.0967	1.03946	2.00836	3.21728	0.19085	2.17782	0.902474	1125.98	22.4998	1118.34	21.8121	1104.4	20.7813	1104.4	20.7813	101.954
JH16J1-Spot 32	68.1707	23679.8	1.64973	13.0564	1.27934	1.99056	3.87964	0.188575	2.6003	0.897281	1113.65	26.5951	1112.31	26.2265	1110.54	25.5532	1110.54	25.5532	100.281
JH16J1-Spot 224	158.752	292663	3.20764	13.0266	0.997742	1.68784	6.31672	0.159533	5.31898	0.982858	954.18	47.176	1003.95	40.2975	1115.1	19.8971	1115.1	19.8971	85.5688
JH16J1-Spot 49	12.4626	9799.15	1.56306	12.9953	1.27817	1.77584	3.92373	0.167446	2.64556	0.900419	998.026	24.4612	1036.66	25.4935	1119.94	25.495	1119.94	25.495	89.114
JH16J1-Spot 6	162.179	302013	5.51767	12.9922	0.872497	1.9223	3.56849	0.181213	2.696	0.951417	1073.6	26.6626	1088.87	23.8391	1120.41	17.4126	1120.41	17.4126	95.8217
JH16J1-Spot 174	123.067	147766	1.49732	12.9148	1.02561	2.09974	3.01023	0.196763	1.98462	0.888386	1157.91	21.0345	1148.72	20.7076	1132.28	20.4211	1132.28	20.4211	102.263
JH16J1-Spot 263	34.2537	82600.2	0.918168	12.826	1.28267	1.96382	3.76825	0.182759	2.48557	0.88865	1082.03	24.7588	1103.19	25.3577	1146.05	25.4863	1146.05	25.4863	94.4144
JH16J1-Spot 163	132.465	60846.4	0.968162	12.8027	0.98864	2.13764	3.18686	0.198575	2.19822	0.912008	1167.66	23.4774	1161.06	22.0492	1149.63	19.6155	1149.63	19.6155	101.568
JH16J1-Spot 86	528.193	143138	2.86675	12.7899	0.86401	1.81372	2.8383	0.168317	1.97429	0.916113	1002.83	18.3356	1050.42	18.5791	1151.6	17.1535	1151.6	17.1535	87.0817
JH16J1-Spot 91	380.95	293949	2.48231	12.7243	0.971162	2.0804	3.44852	0.192074	2.47736	0.931018	1132.6	25.7321	1142.37	23.6527	1161.8	19.2525	1161.8	19.2525	97.4868
JH16J1-Spot 26	93.1831	295072	0.992303	12.6603	0.975285	2.14453	3.14795	0.197	2.17266	0.9123	1159.18	23.0507	1163.29	21.8022	1171.82	19.3058	1171.82	19.3058	98.9214
JH16J1-Spot 159	127.161	63361	1.13254	12.6374	0.993128	2.18552	3.24512	0.200401	2.25199	0.914978	1177.47	24.236	1176.44	22.6103	1175.41	19.6538	1175.41	19.6538	100.175
JH16J1-Spot 180	60.88	120851	1.54774	12.5963	1.24344	2.17426	3.20211	0.19872	1.95867	0.844245	1168.44	20.9318	1172.84	22.2743	1181.85	24.5971	1181.85	24.5971	98.8651
JH16J1-Spot 4	20.4282	37137	1.41609	12.5935	1.30416	2.1489	3.54823	0.196358	2.24407	0.864595	1155.72	23.7434	1164.7	24.5914	1182.3	25.7961	1182.3	25.7961	97.7521
JH16J1-Spot 205	53.9756	69342.1	0.928467	12.5824	0.764169	2.22185	2.79054	0.202846	2.02637	0.935678	1190.59	22.029	1187.95	19.5425	1184.04	15.1057	1184.04	15.1057	100.553
JH16J1-Spot 179	103.35	47982.4	1.04113	12.5276	1.14023	2.23701	2.82586	0.203341	1.68563	0.828295	1193.24	18.3619	1192.72	19.8317	1192.61	22.5214	1192.61	22.5214	100.053
JH16J1-Spot 19	28.2885	27676	0.573693	12.3767	1.24096	2.26577	3.87932	0.203473	2.63836	0.9049	1193.95	28.7558	1201.7	27.3351	1216.51	24.4113	1216.51	24.4113	98.1461
JH16J1-Spot 228	61.3316	77412.8	3.04761	11.9015	1.22728	2.49994	4.0143	0.215883	2.78702	0.915195	1260.08	31.8998	1272.02	29.1224	1293.07	23.8742	1293.07	23.8742	97.449
JH16J1-Spot 169	102.375	32356.6	1.89936	11.4803	1.08686	2.71031	3.27732	0.225767	2.19046	0.895792	1312.27	26.008	1331.28	24.3131	1362.82	20.9383	1362.82	20.9383	96.2913
JH16J1-Spot 212	301.46	245196	2.60273	10.7774	0.835099	3.07379	3.50813	0.240368	2.67303	0.954503	1388.61	33.3928	1426.18	26.8833	1483.52	15.8249	1483.52	15.8249	93.6028
JH16J1-Spot 171	95.4077	95085.6	1.61617	10.1583	0.797764	3.62073	4.0888	0.266875	3.29104	0.971854	1524.92	44.6922	1554.1	32.5432	1594.79	14.8971	1594.79	14.8971	95.6189
JH16J1-Spot 260	256.524	157052	1.57579	10.0592	1.06887	3.59669	3.86851	0.262515	2.79964	0.934227	1502.69	37.5268	1548.8	30.7443	1613.08	19.9109	1613.08	19.9109	93.1567
JH16J1-Spot 106	579.506	593040	3.09911	9.84763	0.969574	3.54707	3.89589	0.253448	2.92632	0.949252	1456.23	38.1441	1537.78	30.868	1652.58	17.9693	1652.58	17.9693	88.119
JH16J1-Spot 193	496.39	236976	1.80715	9.60289	1.05175	4.20293	3.64074	0.292848	2.58898	0.926469	1655.74	37.8048	1674.59	29.8709	1699.08	19.3777	1699.08	19.3777	97.4496
JH16J1-Spot 102	1086.44	521125	13.5845	9.44506	1.02126	4.04662	3.31758	0.277322	2.29633	0.913713	1577.86	32.1396	1643.62	27.0176	1729.55	18.7436	1729.55	18.7436	91.2296
JH16J1-Spot 29	152.133	484201	2.29048	9.44006	1.05847	4.42257	3.4788	0.302927	2.42033	0.916216	1705.81	36.2756	1716.58	28.8168	1730.52	19.4243	1730.52	19.4243	98.5716
JH16J1-Spot 17	127.293	455448	1.41312	9.37148	1.05124	4.54028	3.18162	0.30873	2.13039	0.896765	1734.46	32.3974	1738.38	26.4806	1743.89	19.2594	1743.89	19.2594	99.459
JH16J1-Spot 183	1797.74	118649	3.90449	9.15048	0.850196	3.7766	2.99285	0.250746	2.14265	0.9295	1442.32	27.6909	1587.78	24.0313	1787.49	15.4916	1787.49	15.4916	80.6895
JH16J1-Spot 8	763.798	877266	28.9185	9.08817	0.946475	4.00847	3.97503	0.264328	3.02856	0.954475	1511.95	40.8172	1635.91	32.314	1799.94	17.2198	1799.94	17.2198	84
JH16J1-Spot 160	67.5764	114522	2.16697	9.01916	1.08314	4.84053	4.20804	0.316772	3.1249	0.944851	1773.95	48.4617	1791.97	35.4263	1813.79	19.6732	1813.79	19.6732	97.8032
JH16J1-Spot 264	34.525	29262.9	0.835335	8.92782	1.02039	5.10507	3.0903	0.330701	2.06991	0.896938	1841.78	33.161	1836.95	26.2445	1832.26	18.4915	1832.26	18.4915	100.52
JH16J1-Spot 2	369.615	208923	2.02391	8.89776	0.992576	5.05236	3.29934	0.326184	2.30677	0.918573	1819.86	36.5751	1828.14	27.9728	1838.37	17.9741	1838.37	17.9741	98.9932
JH16J1-Spot 164	224.371	155309	6.10161	8.8735	1.13493	5.14181	3.42271	0.331054	2.28778	0.895826	1843.49	36.6809	1843.04	29.103	1843.31	20.5401	1843.31	20.5401	100.01
JH16J1-Spot 207	155.587	169863	4.83976	8.83699	1.06277	5.28142	3.86402	0.338644	2.80125	0.934972	1880.14	45.6831	1865.86	33.0001	1850.77	19.2165	1850.77	19.2165	101.587
JH16J1-Spot 112	82.0281	105303	1.419	8.81807	0.91565	4.92962	3.52181	0.31541	2.60616	0.943463	1767.27	40.2846	1807.34	29.7377	1854.64	16.5482	1854.64	16.5482	95.2893
JH16J1-Spot 244	326.23	2.80179e+06	5.31804	8.80005	0.898441	5.35057	3.36301	0.341643	2.46457	0.93952	1894.57	40.4577	1876.98	28.7781	1858.34	16.2299	1858.34	16.2299	101.95
JH16J1-Spot 216	226.55	132979	1.11711	8.76141	1.08226	4.98693	3.70043	0.317026	2.61817	0.924157	1775.19	40.6277	1817.11	31.3075	1866.28	19.5322	1866.28	19.5322	95.119
JH16J1-Spot 31	257.63	257042	1.61319	8.75329	1.15544	5.13281	3.44596	0.325998	2.29052	0.892834	1818.95	36.3018	1841.55	29.2925	1867.96	20.8491	1867.96	20.8491	97.3766
JH16J1-Spot 20	224.295	603576	1.4792	8.70515	0.791362	5.20565	2.93294	0.328805	2.14158	0.938007	1832.59	34.1612	1853.54	24.9866	1877.9	14.2615	1877.9	14.2615	97.587
JH16J1-Spot 124	145.039	984606	3.96038	8.622	1.02971	5.21905	3.11553	0.326503	2.08582	0.896686	1821.41	33.0962	1855.73	26.5539	1895.18	18.5194	1895.18	18.5194	96.1075
JH16J1-Spot 115	36.4702	18232.5	2.85676	8.24148	1.12273	5.58295	3.4372	0.333854	2.31447	0.899728	1857.03	37.3441	1913.47	29.6074	1975.97	20.0007	1975.97	20.0007	93.9809
JH16J1-Spot 143	85.0808	62931.9	0.631339	8.10526	0.879918	6.25844	3.80431	0.368062	2.92439	0.957592	2020.28	50.7198	2012.66	33.3184	2005.61	15.6206	2005.61	15.6206	100.731
JH16J1-Spot 36	164.472	247104	2.70065	7.93179	0.938356	6.25773	2.99834	0.360144	2.05998	0.910033	1982.86	35.1623	2012.56	26.2557	2043.93	16.5849	2043.93	16.5849	97.012
JH16J1-Spot 73	289.284	225434	2.36376	7.79923	0.806973	6.37079	2.84621	0.360523	2.03923	0.929842	1984.65	34.835	2028.25	24.9841	2073.67	14.2141	2073.67	14.2141	95.7073
JH16J1-Spot 154	286.357	1.50598e+06	5.8966	6.96772	1.05539	8.09563	3.69304	0.409288	2.63764	0.928436	2211.67	49.3824	2241.76	33.3878	2270.08	18.1926	2270.08	18.1926	97.4267
JH16J1-Spot 37	1661.14	973193	12.5933	6.90091	1.1951	8.97244	3.78529	0.449267	2.59018	0.908008	2391.99	51.7623	2335.2	34.5944	2286.68	20.5649	2286.68	20.5649	104.606
JH16J1-Spot 80	766.603	597707	1.17098	6.5273	1.13732	9.42227	3.54574	0.446248	2.40842	0.904247	2378.55	47.9062	2380	32.5596	2381.97	19.3757	2381.97	19.3757	99.8564
JH16J1-Spot 111	262.767	159515	1.45182	6.5086	0.942426	8.86891	3.59723	0.418837	2.6548	0.942383	2255.2	50.521	2324.61	32.836	2386.86	16.0467	2386.86	16.0467	94.4841
JH16J1-Spot 79	424.037	525135	1.35899	6.4878	0.771659	8.69621	3.00362	0.409369	2.23196	0.945109	2212.04	41.7927	2306.68	27.3594	2392.3	13.1311	2392.3	13.1311	92.4648
JH16J1-Spot 93	346.734	799130	1.57235	6.41042	0.94246	7.57204	4.32808	0.352199	3.38562	0.96337	1945.09	56.848	2181.56	38.8388	2412.7	16.0046	2412.7	16.0046	80.6186
JH16J1-Spot 151	183.996	1.61914e+06	1.61314	6.33558	0.99643	10.1786	3.1386	0.467909	2.14217	0.906709	2474.38	44.0191	2451.13	29.0258	2432.62	16.887	2432.62	16.887	101.717
JH16J1-Spot 153	129.51	107320	1.66503	6.30847	1.05047	9.8242	3.46525	0.449686	2.41478	0.916991	2393.86	48.2879	2418.42	31.9454	2439.89	17.79	2439.89	17.79	98.1133
JH16J1-Spot 200	60.177	70435.7	0.982186	6.26262	1.23078	9.76953	3.6178	0.443933	2.38702	0.888807	2368.22	47.3099	2413.28	33.3355	2452.24	20.8181	2452.24	20.8181	96.574
JH16J1-Spot 217	98.2579	1.33058e+06	1.21586	6.24797	1.04219	10.0468	3.14499	0.455463	2.10279	0.895991	2419.5	42.4203	2439.09	29.0508	2456.2	17.6204	2456.2	17.6204	98.5058
JH16J1-Spot 256	159.658	72326.2	0.57328	6.22208	1.10522	10.4261	3.63247	0.470703	2.52725	0.916218	2486.64	52.1433	2473.38	33.6679	2463.22	18.6731	2463.22	18.6731	100.951
JH16J1-Spot 129	132.582	382005	1.34287	6.18872	1.04739	9.51489	3.22687	0.42726	2.17948	0.901324	2293.36	42.0597	2388.99	29.6574	2472.29	17.6797	2472.29	17.6797	92.7624
JH16J1-Spot 35	40.0258	225961	1.00089	6.18831	1.05413	10.4085	3.4511	0.467357	2.39697	0.91539	2471.96	49.2155	2471.81	31.9809	2472.4	17.7933	2472.4	17.7933	99.9821
JH16J1-Spot 178	539.138	404926	2.81111	6.17402	1.08897	8.38654	3.76476	0.375698	2.67579	0.926234	2056.16	47.1079	2273.72	34.1671	2476.3	18.3743	2476.3	18.3743	83.0332
JH16J1-Spot 246	142.709	149890	1.07826	6.11844	1.05949	10.8129	3.07396	0.480032	2.01447	0.885056	2527.41	42.1197	2507.18	28.5778	2491.55	17.8493	2491.55	17.8493	101.439
JH16J1-Spot 141	37.3631	374238	0.821944	6.11052	0.926612	10.6676	3.61232	0.472968	2.68571	0.945318	2496.56	55.5939	2494.61	33.5475	2493.73	15.6068	2493.73	15.6068	100.113
JH16J1-Spot 253	116.175	125342	0.507655	6.09021	0.889525	10.6171	3.36717	0.469164	2.47764	0.941181	2479.89	51.0059	2490.2	31.2565	2499.34	14.9737	2499.34	14.9737	99.2219
JH16J1-Spot 104	152.16	108441	1.48925	6.07468	0.977952	9.47773	3.59738	0.417749	2.61943	0.936838	2250.25	49.7565	2385.39	33.0527	2503.64	16.4556	2503.64	16.4556	89.8793
JH16J1-Spot 92	346.153	117109	1.4601	6.02969	1.13092	10.6891	3.70565	0.467653	2.57473	0.915572	2473.26	52.8884	2496.48	34.4208	2516.14	19.0065	2516.14	19.0065	98.2959
JH16J1-Spot 136	129.116	263198	1.31935	5.97248	1.05525	10.7828	3.69771	0.467278	2.64246	0.928687	2471.61	54.25	2504.59	34.3725	2532.15	17.7093	2532.15	17.7093	97.6093
JH16J1-Spot 38	65.1485	303254	1.72899	5.96836	1.14031	11.0407	3.67359	0.478123	2.53328	0.911877	2519.08	52.8251	2526.57	34.2161	2533.31	19.1348	2533.31	19.1348	99.4385
JH16J1-Spot 30	29.852	66169.7	2.09033	5.76161	1.23145	12.0371	3.79335	0.503216	2.5619	0.901285	2627.6	55.2871	2607.3	35.5772	2592.29	20.5425	2592.29	20.5425	101.362
JH16J1-Spot 234	364.74	634695	2.37569	5.57354	1.02573	12.9275	3.57466	0.522799	2.54893	0.927701	2711.04	56.413	2674.38	33.7028	2647.49	17.0197	2647.49	17.0197	102.4
JH16J1-Spot 142	235.255	539492	1.96146	5.53457	0.977477	12.1294	3.33808	0.487092	2.3606	0.923923	2558.08	49.8451	2614.46	31.3227	2659.13	16.2042	2659.13	16.2042	96.2
JH16J1-Spot 64	94.7239	711561	10.0437	5.44176	0.985717	13.2535	3.3289	0.523307	2.34318	0.92176	2713.19	51.8922	2697.87	31.4397	2687.13	16.2942	2687.13	16.2942	100.97
JH16J1-Spot 68	91.9287	168212	2.19578	5.11852	0.805061	15.1469	2.45115	0.562544	1.64609	0.898319	2877.13	38.2034	2824.52	23.3513	2787.88	13.1837	2787.88	13.1837	103.201
JH16J1-Spot 72	89.2756	272188	1.43817	4.61164	1.1695	17.3413	3.61733	0.580263	2.44783	0.902306	2949.82	57.9437	2953.91	34.7407	2957.38	18.872	2957.38	18.872	99.7445
JH16J1-Spot 48	466.666	1.1925e+06	1.33795	4.35834	1.10115	19.7095	3.39305	0.623283	2.29189	0.901363	3122.97	56.7302	3077.21	32.8002	3048.17	17.6283	3048.17	17.6283	102.454
JH16J1-Spot 66	60.4688	341920	1.20661	3.92294	1.01001	21.6579	3.97642	0.616476	2.96642	0.946634	3095.88	72.9316	3168.51	38.6126	3215.51	15.9492	3215.51	15.9492	96.2796
JH16J1-Spot 274	210.756	156853	3.27578	2.00559	47.9646	15.5683	97.9646	0.226554	50	0.721643	1316.41	597.053	2850.68	1616.91	NA	NA	5000	1824.56	NA		Aborted laser shots
JH16J1-Spot 275	289.026	56345.6	8.48137	2.00593	39.872	17.1281	89.872	0.249295	50	0.781844	1434.84	645.333	2942.04	1272.35	NA	NA	5000	1867.32	NA		Aborted laser shots
JH16J1-Spot 277	271.412	33540.8	24.3694	2.00622	49.7095	8.6114	99.7095	0.125355	50	0.709164	761.309	359.409	2297.76	1460.42	NA	NA	5000	1815.34	NA		Aborted laser shots
Notes
Analyses with >10% uncertainty (1-sigma) in 206Pb/207Pb age are not included, unless 206Pb/238U age is <400 Ma.
Best age is determined from 206Pb/238U age for analyses with 206Pb/238U age <1000 Ma and from 206Pb/207Pb age for analyses with 206Pb/238Uage >1000 Ma.
Concordance is based on 206Pb/238U age / 206Pb/207Pb age. Value is not reported for 206Pb/238U ages <400 Ma because of large uncertainty in 206Pb/207Pb age.
Analyses with 206Pb/238U age >400 Ma and with >10% discordance (<90% concordance) are not included.
Analyses with 206Pb/238U age >400 Ma and with >5% reverse discordance (<105% concordance) are not included.
Uncertainties are reported at the 1-sigma level, and include only measurement errors.
Analyses conducted by LA-ICPMS, as described by Gehrels et al. (2008) and Gehrels and Pecha (2014).
U concentration and U/Th are calibrated relative to FC-1 zircon standard and are accurate to ~20%.
Common Pb correction is from measured 204Pb with common Pb composition interpreted from Stacey and Kramers (1975).
Common Pb composition assigned uncertainties of 1.5 for 206Pb/204Pb, 0.3 for 207Pb/204Pb, and 2.0 for 208Pb/204Pb.
U/Pb and 206Pb/207Pb fractionation is calibrated relative to fragments of large Sri Lanka zircons and individual crystals of FC-1, and R33.
U decay constants and composition as follows: 238U = 9.8485 x 10-10, 235U = 1.55125 x 10-10, 238U/235U = 137.82.
U-Th disequilibrium correction is applied to 206/238 ages assuming a value of 2.3 for the magma.
Gehrels, G.E., Valencia, V., Ruiz, J., 2008, Enhanced precision, accuracy, efficiency, and spatial resolution of U-Pb ages by laser ablation-multicollector-inductively coupled plasma-mass spectrometry: Geochemistry, Geophysics, Geosystems, v. 9, Q03017, doi:10.1029/2007GC001805.
Gehrels, G. and Pecha, M., 2014, Detrital zircon U-Pb geochronology and Hf isotope geochemistry of Paleozoic and Triassic passive margin strata of western North America: Geosphere, v. 10 (1), p. 49-65.
Ludwig, K., 2008, Isoplot 3.6: Berkeley Geochronology Center Special Publication 4, 77 p.
Stacey, J.S., and Kramers, J.D., 1975, Approximation of terrestrial lead isotope evolution by a two stage model: Earth and Planetary Science Letters, v. 26, p. 207-221.

## Sheet: D2
Table S5b. U-Pb geochronologic analyses.				JH16-D2
							Isotope ratios						Apparent ages (Ma)
Analysis	U	206Pb	U/Th	206Pb*	±	207Pb*	±	206Pb*	±	error	206Pb*	±	207Pb*	±	206Pb*	±	Best age	±	Conc
	(ppm)	204Pb		207Pb*	(%)	235U*	(%)	238U	(%)	corr.	238U*	(Ma)	235U	(Ma)	207Pb*	(Ma)	(Ma)	(Ma)	(%)
-Spot 204	1848.4	17184.3	7.09414	19.1165	0.900219	0.113384	2.95215	0.0157271	2.05193	0.915748	100.595	2.04811	109.056	3.05266	298.999	20.5347	100.595	2.04811	NA
-Spot 51	2528.81	349767	17.009	20.6507	0.797182	0.109316	2.72695	0.0163798	1.92977	0.924244	104.735	2.00482	105.34	2.72859	120.078	18.788	104.735	2.00482	NA
-Spot 116	1383.9	48451.7	6.03446	20.8388	0.95298	0.109887	3.22938	0.0166152	2.2764	0.922431	106.229	2.39837	105.862	3.24651	98.6229	22.5631	106.229	2.39837	NA
-Spot 164	1392.94	62402.7	2.59563	20.5648	1.16975	0.111794	3.34101	0.0166813	2.17127	0.880369	106.647	2.29655	107.605	3.41116	129.881	27.5095	106.647	2.29655	NA
-Spot 54	493.108	28859	1.90539	20.6492	1.22579	0.112479	4.39753	0.0168524	3.17174	0.932764	107.732	3.38859	108.231	4.51462	120.233	28.8948	107.732	3.38859	NA
-Spot 130	815.036	77236.2	3.1811	20.5289	1.10658	0.113293	3.33915	0.0168755	2.23258	0.895981	107.879	2.38843	108.973	3.45032	133.976	26.0198	107.879	2.38843	NA
-Spot 28	1041.87	23047.9	1.21853	21.0583	1.14424	0.110694	3.70799	0.0169136	2.56376	0.913178	108.12	2.74882	106.6	3.75232	73.7985	27.2026	108.12	2.74882	NA
-Spot 214	344.132	9678.48	1.73796	21.0976	1.47876	0.110681	3.62171	0.0169431	2.14294	0.823056	108.307	2.30158	106.588	3.66461	69.3734	35.19	108.307	2.30158	NA
-Spot 202	441.921	20166.1	1.72385	20.173	1.38805	0.116154	4.55949	0.0170017	3.17144	0.9161	108.679	3.4178	111.58	4.81794	174.917	32.3833	108.679	3.4178	NA
-Spot 111	495.069	24659.8	2.89096	20.7267	1.38258	0.113419	3.41833	0.0170571	2.03575	0.827254	109.03	2.20091	109.088	3.53569	111.421	32.6372	109.03	2.20091	NA
-Spot 282	517.789	15767.6	2.24885	20.7623	1.35285	0.113246	3.71816	0.0170603	2.36531	0.868046	109.05	2.55767	108.93	3.84054	107.366	31.9745	109.05	2.55767	NA
-Spot 178	1231.77	338794	6.97564	20.2895	1.06251	0.115918	3.62892	0.0170651	2.5664	0.923947	109.08	2.77589	111.364	3.8276	161.49	24.8503	109.08	2.77589	NA
-Spot 205	582.439	67861.2	2.51491	20.3133	1.25047	0.115826	3.98313	0.0170716	2.73265	0.909316	109.122	2.95682	111.281	4.19822	158.725	29.2561	109.122	2.95682	NA
-Spot 114	1534.52	6.38145e+06	1.3549	20.5209	1.24479	0.11475	4.09198	0.0170859	2.8472	0.916259	109.213	3.08331	110.302	4.27703	134.892	29.2556	109.213	3.08331	NA
-Spot 194	447.198	25365.7	1.35578	20.4752	1.14511	0.11568	3.26037	0.0171861	2.11526	0.879406	109.847	2.30387	111.148	3.43257	140.146	26.8816	109.847	2.30387	NA
-Spot 74	166.539	3802.64	3.02602	22.396	4.63594	0.105812	7.37545	0.0171946	2.73951	0.508741	109.901	2.98524	102.127	7.16602	NA	NA	109.901	2.98524	NA
-Spot 34	1139.34	56731.5	1.75934	20.8848	1.06485	0.113598	3.6223	0.0172143	2.55745	0.923173	110.026	2.78998	109.251	3.75196	93.4048	25.2195	110.026	2.78998	NA
-Spot 30	716.225	33333.3	4.94579	21.046	1.12973	0.112847	4.10542	0.0172325	2.97569	0.934891	110.141	3.24963	108.567	4.22713	75.1883	26.8653	110.141	3.24963	NA
-Spot 1	438.773	161708	1.36409	20.3505	1.41968	0.116779	3.61997	0.0172436	2.20028	0.840271	110.212	2.40436	112.148	3.84357	154.441	33.2465	110.212	2.40436	NA
-Spot 20	144.395	8055.59	2.77365	21.3444	1.77484	0.111532	4.00517	0.0172731	2.23033	0.782478	110.399	2.44129	107.366	4.08066	41.649	42.4256	110.399	2.44129	NA
-Spot 90	756.677	126814	5.30976	20.4369	1.15425	0.116836	3.65493	0.0173253	2.50068	0.907947	110.729	2.74534	112.2	3.88238	144.506	27.0756	110.729	2.74534	NA
-Spot 295	273.464	11861.5	2.31745	20.7435	1.963	0.115131	4.05137	0.0173286	2.08837	0.728639	110.75	2.29312	110.648	4.24719	109.506	46.3403	110.75	2.29312	NA
-Spot 125	459.081	43750	1.42177	20.6466	1.57342	0.115784	4.52168	0.0173454	2.94826	0.882227	110.857	3.24041	111.242	4.76431	120.518	37.0886	110.857	3.24041	NA
-Spot 81	680.931	279048	1.86049	20.3589	1.19425	0.117425	3.43924	0.0173462	2.24499	0.882856	110.862	2.46756	112.735	3.66976	153.494	27.9722	110.862	2.46756	NA
-Spot 157	830.022	741167	1.2738	20.1917	0.960465	0.118523	3.44536	0.0173645	2.48489	0.932749	110.978	2.73408	113.732	3.70701	172.751	22.4392	110.978	2.73408	NA
-Spot 220	403.867	137517	1.95826	20.3165	1.03711	0.118028	3.25153	0.0173989	2.21442	0.9056	111.196	2.44123	113.282	3.48539	158.37	24.2578	111.196	2.44123	NA
-Spot 181	159.561	10846.4	1.64614	20.7676	1.85035	0.11552	4.39924	0.0174072	2.54889	0.809247	111.249	2.81128	111.002	4.62582	106.766	43.7409	111.249	2.81128	NA
-Spot 16	251.09	15965	1.09357	20.8202	1.67164	0.115231	4.51222	0.0174078	2.84059	0.861841	111.252	3.1331	110.74	4.73401	100.755	39.5402	111.252	3.1331	NA
-Spot 79	255.691	15433.2	3.11723	20.2252	1.63919	0.118656	4.04479	0.0174129	2.4056	0.826386	111.284	2.65409	113.853	4.35634	168.879	38.2759	111.284	2.65409	NA
-Spot 285	273.209	23680.1	2.24097	20.2795	1.88613	0.118448	4.5837	0.017429	2.69757	0.819541	111.387	2.97893	113.664	4.92903	162.614	44.1125	111.387	2.97893	NA
-Spot 99	883.389	72887.1	3.48095	20.714	1.24659	0.116108	4.41989	0.0174507	3.1733	0.930757	111.524	3.50855	111.537	4.66874	112.86	29.4409	111.524	3.50855	NA
-Spot 40	1250.28	78471.2	4.68002	20.6201	1.03281	0.116697	3.11246	0.0174598	2.07965	0.895632	111.582	2.30055	112.073	3.30264	123.529	24.3177	111.582	2.30055	NA
-Spot 154	535.134	9926.23	2.49385	21.6054	1.37851	0.111658	3.8766	0.0175041	2.49809	0.87554	111.863	2.77032	107.481	3.95369	12.465	33.1311	111.863	2.77032	NA
-Spot 183	411.987	149534	2.15321	20.4745	1.55319	0.118028	3.76774	0.0175341	2.21455	0.81871	112.053	2.46003	113.282	4.03873	140.197	36.4474	112.053	2.46003	NA
-Spot 98	411.929	10979.8	4.20406	21.3708	1.40145	0.113266	3.83701	0.0175633	2.43556	0.866752	112.238	2.70996	108.948	3.96392	38.6488	33.5232	112.238	2.70996	NA
-Spot 238	568.668	32234.4	4.2856	21.1891	1.26929	0.114251	3.43752	0.0175655	2.16823	0.863	112.251	2.41279	109.846	3.57893	59.0825	30.2719	112.251	2.41279	NA
-Spot 303	301.781	10150.5	3.4164	21.2493	1.27877	0.113991	3.95759	0.0175753	2.67882	0.90245	112.314	2.98263	109.61	4.11199	52.3124	30.4986	112.314	2.98263	NA
-Spot 101	488.009	23179.1	2.2787	20.6936	1.4638	0.117066	4.16675	0.0175775	2.70296	0.879334	112.327	3.00987	112.409	4.43388	115.185	34.5412	112.327	3.00987	NA
-Spot 152	150.644	9112.39	2.91927	21.7611	1.98483	0.111332	4.82317	0.0175788	2.83834	0.819505	112.336	3.16085	107.183	4.90617	NA	NA	112.336	3.16085	NA
-Spot 299	432.303	66599.8	5.3606	20.4905	1.32242	0.118522	4.63039	0.0176213	3.30797	0.928551	112.605	3.69259	113.731	4.98201	138.384	31.0377	112.605	3.69259	NA
-Spot 136	655.526	36673.5	2.27309	20.9519	1.18102	0.116045	3.7905	0.0176416	2.60948	0.911037	112.733	2.91618	111.48	4.00195	85.8444	28.0131	112.733	2.91618	NA
-Spot 134	259.87	12219.8	1.8215	20.3357	1.2536	0.120042	4.31622	0.0177125	3.06262	0.925472	113.183	3.4361	115.11	4.69715	156.182	29.3246	113.183	3.4361	NA
-Spot 94	186.791	9231.36	1.78219	21.3699	2.16846	0.114276	4.43156	0.0177193	2.2631	0.722044	113.226	2.54004	109.87	4.6148	38.7453	51.8707	113.226	2.54004	NA
-Spot 293	210.709	16123.1	1.94903	21.3577	1.5994	0.114695	4.09093	0.0177741	2.49153	0.841532	113.573	2.80492	110.251	4.27409	40.1544	38.2401	113.573	2.80492	NA
-Spot 96	1445.55	45962.8	6.44775	20.7798	1.08897	0.118172	3.53019	0.0178175	2.44123	0.913258	113.847	2.75488	113.414	3.78824	105.325	25.7348	113.847	2.75488	NA
-Spot 196	139.801	13207.5	2.89134	20.7662	1.83007	0.119	5.19119	0.0179305	3.36112	0.878255	114.563	3.81661	114.165	5.60557	106.925	43.2175	114.563	3.81661	NA
-Spot 308	220.684	214738	1.67378	14.961	5.81533	0.165987	8.44926	0.0180187	2.63394	0.412583	115.122	3.00532	155.93	12.2138	832.796	121.305	115.122	3.00532	NA
-Spot 193	1074.05	23083.9	22.5165	20.1519	1.31453	0.124452	4.23721	0.0181973	2.92268	0.912001	116.253	3.36724	119.101	4.76184	177.361	30.632	116.253	3.36724	NA
-Spot 159	326.184	8193.51	2.38307	21.8917	1.51232	0.114745	3.56039	0.0182264	2.04807	0.804451	116.437	2.3633	110.296	3.72123	NA	NA	116.437	2.3633	NA
-Spot 67	241.042	11867.7	1.48961	20.9705	2.10313	0.121539	4.30992	0.0184931	2.20679	0.723905	118.125	2.58304	116.466	4.74244	83.7008	49.9276	118.125	2.58304	NA
-Spot 312	200.495	53888.5	2.3606	19.3572	1.44312	0.19168	4.84591	0.0269221	3.40278	0.920629	171.256	5.75074	178.062	7.91465	270.379	33.0752	171.256	5.75074	NA
-Spot 46	291.588	22294.7	1.19128	19.9986	1.21285	0.187868	3.80038	0.027261	2.58753	0.905467	173.383	4.42654	174.809	6.10305	195.175	28.2058	173.383	4.42654	NA
-Spot 118	305.59	461323	1.6222	19.883	1.18447	0.191801	3.30051	0.0276707	2.11605	0.872597	175.953	3.6729	178.165	5.39339	208.596	27.4832	175.953	3.6729	NA
-Spot 307	153.445	5023.29	5.96955	20.6259	3.23789	0.202718	6.64918	0.0303383	3.41128	0.725299	192.665	6.47512	187.423	11.38	122.873	76.3072	192.665	6.47512	NA
-Spot 35	56.9342	28981.6	1.08475	20.4308	2.10407	0.222942	4.21883	0.0330495	2.11476	0.708897	209.606	4.36138	204.355	7.80938	145.21	49.3622	209.606	4.36138	NA
-Spot 19	1033.48	87448.8	1.4486	19.4196	0.994291	0.249315	3.44832	0.0351298	2.45403	0.926816	222.574	5.36883	226.019	6.98748	263.045	22.8188	222.574	5.36883	NA
-Spot 89	503.243	69961.1	3.13607	19.5685	1.15173	0.250649	3.60364	0.0355886	2.45191	0.905118	225.431	5.43183	227.103	7.33346	245.455	26.5158	225.431	5.43183	NA
-Spot 215	37.1863	17188.2	1.30423	18.8488	2.70222	0.263068	5.18821	0.0359782	2.48599	0.677048	227.856	5.56553	237.137	10.9725	331.119	61.2973	227.856	5.56553	NA
-Spot 186	291.442	59663.6	0.897084	19.5354	1.22381	0.262255	4.03086	0.0371735	2.80704	0.916669	235.289	6.48559	236.483	8.50382	249.373	28.1893	235.289	6.48559	NA
-Spot 80	932.724	203264	4.84277	19.3059	0.682798	0.278686	3.22315	0.0390385	2.54035	0.965725	246.87	6.15282	249.615	7.13295	276.511	15.6348	246.87	6.15282	NA
-Spot 211	266.66	61081.9	2.06694	19.1633	1.31006	0.280857	4.61423	0.0390521	3.30417	0.929599	246.955	8.00549	251.337	10.2737	293.453	29.8999	246.955	8.00549	NA
-Spot 198	175.122	201058	1.34772	19.3355	1.55622	0.280178	3.72219	0.0393077	2.16596	0.812116	248.54	5.28085	250.799	8.27182	272.95	35.6659	248.54	5.28085	NA
-Spot 265	290.202	123649	1.5602	18.8519	1.15317	0.36612	3.86992	0.0500801	2.71675	0.920507	315.013	8.35239	316.774	10.5313	330.751	26.1355	315.013	8.35239	NA
-Spot 17	261.602	32156.1	1.20472	18.8633	1.08721	0.384892	3.98158	0.0526798	2.89438	0.936136	330.953	9.33731	330.631	11.2364	329.36	24.6663	330.953	9.33731	NA
-Spot 11	300.559	16167.6	3.14202	17.7117	1.78795	0.443728	4.64973	0.0570248	2.86178	0.848087	357.507	9.95255	372.878	14.5117	470.526	39.5972	357.507	9.95255	NA
-Spot 75	29.8126	159405	1.43094	18.3285	2.57498	0.444099	4.93891	0.0590603	2.36393	0.676272	369.908	8.4982	373.139	15.4233	394.204	57.7625	369.908	8.4982	NA
-Spot 123	486.713	492154	1.57799	18.4107	0.832097	0.447425	2.98407	0.0597694	2.15197	0.932703	374.223	7.82388	375.474	9.36645	384.16	18.6958	374.223	7.82388	NA
-Spot 217	106.894	25103.5	2.23221	17.9176	1.05454	0.477668	3.54515	0.0621002	2.49061	0.920859	388.386	9.38756	396.472	11.6368	444.843	23.445	388.386	9.38756	NA
-Spot 247	371.383	112704	1.11571	18.2154	0.868928	0.498858	2.92895	0.065933	2.06002	0.921387	411.606	8.21415	410.929	9.89856	408.079	19.4416	411.606	8.21415	100.864
-Spot 171	1070.15	122949	22.5591	18.1635	1.17175	0.511222	3.64884	0.0673746	2.47709	0.903964	420.319	10.0795	419.271	12.5339	414.459	26.1889	420.319	10.0795	101.414
-Spot 141	453.273	1.59333e+06	2.71914	17.7692	1.02988	0.530868	4.10835	0.0684449	3.07846	0.948338	426.78	12.7128	432.386	14.4669	463.346	22.8439	426.78	12.7128	92.1082
-Spot 10	267.901	512215	2.20853	17.9439	1.11038	0.562695	3.87036	0.0732619	2.75998	0.927734	455.777	12.145	453.279	14.1517	441.573	24.7097	455.777	12.145	103.217
-Spot 223	543.879	63975.4	1.5957	17.4255	0.965068	0.635939	3.70787	0.0804058	2.7428	0.943312	498.545	13.1587	499.789	14.6363	506.445	21.2292	498.545	13.1587	98.44
-Spot 31	412.883	46454	0.704799	16.9983	0.969913	0.654138	3.6592	0.0806792	2.68929	0.94069	500.175	12.9426	511.022	14.6941	560.771	21.1257	500.175	12.9426	89.1942
-Spot 4	386.254	104291	1.67086	17.4204	1.0507	0.64338	3.77954	0.0813229	2.72884	0.933214	504.014	13.2298	504.397	15.0255	507.07	23.1097	504.014	13.2298	99.3974
-Spot 176	50.0586	31718.2	1.05019	17.0322	1.20757	0.674368	3.87475	0.0833406	2.66719	0.910982	516.032	13.2271	523.365	15.8473	556.441	26.3229	516.032	13.2271	92.738
-Spot 218	123.41	170654	0.645938	17.413	1.22041	0.660835	3.51019	0.0834939	2.28978	0.882482	516.944	11.3747	515.124	14.1826	508.038	26.8491	516.944	11.3747	101.753
-Spot 292	1451.79	210360	12.7312	16.3966	1.05981	0.706133	3.51246	0.0840095	2.45265	0.917966	520.011	12.2532	542.447	14.762	638.839	22.7985	520.011	12.2532	81.3994
-Spot 277	152.749	79007.8	1.22929	16.8559	1.12331	0.689739	3.72929	0.0843575	2.60598	0.918318	522.08	13.0689	532.643	15.458	579.119	24.399	522.08	13.0689	90.1507
-Spot 221	15.2826	9519.29	2.61504	17.0039	2.03802	0.686224	4.88212	0.0846645	2.8441	0.812851	523.905	14.311	530.529	20.1765	560.092	44.4268	523.905	14.311	93.5391
-Spot 209	119.21	16085.1	1.77875	17.1428	1.14777	0.681967	3.24501	0.0848267	2.09724	0.877222	524.868	10.5715	527.962	13.3603	542.313	25.1146	524.868	10.5715	96.7833
-Spot 156	976.998	2.42846e+06	6.20558	16.8688	0.846493	0.698446	3.0869	0.0854878	2.2404	0.935456	528.796	11.3743	537.862	12.8901	577.429	18.383	528.796	11.3743	91.5776
-Spot 149	433.35	273902	1.50799	17.2663	1.08526	0.683991	3.42109	0.0856915	2.33583	0.906895	530.006	11.8848	529.184	14.1102	526.615	23.7935	530.006	11.8848	100.644
-Spot 62	135.454	39372.2	0.732598	16.9026	0.895911	0.716543	2.90132	0.0878789	2.00541	0.91303	542.98	10.443	548.624	12.298	573.056	19.4645	542.98	10.443	94.7517
-Spot 128	116.87	28487.3	2.16348	17.2149	1.23087	0.708561	3.15426	0.0885055	1.92339	0.842291	546.693	10.0815	543.891	13.2831	533.11	26.9496	546.693	10.0815	102.548
-Spot 165	140.116	169387	1.41215	16.9295	1.11971	0.733197	3.14701	0.0900643	2.02731	0.875359	555.917	10.7979	558.428	13.5185	569.643	24.364	555.917	10.7979	97.5905
-Spot 264	647.647	575584	4.99288	16.6832	1.17037	0.754736	3.36859	0.0913611	2.19823	0.88269	563.582	11.8627	570.969	14.7127	601.413	25.3342	563.582	11.8627	93.7096
-Spot 59	128.168	27821.8	128.514	16.6337	1.07458	0.758237	3.35826	0.0915125	2.28369	0.904834	564.476	12.3426	572.993	14.7063	607.843	23.2347	564.476	12.3426	92.8654
-Spot 119	403.236	52895.9	1.61319	16.8559	1.07784	0.752899	3.85255	0.0920822	2.7747	0.932142	567.84	15.0819	569.905	16.8034	579.121	23.3975	567.84	15.0819	98.0519
-Spot 139	454.042	65465	2.70564	16.7661	0.869223	0.762378	3.39594	0.092745	2.52672	0.94561	571.751	13.8244	575.381	14.9174	590.684	18.8359	571.751	13.8244	96.7948
-Spot 65	377.141	1.18157e+07	3.01335	16.9131	1.15902	0.755854	3.75532	0.0927574	2.5963	0.913144	571.824	14.2069	571.615	16.4159	571.724	25.2345	571.824	14.2069	100.018
-Spot 73	157.64	39692.5	0.570671	16.5002	1.19096	0.792931	3.38365	0.094932	2.19269	0.878746	584.64	12.2552	592.833	15.1957	625.233	25.6725	584.64	12.2552	93.5075
-Spot 102	733.925	131968	11.5432	16.6757	1.12472	0.802967	3.48835	0.0971559	2.36363	0.902982	597.72	13.4927	598.501	15.7759	602.382	24.3245	597.72	13.4927	99.226
-Spot 270	257.941	554892	5.23691	16.7387	1.18264	0.829198	4.28932	0.100709	3.10667	0.934573	618.562	18.3236	613.167	19.7456	594.242	25.6093	618.562	18.3236	104.093
-Spot 131	280.081	30012.3	3.31925	16.4257	1.12495	0.859857	2.80237	0.10248	1.67742	0.830522	628.926	10.0514	630.045	13.1561	635.021	24.236	628.926	10.0514	99.0402
-Spot 259	227.78	214569	2.39607	16.2991	1.23603	0.898092	3.75777	0.106211	2.52174	0.897937	650.708	15.6082	650.707	18.0555	651.659	26.5323	650.708	15.6082	99.854
-Spot 29	239.635	202173	3.96635	15.9623	0.98894	0.956405	3.68751	0.110771	2.69857	0.938937	677.224	17.3482	681.432	18.306	696.305	21.0528	677.224	17.3482	97.2596
-Spot 314	418.234	142211	4.81614	15.7471	1.06271	0.986017	3.61224	0.112661	2.54954	0.923025	688.184	16.6415	696.686	18.2119	725.119	22.518	688.184	16.6415	94.9063
-Spot 177	320.899	394650	1.52034	15.7926	0.848681	0.983446	3.6252	0.112691	2.77652	0.956323	688.36	18.1274	695.371	18.2532	719.008	18.0364	688.36	18.1274	95.7375
-Spot 66	235.299	66148.5	2.48992	14.9596	1.22958	1.04303	3.48901	0.113215	2.25943	0.878359	691.393	14.813	725.424	18.0884	833.013	25.6289	691.393	14.813	82.9991
-Spot 189	219.511	38070.2	1.93559	16.0712	1.40374	0.974041	3.44317	0.113583	2.03943	0.823733	693.524	13.4097	690.544	17.2525	681.763	29.9916	693.524	13.4097	101.725
-Spot 126	212.607	27580.8	2.07957	15.8529	1.29207	1.01098	3.49851	0.116289	2.20644	0.862931	709.167	14.8174	709.367	17.8604	710.91	27.4461	709.167	14.8174	99.7547
-Spot 107	124.914	38594.2	2.02557	15.8284	1.06913	1.02909	3.39215	0.118189	2.32302	0.90841	720.133	15.8283	718.471	17.4703	714.189	22.7347	720.133	15.8283	100.832
-Spot 155	30.1483	24272.5	1.30419	15.1372	1.43359	1.10473	3.56075	0.121336	2.12717	0.829255	738.25	14.838	755.636	18.9794	808.331	29.9994	738.25	14.838	91.3302
-Spot 36	225.31	29693.2	1.57165	15.3613	0.937094	1.09316	3.56033	0.121843	2.62323	0.941716	741.163	18.3664	750.038	18.8821	777.5	19.7066	741.163	18.3664	95.3264
-Spot 148	68.3876	10742.4	2.60372	15.7816	1.26561	1.06443	3.31944	0.121886	2.05383	0.851341	741.409	14.3843	736.003	17.3802	720.489	26.8418	741.409	14.3843	102.904
-Spot 226	553.206	442821	0.469122	14.9261	0.862853	1.14748	3.66791	0.124274	2.80505	0.955802	755.117	19.988	776.054	19.9031	837.656	17.9628	755.117	19.988	90.1464
-Spot 213	392.686	266909	1.90887	15.3978	0.791342	1.1134	3.10381	0.124393	2.31247	0.946135	755.802	16.492	759.809	16.6048	772.513	16.6549	755.802	16.492	97.8368
-Spot 33	138.652	200288	1.18816	15.565	1.08793	1.10683	2.97103	0.125003	1.88311	0.865884	759.296	13.4884	756.65	15.8499	749.738	22.9811	759.296	13.4884	101.275
-Spot 197	308.268	1.06857e+06	1.08536	15.4701	1.02925	1.13489	3.89702	0.12739	2.86777	0.941216	772.96	20.8894	770.084	21.038	762.646	21.6966	772.96	20.8894	101.352
-Spot 216	122.247	28414.7	1.20971	15.4296	0.977676	1.14587	3.0622	0.128285	2.08453	0.905367	778.075	15.2786	775.29	16.6048	768.175	20.5904	778.075	15.2786	101.289
-Spot 253	90.6532	26713.3	1.05472	15.0043	1.09839	1.17977	3.94402	0.12844	2.84562	0.932914	778.961	20.8795	791.205	21.6781	826.772	22.9371	778.961	20.8795	94.2172
-Spot 184	152.242	37342.6	5.56785	14.8921	1.28317	1.19029	4.33726	0.128617	3.05409	0.921933	779.972	22.4364	796.096	23.9374	842.433	26.6996	779.972	22.4364	92.5857
-Spot 85	37.4655	14600.5	1.80564	15.4837	1.24967	1.15723	3.63946	0.130012	2.38979	0.886155	787.935	17.7248	780.654	19.8265	760.794	26.3305	787.935	17.7248	103.568
-Spot 232	698.409	717568	6.11845	15.1716	1.1239	1.18117	4.35156	0.130026	3.22766	0.944385	788.013	23.9414	791.858	23.9319	803.588	23.5357	788.013	23.9414	98.0618
-Spot 21	321.079	71257.4	0.817977	15.1864	1.24212	1.18063	4.06876	0.130093	2.82664	0.915507	788.395	20.9764	791.604	22.3714	801.545	26.0401	788.395	20.9764	98.3594
-Spot 97	58.6305	14186.1	0.938988	15.4914	1.12972	1.15921	3.39607	0.130299	2.26635	0.894973	789.57	16.842	781.585	18.5149	759.75	23.8059	789.57	16.842	103.925
-Spot 274	211.462	75168.3	1.57819	15.2785	0.941363	1.1762	3.21723	0.130392	2.27586	0.92407	790.103	16.9234	789.543	17.6579	788.859	19.7596	790.103	16.9234	100.158
-Spot 104	47.8099	19831.3	1.22642	14.9207	1.27219	1.20817	3.97229	0.130799	2.7001	0.904618	792.424	20.1335	804.352	22.0717	838.41	26.4943	792.424	20.1335	94.515
-Spot 3	60.3472	45450.7	1.96019	15.2142	1.32262	1.19759	3.88614	0.132204	2.56352	0.88869	800.426	19.2964	799.472	21.5067	797.707	27.7249	800.426	19.2964	100.341
-Spot 208	177.279	96558.7	1.0405	15.0277	0.892833	1.22184	2.97274	0.133228	2.0799	0.918914	806.254	15.7631	810.618	16.6007	823.548	18.6575	806.254	15.7631	97.9001
-Spot 313	135.51	73291.6	1.36419	14.8224	1.1204	1.24184	4.02727	0.133559	2.90686	0.93309	808.135	22.0787	819.718	22.6555	852.185	23.273	808.135	22.0787	94.8309
-Spot 200	105.448	31101.7	1.51249	15.1427	1.13788	1.23293	3.67583	0.135466	2.53795	0.912485	818.971	19.519	815.673	20.6115	807.578	23.8131	818.971	19.519	101.411
-Spot 93	376.415	1.99969e+06	2.23326	14.4615	1.00095	1.29274	3.4227	0.135648	2.42175	0.924172	820.004	18.6473	842.512	19.5979	903.173	20.6342	820.004	18.6473	90.7915
-Spot 288	361.574	1.19277e+06	10.2462	14.4668	1.07038	1.29578	4.08724	0.136017	3.01686	0.942439	822.099	23.2854	843.857	23.4282	902.412	22.0869	822.099	23.2854	91.1001
-Spot 239	215.061	76147	10.4733	14.7109	1.08558	1.30023	3.52992	0.138786	2.44434	0.913922	837.793	19.2037	845.822	20.2629	867.831	22.4941	837.793	19.2037	96.5388
-Spot 124	104.066	25420.7	1.25087	14.5241	1.13418	1.32299	3.83277	0.139423	2.6986	0.921889	841.399	21.2866	855.822	22.1678	894.261	23.4325	841.399	21.2866	94.0887
-Spot 227	82.444	63475.5	1.05236	14.8558	1.17177	1.30229	3.46564	0.140376	2.29387	0.890537	846.787	18.2026	846.732	19.9075	847.504	24.359	846.787	18.2026	99.9154
-Spot 108	47.6688	30275.8	0.834971	14.9623	1.32861	1.29562	4.06172	0.140658	2.73311	0.899366	848.385	21.7264	843.787	23.2806	832.604	27.6956	848.385	21.7264	101.895
-Spot 244	156.791	229317	2.22018	14.6415	1.28556	1.3442	3.87911	0.142802	2.59355	0.895972	860.49	20.892	865.048	22.5893	877.659	26.5888	860.49	20.892	98.0439
-Spot 69	138.276	63698.6	2.17478	14.8325	1.09159	1.36506	3.43449	0.146911	2.3429	0.906444	883.622	19.3462	874.045	20.1307	850.758	22.6776	883.622	19.3462	103.863
-Spot 188	114.896	683724	0.932323	14.4447	1.07979	1.44796	3.3763	0.151758	2.29651	0.904958	910.812	19.5064	909.026	20.2806	905.568	22.2509	905.568	22.2509	100.579
-Spot 109	540.555	256503	2.64279	14.363	0.771676	1.42015	3.07609	0.148002	2.30442	0.948246	889.755	19.1516	897.427	18.3303	917.284	15.882	917.284	15.882	96.9988
-Spot 246	81.9129	162859	2.62459	14.3066	1.35108	1.52174	4.21836	0.157967	2.86728	0.904603	945.466	25.2151	939.177	25.8528	925.335	27.7752	925.335	27.7752	102.176
-Spot 281	320.13	59273.3	1.55042	14.2415	1.11795	1.58791	3.46795	0.164085	2.35	0.903024	979.436	21.3536	965.477	21.6095	934.701	22.9335	934.701	22.9335	104.786
-Spot 38	320.279	62768.6	0.8648	14.2114	0.951337	1.50625	3.27916	0.155318	2.32782	0.92568	930.705	20.1739	932.922	20.0134	939.037	19.483	939.037	19.483	99.1127
-Spot 163	178.05	404872	2.35005	14.2094	0.945447	1.51069	2.90641	0.155754	1.96096	0.900772	933.139	17.0358	934.72	17.7588	939.322	19.3607	939.322	19.3607	99.3417
-Spot 122	130.971	60344.2	1.89947	14.1987	1.01087	1.56892	3.14689	0.161635	2.13602	0.90389	965.859	19.1598	957.999	19.5171	940.907	20.7175	940.907	20.7175	102.652
-Spot 231	173.191	302580	0.663239	14.1597	0.963147	1.5477	2.81646	0.159011	1.85331	0.88733	951.28	16.3911	949.576	17.3746	946.519	19.7317	946.519	19.7317	100.503
-Spot 212	144.966	46386.3	4.86289	14.1572	1.29182	1.60169	3.14892	0.16453	1.8571	0.820922	981.9	16.9141	970.869	19.6865	946.861	26.4499	946.861	26.4499	103.701
-Spot 106	225.319	105819	3.47701	14.1355	0.913996	1.53453	2.97891	0.157389	2.06492	0.914426	942.252	18.1016	944.316	18.3153	950.025	18.7052	950.025	18.7052	99.1818
-Spot 56	324.291	55445.8	2.37639	14.1119	1.09976	1.56938	3.95345	0.160695	2.8537	0.933106	960.636	25.469	958.182	24.524	953.446	22.5138	953.446	22.5138	100.754
-Spot 170	36.6831	8897.42	1.22299	14.095	1.22803	1.63714	3.75365	0.167432	2.52562	0.899326	997.946	23.3505	984.611	23.6655	955.87	25.1293	955.87	25.1293	104.402
-Spot 70	118.665	34103.4	0.937524	14.0759	1.06901	1.56367	3.44227	0.159701	2.37326	0.911771	955.118	21.0682	955.921	21.3217	958.639	21.8363	958.639	21.8363	99.6327
-Spot 71	308.173	121581	2.35278	14.0392	0.986461	1.52749	3.26122	0.1556	2.27475	0.917448	932.279	19.745	941.491	20.015	964.012	20.1478	964.012	20.1478	96.7083
-Spot 269	111.115	38349.7	1.95972	14.0215	0.991535	1.58225	3.5827	0.160975	2.59117	0.933956	962.193	23.1607	963.255	22.294	966.569	20.2489	966.569	20.2489	99.5473
-Spot 180	103.833	287500	2.01449	14.0179	1.37049	1.39781	3.67714	0.142173	2.30666	0.859706	856.941	18.5092	888.009	21.7691	967.106	27.9898	967.106	27.9898	88.6088
-Spot 179	151.414	101029	3.87517	13.9805	0.990257	1.63706	3.191	0.166064	2.20074	0.911934	990.388	20.2042	984.58	20.1168	972.523	20.1971	972.523	20.1971	101.837
-Spot 2	255.095	291923	2.37546	13.9665	0.968488	1.62652	3.34242	0.16483	2.37394	0.925911	983.563	21.6552	980.515	21.02	974.564	19.7646	974.564	19.7646	100.923
-Spot 146	780.884	311410	2.55724	13.9652	0.971142	1.51841	3.17636	0.15386	2.20522	0.915186	922.562	18.9558	937.835	19.448	974.771	19.8149	974.771	19.8149	94.6439
-Spot 47	219.773	182031	3.65732	13.9597	1.04497	1.61124	3.51943	0.163201	2.47447	0.921224	974.543	22.3805	974.59	22.0538	975.585	21.3206	975.585	21.3206	99.8932
-Spot 120	162.223	185243	2.43158	13.9416	1.01312	1.58174	3.32042	0.160005	2.3073	0.915621	956.807	20.5163	963.054	20.6588	978.215	20.6438	978.215	20.6438	97.8115
-Spot 203	98.624	22316.3	0.736676	13.9387	1.10577	1.63423	4.1522	0.165282	3.04643	0.939994	986.061	27.8552	983.491	26.1616	978.626	22.5315	978.626	22.5315	100.76
-Spot 224	267.391	74814.1	3.19745	13.9113	1.02131	1.63913	3.62403	0.16545	2.60272	0.930896	986.994	23.8189	985.377	22.8585	982.682	20.7779	982.682	20.7779	100.439
-Spot 63	82.8097	31306.7	2.36715	13.9043	1.0891	1.65121	3.38036	0.166586	2.29126	0.903162	993.274	21.0919	990.014	21.3804	983.703	22.1536	983.703	22.1536	100.973
-Spot 207	205.986	50617	1.82055	13.8984	1.23255	1.47674	3.52467	0.148922	2.29212	0.880739	894.916	19.1525	920.895	21.342	984.549	25.0907	984.549	25.0907	90.8961
-Spot 77	516.887	144363	0.910811	13.8961	0.988292	1.58654	4.1225	0.159967	3.1342	0.95371	956.592	27.8633	964.938	25.6811	984.868	20.0992	984.868	20.0992	97.129
-Spot 117	274.389	2.28008e+06	1.40073	13.8907	1.13158	1.67914	3.23828	0.169238	2.1067	0.880958	1007.91	19.6569	1000.65	20.6108	985.662	23.0129	985.662	23.0129	102.257
-Spot 309	244.418	48011.9	1.69452	13.8863	1.04481	1.66272	3.15257	0.16753	2.10777	0.895965	998.488	19.497	994.414	19.9915	986.304	21.2446	986.304	21.2446	101.235
-Spot 233	503.306	118361	1.13973	13.8208	0.997184	1.66531	3.70294	0.166999	2.70576	0.938307	995.555	24.9605	995.399	23.4964	995.936	20.2643	995.936	20.2643	99.9618
-Spot 287	151.071	111376	3.60861	13.7757	0.896358	1.7216	3.47637	0.172081	2.58001	0.944615	1023.57	24.4184	1016.62	22.3323	1002.55	18.1971	1002.55	18.1971	102.096
-Spot 174	311.607	226770	4.12718	13.7238	1.03565	1.55214	4.10313	0.154558	3.06747	0.947457	926.466	26.4715	951.346	25.3432	1010.22	21	1010.22	21	91.7096
-Spot 222	486.908	112131	3.14838	13.7135	0.828711	1.68572	2.98224	0.167735	2.15353	0.933283	999.618	19.9411	1003.15	19.0086	1011.73	16.8002	1011.73	16.8002	98.8025
-Spot 42	374.111	287996	3.09419	13.6187	0.954218	1.68441	3.11612	0.166445	2.1619	0.914849	992.496	19.8867	1002.65	19.8563	1025.79	19.3217	1025.79	19.3217	96.7548
-Spot 115	879.004	164896	1.12229	13.5219	0.863186	1.80714	2.9572	0.177303	2.09401	0.924531	1052.23	20.3295	1048.04	19.3326	1040.19	17.4434	1040.19	17.4434	101.157
-Spot 83	361.954	105632	1.09313	13.4776	0.94709	1.77316	3.49937	0.1734	2.55229	0.937533	1030.82	24.3138	1035.68	22.723	1046.85	19.1163	1046.85	19.1163	98.4683
-Spot 315	72.4208	134858	1.68304	13.4263	1.28532	1.66877	3.87837	0.162571	2.59304	0.895969	971.047	23.3751	996.72	24.6292	1054.54	25.9081	1054.54	25.9081	92.0829
-Spot 279	306.404	63605.2	5.4198	13.4119	1.2165	1.87162	4.33639	0.182136	3.11989	0.93168	1078.63	30.9877	1071.1	28.7055	1056.7	24.4965	1056.7	24.4965	102.076
-Spot 41	212.45	67961.6	1.97604	13.4092	0.717558	1.83587	2.62234	0.178621	1.90478	0.935801	1059.44	18.609	1058.38	17.2392	1057.1	14.4667	1057.1	14.4667	100.221
-Spot 310	128.971	79883.7	3.69635	13.3974	0.930423	1.71753	3.60603	0.16696	2.67561	0.944521	995.339	24.6774	1015.1	23.1454	1058.88	18.7303	1058.88	18.7303	93.9991
-Spot 294	365.514	69032.4	6.79798	13.395	1.05011	1.62232	3.68084	0.157676	2.63073	0.928742	943.851	23.0981	978.889	23.1261	1059.24	21.1552	1059.24	21.1552	89.1067
-Spot 55	299.614	103864	8.5808	13.3894	0.954872	1.82665	3.30572	0.177462	2.35084	0.926488	1053.09	22.8403	1055.08	21.6943	1060.08	19.2215	1060.08	19.2215	99.341
-Spot 251	123.191	4.00503e+06	2.75233	13.3824	1.0696	1.81251	3.92927	0.175996	2.85967	0.936628	1045.07	27.5889	1049.99	25.717	1061.13	21.526	1061.13	21.526	98.4861
-Spot 297	55.0194	32559.6	0.941708	13.3676	1.47582	1.85081	3.75543	0.179516	2.27961	0.839439	1064.33	22.3656	1063.72	24.7611	1063.36	29.6879	1063.36	29.6879	100.092
-Spot 248	45.7536	86562.2	2.27797	13.3468	1.29081	1.66108	3.77252	0.160863	2.48171	0.887169	961.569	22.1689	993.788	23.9152	1066.49	25.9536	1066.49	25.9536	90.162
-Spot 249	435.522	683534	5.07615	13.2936	0.904103	1.79373	3.93665	0.173016	3.03254	0.958317	1028.71	28.8344	1043.18	25.6697	1074.51	18.137	1074.51	18.137	95.7372
-Spot 138	206.265	90865.6	2.32397	13.2673	0.872232	1.88952	2.97108	0.181895	2.09885	0.923434	1077.32	20.823	1077.41	19.7299	1078.46	17.497	1078.46	17.497	99.894
-Spot 86	30.8146	29662.7	1.30973	13.06	1.28856	2.03144	3.8624	0.192502	2.57383	0.894198	1134.91	26.784	1126.1	26.2868	1109.99	25.722	1109.99	25.722	102.246
-Spot 110	258.617	46943.3	2.59588	13.0584	1.08839	1.96785	3.33833	0.186454	2.24993	0.900204	1102.14	22.7935	1104.57	22.4792	1110.22	21.728	1110.22	21.728	99.2717
-Spot 296	526.51	149191	4.54145	13.0512	0.784531	1.81847	3.28269	0.172205	2.49816	0.95406	1024.25	23.6583	1052.14	21.5089	1111.33	15.6492	1111.33	15.6492	92.1646
-Spot 182	537.793	248475	14.213	13.0383	0.830486	1.71574	3.42211	0.162316	2.59163	0.9523	969.635	23.3308	1014.43	21.9561	1113.3	16.5841	1113.3	16.5841	87.0953
-Spot 286	163.591	57138.4	1.10897	12.795	0.903491	2.08256	3.35831	0.193342	2.45482	0.938457	1139.46	25.6391	1143.08	23.0416	1150.84	17.9329	1150.84	17.9329	99.0109
-Spot 44	154.853	115613	2.17053	12.7914	1.09602	2.21183	3.36172	0.205285	2.2657	0.900203	1203.65	24.8766	1184.79	23.5109	1151.41	21.7789	1151.41	21.7789	104.537
-Spot 250	118.931	47063.3	2.01212	12.7863	1.1773	2.1661	3.75552	0.20096	2.57822	0.90965	1180.48	27.8114	1170.23	26.0946	1152.16	23.3803	1152.16	23.3803	102.457
-Spot 210	267.101	210755	1.72172	12.749	0.894714	2.10026	2.70392	0.194285	1.8092	0.896378	1144.54	18.9731	1148.89	18.6014	1157.95	17.7526	1157.95	17.7526	98.8421
-Spot 278	213.267	630063	2.70543	12.7271	0.88882	2.09421	3.32821	0.193391	2.43939	0.939574	1139.72	25.4833	1146.91	22.8762	1161.37	17.6211	1161.37	17.6211	98.136
-Spot 236	168.038	56962.5	1.48704	12.7259	0.946567	2.24679	3.38188	0.207463	2.43531	0.932069	1215.29	26.9737	1195.78	23.767	1161.55	18.7829	1161.55	18.7829	104.626
-Spot 219	107.002	72723.9	1.95807	12.6488	1.13552	2.23414	2.8777	0.205044	1.74218	0.837762	1202.36	19.1099	1191.82	20.1876	1173.63	22.4631	1173.63	22.4631	102.448
-Spot 172	58.4737	406347	1.24656	12.6178	1.02117	2.26811	3.55538	0.207651	2.5342	0.927528	1216.29	28.0902	1202.43	25.0594	1178.49	20.2056	1178.49	20.2056	103.208
-Spot 48	770.9	294538	1.62289	12.5057	1.06172	2.11149	3.48738	0.191595	2.42566	0.916088	1130.01	25.1423	1152.56	24.0343	1196.07	20.9364	1196.07	20.9364	94.4764
-Spot 127	59.6075	23491.5	1.57923	12.4402	0.933135	2.30955	3.7249	0.20847	2.79176	0.948423	1220.66	31.0461	1215.22	26.3998	1206.45	18.3594	1206.45	18.3594	101.178
-Spot 199	9.96261	3972.05	1.16643	12.2232	2.01635	2.48563	4.26044	0.22045	2.24409	0.743843	1284.25	26.1307	1267.86	30.8584	1241.02	39.5198	1241.02	39.5198	103.483
-Spot 245	97.774	68446.4	1.34481	11.5828	1.08737	2.82305	3.56935	0.237258	2.48199	0.915954	1372.43	30.6818	1361.68	26.7688	1345.67	20.9967	1345.67	20.9967	101.988
-Spot 144	51.4498	13553.5	1.19103	11.5297	1.40719	2.66671	3.7758	0.22309	2.36861	0.859723	1298.18	27.8507	1319.28	27.8899	1354.54	27.1409	1354.54	27.1409	95.8391
-Spot 289	325.205	170136	1.76862	11.3256	1.06032	2.77742	3.56696	0.228239	2.50664	0.920991	1325.26	30.0275	1349.49	26.6363	1388.91	20.3517	1388.91	20.3517	95.4177
-Spot 39	32.3747	9026.52	0.953832	10.7483	1.20241	3.4625	2.91249	0.270033	1.71008	0.818026	1540.97	23.439	1518.72	22.9499	1488.64	22.7702	1488.64	22.7702	103.515
-Spot 192	68.9958	70570	1.5392	10.5375	0.985789	3.35473	3.58071	0.256498	2.59492	0.934817	1471.9	34.1482	1493.9	28.0159	1526.05	18.5736	1526.05	18.5736	96.4515
-Spot 145	189.493	63221.5	1.24632	10.1743	0.883584	3.78613	2.91517	0.279504	2.03159	0.917023	1588.87	28.6091	1589.81	23.4198	1591.85	16.506	1591.85	16.506	99.8126
-Spot 254	119.163	51469.5	2.99081	10.1177	1.00318	3.65184	3.48698	0.268091	2.4838	0.927228	1531.11	33.851	1560.91	27.8019	1602.26	18.7133	1602.26	18.7133	95.5589
-Spot 100	176.069	1.72255e+06	1.42737	10.1147	0.859699	3.93318	3.34109	0.288659	2.4814	0.944897	1634.83	35.8316	1620.54	27.0544	1602.82	16.0369	1602.82	16.0369	101.997
-Spot 140	158.765	78944	2.21667	10.0279	1.02163	3.89646	3.57496	0.283509	2.55333	0.928439	1609.01	36.3578	1612.95	28.8939	1618.89	19.0165	1618.89	19.0165	99.39
-Spot 302	214.04	139809	0.712631	9.99927	0.990178	3.76133	3.1026	0.272896	2.11242	0.905462	1555.49	29.1949	1584.53	24.8918	1624.2	18.4183	1624.2	18.4183	95.7693
-Spot 206	430.61	161825	1.82865	9.99278	0.911034	3.79796	3.65338	0.275375	2.74235	0.949003	1568.03	38.1709	1592.31	29.3724	1625.41	16.9433	1625.41	16.9433	96.4697
-Spot 185	229.162	143005	2.19381	9.97133	0.736498	3.13021	2.57761	0.226472	1.84111	0.928468	1315.98	21.9158	1440.15	19.8383	1629.4	13.6899	1629.4	13.6899	80.7646
-Spot 262	137.943	77167.5	0.957904	9.91702	0.947301	3.83736	3.21653	0.276122	2.26923	0.922818	1571.8	31.6525	1600.62	25.9141	1639.55	17.5875	1639.55	17.5875	95.8679
-Spot 88	237.746	609346	2.42228	9.79793	1.10727	4.0896	3.83233	0.290739	2.72506	0.926441	1645.22	39.5699	1652.23	31.2771	1661.95	20.4971	1661.95	20.4971	98.9936
-Spot 187	204.553	364635	5.24867	9.7121	1.01703	3.91573	3.3089	0.27594	2.29187	0.914045	1570.88	31.9518	1616.94	26.7694	1678.22	18.7874	1678.22	18.7874	93.6042
-Spot 167	162.34	48751.8	2.55169	9.64895	0.672859	4.13441	3.02938	0.289456	2.35652	0.961571	1638.81	34.1011	1661.13	24.7738	1690.26	12.4115	1690.26	12.4115	96.9561
-Spot 255	199.203	130787	1.79562	9.58504	0.984615	4.08983	3.37282	0.284438	2.38821	0.92451	1613.67	34.0932	1652.28	27.5253	1702.51	18.1326	1702.51	18.1326	94.7822
-Spot 280	269.726	82753.2	181.315	9.54485	0.950279	4.22492	3.61637	0.292601	2.66609	0.941954	1654.51	38.9054	1678.88	29.7006	1710.24	17.4832	1710.24	17.4832	96.7417
-Spot 166	49.8525	63333.6	1.35342	9.52364	1.17651	4.33091	3.24341	0.299274	2.0669	0.86907	1687.71	30.6909	1699.27	26.7615	1714.33	21.6349	1714.33	21.6349	98.4471
-Spot 64	368.59	957252	1.81637	9.43489	0.795346	4.34407	2.90333	0.297387	2.10798	0.935619	1678.34	31.1488	1701.77	23.968	1731.53	14.5932	1731.53	14.5932	96.9281
-Spot 158	331.164	1.0696e+06	1.41318	9.43255	0.922769	4.33249	3.4492	0.29652	2.52643	0.939307	1674.03	37.2482	1699.57	28.4623	1731.98	16.9306	1731.98	16.9306	96.6538
-Spot 103	255.714	519609	1.46719	9.4154	0.950556	4.49979	3.15527	0.307411	2.20472	0.918287	1727.95	33.4181	1730.93	26.2186	1735.32	17.4332	1735.32	17.4332	99.5753
-Spot 68	421.622	362845	2.20095	9.27456	1.05823	4.61512	4.1651	0.310573	3.10687	0.946597	1743.53	47.4627	1752.01	34.7736	1762.92	19.3416	1762.92	19.3416	98.9002
-Spot 49	833.922	415860	19.9173	9.27427	1.07321	4.67585	3.34015	0.31465	2.26695	0.903832	1763.55	34.9769	1762.93	27.947	1762.97	19.6153	1762.97	19.6153	100.033
-Spot 132	307.881	487973	13.2243	9.14753	1.24354	4.83112	4.47887	0.320656	3.23533	0.933424	1792.93	50.6402	1790.33	37.6959	1788.08	22.6586	1788.08	22.6586	100.271
-Spot 252	246.431	258928	1.10217	9.05055	1.03706	4.81256	4.21213	0.316038	3.17507	0.950579	1770.35	49.1531	1787.1	35.4256	1807.48	18.8507	1807.48	18.8507	97.9458
-Spot 105	69.6773	70995.8	0.988124	8.8748	0.890305	5.10962	3.9614	0.32903	3.0711	0.960455	1833.68	49.014	1837.71	33.6521	1843.05	16.1127	1843.05	16.1127	99.4917
-Spot 26	255.041	190427	2.30376	8.81498	0.858579	5.36669	3.50677	0.343254	2.64819	0.951254	1902.31	43.6246	1879.55	30.0231	1855.27	15.5154	1855.27	15.5154	102.535
-Spot 151	435.461	437953	9.09124	8.80775	1.00108	4.536	3.22963	0.289885	2.22855	0.912192	1640.95	32.2863	1737.6	26.8757	1856.76	18.0877	1856.76	18.0877	88.3774
-Spot 240	140.295	121483	1.7087	8.79256	1.11622	5.40599	3.41304	0.344888	2.29682	0.899413	1910.14	37.9702	1885.8	29.2537	1859.88	20.1608	1859.88	20.1608	102.703
-Spot 272	81.8975	76697.1	1.0976	8.76838	1.01389	5.34687	3.04162	0.340178	2.02773	0.894422	1887.53	33.18	1876.39	26.0238	1864.85	18.3014	1864.85	18.3014	101.216
-Spot 8	375.827	278528	4.56465	8.75201	0.979003	5.35562	3.40897	0.340099	2.42997	0.92755	1887.15	39.7551	1877.79	29.1759	1868.22	17.6644	1868.22	17.6644	101.013
-Spot 7	275.768	112097	3.53219	8.7334	1.03109	5.2698	2.85945	0.333938	1.82836	0.871037	1857.44	29.5061	1863.98	24.4083	1872.06	18.5939	1872.06	18.5939	99.219
-Spot 24	569.895	670949	8.52356	8.69548	0.796793	5.10029	3.22835	0.321792	2.43156	0.95028	1798.48	38.161	1836.15	27.4132	1879.91	14.356	1879.91	14.356	95.6685
-Spot 153	474.77	494641	52.2271	8.67572	1.1689	4.91725	3.347	0.309539	2.1781	0.881133	1738.44	33.1892	1805.22	28.2488	1884	21.0513	1884	21.0513	92.2736
-Spot 78	165.762	71707.4	2.90009	8.56224	0.954133	5.38618	3.26452	0.334623	2.31039	0.924284	1860.75	37.3427	1882.66	27.964	1907.68	17.1363	1907.68	17.1363	97.54
-Spot 92	760.561	2.55179e+06	5.44702	8.47207	0.874273	4.99633	3.00836	0.307135	2.13409	0.925359	1726.59	32.3254	1818.7	25.4576	1926.67	15.6646	1926.67	15.6646	89.6152
-Spot 168	571.798	246799	10.0064	8.16312	0.885655	5.82483	3.14684	0.345006	2.26119	0.931125	1910.71	37.3906	1950.11	27.2773	1992.97	15.7455	1992.97	15.7455	95.8723
-Spot 50	593.497	399899	3.58258	8.13474	1.09465	5.19826	4.33976	0.306824	3.24512	0.947544	1725.06	49.1167	1852.33	36.9723	1999.16	19.4478	1999.16	19.4478	86.2892
-Spot 300	100.499	153027	1.51204	8.11409	1.00707	6.20947	3.24801	0.36558	2.24094	0.912127	2008.57	38.6739	2005.78	28.4126	2003.67	17.8823	2003.67	17.8823	100.244
-Spot 15	323.552	1.63688e+06	2.73907	8.09422	0.887746	5.97506	3.13624	0.350918	2.24849	0.930129	1938.98	37.6522	1972.22	27.2859	2008.02	15.7552	2008.02	15.7552	96.5616
-Spot 242	145.089	73458.7	1.95189	8.03298	0.838928	6.17272	3.632	0.359783	2.79307	0.957731	1981.15	47.6409	2000.59	31.7475	2021.5	14.8676	2021.5	14.8676	98.0041
-Spot 60	47.2348	120688	1.76442	7.96559	1.17067	6.00512	3.12408	0.347078	1.95342	0.857761	1920.63	32.4453	1976.59	27.1996	2036.41	20.7095	2036.41	20.7095	94.3145
-Spot 195	500.679	562749	7.02826	7.82061	1.27244	5.5672	3.38331	0.315911	2.11087	0.856432	1769.73	32.6679	1911.04	29.1304	2068.84	22.427	2068.84	22.427	85.542
-Spot 263	201.351	470084	10.4329	7.72003	1.06545	6.1995	3.94245	0.347267	2.877	0.93776	1921.53	47.8053	2004.38	34.484	2091.63	18.7298	2091.63	18.7298	91.868
-Spot 225	678.007	390806	10.182	7.5742	1.12352	7.30275	4.02205	0.401338	2.89853	0.932405	2175.2	53.5147	2149.15	35.9354	2125.09	19.6767	2125.09	19.6767	102.358
-Spot 113	251.276	364693	2.26792	7.48072	0.974563	7.24413	3.56862	0.393203	2.59406	0.936116	2137.67	47.1963	2141.95	31.8503	2146.81	17.0262	2146.81	17.0262	99.5741
-Spot 43	309.052	205895	3.66021	7.24651	1.35821	7.90213	4.32327	0.41549	2.96506	0.909155	2239.97	56.107	2219.92	38.9857	2202.21	23.5835	2202.21	23.5835	101.715
-Spot 291	120.403	250151	1.61857	7.17592	0.943035	6.73846	3.3036	0.350854	2.36057	0.928638	1938.67	39.5237	2077.68	29.2175	2219.2	16.3448	2219.2	16.3448	87.3593
-Spot 267	224.788	92661.9	0.917355	7.11285	1.17883	7.6655	3.60181	0.395614	2.42298	0.899223	2148.81	44.2774	2192.57	32.3627	2234.48	20.3987	2234.48	20.3987	96.1661
-Spot 57	314.112	802846	2.84271	6.96552	0.795672	7.98477	3.39956	0.403556	2.60389	0.956348	2185.39	48.264	2229.31	30.686	2270.63	13.714	2270.63	13.714	96.2464
-Spot 306	80.7307	47989.6	1.3758	6.91008	1.02189	6.88032	3.45434	0.344968	2.43245	0.921947	1910.53	40.2194	2096.12	30.6332	2284.39	17.5905	2284.39	17.5905	83.6339
-Spot 37	354.788	3.81827e+06	1.41998	6.79086	1.14957	8.82076	3.30565	0.434629	2.15607	0.882409	2326.55	42.1082	2319.64	30.1561	2314.3	19.7235	2314.3	19.7235	100.53
-Spot 52	342.931	87677.2	19.3392	6.74185	1.97956	6.94366	5.90922	0.339668	3.92965	0.893083	1885.07	64.231	2104.25	52.4946	2326.72	33.921	2326.72	33.921	81.0187
-Spot 95	256.477	199423	2.13095	6.60229	1.08973	8.06374	4.37734	0.386295	3.28761	0.949214	2105.62	59.0573	2238.19	39.563	2362.49	18.605	2362.49	18.605	89.1272
-Spot 137	167.73	132855	1.74742	6.45826	1.04734	7.76592	3.47707	0.363912	2.42973	0.918318	2000.69	41.7919	2204.27	31.2879	2400.07	17.8093	2400.07	17.8093	83.3598
-Spot 260	172.003	123285	1.47265	6.2308	0.98456	9.67798	2.93538	0.437539	1.95082	0.892746	2339.61	38.277	2404.61	27.0205	2460.85	16.638	2460.85	16.638	95.0734
-Spot 256	14.7759	148756	1.2102	6.20686	1.05398	10.0863	2.98116	0.454245	1.92719	0.877362	2414.1	38.8061	2442.71	27.5465	2467.35	17.7997	2467.35	17.7997	97.8417
-Spot 311	409.294	199199	2.62695	6.19008	0.82568	9.24662	4.45664	0.415305	3.63096	0.975106	2239.13	68.6867	2362.74	40.8577	2471.92	13.9371	2471.92	13.9371	90.5826
-Spot 237	758.988	356194	3.53853	6.16457	1.09239	10.4465	3.2869	0.467264	2.19451	0.895219	2471.55	45.0522	2475.19	30.4681	2478.89	18.4274	2478.89	18.4274	99.7041
-Spot 160	100.719	76961	0.727932	6.15184	0.897847	10.5849	2.79104	0.472475	1.89319	0.90354	2494.41	39.1606	2487.38	25.8991	2482.38	15.1425	2482.38	15.1425	100.485
-Spot 6	387.361	711036	2.1462	6.12881	0.958459	9.3704	3.42331	0.416699	2.46485	0.932017	2245.47	46.737	2374.94	31.4179	2488.7	16.1545	2488.7	16.1545	90.2269
-Spot 290	170.534	72033.6	2.54063	6.10193	1.14444	10.9536	3.5833	0.484967	2.43886	0.905285	2548.86	51.3464	2519.2	33.3525	2496.1	19.2721	2496.1	19.2721	102.114
-Spot 162	100.924	88285.2	2.02334	6.08253	1.21094	10.6634	3.61735	0.470619	2.4064	0.893275	2486.27	49.6437	2494.25	33.593	2501.47	20.3815	2501.47	20.3815	99.3927
-Spot 271	26.7103	32501.1	0.690859	6.08006	0.929438	10.1972	3.22422	0.44986	2.29478	0.926863	2394.63	45.9006	2452.83	29.823	2502.15	15.6414	2502.15	15.6414	95.703
-Spot 45	93.8715	572063	0.552332	6.07454	0.888293	10.6488	2.619	0.469358	1.7307	0.88966	2480.74	35.6387	2492.98	24.3146	2503.68	14.9465	2503.68	14.9465	99.084
-Spot 112	143.612	3.054e+06	1.52856	6.06758	1.12208	10.3965	3.42048	0.457709	2.2984	0.898628	2429.43	46.5232	2470.74	31.6938	2505.61	18.8777	2505.61	18.8777	96.9599
-Spot 191	224.093	604323	1.08218	6.037	0.972253	10.0763	3.66513	0.441379	2.69287	0.940573	2356.81	53.1591	2441.8	33.8677	2514.1	16.3427	2514.1	16.3427	93.7437
-Spot 234	145.261	100159	2.74128	5.99524	0.840709	11.0016	3.04192	0.478576	2.20121	0.934183	2521.06	45.9297	2523.27	28.3209	2525.76	14.1178	2525.76	14.1178	99.8137
-Spot 84	186.3	304075	1.42246	5.97436	0.59631	10.7233	2.8142	0.464846	2.21789	0.965705	2460.92	45.3714	2499.45	26.1432	2531.62	10.0077	2531.62	10.0077	97.2074
-Spot 283	120.557	66618.9	1.23532	5.95061	0.962543	11.0069	3.6989	0.475241	2.73636	0.943339	2506.5	56.8268	2523.72	34.4432	2538.3	16.1406	2538.3	16.1406	98.7472
-Spot 230	735.646	528171	12.3901	5.85742	0.914628	11.5402	3.29558	0.490465	2.38095	0.933493	2572.69	50.5084	2567.84	30.8038	2564.74	15.2975	2564.74	15.2975	100.31
-Spot 268	248.713	115083	4.49862	5.85681	0.99737	10.9177	3.35022	0.463958	2.35285	0.920696	2457.01	48.0697	2516.14	31.173	2564.91	16.6814	2564.91	16.6814	95.7932
-Spot 304	1124.46	162571	17.6099	5.77691	1.15764	9.1226	3.09798	0.382386	1.94033	0.858771	2087.42	34.5997	2350.38	28.3562	2587.86	19.3193	2587.86	19.3193	80.662
-Spot 301	335.844	360661	1.50112	5.69772	1.11152	11.6964	4.45696	0.483549	3.34544	0.948992	2542.7	70.2954	2580.41	41.7142	2610.87	18.5083	2610.87	18.5083	97.3892
-Spot 14	225.89	308255	3.18578	5.51761	0.904682	12.5765	2.61534	0.503498	1.71066	0.883994	2628.81	36.9302	2648.46	24.6046	2664.22	14.99	2664.22	14.99	98.6711
-Spot 142	81.8106	166044	1.83113	5.01684	1.06885	15.0743	2.80387	0.548724	1.73501	0.851406	2819.86	39.6284	2819.94	26.705	2820.7	17.4526	2820.7	17.4526	99.9704
-Spot 257	112.693	584895	8.53627	4.77859	1.11534	16.0996	3.26126	0.558216	2.14592	0.887309	2859.25	49.5582	2882.73	31.1875	2899.86	18.0844	2899.86	18.0844	98.5997
-Spot 72	109.804	60612.9	2.16285	4.74843	1.13105	16.0683	3.46065	0.553616	2.32959	0.899578	2840.2	53.5148	2880.87	33.0918	2910.13	18.3264	2910.13	18.3264	97.597
-Spot 13	32.0986	173.806	1.93774	2.19995	37.7763	6.93318	79.0403	0.110671	41.2641	0.737591	676.641	265.205	2102.91	862.495	NA	NA	5000	1808.36	NA
Notes: see Table S5a

## Sheet: S6
Table S5c. U-Pb geochronologic analyses.		JHPM16-S6
							Isotope ratios						Apparent ages (Ma)
Analysis	U	206Pb	U/Th	206Pb*	±	207Pb*	±	206Pb*	±	error	206Pb*	±	207Pb*	±	206Pb*	±	Best age	±	Conc	U	Th
	(ppm)	204Pb		207Pb*	(%)	235U*	(%)	238U	(%)	corr.	238U*	(Ma)	235U	(Ma)	207Pb*	(Ma)	(Ma)	(Ma)	(%)
																				Age	Th	U	Age	U/Th
He3-JH16S6-May2-Spot 156	410.117	4816.17	0.634134	19.9186	4.22907	0.0326917	5.13351	0.0047248	2.90997	0.566857	30.3863	0.882151	32.6636	1.65011	204.492	98.1586	30.3863	0.882151	NA	30.3863	646.736	410.117	30.3863	0.634134
He3-JH16S6-May2-Spot 59	109.775	3315.64	0.952043	21.7185	6.37217	0.0307509	7.25018	0.00484592	3.45841	0.47701	31.1634	1.07515	30.7535	2.19626	NA	NA	31.1634	1.07515	NA	31.1634	115.305	109.775	31.1634	0.952043
He3-JH16S6-May2-Spot 248	194.434	1180.26	0.895924	26.89	17.435	0.0249106	17.7145	0.0048603	3.13458	0.17695	31.2556	0.977361	24.9839	4.3718	NA	NA	31.2556	0.977361	NA	31.2556	217.021	194.434	31.2556	0.895924
He3-JH16S6-May2-Spot 205	118.34	1783.68	1.02307	23.0033	10.3247	0.0292217	11.039	0.00487734	3.90643	0.353875	31.365	1.22227	29.246	3.18242	NA	NA	31.365	1.22227	NA	31.365	115.671	118.34	31.365	1.02307
He3-JH16S6-May2-Spot 277	124.952	1534.54	1.11462	26.1919	3.9631	0.0259331	5.4106	0.00492843	3.68354	0.680801	31.6927	1.16455	25.9964	1.38871	NA	NA	31.6927	1.16455	NA	31.6927	112.103	124.952	31.6927	1.11462
He3-JH16S6-May2-Spot 52	121.372	2481.1	1.03196	24.2413	4.03422	0.0281206	5.57271	0.00494615	3.84451	0.689881	31.8063	1.21978	28.159	1.54766	NA	NA	31.8063	1.21978	NA	31.8063	117.613	121.372	31.8063	1.03196
He3-JH16S6-May2-Spot 70	179.898	2754.11	0.790929	21.9392	6.73838	0.0312712	7.50655	0.00497798	3.30795	0.440675	32.0105	1.05627	31.2659	2.31123	NA	NA	32.0105	1.05627	NA	32.0105	227.451	179.898	32.0105	0.790929
He3-JH16S6-May2-Spot 64	98.7575	1314.02	1.01461	28.2747	4.08376	0.024285	5.10725	0.00498224	3.06707	0.600533	32.0378	0.980185	24.3639	1.22952	NA	NA	32.0378	0.980185	NA	32.0378	97.3359	98.7575	32.0378	1.01461
He3-JH16S6-May2-Spot 285	277.928	4851.06	0.777059	20.0847	2.93307	0.0342038	3.81462	0.00498456	2.43894	0.639366	32.0528	0.779807	34.1492	1.281	185.138	68.3026	32.0528	0.779807	NA	32.0528	357.666	277.928	32.0528	0.777059
He3-JH16S6-May2-Spot 63	83.0712	2700.86	2.27675	26.6161	3.67038	0.0260473	5.63933	0.00503031	4.28139	0.759202	32.3461	1.3814	26.1094	1.45362	NA	NA	32.3461	1.3814	NA	32.3461	36.4868	83.0712	32.3461	2.27675
He3-JH16S6-May2-Spot 117	636.148	46497.6	1.51498	20.874	1.90588	0.0332261	3.5569	0.00503238	3.00319	0.844329	32.3594	0.96938	33.1888	1.16141	94.659	45.113	32.3594	0.96938	NA	32.3594	419.907	636.148	32.3594	1.51498
He3-JH16S6-May2-Spot 217	182.322	4293.55	0.932375	20.4795	2.93431	0.0339424	4.31854	0.00504371	3.16854	0.733705	32.4321	1.02504	33.8925	1.43951	139.621	68.934	32.4321	1.02504	NA	32.4321	195.546	182.322	32.4321	0.932375
He3-JH16S6-May2-Spot 181	103.57	695.554	1.06682	26.7018	7.19089	0.0260668	7.51661	0.00505028	2.18872	0.291185	32.4743	0.708984	26.1287	1.93894	NA	NA	32.4743	0.708984	NA	32.4743	97.0823	103.57	32.4743	1.06682
He3-JH16S6-May2-Spot 284	171.3	1174.08	0.777284	29.3994	19.2188	0.0237074	19.5122	0.0050572	3.37083	0.172755	32.5187	1.09339	23.7912	4.58824	NA	NA	32.5187	1.09339	NA	32.5187	220.383	171.3	32.5187	0.777284
He3-JH16S6-May2-Spot 53	112.632	563.049	0.963909	32.2558	23.2898	0.0216479	23.6184	0.00506652	3.92594	0.166224	32.5784	1.27578	21.7463	5.08157	NA	NA	32.5784	1.27578	NA	32.5784	116.849	112.632	32.5784	0.963909
He3-JH16S6-May2-Spot 253	221.548	1584.38	1.37173	22.8186	7.01068	0.0306376	7.38037	0.00507261	2.30659	0.31253	32.6175	0.750452	30.6419	2.22771	NA	NA	32.6175	0.750452	NA	32.6175	161.509	221.548	32.6175	1.37173
He3-JH16S6-May2-Spot 265	117.189	933.912	1.73459	29.2745	6.44993	0.0238825	6.92704	0.00507292	2.52632	0.364704	32.6195	0.821992	23.9649	1.64062	NA	NA	32.6195	0.821992	NA	32.6195	67.5604	117.189	32.6195	1.73459
He3-JH16S6-May2-Spot 62	241.035	2859.58	0.665672	22.191	4.12385	0.0315873	5.00659	0.00508602	2.83898	0.567049	32.7035	0.926095	31.5771	1.55661	NA	NA	32.7035	0.926095	NA	32.7035	362.093	241.035	32.7035	0.665672
He3-JH16S6-May2-Spot 67	284.833	18084	1.25266	21.4296	2.80332	0.0331315	4.4147	0.00515161	3.41042	0.772514	33.1242	1.12678	33.0959	1.43753	32.0748	67.1733	33.1242	1.12678	NA	33.1242	227.382	284.833	33.1242	1.25266
He3-JH16S6-May2-Spot 200	93.1265	4557.13	1.44097	20.697	4.96654	0.0345718	6.18115	0.00519179	3.67969	0.595308	33.3818	1.22517	34.5105	2.0973	114.762	117.221	33.3818	1.22517	NA	33.3818	64.6277	93.1265	33.3818	1.44097
He3-JH16S6-May2-Spot 100	155.502	1549.63	0.826639	22.2335	11.1794	0.0321902	11.545	0.00519302	2.88231	0.249659	33.3897	0.959907	32.1703	3.65586	NA	NA	33.3897	0.959907	NA	33.3897	188.113	155.502	33.3897	0.826639
He3-JH16S6-May2-Spot 19	345.116	11242.8	0.67714	22.2967	2.1095	0.0322466	4.20829	0.00521688	3.64139	0.865289	33.5428	1.21825	32.2258	1.33486	NA	NA	33.5428	1.21825	NA	33.5428	509.667	345.116	33.5428	0.67714
He3-JH16S6-May2-Spot 228	173.539	7000.41	0.95929	19.4573	3.64117	0.0375497	4.67499	0.00530123	2.93214	0.627197	34.0836	0.996743	37.4289	1.71794	258.592	83.6963	34.0836	0.996743	NA	34.0836	180.903	173.539	34.0836	0.95929
He3-JH16S6-May2-Spot 56	506.53	3179.34	3.0441	16.7266	4.50189	0.0437886	5.58999	0.00531443	3.31376	0.592802	34.1683	1.12926	43.5162	2.38117	595.818	97.5661	34.1683	1.12926	NA	34.1683	166.397	506.53	34.1683	3.0441
He3-JH16S6-May2-Spot 141	109.728	905.159	1.81444	34.8683	11.2967	0.0213151	11.7635	0.00539269	3.28086	0.278901	34.6701	1.13442	21.4155	2.49285	NA	NA	34.6701	1.13442	NA	34.6701	60.4751	109.728	34.6701	1.81444
He3-JH16S6-May2-Spot 275	90.5681	1562.56	1.2123	20.3512	6.91444	0.0369535	8.42374	0.00545674	4.81143	0.571175	35.0808	1.6833	36.8452	3.04812	154.355	162.086	35.0808	1.6833	NA	35.0808	74.7075	90.5681	35.0808	1.2123
He3-JH16S6-May2-Spot 125	602.354	18912.7	1.00136	20.7918	2.1585	0.0379206	3.70911	0.00572077	3.01636	0.813228	36.7734	1.10606	37.7919	1.37598	103.992	51.049	36.7734	1.10606	NA	36.7734	601.533	602.354	36.7734	1.00136
He3-JH16S6-May2-Spot 161	80.104	7179.76	1.89271	19.4176	5.1893	0.0406319	6.01803	0.00572468	3.04761	0.506413	36.7985	1.11828	40.4408	2.38592	263.243	119.18	36.7985	1.11828	NA	36.7985	42.3223	80.104	36.7985	1.89271
He3-JH16S6-May2-Spot 168	1274.32	32153.5	1.65722	21.4416	1.59902	0.0375999	3.14266	0.00584968	2.70545	0.860878	37.5996	1.01428	37.4781	1.15634	30.7488	38.3148	37.5996	1.01428	NA	37.5996	768.946	1274.32	37.5996	1.65722
He3-JH16S6-May2-Spot 276	281.989	8962.64	1.04784	20.9407	2.36303	0.0392085	3.44023	0.00595742	2.50025	0.726769	38.2901	0.95451	39.0509	1.31794	87.1182	56.0152	38.2901	0.95451	NA	38.2901	269.115	281.989	38.2901	1.04784
He3-JH16S6-May2-Spot 187	65.7817	528.374	1.95824	29.7744	7.13216	0.0279901	8.35902	0.00604694	4.35953	0.521536	38.8637	1.68918	28.0302	2.31101	NA	NA	38.8637	1.68918	NA	38.8637	33.5923	65.7817	38.8637	1.95824
He3-JH16S6-May2-Spot 208	681.723	8629.21	1.20788	21.1697	1.97229	0.0435572	3.31832	0.00669055	2.66858	0.804196	42.9864	1.14331	43.2911	1.40634	61.2228	46.987	42.9864	1.14331	NA	42.9864	564.397	681.723	42.9864	1.20788
He3-JH16S6-May2-Spot 133	746.963	3770.35	0.680109	6.56834	16.0292	0.140731	16.6231	0.00670706	4.40351	0.264903	43.0921	1.89124	133.694	20.8261	2371.29	275.305	43.0921	1.89124	NA	43.0921	1098.3	746.963	43.0921	0.680109
He3-JH16S6-May2-Spot 154	1135.03	84588.6	0.207529	20.7583	1.49519	0.0452712	3.31708	0.0068187	2.96099	0.892647	43.807	1.29272	44.9574	1.45874	107.819	35.3415	43.807	1.29272	NA	43.807	5469.25	1135.03	43.807	0.207529
He3-JH16S6-May2-Spot 247	245.586	22136	0.699687	20.9134	2.32133	0.061175	3.47012	0.00928296	2.57937	0.743308	59.5657	1.52934	60.2902	2.03124	90.2094	55.0178	59.5657	1.52934	NA	59.5657	350.993	245.586	59.5657	0.699687
He3-JH16S6-May2-Spot 291	196.987	32918.5	0.86216	20.3922	2.19943	0.0831464	3.00349	0.0123025	2.04535	0.680992	78.8234	1.6024	81.0988	2.34106	149.672	51.5736	78.8234	1.6024	NA	78.8234	228.48	196.987	78.8234	0.86216
He3-JH16S6-May2-Spot 43	380.861	20586.2	1.33342	21.1859	1.58421	0.0843784	3.22661	0.0129708	2.81092	0.87117	83.0775	2.32026	82.2531	2.54934	59.438	37.7555	83.0775	2.32026	NA	83.0775	285.628	380.861	83.0775	1.33342
He3-JH16S6-May2-Spot 264	242.398	14469.2	3.42833	20.229	1.57238	0.187027	3.21597	0.0274515	2.80537	0.872325	174.578	4.83185	174.089	5.14505	168.446	36.742	174.578	4.83185	NA	174.578	70.7042	242.398	174.578	3.42833
He3-JH16S6-May2-Spot 221	724.601	26659.2	2.30615	19.1525	1.60613	0.234066	3.03279	0.0325275	2.57258	0.848254	206.348	5.22439	213.55	5.84087	294.717	36.6682	206.348	5.22439	NA	206.348	314.204	724.601	206.348	2.30615
He3-JH16S6-May2-Spot 175	119.842	14883	1.69373	19.5597	1.70166	0.236487	2.58752	0.0335627	1.94926	0.753331	212.807	4.08045	215.54	5.02499	246.473	39.1906	212.807	4.08045	NA	212.807	70.7563	119.842	212.807	1.69373
He3-JH16S6-May2-Spot 131	906.627	105887	0.862923	19.9774	1.10991	0.238301	3.2438	0.0345425	3.048	0.939641	218.915	6.56053	217.028	6.33854	197.609	25.7922	218.915	6.56053	NA	218.915	1050.65	906.627	218.915	0.862923
He3-JH16S6-May2-Spot 250	733.96	3.35454e+06	5.60913	20.3313	1.23853	0.235665	3.05201	0.0347656	2.78942	0.913959	220.305	6.04142	214.865	5.91039	156.671	28.9692	220.305	6.04142	NA	220.305	130.851	733.96	220.305	5.60913
He3-JH16S6-May2-Spot 72	452.824	46598.8	1.71428	19.808	1.45603	0.247179	3.18965	0.0355255	2.83793	0.88973	225.038	6.27623	224.282	6.41892	217.348	33.7076	225.038	6.27623	NA	225.038	264.149	452.824	225.038	1.71428
He3-JH16S6-May2-Spot 29	289.46	17449.1	0.745722	19.2533	1.36066	0.261203	3.65085	0.0364896	3.38782	0.927953	231.037	7.68853	235.636	7.6776	282.76	31.107	231.037	7.68853	NA	231.037	388.161	289.46	231.037	0.745722
He3-JH16S6-May2-Spot 46	768.825	289476	2.5829	19.1832	1.31439	0.275484	2.91293	0.0383446	2.59952	0.892409	242.564	6.18834	247.069	6.38832	291.053	30.042	242.564	6.18834	NA	242.564	297.659	768.825	242.564	2.5829
He3-JH16S6-May2-Spot 24	413.567	39551.3	1.41567	19.327	1.44847	0.274743	3.29541	0.0385281	2.96001	0.898222	243.703	7.07897	246.479	7.2119	273.968	33.1874	243.703	7.07897	NA	243.703	292.135	413.567	243.703	1.41567
He3-JH16S6-May2-Spot 11	430.73	136637	0.715132	18.6499	1.95518	0.294919	3.99295	0.0399086	3.4815	0.871914	252.267	8.61305	262.424	9.23412	355.117	44.1382	252.267	8.61305	NA	252.267	602.309	430.73	252.267	0.715132
He3-JH16S6-May2-Spot 241	111.284	117529	1.36784	19.2985	1.43741	0.285567	3.10263	0.039987	2.74957	0.886207	252.752	6.81512	255.064	6.99809	277.391	32.9111	252.752	6.81512	NA	252.752	81.357	111.284	252.752	1.36784
He3-JH16S6-May2-Spot 165	214.555	82524.6	1.96973	19.4935	1.48268	0.283614	3.28765	0.0401148	2.93434	0.892532	253.545	7.29545	253.52	7.37593	254.282	34.107	253.545	7.29545	NA	253.545	108.926	214.555	253.545	1.96973
He3-JH16S6-May2-Spot 238	459.299	74240.9	2.93752	19.524	1.09684	0.290308	2.95584	0.0411259	2.74479	0.928602	259.808	6.98942	258.802	6.75277	250.674	25.2394	259.808	6.98942	NA	259.808	156.356	459.299	259.808	2.93752
He3-JH16S6-May2-Spot 260	142.615	18362.3	1.41944	19.4682	1.70952	0.291284	3.13147	0.0411463	2.62367	0.837839	259.934	6.68415	259.57	7.17266	257.265	39.2969	259.934	6.68415	NA	259.934	100.473	142.615	259.934	1.41944
He3-JH16S6-May2-Spot 282	2254.43	12702.7	1.7105	13.5207	1.07013	0.419967	3.13419	0.0412003	2.94584	0.939905	260.269	7.51441	356.027	9.4125	1040.38	21.6197	260.269	7.51441	NA	260.269	1317.99	2254.43	260.269	1.7105
He3-JH16S6-May2-Spot 162	213.433	45554.3	3.34587	18.9641	1.48199	0.304936	2.77167	0.0419593	2.34219	0.845047	264.966	6.0802	270.248	6.57652	317.225	33.6749	264.966	6.0802	NA	264.966	63.79	213.433	264.966	3.34587
He3-JH16S6-May2-Spot 299	104.382	49416	2.14954	18.8418	1.42821	0.315715	2.56154	0.0431624	2.12643	0.830138	272.406	5.67182	278.601	6.24122	331.942	32.3881	272.406	5.67182	NA	272.406	48.56	104.382	272.406	2.14954
He3-JH16S6-May2-Spot 84	671.281	33536.6	2.21069	18.2766	1.27231	0.330048	2.8277	0.0437682	2.5253	0.893057	276.148	6.8263	289.602	7.12491	400.571	28.5057	276.148	6.8263	NA	276.148	303.653	671.281	276.148	2.21069
He3-JH16S6-May2-Spot 15	356.222	49962.2	2.00654	18.8192	1.2169	0.322501	2.57756	0.0440373	2.27221	0.881538	277.809	6.17834	283.824	6.38232	334.679	27.5832	277.809	6.17834	NA	277.809	177.531	356.222	277.809	2.00654
He3-JH16S6-May2-Spot 39	2124.47	3083.74	2.96561	9.51305	2.30828	0.638027	3.47396	0.0440399	2.5962	0.747331	277.826	7.05968	501.084	13.7404	1716.38	42.4403	277.826	7.05968	NA	277.826	716.368	2124.47	277.826	2.96561
He3-JH16S6-May2-Spot 179	150.88	9575.23	1.9564	19.7582	1.71544	0.31325	3.35416	0.0449084	2.8823	0.85932	283.186	7.98559	276.697	8.12395	223.172	39.6885	283.186	7.98559	NA	283.186	77.121	150.88	283.186	1.9564
He3-JH16S6-May2-Spot 160	372.527	139679	2.61342	18.8225	1.37874	0.333779	3.09522	0.0455853	2.77119	0.895312	287.361	7.78844	292.447	7.86513	334.239	31.254	287.361	7.78844	NA	287.361	142.544	372.527	287.361	2.61342
He3-JH16S6-May2-Spot 8	161.427	13282.9	0.909943	18.739	2.07588	0.336357	3.27604	0.0457335	2.5344	0.773617	288.274	7.14508	294.408	8.37274	344.315	46.9556	288.274	7.14508	NA	288.274	177.403	161.427	288.274	0.909943
He3-JH16S6-May2-Spot 225	36.3854	47668.8	2.13169	17.6283	1.87926	0.359661	3.24958	0.0460037	2.65106	0.815818	289.94	7.5162	311.962	8.72832	480.907	41.5223	289.94	7.5162	NA	289.94	17.0688	36.3854	289.94	2.13169
He3-JH16S6-May2-Spot 119	134.883	38178.9	2.06575	19.2447	1.4661	0.335627	3.57621	0.0468657	3.26188	0.912104	295.25	9.41349	293.853	9.12508	283.779	33.5362	295.25	9.41349	NA	295.25	65.2949	134.883	295.25	2.06575
He3-JH16S6-May2-Spot 196	382.167	32667.2	4.44743	18.9928	1.39866	0.346455	3.1918	0.0477447	2.86903	0.898876	300.66	8.42797	302.052	8.33932	313.795	31.8131	300.66	8.42797	NA	300.66	85.9299	382.167	300.66	4.44743
He3-JH16S6-May2-Spot 4	505.648	84566.2	1.20889	19.6236	1.34225	0.338985	3.54627	0.0482665	3.28244	0.925603	303.87	9.74291	296.402	9.11628	238.961	30.9515	303.87	9.74291	NA	303.87	418.274	505.648	303.87	1.20889
He3-JH16S6-May2-Spot 74	335.491	90009.6	0.991299	19.0367	1.04256	0.354589	2.67323	0.0489784	2.46155	0.920815	308.246	7.40908	308.167	7.10543	308.576	23.7431	308.246	7.40908	NA	308.246	338.436	335.491	308.246	0.991299
He3-JH16S6-May2-Spot 134	272.533	39995.6	3.33956	19.1083	1.18573	0.356626	3.26029	0.0494451	3.03703	0.931521	311.114	9.22425	309.693	8.70262	299.977	27.0542	311.114	9.22425	NA	311.114	81.6074	272.533	311.114	3.33956
He3-JH16S6-May2-Spot 203	141.695	11584.9	1.39096	19.0942	1.62971	0.357989	3.06286	0.0495976	2.59329	0.84669	312.05	7.89964	310.713	8.19861	301.668	37.1538	312.05	7.89964	NA	312.05	101.868	141.695	312.05	1.39096
He3-JH16S6-May2-Spot 48	164.324	10031.4	3.18978	19.6058	1.38929	0.355499	3.43746	0.0505722	3.1442	0.914688	318.034	9.75698	308.849	9.15417	241.043	32.0133	318.034	9.75698	NA	318.034	51.5159	164.324	318.034	3.18978
He3-JH16S6-May2-Spot 30	126.429	27102.9	2.69345	19.1026	1.8606	0.374048	3.22085	0.051845	2.62907	0.816267	325.839	8.35365	322.649	8.90301	300.703	42.4386	325.839	8.35365	NA	325.839	46.9396	126.429	325.839	2.69345
He3-JH16S6-May2-Spot 158	316.33	39074	1.93383	18.7274	1.4772	0.384609	3.61624	0.052262	3.30076	0.912763	328.394	10.5681	330.424	10.1998	345.744	33.3963	328.394	10.5681	NA	328.394	163.577	316.33	328.394	1.93383
He3-JH16S6-May2-Spot 204	270.593	182026	1.13324	18.8639	1.08022	0.392239	2.85324	0.0536872	2.64085	0.925562	337.119	8.67405	336.004	8.16234	329.269	24.503	337.119	8.67405	NA	337.119	238.779	270.593	337.119	1.13324
He3-JH16S6-May2-Spot 297	46.9291	15017.2	1.13317	17.5012	2.01336	0.485163	2.80957	0.0616087	1.9596	0.697474	385.402	7.331	401.609	9.31954	496.914	44.3645	385.402	7.331	NA	385.402	41.4141	46.9291	385.402	1.13317
He3-JH16S6-May2-Spot 23	507.201	72077	2.37147	18.1079	1.20488	0.484957	2.6199	0.0637175	2.3264	0.887973	398.194	8.9833	401.468	8.68791	421.302	26.8976	398.194	8.9833	NA	398.194	213.876	507.201	398.194	2.37147
He3-JH16S6-May2-Spot 113	588.3	115332	2.97942	17.7784	1.39818	0.515942	3.31963	0.0665551	3.01082	0.906975	415.368	12.1116	422.437	11.4725	462.15	31.0029	415.368	12.1116	89.8773	415.368	197.455	588.3	415.368	2.97942
He3-JH16S6-May2-Spot 129	740.922	118104	3.8289	18.0555	1.29419	0.511387	2.98031	0.0669958	2.68465	0.900794	418.031	10.8665	419.381	10.2395	427.763	28.8727	418.031	10.8665	97.7248	418.031	193.508	740.922	418.031	3.8289
He3-JH16S6-May2-Spot 31	500.715	409165	3.63658	17.6605	1.34713	0.537135	2.91596	0.0688293	2.58613	0.886888	429.099	10.7358	436.534	10.3466	476.91	29.7965	429.099	10.7358	89.9748	429.099	137.689	500.715	429.099	3.63658
He3-JH16S6-May2-Spot 242	269.824	264414	0.758958	17.9955	1.40392	0.527558	3.42578	0.0688846	3.1249	0.912171	429.432	12.9821	430.188	12.0139	435.187	31.2651	429.432	12.9821	98.6776	429.432	355.519	269.824	429.432	0.758958
He3-JH16S6-May2-Spot 239	75.5779	108645	1.15294	17.5727	1.65105	0.545751	3.41405	0.0695859	2.98827	0.875286	433.661	12.5327	442.21	12.2398	487.886	36.4362	433.661	12.5327	88.8857	433.661	65.5525	75.5779	433.661	1.15294
He3-JH16S6-May2-Spot 116	413.9	108245	2.49025	17.9404	1.14035	0.537252	2.84803	0.0699356	2.60977	0.916341	435.768	10.9967	436.611	10.107	442.006	25.3709	435.768	10.9967	98.5887	435.768	166.208	413.9	435.768	2.49025
He3-JH16S6-May2-Spot 190	740.77	69661.6	9.89951	17.8658	1.33785	0.541463	3.47807	0.0701906	3.21047	0.923061	437.304	13.5739	439.389	12.4058	451.27	29.711	437.304	13.5739	96.9051	437.304	74.829	740.77	437.304	9.89951
He3-JH16S6-May2-Spot 177	136.213	21665.4	0.837284	17.9905	1.22624	0.540094	3.44258	0.0705017	3.21678	0.93441	439.178	13.6569	438.487	12.2591	435.809	27.3264	439.178	13.6569	100.773	439.178	162.684	136.213	439.178	0.837284
He3-JH16S6-May2-Spot 40	195.34	41592.9	2.83862	17.609	1.42553	0.552734	3.49624	0.0706217	3.19242	0.913101	439.9	13.575	446.786	12.6378	483.377	31.4829	439.9	13.575	91.0056	439.9	68.8151	195.34	439.9	2.83862
He3-JH16S6-May2-Spot 281	345.401	100350	1.44332	17.4884	1.13959	0.602815	2.70296	0.0764933	2.45098	0.906778	475.157	11.2272	479.019	10.3225	498.485	25.0902	475.157	11.2272	95.3204	475.157	239.31	345.401	475.157	1.44332
He3-JH16S6-May2-Spot 296	223.405	29897.3	1.42371	17.1999	1.16849	0.622872	2.52309	0.0777341	2.23621	0.886297	482.584	10.3976	491.646	9.83312	535.05	25.5694	482.584	10.3976	90.1941	482.584	156.917	223.405	482.584	1.42371
He3-JH16S6-May2-Spot 143	1025.15	118153	1.18571	16.8953	1.11284	0.642399	2.42374	0.0787516	2.15316	0.888362	488.667	10.1329	503.791	9.6262	574.025	24.198	488.667	10.1329	85.1299	488.667	864.587	1025.15	488.667	1.18571
He3-JH16S6-May2-Spot 140	203.606	35346.4	1.50123	16.7239	1.36706	0.678733	3.9205	0.0823613	3.67443	0.937236	510.202	18.0244	526.008	16.0962	596.17	29.5981	510.202	18.0244	85.58	510.202	135.626	203.606	510.202	1.50123
He3-JH16S6-May2-Spot 266	121.106	171344	1.5316	16.4514	1.34234	0.705214	3.01279	0.0841805	2.69722	0.895258	521.028	13.5004	541.9	12.6521	631.66	28.9248	521.028	13.5004	82.4855	521.028	79.0718	121.106	521.028	1.5316
He3-JH16S6-May2-Spot 65	291.211	94305.8	2.74968	17.1647	1.2283	0.676017	3.18366	0.0841939	2.93717	0.922577	521.107	14.7035	524.365	13.0395	539.505	26.8686	521.107	14.7035	96.5898	521.107	105.907	291.211	521.107	2.74968
He3-JH16S6-May2-Spot 51	1024.42	751609	4.30537	16.825	1.35783	0.711134	3.78356	0.086815	3.53152	0.933385	536.673	18.1853	545.419	15.9674	583.057	29.4688	536.673	18.1853	92.0448	536.673	237.941	1024.42	536.673	4.30537
He3-JH16S6-May2-Spot 245	590.835	194339	4.78189	17.0363	1.21981	0.726303	3.60813	0.0897803	3.39568	0.94112	554.238	18.0339	554.381	15.4151	555.939	26.5987	554.238	18.0339	99.694	554.238	123.557	590.835	554.238	4.78189
He3-JH16S6-May2-Spot 145	249.855	65096.1	1.499	16.2363	1.25707	0.775389	2.87755	0.0913467	2.58845	0.899533	563.497	13.9666	582.85	12.7615	659.927	26.9468	563.497	13.9666	85.3878	563.497	166.681	249.855	563.497	1.499
He3-JH16S6-May2-Spot 86	530.98	1.68211e+06	9.22175	16.7838	1.47463	0.757813	3.24265	0.0922867	2.88794	0.890613	569.047	15.7293	572.748	14.1954	588.386	31.9774	569.047	15.7293	96.7132	569.047	57.5792	530.98	569.047	9.22175
He3-JH16S6-May2-Spot 93	434.443	149637	0.914367	16.9671	1.11655	0.760375	2.81912	0.0936103	2.58858	0.918223	576.854	14.2837	574.226	12.3648	564.767	24.2989	576.854	14.2837	102.14	576.854	475.129	434.443	576.854	0.914367
He3-JH16S6-May2-Spot 111	68.7105	17537.1	0.6011	16.783	1.34894	0.773944	3.47312	0.0942469	3.20046	0.921494	580.605	17.7698	582.023	15.387	588.51	29.2553	580.605	17.7698	98.6567	580.605	114.308	68.7105	580.605	0.6011
He3-JH16S6-May2-Spot 298	262.805	59706.1	1.15069	15.9928	1.621	0.81675	2.98345	0.094777	2.50466	0.839518	583.727	13.978	606.234	13.6197	692.221	34.548	583.727	13.978	84.3267	583.727	228.389	262.805	583.727	1.15069
He3-JH16S6-May2-Spot 256	1441.63	2.90297e+06	4.61595	16.4453	1.36924	0.799816	3.41934	0.0954378	3.13321	0.916323	587.617	17.5971	596.725	15.43	632.454	29.4861	587.617	17.5971	92.9106	587.617	312.314	1441.63	587.617	4.61595
He3-JH16S6-May2-Spot 130	298.425	117894	3.72017	16.0421	1.07983	0.825973	2.5794	0.0961426	2.34249	0.908154	591.763	13.2448	611.375	11.8478	685.671	23.0498	591.763	13.2448	86.3043	591.763	80.2179	298.425	591.763	3.72017
He3-JH16S6-May2-Spot 61	564.242	108512	1.97288	16.5268	1.03624	0.802858	3.43832	0.0962756	3.27845	0.953504	592.546	18.5603	598.439	15.5485	621.755	22.3636	592.546	18.5603	95.3021	592.546	285.999	564.242	592.546	1.97288
He3-JH16S6-May2-Spot 36	977.817	212053	3.69308	16.5726	1.38335	0.805763	2.55821	0.0968918	2.15192	0.841184	596.168	12.2537	600.074	11.5913	615.782	29.872	596.168	12.2537	96.8147	596.168	264.77	977.817	596.168	3.69308
He3-JH16S6-May2-Spot 231	192.193	39914.2	1.92839	16.7472	1.00497	0.798226	2.61542	0.0969965	2.41463	0.92323	596.783	13.7632	595.827	11.7889	593.153	21.7788	596.783	13.7632	100.612	596.783	99.6647	192.193	596.783	1.92839
He3-JH16S6-May2-Spot 151	143.966	28517.7	2.13564	16.6457	0.896831	0.80751	3.46002	0.09753	3.34177	0.965824	599.918	19.1434	601.056	15.6968	606.275	19.3885	599.918	19.1434	98.9514	599.918	67.4112	143.966	599.918	2.13564
He3-JH16S6-May2-Spot 171	1053.89	3.78843e+06	1.4231	16.476	1.10642	0.81727	2.4815	0.0977026	2.22119	0.895099	600.931	12.7446	606.524	11.332	628.394	23.8608	600.931	12.7446	95.6296	600.931	740.559	1053.89	600.931	1.4231
He3-JH16S6-May2-Spot 33	69.0859	63835.8	1.45504	16.2313	1.5693	0.834657	2.7301	0.0982992	2.23399	0.818283	604.434	12.8893	616.193	12.612	660.553	33.6461	604.434	12.8893	91.5042	604.434	47.4802	69.0859	604.434	1.45504
He3-JH16S6-May2-Spot 153	835.426	171918	8.10059	16.427	1.28277	0.826931	3.25749	0.0985634	2.99429	0.9192	605.984	17.3182	611.908	14.9724	634.853	27.6136	605.984	17.3182	95.4526	605.984	103.132	835.426	605.984	8.10059
He3-JH16S6-May2-Spot 148	197.372	51776.7	2.7216	16.6913	1.5483	0.819212	3.30349	0.0992141	2.91818	0.883365	609.802	16.9794	607.609	15.1059	600.361	33.5207	609.802	16.9794	101.572	609.802	72.5207	197.372	609.802	2.7216
He3-JH16S6-May2-Spot 89	201.734	20414.6	2.63975	16.5739	1.5686	0.826288	3.49356	0.0993674	3.12161	0.893534	610.701	18.1886	611.551	16.0508	615.619	33.873	610.701	18.1886	99.201	610.701	76.4217	201.734	610.701	2.63975
He3-JH16S6-May2-Spot 22	63.2527	39762	1.5299	16.7774	1.18524	0.818061	3.60086	0.0995862	3.40021	0.944276	611.983	19.8516	606.966	16.4532	589.205	25.7096	611.983	19.8516	103.866	611.983	41.3445	63.2527	611.983	1.5299
He3-JH16S6-May2-Spot 290	570.138	116116	6.88783	15.8331	1.28997	0.868935	3.51398	0.0998253	3.26864	0.930183	613.385	19.1251	634.989	16.5905	713.57	27.3901	613.385	19.1251	85.96	613.385	82.7746	570.138	613.385	6.88783
He3-JH16S6-May2-Spot 150	234.558	86342.7	3.42888	16.7334	0.816516	0.830026	2.94604	0.100778	2.83062	0.960825	618.965	16.7057	613.627	13.5684	594.902	17.6729	618.965	16.7057	104.045	618.965	68.4064	234.558	618.965	3.42888
He3-JH16S6-May2-Spot 90	155.56	114133	3.40705	16.6544	1.25875	0.835951	3.2022	0.101017	2.94442	0.9195	620.369	17.4149	616.909	14.8057	605.154	27.2465	620.369	17.4149	102.514	620.369	45.6583	155.56	620.369	3.40705
He3-JH16S6-May2-Spot 76	191.402	90158.5	2.18804	16.5283	1.05399	0.843142	2.91975	0.101115	2.72287	0.932571	620.941	16.1187	620.878	13.5626	621.569	22.7441	620.941	16.1187	99.899	620.941	87.4767	191.402	620.941	2.18804
He3-JH16S6-May2-Spot 249	100	25072.3	1.08383	16.4355	1.41176	0.85688	3.52948	0.102186	3.23483	0.916519	627.204	19.3333	628.418	16.5392	633.746	30.4167	627.204	19.3333	98.9678	627.204	92.2655	100	627.204	1.08383
He3-JH16S6-May2-Spot 254	81.2594	24122.4	2.18015	16.4781	1.27334	0.855036	3.13667	0.10223	2.86659	0.913894	627.464	17.1392	627.409	14.6812	628.13	27.4611	627.464	17.1392	99.8939	627.464	37.2723	81.2594	627.464	2.18015
He3-JH16S6-May2-Spot 270	112.639	326430	1.11081	16.1521	1.03673	0.883881	2.65464	0.103588	2.44383	0.920589	635.403	14.7875	643.077	12.6473	671.032	22.1737	635.403	14.7875	94.6904	635.403	101.402	112.639	635.403	1.11081
He3-JH16S6-May2-Spot 49	753.598	197114	151.879	16.0535	1.42869	0.901297	3.56439	0.104984	3.26554	0.916155	643.553	20.0006	652.42	17.1583	684.165	30.5202	643.553	20.0006	94.0639	643.553	4.96184	753.598	643.553	151.879
He3-JH16S6-May2-Spot 58	452.819	185823	3.97721	15.9493	1.1686	0.915437	2.62981	0.105939	2.3559	0.895845	649.121	14.548	659.944	12.7626	698.033	24.8815	649.121	14.548	92.9929	649.121	113.853	452.819	649.121	3.97721
He3-JH16S6-May2-Spot 20	349.361	93573.1	1.47689	15.9296	1.22361	0.918496	3.03293	0.106162	2.77514	0.915005	650.42	17.1694	661.564	14.7448	700.641	26.0344	650.42	17.1694	92.8322	650.42	236.552	349.361	650.42	1.47689
He3-JH16S6-May2-Spot 108	434.996	95854.2	14.2499	16.2431	1.08662	0.902345	3.5001	0.106348	3.32716	0.950588	651.505	20.6173	652.98	16.8591	659.033	23.2757	651.505	20.6173	98.8577	651.505	30.5262	434.996	651.505	14.2499
He3-JH16S6-May2-Spot 102	341.546	193489	2.55651	16.2141	1.60615	0.918503	3.7423	0.108059	3.3801	0.903216	661.464	21.2494	661.568	18.1942	662.833	34.4326	661.464	21.2494	99.7934	661.464	133.598	341.546	661.464	2.55651
He3-JH16S6-May2-Spot 85	155.375	76216.8	0.974651	16.3314	1.31737	0.918642	3.24384	0.108857	2.96429	0.913822	666.109	18.7596	661.642	15.7716	647.402	28.3025	666.109	18.7596	102.89	666.109	159.416	155.375	666.109	0.974651
He3-JH16S6-May2-Spot 251	1034.81	120995	1.13144	15.3533	1.07447	0.997431	2.7424	0.111115	2.52314	0.920051	679.22	16.2658	702.505	13.9059	778.599	22.5914	679.22	16.2658	87.2362	679.22	914.594	1034.81	679.22	1.13144
He3-JH16S6-May2-Spot 186	371.209	99536.2	8.92381	16.2328	1.21998	0.947153	3.30653	0.111558	3.07324	0.929445	681.79	19.8831	676.619	16.3328	660.402	26.15	681.79	19.8831	103.239	681.79	41.5977	371.209	681.79	8.92381
He3-JH16S6-May2-Spot 122	376.721	208469	2.13112	15.831	1.29156	0.997474	3.31869	0.114577	3.05706	0.921163	699.276	20.2587	702.527	16.829	713.847	27.4219	699.276	20.2587	97.9588	699.276	176.771	376.721	699.276	2.13112
He3-JH16S6-May2-Spot 80	274.692	2.48011e+06	1.42544	15.9572	1.24834	0.994863	3.41285	0.115188	3.17635	0.930703	702.807	21.1498	701.198	17.2838	696.996	26.5775	702.807	21.1498	100.834	702.807	192.707	274.692	702.807	1.42544
He3-JH16S6-May2-Spot 135	178.466	56433.3	1.6275	15.6226	1.22792	1.03235	2.82044	0.117022	2.53912	0.900254	713.4	17.1478	720.1	14.5481	741.93	25.9699	713.4	17.1478	96.1547	713.4	109.656	178.466	713.4	1.6275
He3-JH16S6-May2-Spot 293	129.174	30299.9	1.80493	15.568	1.57625	1.04087	3.74195	0.117576	3.39376	0.906951	716.596	23.0167	724.351	19.3804	749.337	33.3002	716.596	23.0167	95.6306	716.596	71.5673	129.174	716.596	1.80493
He3-JH16S6-May2-Spot 199	195.442	120053	0.45459	15.6119	1.4728	1.05161	3.41222	0.119124	3.07801	0.902053	725.52	21.1208	729.68	17.7612	743.382	31.1435	725.52	21.1208	97.5972	725.52	429.93	195.442	725.52	0.45459
He3-JH16S6-May2-Spot 259	569.157	290963	5.86161	15.604	1.12459	1.05643	3.1935	0.119609	2.98894	0.935943	728.312	20.5842	732.06	16.6595	744.45	23.7763	728.312	20.5842	97.8322	728.312	97.0991	569.157	728.312	5.86161
He3-JH16S6-May2-Spot 9	658.169	87861.3	5.63229	14.7712	1.09429	1.13444	3.28904	0.121587	3.10167	0.94303	739.691	21.6755	769.87	17.7518	859.342	22.7131	739.691	21.6755	86.0764	739.691	116.856	658.169	739.691	5.63229
He3-JH16S6-May2-Spot 174	96.4733	116292	0.566836	15.3854	1.48123	1.1023	3.18491	0.123054	2.8195	0.885269	748.119	19.9153	754.463	16.9579	774.212	31.1664	748.119	19.9153	96.6298	748.119	170.196	96.4733	748.119	0.566836
He3-JH16S6-May2-Spot 25	1230.19	405608	4.9251	14.9191	1.41192	1.13807	2.40791	0.123197	1.95052	0.810045	748.936	13.7915	771.592	13.0149	838.63	29.4124	748.936	13.7915	89.3048	748.936	249.78	1230.19	748.936	4.9251
He3-JH16S6-May2-Spot 101	126.161	42765.9	0.683161	15.3598	0.986547	1.1154	3.2486	0.12431	3.09517	0.952773	755.322	22.061	760.772	17.3943	777.712	20.7458	755.322	22.061	97.1211	755.322	184.672	126.161	755.322	0.683161
He3-JH16S6-May2-Spot 172	193.34	28195.3	1.97572	15.4167	1.22749	1.12233	3.07572	0.125545	2.82016	0.916912	762.401	20.2783	764.092	16.5167	769.937	25.8451	762.401	20.2783	99.0211	762.401	97.858	193.34	762.401	1.97572
He3-JH16S6-May2-Spot 28	331.261	171561	0.911335	15.4137	1.37378	1.12966	3.44411	0.12634	3.15826	0.917004	766.953	22.837	767.591	18.5521	770.346	28.9232	766.953	22.837	99.5595	766.953	363.491	331.261	766.953	0.911335
He3-JH16S6-May2-Spot 229	144.284	182809	3.40449	15.2702	1.41151	1.14382	3.19899	0.126734	2.87075	0.897392	769.204	20.8154	774.322	17.3323	790	29.6436	769.204	20.8154	97.3676	769.204	42.3804	144.284	769.204	3.40449
He3-JH16S6-May2-Spot 35	537.909	103657	13.0653	15.2368	1.0904	1.15192	3.0068	0.127352	2.80212	0.931928	772.739	20.4057	778.149	16.3444	794.591	22.8874	772.739	20.4057	97.25	772.739	41.1709	537.909	772.739	13.0653
He3-JH16S6-May2-Spot 27	164.664	115222	1.1343	14.9619	1.27755	1.17379	3.39651	0.127428	3.14708	0.926564	773.175	22.93	788.418	18.6245	832.684	26.6302	773.175	22.93	92.8533	773.175	145.168	164.664	773.175	1.1343
He3-JH16S6-May2-Spot 137	596.858	99823.6	1.59007	15.023	1.20289	1.17555	3.55214	0.12814	3.34227	0.940917	777.247	24.4728	789.237	19.4915	824.196	25.1074	777.247	24.4728	94.3036	777.247	375.366	596.858	777.247	1.59007
He3-JH16S6-May2-Spot 38	278.034	163285	1.26176	14.5374	1.23356	1.22071	2.70708	0.128762	2.40969	0.890144	780.797	17.72	810.101	15.1107	892.395	25.4726	780.797	17.72	87.4945	780.797	220.354	278.034	780.797	1.26176
He3-JH16S6-May2-Spot 6	311.687	410474	0.722765	15.2967	1.16397	1.16267	3.19701	0.129046	2.97759	0.931367	782.418	21.939	783.209	17.4535	786.356	24.4619	782.418	21.939	99.4992	782.418	431.242	311.687	782.418	0.722765
He3-JH16S6-May2-Spot 294	160.431	53216	0.788747	15.3892	1.08104	1.18376	2.7953	0.132181	2.5778	0.922191	800.296	19.4009	793.064	15.3869	773.684	22.7473	800.296	19.4009	103.44	800.296	203.4	160.431	800.296	0.788747
He3-JH16S6-May2-Spot 13	345.139	107231	2.43919	14.7591	1.09168	1.24055	2.82011	0.13285	2.60024	0.922035	804.106	19.6572	819.133	15.8559	861.045	22.6733	804.106	19.6572	93.3871	804.106	141.498	345.139	804.106	2.43919
He3-JH16S6-May2-Spot 121	58.2027	26735.9	1.20089	15.3843	1.24845	1.19682	3.0025	0.133596	2.73063	0.909455	808.348	20.7453	799.115	16.6106	774.354	26.2669	808.348	20.7453	104.39	808.348	48.4662	58.2027	808.348	1.20089
He3-JH16S6-May2-Spot 226	161.879	36587.5	2.05537	14.9807	1.46248	1.26925	2.6824	0.137965	2.24865	0.838298	833.144	17.5744	832.057	15.2353	830.044	30.498	833.144	17.5744	100.374	833.144	78.7592	161.879	833.144	2.05537
He3-JH16S6-May2-Spot 157	391.998	459445	6.94142	14.5238	1.51971	1.32413	3.94886	0.13954	3.64472	0.92298	842.061	28.7709	856.318	22.8478	894.34	31.3646	842.061	28.7709	94.1545	842.061	56.4724	391.998	842.061	6.94142
He3-JH16S6-May2-Spot 73	300.297	93172.5	7.20438	14.3678	1.69206	1.36679	3.9154	0.142489	3.53091	0.9018	858.723	28.3882	874.789	22.9627	916.591	34.7898	858.723	28.3882	93.6866	858.723	41.6825	300.297	858.723	7.20438
He3-JH16S6-May2-Spot 235	419.391	253869	4.17879	14.5492	1.57928	1.35845	3.22402	0.143407	2.81073	0.871807	863.901	22.7253	871.205	18.858	890.739	32.6404	863.901	22.7253	96.987	863.901	100.362	419.391	863.901	4.17879
He3-JH16S6-May2-Spot 2	153.785	21981.1	1.36835	14.8467	1.26053	1.35376	3.1062	0.145834	2.83894	0.913957	877.568	23.2923	869.183	18.142	848.757	26.2064	877.568	23.2923	103.394	877.568	112.387	153.785	877.568	1.36835
He3-JH16S6-May2-Spot 92	310.345	361892	3.01334	14.6398	1.13126	1.43266	2.81287	0.152183	2.57536	0.915564	913.188	21.9282	902.659	16.8221	877.889	23.4015	913.188	21.9282	104.021	913.188	102.99	310.345	913.188	3.01334
He3-JH16S6-May2-Spot 128	415.529	103000	0.481506	14.3611	1.15135	1.42145	3.08167	0.148118	2.85851	0.927585	890.404	23.7728	897.972	18.3704	917.559	23.7013	917.559	23.7013	97.0406	917.559	862.978	415.529	917.559	0.481506
He3-JH16S6-May2-Spot 115	240.321	158312	1.86882	14.3334	1.34009	1.5052	2.63493	0.156542	2.2687	0.86101	937.533	19.7955	932.495	16.0763	921.52	27.5547	921.52	27.5547	101.738	921.52	128.595	240.321	921.52	1.86882
He3-JH16S6-May2-Spot 197	192.42	93480.8	1.35365	14.2924	1.57485	1.43207	3.5504	0.148511	3.18201	0.89624	892.611	26.5244	902.416	21.2305	927.384	32.3583	927.384	32.3583	96.2505	927.384	142.149	192.42	927.384	1.35365
He3-JH16S6-May2-Spot 220	398.005	1.35185e+07	2.18537	14.1716	1.26639	1.54708	3.33893	0.159081	3.08945	0.925282	951.67	27.3343	949.328	20.5952	944.774	25.9259	944.774	25.9259	100.73	944.774	182.122	398.005	944.774	2.18537
He3-JH16S6-May2-Spot 163	209.585	59132.5	2.18591	14.0145	1.15002	1.63716	2.81516	0.166478	2.56955	0.912755	992.676	23.6406	984.621	17.7473	967.614	23.4824	967.614	23.4824	102.59	967.614	95.8799	209.585	967.614	2.18591
He3-JH16S6-May2-Spot 287	216.275	42595.6	2.14682	13.9938	1.16232	1.53782	2.94944	0.156146	2.71076	0.919075	935.322	23.6009	945.633	18.1494	970.607	23.7182	970.607	23.7182	96.3647	970.607	100.742	216.275	970.607	2.14682
He3-JH16S6-May2-Spot 81	98.0309	27973.6	0.840348	13.9523	1.23666	1.64894	2.89058	0.166932	2.61268	0.903861	995.186	24.0935	989.147	18.2723	976.659	25.2061	976.659	25.2061	101.897	976.659	116.655	98.0309	976.659	0.840348
He3-JH16S6-May2-Spot 233	794.481	2.47202e+06	6.60886	13.9308	1.19555	1.43279	3.36366	0.144827	3.14402	0.934702	871.898	25.6398	902.716	20.1176	979.78	24.3559	979.78	24.3559	88.9892	979.78	120.215	794.481	979.78	6.60886
He3-JH16S6-May2-Spot 110	379.668	147060	1.94107	13.8545	1.00388	1.64338	2.27223	0.165202	2.03845	0.897112	985.622	18.6309	987.012	14.3447	991.007	20.4109	991.007	20.4109	99.4566	991.007	195.598	379.668	991.007	1.94107
He3-JH16S6-May2-Spot 192	427.293	102878	2.21696	13.8373	0.920767	1.51626	2.88978	0.152234	2.73916	0.94788	913.476	23.3297	936.968	17.683	993.517	18.719	993.517	18.719	91.9437	993.517	192.739	427.293	993.517	2.21696
He3-JH16S6-May2-Spot 246	181.767	103625	0.666116	13.8038	1.17975	1.66329	2.65603	0.166592	2.37964	0.895939	993.305	21.9061	994.63	16.8443	998.417	23.9654	998.417	23.9654	99.488	998.417	272.876	181.767	998.417	0.666116
He3-JH16S6-May2-Spot 288	275.101	91009	1.05488	13.8019	1.10667	1.38241	3.18207	0.13844	2.98343	0.937575	835.835	23.3877	881.465	18.7503	998.698	22.4602	998.698	22.4602	83.6925	998.698	260.788	275.101	998.698	1.05488
He3-JH16S6-May2-Spot 271	73.6718	734298	1.76538	13.7767	0.957291	1.59786	2.87836	0.159725	2.71451	0.943074	955.247	24.1007	969.375	17.9781	1002.41	19.4145	1002.41	19.4145	95.2953	1002.41	41.7314	73.6718	1002.41	1.76538
He3-JH16S6-May2-Spot 12	419.87	222680	1.25718	13.7021	1.25312	1.56071	2.92533	0.155166	2.64334	0.903604	929.859	22.889	954.75	18.1056	1013.42	25.395	1013.42	25.395	91.7545	1013.42	333.978	419.87	1013.42	1.25718
He3-JH16S6-May2-Spot 167	161.94	43418.7	2.97158	13.5447	1.45774	1.84722	4.15078	0.181541	3.88639	0.936302	1075.39	38.4943	1062.44	27.3503	1036.79	29.46	1036.79	29.46	103.723	1036.79	54.4961	161.94	1036.79	2.97158
He3-JH16S6-May2-Spot 144	715.031	54616.8	0.982328	13.3484	1.25991	1.561	3.12974	0.151189	2.86494	0.915393	907.626	24.2555	954.864	19.3724	1066.25	25.3328	1066.25	25.3328	85.1235	1066.25	727.894	715.031	1066.25	0.982328
He3-JH16S6-May2-Spot 55	139.378	52231	4.01975	13.313	1.33966	1.7281	3.37802	0.16693	3.10102	0.918	995.172	28.5966	1019.05	21.7304	1071.59	26.9341	1071.59	26.9341	92.8689	1071.59	34.6733	139.378	1071.59	4.01975
He3-JH16S6-May2-Spot 75	314.144	113287	1.96209	13.3024	1.17248	1.78083	3.45186	0.171885	3.24664	0.940546	1022.49	30.6979	1038.48	22.4493	1073.19	23.5314	1073.19	23.5314	95.2757	1073.19	160.107	314.144	1073.19	1.96209
He3-JH16S6-May2-Spot 286	474.647	232696	5.07787	13.1823	1.00222	1.75203	3.1663	0.167579	3.0035	0.948584	998.76	27.7896	1027.91	20.4705	1091.34	20.0579	1091.34	20.0579	91.5171	1091.34	93.4736	474.647	1091.34	5.07787
He3-JH16S6-May2-Spot 215	478.892	115764	4.76188	13.0453	1.1684	1.82584	2.95615	0.172824	2.71545	0.918576	1027.65	25.7948	1054.79	19.3965	1112.24	23.332	1112.24	23.332	92.3952	1112.24	100.568	478.892	1112.24	4.76188
He3-JH16S6-May2-Spot 112	1194.37	33797.6	2.90583	12.8454	1.75045	1.80786	3.46057	0.168499	2.98521	0.862635	1003.84	27.7502	1048.3	22.6276	1143.04	34.8169	1143.04	34.8169	87.8217	1143.04	411.027	1194.37	1143.04	2.90583
He3-JH16S6-May2-Spot 109	242.147	59507.8	22.9623	12.554	1.20741	2.20878	2.97358	0.201199	2.71741	0.913852	1181.76	29.3418	1183.83	20.7866	1188.49	23.8511	1188.49	23.8511	99.4333	1188.49	10.5454	242.147	1188.49	22.9623
He3-JH16S6-May2-Spot 138	336.018	353703	2.35619	12.2573	0.957728	2.37184	2.6524	0.210944	2.47346	0.932535	1233.85	27.776	1234.15	18.9469	1235.57	18.7763	1235.57	18.7763	99.8609	1235.57	142.611	336.018	1235.57	2.35619
He3-JH16S6-May2-Spot 280	71.4444	56652.8	2.70984	11.1558	1.07379	3.08263	2.90264	0.249523	2.69672	0.929057	1436.02	34.7156	1428.38	22.2574	1417.83	20.5293	1417.83	20.5293	101.282	1417.83	26.3648	71.4444	1417.83	2.70984
He3-JH16S6-May2-Spot 223	1150.92	408211	1.83909	11.1324	1.09096	2.97804	2.60263	0.240551	2.36294	0.907906	1389.56	29.5371	1402.03	19.786	1421.85	20.8461	1421.85	20.8461	97.7288	1421.85	625.811	1150.92	1421.85	1.83909
He3-JH16S6-May2-Spot 262	152.813	52428.9	1.06178	10.5201	1.15593	3.44366	3.07511	0.262863	2.84959	0.926661	1504.47	38.2365	1514.42	24.2021	1529.16	21.7707	1529.16	21.7707	98.3851	1529.16	143.921	152.813	1529.16	1.06178
He3-JH16S6-May2-Spot 212	147.744	179789	1.00843	10.3525	1.29352	3.66269	3.89624	0.275126	3.67525	0.943282	1566.77	51.1203	1563.28	31.0867	1559.36	24.2657	1559.36	24.2657	100.475	1559.36	146.51	147.744	1559.36	1.00843
He3-JH16S6-May2-Spot 194	210.609	522533	1.29578	10.0734	1.40909	3.75611	3.04338	0.274537	2.69752	0.886358	1563.79	37.4573	1583.42	24.4093	1610.46	26.2585	1610.46	26.2585	97.1025	1610.46	162.535	210.609	1610.46	1.29578
He3-JH16S6-May2-Spot 77	173.022	107860	1.31963	9.94106	1.35395	3.96362	3.73722	0.285899	3.48334	0.932067	1621	49.9262	1626.78	30.3111	1635.05	25.1508	1635.05	25.1508	99.1406	1635.05	131.114	173.022	1635.05	1.31963
He3-JH16S6-May2-Spot 152	53.5946	32196.5	1.71988	9.80185	1.32226	4.01322	3.51037	0.285423	3.25182	0.926346	1618.62	46.5474	1636.88	28.5413	1661.21	24.4799	1661.21	24.4799	97.4361	1661.21	31.1618	53.5946	1661.21	1.71988
He3-JH16S6-May2-Spot 230	153.007	367589	0.609564	9.56374	1.28205	4.28493	2.82256	0.297344	2.5146	0.890892	1678.13	37.1532	1690.47	23.2409	1706.6	23.5989	1706.6	23.5989	98.3316	1706.6	251.011	153.007	1706.6	0.609564
He3-JH16S6-May2-Spot 209	49.3212	23478.1	2.08912	9.50249	1.16844	4.45462	2.97199	0.307139	2.73267	0.919474	1726.61	41.3928	1722.56	24.6495	1718.42	21.4754	1718.42	21.4754	100.477	1718.42	23.6087	49.3212	1718.42	2.08912
He3-JH16S6-May2-Spot 71	496.627	136558	1.26755	9.36766	1.02042	4.2956	3.23879	0.291973	3.07384	0.949071	1651.38	44.7812	1692.52	26.6822	1744.64	18.6931	1744.64	18.6931	94.6546	1744.64	391.8	496.627	1744.64	1.26755
He3-JH16S6-May2-Spot 88	369.192	450601	1.49692	9.17293	1.45115	4.6801	3.59677	0.311495	3.29104	0.914998	1748.06	50.3901	1763.69	30.1002	1783.03	26.4585	1783.03	26.4585	98.0389	1783.03	246.635	369.192	1783.03	1.49692
He3-JH16S6-May2-Spot 210	83.7693	95006.9	1.16295	9.16865	1.08374	4.65442	2.30707	0.309641	2.03669	0.882802	1738.94	31.0422	1759.09	19.2851	1783.88	19.7566	1783.88	19.7566	97.481	1783.88	72.0318	83.7693	1783.88	1.16295
He3-JH16S6-May2-Spot 98	145.872	535839	1.9121	9.06452	1.09885	4.81418	2.69218	0.316632	2.45772	0.912908	1773.26	38.1018	1787.38	22.6381	1804.68	19.981	1804.68	19.981	98.2593	1804.68	76.2888	145.872	1804.68	1.9121
He3-JH16S6-May2-Spot 261	959.258	330202	21.756	8.96963	1.23999	4.01036	3.20869	0.261003	2.95941	0.922311	1494.97	39.4874	1636.3	26.0836	1823.78	22.4951	1823.78	22.4951	81.9709	1823.78	44.0916	959.258	1823.78	21.756
He3-JH16S6-May2-Spot 178	338.721	190320	1.07475	8.9181	1.19506	4.9417	3.60987	0.319769	3.40632	0.943612	1788.6	53.205	1809.41	30.4943	1834.23	21.6504	1834.23	21.6504	97.5124	1834.23	315.162	338.721	1834.23	1.07475
He3-JH16S6-May2-Spot 252	262.702	279447	2.57291	8.90995	1.28304	4.24824	3.63102	0.274645	3.39678	0.935489	1564.34	47.182	1683.4	29.8524	1835.89	23.2401	1835.89	23.2401	85.2088	1835.89	102.103	262.702	1835.89	2.57291
He3-JH16S6-May2-Spot 216	48.9414	49280.3	0.896548	8.89483	1.07458	5.15055	2.27566	0.332414	2.00597	0.881488	1850.07	32.2616	1844.49	19.3522	1838.96	19.458	1838.96	19.458	100.604	1838.96	54.5887	48.9414	1838.96	0.896548
He3-JH16S6-May2-Spot 123	484.443	1.06e+06	2.4218	8.87779	1.23596	5.29688	3.002	0.341203	2.73577	0.911314	1892.45	44.8666	1868.36	25.6465	1842.43	22.3711	1842.43	22.3711	102.715	1842.43	200.034	484.443	1842.43	2.4218
He3-JH16S6-May2-Spot 191	187.847	148168	1.97889	8.83666	1.17748	4.90663	3.16459	0.3146	2.93737	0.928201	1763.31	45.3159	1803.4	26.6987	1850.84	21.2907	1850.84	21.2907	95.2708	1850.84	94.9257	187.847	1850.84	1.97889
He3-JH16S6-May2-Spot 198	785.616	576407	6.62074	8.83128	1.17585	4.81517	3.00833	0.308549	2.76901	0.920447	1733.56	42.0903	1787.55	25.2985	1851.94	21.2585	1851.94	21.2585	93.608	1851.94	118.66	785.616	1851.94	6.62074
He3-JH16S6-May2-Spot 97	157.033	39866.6	0.541406	8.80689	0.90199	5.27308	2.17423	0.336957	1.9783	0.909887	1872.01	32.1419	1864.51	18.5595	1856.93	16.2968	1856.93	16.2968	100.812	1856.93	290.047	157.033	1856.93	0.541406
He3-JH16S6-May2-Spot 94	89.3856	117565	0.841244	8.79785	1.1876	5.28621	3.14387	0.33745	2.91093	0.925907	1874.39	47.3467	1866.64	26.8504	1858.79	21.4531	1858.79	21.4531	100.839	1858.79	106.254	89.3856	1858.79	0.841244
He3-JH16S6-May2-Spot 120	281.476	122980	2.29754	8.79147	1.13501	5.06077	2.72207	0.322824	2.47415	0.908922	1803.51	38.9237	1829.56	23.0831	1860.1	20.4997	1860.1	20.4997	96.9577	1860.1	122.511	281.476	1860.1	2.29754
He3-JH16S6-May2-Spot 57	577.159	1.90914e+06	2.21697	8.75264	1.09209	4.90361	2.81236	0.311417	2.59166	0.921525	1747.68	39.6738	1802.88	23.7235	1868.09	19.7054	1868.09	19.7054	93.5543	1868.09	260.337	577.159	1868.09	2.21697
He3-JH16S6-May2-Spot 214	275.16	442511	5.54109	8.69847	1.00081	5.30015	2.97142	0.334518	2.7978	0.941572	1860.24	45.2103	1868.89	25.3876	1879.28	18.0339	1879.28	18.0339	98.9867	1879.28	49.6582	275.16	1879.28	5.54109
He3-JH16S6-May2-Spot 207	192.581	687978	3.35655	8.67746	1.17041	5.19005	2.93024	0.326777	2.68634	0.916766	1822.74	42.652	1850.98	24.9515	1883.64	21.0794	1883.64	21.0794	96.767	1883.64	57.3746	192.581	1883.64	3.35655
He3-JH16S6-May2-Spot 16	333.412	307457	2.70795	8.67385	1.23918	5.19023	2.92712	0.326653	2.65188	0.905969	1822.14	42.0928	1851.02	24.9252	1884.39	22.3161	1884.39	22.3161	96.6964	1884.39	123.123	333.412	1884.39	2.70795
He3-JH16S6-May2-Spot 278	384.918	225291	5.25208	8.66901	1.23081	5.22499	3.10644	0.328657	2.8522	0.918158	1831.87	45.4815	1856.7	26.4812	1885.4	22.1628	1885.4	22.1628	97.1608	1885.4	73.2888	384.918	1885.4	5.25208
He3-JH16S6-May2-Spot 240	428.49	213732	3.15001	8.66772	1.26947	5.29937	2.92753	0.333286	2.63798	0.901091	1854.29	42.5098	1868.76	25.0119	1885.67	22.8582	1885.67	22.8582	98.3359	1885.67	136.028	428.49	1885.67	3.15001
He3-JH16S6-May2-Spot 258	258.198	879514	2.63508	8.65423	1.28811	5.29084	3.91848	0.332232	3.70071	0.944425	1849.19	59.4946	1867.39	33.475	1888.47	23.1862	1888.47	23.1862	97.92	1888.47	97.9847	258.198	1888.47	2.63508
He3-JH16S6-May2-Spot 267	655.658	5.81265e+06	4.37793	8.58929	0.913671	5.06138	2.46405	0.315438	2.28839	0.928712	1767.41	35.375	1829.66	20.8948	1902.01	16.4187	1902.01	16.4187	92.9233	1902.01	149.764	655.658	1902.01	4.37793
He3-JH16S6-May2-Spot 45	160.175	104137	1.22133	8.40473	1.40873	5.82695	3.5228	0.355347	3.22887	0.916564	1960.08	54.5736	1950.43	30.5396	1940.95	25.198	1940.95	25.198	100.986	1940.95	131.148	160.175	1940.95	1.22133
He3-JH16S6-May2-Spot 243	1089.4	968918	13.7447	8.39461	1.09071	5.13025	3.0699	0.312483	2.86961	0.934755	1752.92	44.0434	1841.13	26.0922	1943.11	19.5054	1943.11	19.5054	90.2118	1943.11	79.2601	1089.4	1943.11	13.7447
He3-JH16S6-May2-Spot 224	982.32	9.08159e+06	3.55121	8.35655	1.49149	5.82013	3.30822	0.352897	2.95292	0.892602	1948.41	49.6549	1949.41	28.6734	1951.23	26.6466	1951.23	26.6466	99.8555	1951.23	276.615	982.32	1951.23	3.55121
He3-JH16S6-May2-Spot 292	293.499	280192	3.67782	8.29655	1.18935	5.93577	2.86427	0.357324	2.60566	0.909713	1969.48	44.2203	1966.49	24.895	1964.09	21.2172	1964.09	21.2172	100.274	1964.09	79.8023	293.499	1964.09	3.67782
He3-JH16S6-May2-Spot 32	525.373	1.47264e+06	1.62461	8.2624	1.30981	5.33167	3.37928	0.319637	3.11512	0.921827	1787.96	48.6411	1873.95	28.9013	1971.45	23.3464	1971.45	23.3464	90.6925	1971.45	323.384	525.373	1971.45	1.62461
He3-JH16S6-May2-Spot 222	249.242	92435.6	2.79039	8.23866	1.34741	5.57925	2.65582	0.333519	2.28864	0.861745	1855.41	36.8995	1912.9	22.8718	1976.58	24.0002	1976.58	24.0002	93.87	1976.58	89.3214	249.242	1976.58	2.79039
He3-JH16S6-May2-Spot 147	652.539	294460	7.17505	8.00815	1.05504	6.36945	2.95878	0.370102	2.76428	0.934265	2029.88	48.1368	2028.07	25.9719	2026.98	18.6839	2026.98	18.6839	100.143	2026.98	90.9457	652.539	2026.98	7.17505
He3-JH16S6-May2-Spot 263	143.552	201528	1.71535	7.97352	1.56003	6.31018	3.7854	0.365073	3.44899	0.911131	2006.18	59.463	2019.87	33.1902	2034.65	27.6044	2034.65	27.6044	98.6005	2034.65	83.6867	143.552	2034.65	1.71535
He3-JH16S6-May2-Spot 189	798.387	724518	2.54999	7.97157	1.30161	5.99907	2.72105	0.346989	2.38954	0.878169	1920.21	39.6816	1975.71	23.6858	2035.08	23.0299	2035.08	23.0299	94.3551	2035.08	313.094	798.387	2035.08	2.54999
He3-JH16S6-May2-Spot 126	221.063	1.4246e+06	1.06539	7.77826	1.0856	6.53633	3.47232	0.368896	3.29825	0.949871	2024.21	57.2991	2050.81	30.5883	2078.4	19.1126	2078.4	19.1126	97.3923	2078.4	207.494	221.063	2078.4	1.06539
He3-JH16S6-May2-Spot 170	358.2	764821	1.89751	7.4672	1.43731	7.26312	3.33309	0.393521	3.00726	0.902245	2139.14	54.7463	2144.29	29.7564	2149.97	25.1038	2149.97	25.1038	99.4964	2149.97	188.774	358.2	2149.97	1.89751
He3-JH16S6-May2-Spot 201	244.167	203826	1.35589	7.43007	1.12239	6.58691	2.94057	0.355109	2.71794	0.92429	1958.95	45.9148	2057.6	25.9282	2158.67	19.5836	2158.67	19.5836	90.7481	2158.67	180.079	244.167	2158.67	1.35589
He3-JH16S6-May2-Spot 10	846.187	1.55908e+06	1.9437	6.9385	1.28625	8.12649	2.422	0.409125	2.05224	0.84733	2210.92	38.4111	2245.2	21.9014	2277.32	22.1556	2277.32	22.1556	97.0841	2277.32	435.348	846.187	2277.32	1.9437
He3-JH16S6-May2-Spot 95	413.072	179250	1.79219	6.51036	1.39116	8.88746	3.6387	0.419828	3.36227	0.924029	2259.7	64.0914	2326.51	33.2219	2386.39	23.6903	2386.39	23.6903	94.6909	2386.39	230.484	413.072	2386.39	1.79219
He3-JH16S6-May2-Spot 127	761.444	100646	3.47001	6.46002	1.24567	8.3444	3.05851	0.391126	2.79334	0.913303	2128.05	50.6293	2269.16	27.739	2399.6	21.1835	2399.6	21.1835	88.6833	2399.6	219.436	761.444	2399.6	3.47001
He3-JH16S6-May2-Spot 3	347.551	496389	2.18837	6.38153	1.15965	9.08509	3.68225	0.42067	3.49488	0.949115	2263.52	66.7135	2346.61	33.6939	2420.37	19.6784	2420.37	19.6784	93.5196	2420.37	158.817	347.551	2420.37	2.18837
He3-JH16S6-May2-Spot 17	424.591	36123.5	1.16113	6.3104	1.30879	8.72237	2.31491	0.399374	1.90941	0.824834	2166.15	35.1292	2309.42	21.0906	2439.37	22.1668	2439.37	22.1668	88.7997	2439.37	365.67	424.591	2439.37	1.16113
He3-JH16S6-May2-Spot 107	228.22	192671	1.88671	6.29203	1.196	10.1024	4.09171	0.461214	3.91301	0.956327	2444.92	79.6233	2444.19	37.8219	2444.31	20.2459	2444.31	20.2459	100.025	2444.31	120.962	228.22	2444.31	1.88671
He3-JH16S6-May2-Spot 295	541.236	7.93223e+06	2.0501	6.24641	1.15891	9.71143	2.99088	0.440151	2.75722	0.921877	2351.31	54.3242	2407.79	27.5404	2456.62	19.5935	2456.62	19.5935	95.7134	2456.62	264.004	541.236	2456.62	2.0501
He3-JH16S6-May2-Spot 34	44.4297	109666	0.984113	6.21398	1.12867	10.4533	2.41677	0.471313	2.13702	0.884248	2489.32	44.1304	2475.78	22.4005	2465.42	19.0652	2465.42	19.0652	100.969	2465.42	45.1469	44.4297	2465.42	0.984113
He3-JH16S6-May2-Spot 14	457.007	1.49562e+06	1.62703	6.19879	1.0228	9.9198	2.91031	0.446167	2.72466	0.93621	2378.19	54.19	2427.35	26.8508	2469.54	17.2694	2469.54	17.2694	96.3008	2469.54	280.885	457.007	2469.54	1.62703
He3-JH16S6-May2-Spot 104	586.066	267984	1.26214	6.18104	1.18997	8.96994	3.41047	0.40229	3.19614	0.937154	2179.57	59.1095	2334.95	31.1658	2474.39	20.0828	2474.39	20.0828	88.0855	2474.39	464.342	586.066	2474.39	1.26214
He3-JH16S6-May2-Spot 136	775.662	57313.7	2.22818	6.17987	1.26406	8.67897	2.90948	0.389166	2.62054	0.90069	2118.96	47.3258	2304.87	26.4962	2474.71	21.3328	2474.71	21.3328	85.6247	2474.71	348.115	775.662	2474.71	2.22818
He3-JH16S6-May2-Spot 146	165.253	164898	0.35841	6.17956	1.29894	10.3101	3.04503	0.462284	2.75408	0.904451	2449.64	56.1284	2463.01	28.1922	2474.79	21.9214	2474.79	21.9214	98.9835	2474.79	461.071	165.253	2474.79	0.35841
He3-JH16S6-May2-Spot 164	170.944	114528	1.37421	6.14478	1.32379	10.661	3.05382	0.475324	2.75198	0.90116	2506.87	57.1581	2494.03	28.3562	2484.31	22.3195	2484.31	22.3195	100.908	2484.31	124.395	170.944	2484.31	1.37421
He3-JH16S6-May2-Spot 139	252.061	1.23644e+07	2.34386	6.11448	1.23429	10.58	2.6143	0.46939	2.30458	0.881529	2480.88	47.4586	2486.96	24.2575	2492.64	20.7928	2492.64	20.7928	99.5282	2492.64	107.541	252.061	2492.64	2.34386
He3-JH16S6-May2-Spot 236	415.51	346825	1.72023	6.10721	1.22872	10.1061	2.29862	0.447829	1.94266	0.84514	2385.59	38.736	2444.52	21.2414	2494.65	20.6947	2494.65	20.6947	95.6285	2494.65	241.543	415.51	2494.65	1.72023
He3-JH16S6-May2-Spot 173	716.788	51626.3	2.29081	6.09784	1.23518	10.0892	3.11556	0.446395	2.86026	0.918054	2379.21	56.9072	2442.98	28.7898	2497.23	20.7983	2497.23	20.7983	95.2737	2497.23	312.898	716.788	2497.23	2.29081
He3-JH16S6-May2-Spot 300	370.056	6.05124e+06	0.796864	6.04292	1.25251	10.3606	2.47858	0.454274	2.13882	0.862922	2414.23	43.0696	2467.53	22.9557	2512.45	21.0583	2512.45	21.0583	96.0905	2512.45	464.391	370.056	2512.45	0.796864
He3-JH16S6-May2-Spot 269	400.587	127631	2.06561	6.03075	1.13325	10.4549	3.34267	0.457487	3.14471	0.940778	2428.45	63.6337	2475.93	30.9875	2515.84	19.0462	2515.84	19.0462	96.5265	2515.84	193.932	400.587	2515.84	2.06561
He3-JH16S6-May2-Spot 273	464.708	75296.3	1.32384	6.02006	1.33822	10.4268	3.245	0.455451	2.95621	0.911005	2419.44	59.6363	2473.44	30.0745	2518.82	22.4854	2518.82	22.4854	96.0546	2518.82	351.029	464.708	2518.82	1.32384
He3-JH16S6-May2-Spot 87	314.291	695872	1.67986	5.98031	1.26503	10.7623	3.23425	0.467	2.97659	0.920334	2470.39	61.0853	2502.82	30.0568	2529.95	21.2319	2529.95	21.2319	97.6458	2529.95	187.093	314.291	2529.95	1.67986
He3-JH16S6-May2-Spot 79	576.352	6.74522e+06	6.16336	5.97846	1.19679	10.7037	3.43526	0.464316	3.22005	0.937352	2458.58	65.8224	2497.75	31.9112	2530.47	20.0883	2530.47	20.0883	97.1593	2530.47	93.5125	576.352	2530.47	6.16336
He3-JH16S6-May2-Spot 142	271.14	296728	1.36557	5.97311	1.18201	10.7624	3.18934	0.466441	2.96222	0.928788	2467.94	60.7409	2502.83	29.6393	2531.97	19.8372	2531.97	19.8372	97.4709	2531.97	198.554	271.14	2531.97	1.36557
He3-JH16S6-May2-Spot 21	137.424	814113	0.932043	5.93912	1.31781	11.1084	2.99565	0.478697	2.69022	0.898043	2521.59	56.1434	2532.26	27.9122	2541.54	22.0926	2541.54	22.0926	99.2149	2541.54	147.444	137.424	2541.54	0.932043
He3-JH16S6-May2-Spot 124	15.5574	49557.3	0.580998	5.72286	1.2671	11.1045	3.57703	0.461104	3.34508	0.935158	2444.43	68.0548	2531.93	33.3319	2603.53	21.1144	2603.53	21.1144	93.889	2603.53	26.777	15.5574	2603.53	0.580998
He3-JH16S6-May2-Spot 279	256.203	788679	2.54683	5.64573	1.06745	10.832	2.22381	0.443727	1.95086	0.877263	2367.3	38.6528	2508.81	20.6746	2626.12	17.7481	2626.12	17.7481	90.1444	2626.12	100.597	256.203	2626.12	2.54683
He3-JH16S6-May2-Spot 257	549.439	220644	1.58589	5.51888	1.03711	11.1888	2.97745	0.448044	2.79099	0.937375	2386.55	55.6706	2538.98	27.7591	2663.84	17.1851	2663.84	17.1851	89.5908	2663.84	346.454	549.439	2663.84	1.58589
He3-JH16S6-May2-Spot 114	573.184	692847	4.39002	5.46079	1.0963	12.4118	2.00272	0.491789	1.67601	0.836867	2578.41	35.618	2636.07	18.8212	2681.35	18.1325	2681.35	18.1325	96.1608	2681.35	130.565	573.184	2681.35	4.39002
He3-JH16S6-May2-Spot 50	615.373	751092	2.54738	5.3346	1.31944	13.771	3.68019	0.533035	3.43554	0.933521	2754.23	77.0082	2734.09	34.8519	2719.95	21.7454	2719.95	21.7454	101.26	2719.95	241.571	615.373	2719.95	2.54738
He3-JH16S6-May2-Spot 132	760.037	2.04257e+06	2.46548	5.25222	1.07869	14.2672	2.59165	0.543712	2.3565	0.909265	2798.97	53.5054	2767.64	24.5963	2745.57	17.7348	2745.57	17.7348	101.945	2745.57	308.272	760.037	2745.57	2.46548
He3-JH16S6-May2-Spot 42	53.7846	393152	1.78131	3.91157	1.18706	23.4264	2.69124	0.664882	2.41529	0.897466	3286.09	62.1817	3244.82	26.2135	3220.09	18.7395	3220.09	18.7395	102.049	3220.09	30.1938	53.7846	3220.09	1.78131
Notes: see Table S5a

## Sheet: A4
Table S5d. U-Pb geochronologic analyses.		JHPM16-A4
							Isotope ratios						Apparent ages (Ma)
Analysis	U	206Pb	U/Th	206Pb*	±	207Pb*	±	206Pb*	±	error	206Pb*	±	207Pb*	±	206Pb*	±	Best age	±	Conc
	(ppm)	204Pb		207Pb*	(%)	235U*	(%)	238U	(%)	corr.	238U*	(Ma)	235U	(Ma)	207Pb*	(Ma)	(Ma)	(Ma)	(%)
He10-JH16A4-May2-Spot 138	2025.92	1209.84	0.678825	7.19132	3.4573	0.653718	4.31691	0.0341104	2.58511	0.598834	216.223	5.49689	510.764	17.329	2215.48	59.966	216.223	5.49689	NA
He10-JH16A4-May2-Spot 229	501.087	4.7055e+06	2.83688	19.547	1.56788	0.24587	3.13516	0.0348718	2.71495	0.865971	220.967	5.89751	223.216	6.28243	247.988	36.1041	220.967	5.89751	NA
He10-JH16A4-May2-Spot 136	77.9353	13616.5	1.0131	19.3563	1.95316	0.250667	3.37557	0.0352051	2.75312	0.815601	223.043	6.03564	227.118	6.86972	270.494	44.7695	223.043	6.03564	NA
He10-JH16A4-May2-Spot 83	226.163	12895.4	2.07311	20.0861	1.7666	0.241941	2.94744	0.0352609	2.35935	0.800474	223.391	5.1803	220.009	5.83027	184.974	41.1306	223.391	5.1803	NA
He10-JH16A4-May2-Spot 304	501.249	340269	1.54854	19.5623	1.3965	0.253832	3.90973	0.0360291	3.65182	0.934033	228.172	8.18671	229.684	8.03698	246.184	32.1601	228.172	8.18671	NA
He10-JH16A4-May2-Spot 261	564.331	74505.4	1.69017	19.4319	1.15313	0.258222	2.79728	0.0364079	2.54854	0.911079	230.529	5.77132	233.233	5.82917	261.553	26.4775	230.529	5.77132	NA
He10-JH16A4-May2-Spot 31	207.074	7188.62	0.527928	19.4217	1.52857	0.26321	3.95914	0.0370918	3.65216	0.922463	234.781	8.42032	237.25	8.37659	262.75	35.0991	234.781	8.42032	NA
He10-JH16A4-May2-Spot 163	144.09	26478.3	1.614	19.2381	1.61127	0.266209	3.15868	0.0371596	2.71681	0.86011	235.203	6.27486	239.658	6.74308	284.556	36.8627	235.203	6.27486	NA
He10-JH16A4-May2-Spot 50	492.412	49804.1	2.02752	19.3835	1.26185	0.26557	2.94861	0.0373508	2.66497	0.903804	236.391	6.18564	239.146	6.2827	267.31	28.9561	236.391	6.18564	NA
He10-JH16A4-May2-Spot 119	673.176	66433.7	1.98471	18.8552	1.5265	0.274383	3.8468	0.0375385	3.53096	0.917895	237.557	8.23537	246.192	8.41002	330.305	34.6056	237.557	8.23537	NA
He10-JH16A4-May2-Spot 26	699.453	38438.6	2.90648	19.5565	1.23531	0.265795	3.35368	0.037716	3.11788	0.92969	238.66	7.30508	239.326	7.1506	246.895	28.4349	238.66	7.30508	NA
He10-JH16A4-May2-Spot 228	625.683	68737.2	2.62584	18.5157	1.35028	0.282787	3.64446	0.0379916	3.38509	0.928831	240.372	7.98696	252.866	8.15789	371.374	30.3868	240.372	7.98696	NA
He10-JH16A4-May2-Spot 208	274.308	16414.5	2.30723	19.163	1.10898	0.275653	3.08299	0.0383277	2.87663	0.933065	242.459	6.84512	247.203	6.76454	293.476	25.3222	242.459	6.84512	NA
He10-JH16A4-May2-Spot 226	99.465	7271.48	1.50718	19.2872	2.5652	0.273907	3.63856	0.0383318	2.58048	0.709203	242.485	6.14104	245.812	7.94389	278.729	58.7205	242.485	6.14104	NA
He10-JH16A4-May2-Spot 233	726.927	192572	1.82266	19.7197	1.14408	0.268396	3.11893	0.038403	2.90152	0.930293	242.926	6.91741	241.411	6.70138	227.723	26.44	242.926	6.91741	NA
He10-JH16A4-May2-Spot 110	233.976	4619.37	1.37922	20.3566	2.72482	0.262121	3.75486	0.0387164	2.58347	0.688034	244.872	6.20754	236.374	7.91831	153.776	63.8332	244.872	6.20754	NA
He10-JH16A4-May2-Spot 144	230.519	9119.25	1.47214	19.8867	2.40894	0.268321	3.34739	0.0387174	2.32422	0.694339	244.878	5.58476	241.351	7.19066	208.157	55.8684	244.878	5.58476	NA
He10-JH16A4-May2-Spot 176	512.541	73646.2	2.68599	19.546	1.10109	0.278286	3.02889	0.0394672	2.82166	0.931582	249.53	6.90634	249.297	6.69549	248.087	25.3306	249.53	6.90634	NA
He10-JH16A4-May2-Spot 1	99.8517	8272.41	1.85585	19.5567	1.48974	0.278816	3.11485	0.039564	2.73551	0.878213	250.13	6.71127	249.718	6.89578	246.871	34.3258	250.13	6.71127	NA
He10-JH16A4-May2-Spot 22	170.089	5693.89	1.88396	19.9686	1.46554	0.280848	2.70026	0.0406917	2.26794	0.839899	257.119	5.71655	251.33	6.01192	198.659	34.0436	257.119	5.71655	NA
He10-JH16A4-May2-Spot 143	236.031	4332.72	1.2909	13.2095	2.30634	0.425626	3.62399	0.0407946	2.79538	0.771353	257.757	7.06312	360.066	10.9864	1087.22	46.2326	257.757	7.06312	NA
He10-JH16A4-May2-Spot 133	261.097	11908.2	2.71147	16.8383	1.71701	0.334557	2.91053	0.0408747	2.35012	0.807453	258.253	5.94928	293.039	7.40871	581.373	37.2853	258.253	5.94928	NA
He10-JH16A4-May2-Spot 118	612.092	2254.95	2.03326	10.9343	4.36734	0.518808	6.07039	0.041161	4.21615	0.694544	260.026	10.7449	424.355	21.0578	1456.08	83.1013	260.026	10.7449	NA
He10-JH16A4-May2-Spot 217	267.755	27647	1.18817	18.7487	1.31957	0.305538	3.69475	0.0415646	3.45107	0.934048	262.524	8.87789	270.717	8.78014	343.157	29.8506	262.524	8.87789	NA
He10-JH16A4-May2-Spot 209	109.546	178533	1.63502	18.4459	2.11808	0.313436	3.17643	0.0419505	2.36716	0.745227	264.912	6.1438	276.841	7.69693	379.864	47.6307	264.912	6.1438	NA
He10-JH16A4-May2-Spot 35	103.134	22327.2	2.52356	19.0612	1.67839	0.306975	2.78581	0.0424563	2.22345	0.798136	268.04	5.83755	271.833	6.64389	305.621	38.2643	268.04	5.83755	NA
He10-JH16A4-May2-Spot 298	347.792	76760.4	0.668597	19.0472	1.42211	0.312441	3.22499	0.0431804	2.89451	0.897525	272.517	7.72361	276.071	7.79569	307.284	32.4142	272.517	7.72361	NA
He10-JH16A4-May2-Spot 19	82.9109	7373.04	2.335	19.3031	1.93775	0.309274	3.05775	0.0433169	2.36537	0.773565	273.36	6.33081	273.618	7.3342	276.844	44.4022	273.36	6.33081	NA
He10-JH16A4-May2-Spot 84	233.469	14001.7	2.70733	19.4439	1.64214	0.308018	2.91715	0.0434558	2.41105	0.826508	274.218	6.47289	272.643	6.97522	260.169	37.7259	274.218	6.47289	NA
He10-JH16A4-May2-Spot 244	211.672	12946.6	1.29666	19.2871	1.57533	0.311136	3.20737	0.0435417	2.79385	0.87107	274.749	7.51478	275.061	7.72841	278.737	36.0723	274.749	7.51478	NA
He10-JH16A4-May2-Spot 52	318.451	13413.1	1.33052	19.3041	1.05785	0.312266	2.84995	0.0437383	2.64635	0.92856	275.963	7.14884	275.936	6.88615	276.725	24.2271	275.963	7.14884	NA
He10-JH16A4-May2-Spot 47	67.3105	2724.64	1.09924	20.1184	1.82749	0.304943	3.46618	0.0445143	2.94528	0.849719	280.754	8.09151	270.253	8.22464	181.234	42.6081	280.754	8.09151	NA
He10-JH16A4-May2-Spot 72	214.759	76836.3	3.56743	18.8839	1.40563	0.326069	3.17425	0.0446776	2.84606	0.896608	281.762	7.84638	286.56	7.92543	326.877	31.8839	281.762	7.84638	NA
He10-JH16A4-May2-Spot 286	263.804	53691.8	1.49954	19.1068	1.19021	0.324378	2.66514	0.0449705	2.38461	0.894741	283.569	6.61544	285.265	6.62819	300.198	27.1613	283.569	6.61544	NA
He10-JH16A4-May2-Spot 306	59.3013	5757.4	3.32513	18.2212	2.38698	0.340164	3.21594	0.0449731	2.15513	0.67014	283.585	5.97916	297.296	8.28854	407.362	53.4109	283.585	5.97916	NA
He10-JH16A4-May2-Spot 315	109.224	56092.2	1.30452	18.569	1.73614	0.334268	3.00502	0.0450371	2.45274	0.816216	283.98	6.81411	292.819	7.64428	364.898	39.1433	283.98	6.81411	NA
He10-JH16A4-May2-Spot 122	786.428	191605	1.60953	19.0101	1.06508	0.328839	3.21719	0.0453582	3.03577	0.94361	285.961	8.49138	288.679	8.08399	311.719	24.2209	285.961	8.49138	NA
He10-JH16A4-May2-Spot 76	474.699	60156.6	2.39227	19.07	1.24427	0.32848	3.17958	0.0454512	2.92601	0.92025	286.534	8.20043	288.404	7.98294	304.556	28.3672	286.534	8.20043	NA
He10-JH16A4-May2-Spot 294	58.4698	5214.36	1.81327	20.2719	2.57591	0.309285	3.46351	0.0454928	2.3153	0.668483	286.79	6.49452	273.627	8.30772	163.49	60.2107	286.79	6.49452	NA
He10-JH16A4-May2-Spot 264	1312.11	8234.07	1.60249	16.0169	1.30699	0.39406	2.92411	0.0457961	2.61576	0.894549	288.66	7.3841	337.331	8.39296	688.995	27.8676	288.66	7.3841	NA
He10-JH16A4-May2-Spot 14	542.903	261157	1.30571	19.0721	1.07498	0.332126	3.21002	0.0459611	3.02467	0.94226	289.677	8.56784	291.188	8.12652	304.308	24.483	289.677	8.56784	NA
He10-JH16A4-May2-Spot 300	186.204	6657.4	0.998296	19.2789	1.66867	0.328573	3.05173	0.0459623	2.55512	0.837268	289.685	7.23794	288.476	7.66357	279.716	38.1852	289.685	7.23794	NA
He10-JH16A4-May2-Spot 36	317.546	9326.38	2.04005	19.2764	1.9522	0.333627	3.1895	0.0466633	2.52227	0.790802	294.003	7.24898	292.331	8.10193	280.008	44.6724	294.003	7.24898	NA
He10-JH16A4-May2-Spot 21	356.748	65438.5	2.67968	18.6869	1.22836	0.35174	2.85421	0.0476921	2.57636	0.902653	300.337	7.56028	306.029	7.5414	350.613	27.7421	300.337	7.56028	NA
He10-JH16A4-May2-Spot 168	487.601	106020	3.88708	19.0689	0.976914	0.344805	2.82811	0.0477075	2.65403	0.938445	300.432	7.79058	300.807	7.36289	304.732	22.2492	300.432	7.79058	NA
He10-JH16A4-May2-Spot 285	402.153	26153.8	2.56924	18.9768	1.22229	0.347582	2.75034	0.0478594	2.46381	0.895822	301.366	7.25421	302.901	7.20319	315.711	27.8004	301.366	7.25421	NA
He10-JH16A4-May2-Spot 224	191.865	9096.17	1.75644	18.0473	1.63546	0.367001	3.19069	0.0480582	2.73967	0.858644	302.589	8.09839	317.428	8.69808	428.777	36.4633	302.589	8.09839	NA
He10-JH16A4-May2-Spot 159	239.546	26396	1.48915	18.4938	1.52843	0.358479	2.88863	0.0481035	2.45114	0.848547	302.868	7.25201	311.079	7.74	374.041	34.3821	302.868	7.25201	NA
He10-JH16A4-May2-Spot 70	299.369	62297.3	2.44032	18.879	1.46069	0.352494	3.22148	0.0482857	2.87129	0.891296	303.988	8.52577	306.595	8.52534	327.457	33.1436	303.988	8.52577	NA
He10-JH16A4-May2-Spot 271	29.6099	4053.24	2.32579	19.284	3.51704	0.34628	4.79727	0.0484519	3.26254	0.680084	305.01	9.71934	301.919	12.5296	279.114	80.5162	305.01	9.71934	NA
He10-JH16A4-May2-Spot 199	278.581	31139.9	26.0096	18.544	1.51097	0.361082	3.08964	0.0485844	2.69497	0.872258	305.825	8.04943	313.022	8.3228	367.934	34.0437	305.825	8.04943	NA
He10-JH16A4-May2-Spot 283	819.288	97251.9	2.77643	19.0825	1.36756	0.354904	3.44329	0.0491399	3.16006	0.917746	309.239	9.54147	308.403	9.15836	303.075	31.1952	309.239	9.54147	NA
He10-JH16A4-May2-Spot 288	166.429	12580.6	1.07403	16.8901	3.0272	0.402825	4.26397	0.0493669	3.00292	0.704253	310.634	9.10689	343.695	12.4331	574.711	65.8465	310.634	9.10689	NA
He10-JH16A4-May2-Spot 120	305.025	31895.1	1.13764	19.1675	1.53942	0.358338	3.37056	0.0498364	2.99848	0.889608	313.517	9.17581	310.973	9.02877	292.936	35.133	313.517	9.17581	NA
He10-JH16A4-May2-Spot 108	79.3724	28882.7	2.86072	18.679	1.73257	0.369148	3.41894	0.0500314	2.94743	0.862089	314.714	9.0532	319.021	9.36016	351.595	39.1439	314.714	9.0532	NA
He10-JH16A4-May2-Spot 145	131.711	6354.55	1.24669	19.5073	1.66566	0.356177	2.84944	0.0504139	2.31189	0.811352	317.062	7.15281	309.357	7.59882	252.691	38.2921	317.062	7.15281	NA
He10-JH16A4-May2-Spot 146	73.7869	14929	1.59993	18.9353	1.40295	0.378456	2.92881	0.0519967	2.57093	0.877806	326.769	8.19161	325.902	8.16494	320.723	31.9012	326.769	8.19161	NA
He10-JH16A4-May2-Spot 192	455.392	64456.6	1.85877	18.7555	1.27941	0.389962	2.46857	0.0530688	2.11114	0.85521	333.335	6.85833	334.342	7.03236	342.346	28.9532	333.335	6.85833	NA
He10-JH16A4-May2-Spot 276	114.931	23330.4	2.11417	19.5383	1.31623	0.377771	2.74297	0.0535553	2.40654	0.877348	336.312	7.88598	325.397	7.63678	249.015	30.3181	336.312	7.88598	NA
He10-JH16A4-May2-Spot 191	213.539	9321.64	0.912645	18.9509	1.50207	0.406186	2.51901	0.0558524	2.02217	0.802766	350.352	6.89566	346.125	7.38838	318.813	34.143	350.352	6.89566	NA
He10-JH16A4-May2-Spot 246	242.319	9809.69	1.89135	18.4816	1.51885	0.421595	2.8532	0.0565357	2.41533	0.846535	354.522	8.3317	357.191	8.59195	375.521	34.1692	354.522	8.3317	NA
He10-JH16A4-May2-Spot 7	66.5833	4326.5	0.931048	18.9219	2.25088	0.444982	3.1397	0.0610935	2.18889	0.697167	382.272	8.12427	373.759	9.81773	322.33	51.1364	382.272	8.12427	NA
He10-JH16A4-May2-Spot 274	131.927	40170.8	1.40402	18.0456	1.45618	0.474517	2.5766	0.0621315	2.12565	0.824984	388.575	8.01574	394.304	8.41953	428.985	32.464	388.575	8.01574	NA
He10-JH16A4-May2-Spot 57	408.936	65589.7	1.04686	17.777	1.05635	0.486157	2.97937	0.062708	2.78582	0.935035	392.074	10.5969	402.288	9.89647	462.324	23.4137	392.074	10.5969	NA
He10-JH16A4-May2-Spot 303	417.661	72942.8	1.05396	18.1694	1.24145	0.480876	2.91554	0.0633961	2.63802	0.904815	396.246	10.1383	398.674	9.61338	413.723	27.7496	396.246	10.1383	NA
He10-JH16A4-May2-Spot 279	511.402	9766.82	1.48497	15.347	2.66851	0.569703	4.01959	0.0634395	3.00603	0.747843	396.509	11.56	457.823	14.8141	779.466	56.1151	396.509	11.56	NA
He10-JH16A4-May2-Spot 204	369.267	50561.9	2.60452	18.2976	1.08536	0.482287	2.99419	0.0640307	2.79055	0.931988	400.092	10.8254	399.641	9.89228	397.99	24.327	400.092	10.8254	100.528
He10-JH16A4-May2-Spot 307	59.3189	10357	30.4946	18.2235	1.55205	0.490672	3.29855	0.0648802	2.91059	0.882386	405.236	11.4317	405.369	11.025	407.074	34.7335	405.236	11.4317	99.5487
He10-JH16A4-May2-Spot 193	93.954	37267.1	0.785754	18.259	1.50554	0.494529	2.9826	0.0655173	2.57473	0.863251	409.092	10.2058	407.992	10.0214	402.727	33.7188	409.092	10.2058	101.58
He10-JH16A4-May2-Spot 237	303.241	27763.4	2.43905	17.6777	1.25725	0.517385	2.6196	0.0663633	2.29818	0.877301	414.208	9.21986	423.403	9.06972	474.728	27.8287	414.208	9.21986	87.2517
He10-JH16A4-May2-Spot 150	106.505	8094.77	1.81297	18.2471	1.71629	0.506221	3.40708	0.0670228	2.94322	0.863855	418.194	11.9176	415.905	11.6274	404.181	38.4295	418.194	11.9176	103.467
He10-JH16A4-May2-Spot 68	483.363	50567.7	5.17319	17.972	1.09695	0.518773	2.5353	0.0676491	2.28571	0.901551	421.977	9.33625	424.331	8.79336	438.089	24.4373	421.977	9.33625	96.3221
He10-JH16A4-May2-Spot 164	148.907	21289.7	1.96538	17.8788	1.16936	0.525981	2.52226	0.0682331	2.23482	0.886036	425.502	9.20215	429.139	8.8278	449.66	25.997	425.502	9.20215	94.6274
He10-JH16A4-May2-Spot 243	87.2626	37243.3	1.42223	17.3153	1.44017	0.547355	2.7509	0.0687682	2.3438	0.85201	428.73	9.72172	443.262	9.88094	520.356	31.5876	428.73	9.72172	82.3918
He10-JH16A4-May2-Spot 73	352.664	46055.7	2.55317	18.0146	1.12201	0.528839	2.44583	0.0691252	2.17329	0.88857	430.883	9.05826	431.039	8.59071	432.82	25.0088	430.883	9.05826	99.5525
He10-JH16A4-May2-Spot 79	395.972	61652.2	2.39393	17.964	0.927173	0.535177	2.70546	0.0697571	2.54163	0.939443	434.692	10.684	435.24	9.57686	439.085	20.6434	434.692	10.684	98.9994
He10-JH16A4-May2-Spot 85	502.945	70028.2	2.3359	17.8885	1.15017	0.539612	3.50618	0.0700397	3.31216	0.944664	436.395	13.9757	438.169	12.4783	448.447	25.5757	436.395	13.9757	97.3125
He10-JH16A4-May2-Spot 63	361.896	87066.4	1.5502	17.8342	1.18357	0.546001	3.18566	0.0706539	2.95763	0.928421	440.094	12.582	442.374	11.4244	455.239	26.2663	440.094	12.582	96.6732
He10-JH16A4-May2-Spot 139	1305.62	61961	3.15685	17.8107	0.9432	0.548925	2.15358	0.0709385	1.93605	0.89899	441.808	8.26707	444.292	7.74964	458.164	20.9209	441.808	8.26707	96.4299
He10-JH16A4-May2-Spot 184	100.149	14104.8	1.66877	17.5834	1.04783	0.561693	2.53155	0.0716622	2.30451	0.910318	446.162	9.93413	452.628	9.24552	486.569	23.1283	446.162	9.93413	91.6956
He10-JH16A4-May2-Spot 239	200.671	173519	1.38393	17.8051	0.94171	0.554958	2.43169	0.0716957	2.24194	0.921968	446.364	9.66862	448.239	8.81232	458.84	20.8852	446.364	9.66862	97.281
He10-JH16A4-May2-Spot 252	99.4706	16253.6	3.22148	17.9223	1.41073	0.559887	3.3636	0.0728085	3.05346	0.907796	453.054	13.3589	451.453	12.2592	444.254	31.3888	453.054	13.3589	101.981
He10-JH16A4-May2-Spot 256	186.718	28056.7	2.22839	17.5156	1.3539	0.574115	3.01228	0.0729647	2.69087	0.893301	453.992	11.7961	460.673	11.1559	495.103	29.825	453.992	11.7961	91.6966
He10-JH16A4-May2-Spot 310	950.696	868563	2.65998	17.5613	1.18446	0.58	3.09051	0.0739048	2.85452	0.923641	459.638	12.6637	464.462	11.5199	489.364	26.1112	459.638	12.6637	93.9255
He10-JH16A4-May2-Spot 77	50.5831	7541.64	0.724977	16.9401	1.77985	0.668494	2.55993	0.0821676	1.83994	0.718746	509.048	9.00593	519.796	10.4147	568.281	38.7236	509.048	9.00593	89.5768
He10-JH16A4-May2-Spot 290	107.246	132347	3.4189	17.2153	1.14264	0.663943	2.85992	0.0829341	2.62174	0.916718	513.612	12.9431	517.023	11.5876	533.092	25.0139	513.612	12.9431	96.3459
He10-JH16A4-May2-Spot 49	90.1483	38548.4	1.41842	17.0472	1.10742	0.674707	2.64204	0.0834556	2.39875	0.907915	516.716	11.911	523.57	10.8084	554.52	24.1471	516.716	11.911	93.1825
He10-JH16A4-May2-Spot 189	38.4776	18522.6	5.97313	17.3013	1.61523	0.670356	3.29757	0.0841536	2.8749	0.871822	520.868	14.3854	520.929	13.4384	522.13	35.4536	520.868	14.3854	99.7582
He10-JH16A4-May2-Spot 178	142.954	123381	1.26854	17.3251	1.36374	0.67171	3.54588	0.0844392	3.27315	0.923084	522.566	16.4295	521.751	14.4679	519.123	29.9459	522.566	16.4295	100.663
He10-JH16A4-May2-Spot 34	426.044	38560.2	1.23538	17.3178	0.929231	0.675674	2.81142	0.0849019	2.65342	0.943799	525.315	13.386	524.157	11.5113	520.046	20.3835	525.315	13.386	101.013
He10-JH16A4-May2-Spot 230	330.765	124602	1.91701	17.0522	1.19111	0.687192	3.26538	0.0850248	3.04039	0.931099	526.046	15.3587	531.112	13.5053	553.901	25.9696	526.046	15.3587	94.9711
He10-JH16A4-May2-Spot 96	451.666	64242.6	1.45185	17.2315	0.993125	0.681257	2.82709	0.0851767	2.64691	0.936267	526.948	13.393	527.534	11.6323	531.042	21.7639	526.948	13.393	99.229
He10-JH16A4-May2-Spot 107	101.754	9290.91	1.00059	17.3945	1.42715	0.676386	3.20201	0.0853676	2.86637	0.89518	528.082	14.5334	524.588	13.1189	510.364	31.393	528.082	14.5334	103.472
He10-JH16A4-May2-Spot 121	379.258	44000.2	2.8198	17.2341	1.04101	0.684353	2.99307	0.085577	2.8062	0.937566	529.325	14.2605	529.402	12.3485	530.707	22.7831	529.325	14.2605	99.7397
He10-JH16A4-May2-Spot 232	259.532	21003.5	0.618871	17.3367	1.40639	0.680781	3.74311	0.0856372	3.46886	0.92673	529.683	17.6394	527.246	15.3955	517.645	30.8993	529.683	17.6394	102.325
He10-JH16A4-May2-Spot 289	178.229	61879.9	1.22365	17.2903	1.24361	0.687462	2.50291	0.0862462	2.17209	0.867827	533.298	11.1175	531.274	10.3539	523.523	27.2727	533.298	11.1175	101.867
He10-JH16A4-May2-Spot 45	572.465	75619.4	37.1475	16.7128	0.931913	0.717441	2.56074	0.0870008	2.38514	0.931429	537.775	12.3063	549.155	10.8621	597.575	20.1845	537.775	12.3063	89.9929
He10-JH16A4-May2-Spot 24	316.462	74035	2.72624	16.9558	1.2392	0.710295	3.2988	0.0873865	3.0572	0.926761	540.062	15.8381	544.922	13.9117	566.266	27.0041	540.062	15.8381	95.3726
He10-JH16A4-May2-Spot 197	265.31	44547.3	1.3235	16.9479	1.22674	0.726181	2.93842	0.0892996	2.6701	0.908686	551.393	14.1107	554.309	12.5523	567.272	26.7127	551.393	14.1107	97.2009
He10-JH16A4-May2-Spot 235	986.297	136338	25.7014	16.8138	1.3022	0.738178	3.36596	0.0900566	3.10386	0.922133	555.872	16.5306	561.342	14.5156	584.499	28.2676	555.872	16.5306	95.1022
He10-JH16A4-May2-Spot 248	421.881	411271	2.07505	16.886	1.19645	0.736937	2.61304	0.0902912	2.32304	0.889016	557.259	12.4016	560.617	11.2575	575.218	25.9922	557.259	12.4016	96.8779
He10-JH16A4-May2-Spot 249	836.674	405901	18.137	16.6231	1.23807	0.755473	3.61235	0.0911208	3.39356	0.939433	562.162	18.2692	571.395	15.7863	609.222	26.7758	562.162	18.2692	92.2755
He10-JH16A4-May2-Spot 165	607.608	79070.3	34.292	16.9345	1.16987	0.742089	2.64198	0.0911833	2.36885	0.896619	562.532	12.7607	563.624	11.4278	569.005	25.4679	562.532	12.7607	98.8624
He10-JH16A4-May2-Spot 171	122.449	181587	0.857771	16.8964	1.36117	0.745409	2.80797	0.0913854	2.456	0.874652	563.725	13.257	565.557	12.177	573.888	29.581	563.725	13.257	98.2293
He10-JH16A4-May2-Spot 253	259.756	45634.4	1.64542	16.64	1.51175	0.759836	3.53034	0.0917405	3.19028	0.903676	565.823	17.2819	573.915	15.4785	607.016	32.7078	565.823	17.2819	93.2138
He10-JH16A4-May2-Spot 162	504.426	78239.1	3.48691	16.8929	1.1349	0.750545	3.24594	0.0919961	3.04107	0.936885	567.332	16.5156	568.541	14.1319	574.314	24.6732	567.332	16.5156	98.7842
He10-JH16A4-May2-Spot 41	113.059	60506.3	1.86513	16.6482	0.972382	0.775384	2.55797	0.093664	2.36594	0.92493	577.17	13.0621	582.847	11.344	605.949	21.0118	577.17	13.0621	95.2507
He10-JH16A4-May2-Spot 116	98.5926	72347.3	1.26098	16.7935	1.3751	0.775804	3.14179	0.0945326	2.82488	0.899131	582.288	15.728	583.087	13.9377	587.148	29.8378	582.288	15.728	99.1723
He10-JH16A4-May2-Spot 25	695.788	257734	9.57535	16.5583	1.35358	0.813205	3.16478	0.0977021	2.86071	0.90392	600.928	16.4139	604.25	14.413	617.651	29.2406	600.928	16.4139	97.2925
He10-JH16A4-May2-Spot 75	94.3791	23681.6	0.765929	16.5004	1.45616	0.819042	2.95013	0.098059	2.56572	0.869695	603.024	14.7703	607.514	13.4884	625.213	31.3893	603.024	14.7703	96.4509
He10-JH16A4-May2-Spot 112	464.752	23773.3	2.5816	15.6435	0.955713	0.869544	2.1344	0.0986993	1.90848	0.894151	606.782	11.052	635.319	10.0804	739.103	20.2229	606.782	11.052	82.0971
He10-JH16A4-May2-Spot 39	45.8253	7306.02	1.42847	16.481	2.28021	0.831238	3.35265	0.0994023	2.45782	0.733099	610.905	14.3255	614.299	15.4537	627.747	49.144	610.905	14.3255	97.3172
He10-JH16A4-May2-Spot 223	103.846	75679.2	1.23537	16.2777	1.60267	0.842674	2.96296	0.0995272	2.49211	0.841087	611.637	14.5419	620.62	13.7592	654.43	34.4087	611.637	14.5419	93.4611
He10-JH16A4-May2-Spot 38	415.868	4.15625e+06	3.75699	16.0521	1.11495	0.856288	3.02368	0.0997329	2.81061	0.929533	612.843	16.4313	628.094	14.1634	684.35	23.8047	612.843	16.4313	89.5512
He10-JH16A4-May2-Spot 160	194.624	20468	1.77797	16.5768	1.35338	0.841188	3.00186	0.101177	2.67946	0.892602	621.302	15.8705	619.801	13.9265	615.245	29.2273	621.302	15.8705	100.984
He10-JH16A4-May2-Spot 117	71.2173	8396.16	1.74415	16.5412	1.96715	0.846175	3.69089	0.101558	3.12298	0.846131	623.533	18.5608	622.548	17.1787	619.886	42.447	623.533	18.5608	100.588
He10-JH16A4-May2-Spot 268	181.816	51754.9	3.23644	16.3071	1.22635	0.858561	2.67892	0.101586	2.38174	0.889066	623.699	14.1589	629.337	12.5663	650.565	26.3407	623.699	14.1589	95.8702
He10-JH16A4-May2-Spot 312	93.7533	70641.8	12.4856	16.1786	1.31209	0.865838	2.94157	0.10164	2.63273	0.895008	624.014	15.6586	633.305	13.8611	667.558	28.0907	624.014	15.6586	93.4772
He10-JH16A4-May2-Spot 247	65.735	41039.3	4.25871	15.967	1.39267	0.877469	2.4763	0.101658	2.04756	0.826864	624.119	12.1801	639.615	11.752	695.665	29.6676	624.119	12.1801	89.7154
He10-JH16A4-May2-Spot 6	98.5455	260417	1.32308	15.9917	1.02463	0.877141	2.86701	0.101777	2.67767	0.933957	624.817	15.9453	639.438	13.6037	692.349	21.8492	624.817	15.9453	90.246
He10-JH16A4-May2-Spot 282	330.95	3.80923e+06	3.4021	15.8932	1.02061	0.88396	2.65085	0.101937	2.4465	0.922912	625.751	14.5895	643.119	12.6299	705.515	21.6943	625.751	14.5895	88.6942
He10-JH16A4-May2-Spot 91	250.811	29556.4	2.97657	16.2167	1.10459	0.869735	2.63428	0.102338	2.39151	0.907841	628.097	14.3124	635.423	12.4429	662.479	23.6682	628.097	14.3124	94.8101
He10-JH16A4-May2-Spot 231	156.029	44020.6	1.75452	16.5344	1.14661	0.856258	2.94398	0.102726	2.71151	0.921036	630.364	16.2833	628.078	13.7898	620.773	24.7419	630.364	16.2833	101.545
He10-JH16A4-May2-Spot 299	375.308	118824	3.49075	16.1927	1.0763	0.877867	3.24352	0.103142	3.05974	0.943339	632.795	18.442	639.83	15.3973	665.697	23.0354	632.795	18.442	95.0575
He10-JH16A4-May2-Spot 266	270.565	39736.2	3.01839	16.4937	1.08764	0.870827	2.74167	0.104217	2.5167	0.917945	639.074	15.3121	636.016	12.9588	626.083	23.4541	639.074	15.3121	102.075
He10-JH16A4-May2-Spot 314	425.306	232128	2.8062	16.1638	0.963315	0.921848	3.0659	0.108116	2.91063	0.949356	661.798	18.3068	663.337	14.9334	669.509	20.6291	661.798	18.3068	98.8483
He10-JH16A4-May2-Spot 166	214.506	55737.6	4.78229	16.286	1.22421	0.926469	2.67249	0.109479	2.37561	0.888911	669.724	15.1115	665.775	13.0508	653.344	26.2716	669.724	15.1115	102.507
He10-JH16A4-May2-Spot 173	140.819	417195	2.77486	15.9667	1.31801	0.951274	2.80773	0.110207	2.47915	0.882973	673.948	15.8645	678.766	13.8995	695.697	28.0875	673.948	15.8645	96.8739
He10-JH16A4-May2-Spot 67	124.099	151091	3.20287	15.9934	1.44288	0.950162	3.28749	0.110262	2.95393	0.898535	674.269	18.9112	678.187	16.2652	692.124	30.7479	674.269	18.9112	97.4203
He10-JH16A4-May2-Spot 59	255.747	74686.1	9.95869	15.9231	1.27946	0.958185	2.82503	0.110704	2.51869	0.891561	676.837	16.183	682.356	14.0371	701.552	27.2607	676.837	16.183	96.4771
He10-JH16A4-May2-Spot 181	464.443	1.07293e+06	2.5086	15.6728	1.221	0.994824	3.00109	0.11313	2.74148	0.913494	690.902	17.9613	701.179	15.1979	735.193	25.8533	690.902	17.9613	93.9757
He10-JH16A4-May2-Spot 275	121.417	79054.8	7.03743	15.3424	1.36508	1.02622	3.5972	0.114241	3.32812	0.925198	697.329	21.9969	717.034	18.501	780.096	28.6946	697.329	21.9969	89.3902
He10-JH16A4-May2-Spot 272	217.093	30876.6	1.5536	15.6322	0.923597	1.04209	2.77613	0.118199	2.61799	0.943036	720.191	17.8395	724.959	14.3857	740.634	19.539	720.191	17.8395	97.2399
He10-JH16A4-May2-Spot 225	251.65	26186	2.56126	15.505	1.20671	1.08254	3.3046	0.121788	3.0764	0.930944	740.844	21.5305	744.871	17.4438	757.889	25.4371	740.844	21.5305	97.7509
He10-JH16A4-May2-Spot 109	214.054	63001.9	1.71131	14.6594	1.12331	1.14657	3.00566	0.121956	2.78786	0.927537	741.815	19.5353	775.623	16.3028	875.124	23.2453	741.815	19.5353	84.7668
He10-JH16A4-May2-Spot 220	239.762	31657.3	0.965194	15.3469	1.46264	1.11629	3.19162	0.124304	2.83675	0.88881	755.29	20.2182	761.197	17.0956	779.479	30.7485	755.29	20.2182	96.8968
He10-JH16A4-May2-Spot 187	57.5704	40126.7	2.59966	15.2544	0.93398	1.13928	2.6747	0.126099	2.50633	0.937051	765.573	18.0922	772.166	14.4643	792.178	19.6145	765.573	18.0922	96.6415
He10-JH16A4-May2-Spot 161	457.312	1.57984e+06	1.66343	15.3908	1.17446	1.13001	3.00245	0.126191	2.76321	0.920319	766.102	19.9596	767.758	16.1749	773.475	24.7138	766.102	19.9596	99.0467
He10-JH16A4-May2-Spot 48	93.6837	47201.6	1.12865	15.2052	1.38617	1.14606	3.33682	0.126441	3.03528	0.909631	767.529	21.9633	775.379	18.0956	798.942	29.064	767.529	21.9633	96.0682
He10-JH16A4-May2-Spot 198	57.4271	11644.4	0.89901	15.1279	1.52517	1.15855	3.31378	0.127168	2.94194	0.887789	771.692	21.3966	781.271	18.0614	809.619	31.9296	771.692	21.3966	95.3154
He10-JH16A4-May2-Spot 33	475.389	33565	1.33602	14.8782	1.96208	1.18322	3.48665	0.127733	2.88218	0.826633	774.919	21.0444	792.811	19.1892	844.385	40.829	774.919	21.0444	91.7731
He10-JH16A4-May2-Spot 4	193.375	504417	1.51071	15.2895	0.853823	1.16778	2.80819	0.129552	2.67524	0.952657	785.309	19.7797	785.608	15.3616	787.35	17.9265	785.309	19.7797	99.7407
He10-JH16A4-May2-Spot 242	196.899	38929.4	1.36439	15.1611	1.11495	1.20292	2.70283	0.132329	2.46215	0.910952	801.14	18.5488	801.935	14.9871	805.034	23.344	801.14	18.5488	99.5163
He10-JH16A4-May2-Spot 308	299.445	52697.6	1.17384	15.0331	1.0281	1.21494	2.58008	0.132523	2.36639	0.917179	802.244	17.8505	807.459	14.3709	822.797	21.4835	802.244	17.8505	97.502
He10-JH16A4-May2-Spot 311	29.9685	62318.7	1.81342	14.3378	1.67309	1.29584	3.22132	0.13481	2.75275	0.854543	815.246	21.0807	843.882	18.4638	920.892	34.3866	815.246	21.0807	88.5278
He10-JH16A4-May2-Spot 280	181.956	51533	1.21538	14.9375	1.03551	1.24905	2.43441	0.135377	2.2032	0.905023	818.465	16.9346	822.975	13.7287	836.085	21.5533	818.465	16.9346	97.8925
He10-JH16A4-May2-Spot 270	334.897	78458.4	2.18446	15.0449	0.964285	1.24194	2.63206	0.135574	2.44907	0.930473	819.587	18.8487	819.762	14.8059	821.165	20.157	819.587	18.8487	99.8078
He10-JH16A4-May2-Spot 156	293.686	67528.5	9.27654	15.2822	1.18161	1.22755	2.47804	0.136117	2.17818	0.878994	822.668	16.823	813.222	13.8668	788.351	24.8245	822.668	16.823	104.353
He10-JH16A4-May2-Spot 58	235.017	24381.3	1.43314	14.857	1.24209	1.26559	2.89126	0.13643	2.61086	0.903019	824.446	20.2056	830.417	16.4009	847.315	25.8113	824.446	20.2056	97.301
He10-JH16A4-May2-Spot 227	194.539	26110	2.03303	15.0345	0.92217	1.26037	2.71553	0.137491	2.55416	0.940573	830.462	19.9019	828.074	15.3757	822.598	19.2727	830.462	19.9019	100.956
He10-JH16A4-May2-Spot 207	257.158	53976.7	2.26888	14.8374	1.38274	1.28898	3.29556	0.138769	2.99144	0.90772	837.697	23.4994	840.845	18.8457	850.092	28.7332	837.697	23.4994	98.542
He10-JH16A4-May2-Spot 174	41.8911	19197.7	2.43045	14.491	1.31568	1.35088	2.78041	0.142037	2.44942	0.880957	856.173	19.6383	867.94	16.2241	898.972	27.1314	856.173	19.6383	95.2392
He10-JH16A4-May2-Spot 278	208.673	176708	2.25914	14.3738	1.44903	1.37097	3.13867	0.142984	2.78417	0.887052	861.513	22.4524	876.58	18.43	915.745	29.8006	861.513	22.4524	94.0779
He10-JH16A4-May2-Spot 66	59.5456	101866	1.80252	14.64	1.11034	1.36997	3.59031	0.145527	3.4143	0.950977	875.838	27.9614	876.152	21.0762	877.867	22.9737	875.838	27.9614	99.769
He10-JH16A4-May2-Spot 215	29.7916	9395.84	2.60677	14.6372	1.70386	1.37069	3.09244	0.145574	2.58071	0.834522	876.103	21.1407	876.458	18.1569	878.259	35.2543	876.103	21.1407	99.7545
He10-JH16A4-May2-Spot 46	360.849	79034.6	3.34365	14.4726	1.43266	1.3984	2.90745	0.146847	2.52998	0.870169	883.264	20.8831	888.26	17.2145	901.597	29.5253	883.264	20.8831	97.9666
He10-JH16A4-May2-Spot 295	267.139	52145.1	5.32742	14.4017	1.12074	1.41035	2.5148	0.147376	2.25125	0.895203	886.239	18.6408	893.305	14.9421	911.71	23.087	886.239	18.6408	97.2062
He10-JH16A4-May2-Spot 258	53.436	6191.95	2.32474	14.7476	1.43765	1.39054	3.01806	0.148796	2.65365	0.879256	894.213	22.1571	884.927	17.8275	862.704	29.814	894.213	22.1571	103.652
He10-JH16A4-May2-Spot 89	347.589	84261.8	1.00372	14.4885	1.08064	1.44262	2.55649	0.151657	2.31687	0.906268	910.246	19.668	906.811	15.3322	899.331	22.29	899.331	22.29	101.214
He10-JH16A4-May2-Spot 8	120.963	36854.6	1.64464	14.6478	1.02663	1.41157	2.65646	0.150025	2.45006	0.922303	901.102	20.604	893.819	15.7896	876.743	21.2486	901.102	20.604	102.778
He10-JH16A4-May2-Spot 186	161.39	464662	1.90497	14.4516	1.04782	1.46004	2.83056	0.153097	2.62947	0.92896	918.3	22.5055	914.024	17.0595	904.591	21.5951	904.591	21.5951	101.515
He10-JH16A4-May2-Spot 236	832.353	150892	11.3506	14.5746	1.21716	1.43155	3.67685	0.151388	3.46954	0.943619	908.738	29.4078	902.197	21.9835	887.094	25.1555	908.738	29.4078	102.44
He10-JH16A4-May2-Spot 284	105.388	86871.4	0.596784	14.3518	1.33488	1.51041	2.93936	0.157286	2.61877	0.890931	941.675	22.9438	934.606	17.9588	918.89	27.4437	918.89	27.4437	102.48
He10-JH16A4-May2-Spot 10	143.516	44253.6	1.4256	14.3444	1.39561	1.42926	2.80212	0.148759	2.42985	0.867146	894.001	20.2839	901.242	16.7415	919.951	28.6946	919.951	28.6946	97.1791
He10-JH16A4-May2-Spot 254	501.467	236309	4.66681	14.1303	0.829997	1.54718	3.1418	0.158628	3.03018	0.964474	949.15	26.744	949.371	19.3795	950.792	16.9871	950.792	16.9871	99.8273
He10-JH16A4-May2-Spot 13	221.759	40335.7	1.32001	14.0766	1.13431	1.58022	2.91854	0.1614	2.68909	0.921383	964.553	24.0906	962.455	18.1511	958.535	23.1888	958.535	23.1888	100.628
He10-JH16A4-May2-Spot 90	180.088	30531.2	3.03967	14.0556	1.41261	1.47478	3.02686	0.150405	2.67702	0.884421	903.235	22.5623	920.091	18.3173	961.638	28.8773	961.638	28.8773	93.9267
He10-JH16A4-May2-Spot 104	157.125	35405.6	1.18549	14.0201	1.33267	1.57586	2.8711	0.160309	2.54307	0.885748	958.493	22.6497	960.74	17.8369	966.767	27.2225	966.767	27.2225	99.1441
He10-JH16A4-May2-Spot 64	226.622	7.93069e+06	2.82747	13.9913	1.16351	1.57371	2.07492	0.159761	1.71801	0.827986	955.447	15.2562	959.89	12.8831	970.969	23.741	970.969	23.741	98.4014
He10-JH16A4-May2-Spot 65	290.382	228054	1.19814	13.9761	1.35672	1.66442	3.30735	0.168786	3.01627	0.91199	1005.42	28.0796	995.062	20.9813	973.212	27.6572	973.212	27.6572	103.309
He10-JH16A4-May2-Spot 259	229.484	105439	1.28122	13.9724	1.20764	1.59863	2.65507	0.162071	2.36453	0.890572	968.276	21.2587	969.675	16.5862	973.73	24.6239	973.73	24.6239	99.4399
He10-JH16A4-May2-Spot 180	338.676	172598	2.69803	13.9384	1.218	1.68342	2.7079	0.170253	2.41851	0.893132	1013.5	22.6821	1002.28	17.2508	978.67	24.8047	978.67	24.8047	103.559
He10-JH16A4-May2-Spot 309	398.93	70564.3	1.97746	13.9371	0.956605	1.59248	3.37413	0.161041	3.23568	0.958969	962.558	28.9318	967.27	21.0481	978.862	19.4903	978.862	19.4903	98.3344
He10-JH16A4-May2-Spot 155	366.561	118009	2.83116	13.9096	0.968341	1.59076	3.23259	0.160549	3.08415	0.954079	959.827	27.5043	966.594	20.1565	982.92	19.6986	982.92	19.6986	97.6505
He10-JH16A4-May2-Spot 287	194.207	1.08727e+07	1.47202	13.8755	1.13391	1.70571	2.3145	0.171729	2.0177	0.871768	1021.63	19.0631	1010.68	14.8164	987.878	23.052	987.878	23.052	103.417
He10-JH16A4-May2-Spot 16	112.139	185319	2.02238	13.8068	0.994809	1.62356	3.0521	0.162648	2.88543	0.94539	971.474	26.0214	979.368	19.1804	997.978	20.1992	997.978	20.1992	97.3442
He10-JH16A4-May2-Spot 172	521.83	65450.4	1.2822	13.7716	1.06807	1.67228	3.08532	0.167101	2.89456	0.938169	996.119	26.7161	998.051	19.607	1003.16	21.6622	1003.16	21.6622	99.2982
He10-JH16A4-May2-Spot 125	36.5209	4462.04	5.16733	13.5922	1.37061	1.77115	3.85231	0.174676	3.60024	0.934566	1037.82	34.5118	1034.94	25.0054	1029.72	27.73	1029.72	27.73	100.786
He10-JH16A4-May2-Spot 305	13.7287	3341.07	0.812055	13.5811	1.77189	1.73594	2.69264	0.171064	2.0275	0.752976	1017.97	19.0923	1021.96	17.3492	1031.37	35.8146	1031.37	35.8146	98.7013
He10-JH16A4-May2-Spot 69	65.7334	31177.9	2.91267	13.4443	1.13913	1.78437	3.1166	0.174065	2.90096	0.93081	1034.47	27.7257	1039.77	20.2827	1051.84	22.9719	1051.84	22.9719	98.3484
He10-JH16A4-May2-Spot 206	92.9994	59257.7	3.53649	13.3793	1.4204	1.74358	3.31531	0.169263	2.99562	0.903572	1008.05	27.9549	1024.79	21.3965	1061.6	28.5799	1061.6	28.5799	94.956
He10-JH16A4-May2-Spot 55	325.345	64662.5	2.94505	13.2814	1.24592	1.89594	3.12123	0.182707	2.86178	0.916874	1081.74	28.4993	1079.67	20.7516	1076.37	24.9953	1076.37	24.9953	100.5
He10-JH16A4-May2-Spot 100	138.441	40245.9	1.13771	12.8941	1.14257	2.05623	2.78475	0.192376	2.53956	0.911952	1134.23	26.4129	1134.37	19.0263	1135.48	22.7374	1135.48	22.7374	99.8899
He10-JH16A4-May2-Spot 205	239.991	81852.2	0.918598	12.7948	0.854581	2.02225	2.717	0.18774	2.5791	0.949247	1109.12	26.28	1123.02	18.4617	1150.86	16.9693	1150.86	16.9693	96.3731
He10-JH16A4-May2-Spot 158	130.885	45416.8	0.907942	12.723	1.08407	2.11101	2.84633	0.194879	2.6318	0.924629	1147.75	27.6704	1152.41	19.6136	1162.01	21.5008	1162.01	21.5008	98.7728
He10-JH16A4-May2-Spot 135	420.75	135233	1.61071	12.654	1.00544	2.0146	2.72278	0.184971	2.53035	0.929323	1094.08	25.4622	1120.44	18.4778	1172.82	19.9002	1172.82	19.9002	93.2858
He10-JH16A4-May2-Spot 113	178.122	100738	1.37766	12.5151	1.08058	2.17219	2.80968	0.197252	2.59357	0.923086	1160.54	27.5458	1172.18	19.5379	1194.6	21.3196	1194.6	21.3196	97.1488
He10-JH16A4-May2-Spot 195	597.421	1.13998e+06	1.09527	11.7755	1.01799	2.62838	2.60319	0.224571	2.39589	0.920368	1305.98	28.3243	1308.61	19.1498	1313.75	19.7457	1313.75	19.7457	99.4089
He10-JH16A4-May2-Spot 281	201.684	69507.5	2.65294	10.7353	1.02071	3.17972	2.93306	0.247679	2.74973	0.937494	1426.5	35.1884	1452.25	22.6603	1490.94	19.3232	1490.94	19.3232	95.6778
He10-JH16A4-May2-Spot 211	136.635	233726	2.42114	10.715	1.17602	3.35956	2.8514	0.261193	2.59759	0.910987	1495.94	34.6795	1495.02	22.315	1494.52	22.2528	1494.52	22.2528	100.095
He10-JH16A4-May2-Spot 53	546.851	69359.9	6.54245	10.3493	1.1095	3.33633	2.97076	0.250534	2.7558	0.927641	1441.23	35.5911	1489.6	23.2124	1559.94	20.8115	1559.94	20.8115	92.3905
He10-JH16A4-May2-Spot 56	307.616	189222	0.890852	9.86961	1.11673	3.89255	2.93093	0.278755	2.70985	0.924569	1585.09	38.0805	1612.14	23.6817	1648.44	20.7079	1648.44	20.7079	96.1566
He10-JH16A4-May2-Spot 140	307.479	1.88672e+06	1.22656	9.76459	1.40429	3.81272	2.94092	0.270133	2.58399	0.878632	1541.48	35.4275	1595.43	23.6611	1668.25	25.9753	1668.25	25.9753	92.4007
He10-JH16A4-May2-Spot 201	39.1446	18003.2	0.890515	9.72007	1.26475	3.42947	3.1088	0.241871	2.8399	0.913504	1396.42	35.656	1511.17	24.4445	1676.7	23.3688	1676.7	23.3688	83.2837
He10-JH16A4-May2-Spot 42	1490.03	1.21949e+06	2.45715	9.39077	1.05773	4.47746	3.75436	0.305085	3.60228	0.959492	1716.47	54.2859	1726.8	31.1713	1740.13	19.3876	1740.13	19.3876	98.6408
He10-JH16A4-May2-Spot 245	515.819	289142	2.97643	9.32214	1.13498	4.53163	3.84662	0.306519	3.67537	0.955479	1723.56	55.5868	1736.79	32.0077	1753.56	20.7687	1753.56	20.7687	98.2892
He10-JH16A4-May2-Spot 86	21.6313	92642.7	1.26966	9.25185	1.32644	4.56262	2.75027	0.306289	2.40926	0.876009	1722.42	36.4165	1742.47	22.9094	1767.39	24.2313	1767.39	24.2313	97.4552
He10-JH16A4-May2-Spot 11	181.501	28508.2	8.16267	9.24188	1.3593	4.39641	3.31932	0.294813	3.02823	0.912305	1665.54	44.4482	1711.67	27.4649	1769.37	24.8255	1769.37	24.8255	94.1318
He10-JH16A4-May2-Spot 92	114.073	77070.6	1.3839	9.14864	0.900644	4.80734	1.94219	0.319117	1.72073	0.885978	1785.41	26.835	1786.18	16.3262	1787.86	16.4103	1787.86	16.4103	99.8632
He10-JH16A4-May2-Spot 106	563.787	356023	6.4009	9.13974	1.42546	4.23033	3.09707	0.280541	2.74953	0.887784	1594.09	38.8315	1679.93	25.44	1789.63	25.9689	1789.63	25.9689	89.0733
He10-JH16A4-May2-Spot 43	166.587	130564	3.5274	9.09223	1.02329	4.64936	2.61089	0.306726	2.40201	0.919995	1724.58	36.3466	1758.18	21.8212	1799.12	18.6194	1799.12	18.6194	95.8567
He10-JH16A4-May2-Spot 257	86.5892	46666.9	0.81885	9.01931	0.834141	5.04583	2.62063	0.330213	2.48434	0.947991	1839.41	39.7564	1827.05	22.2117	1813.76	15.1501	1813.76	15.1501	101.414
He10-JH16A4-May2-Spot 141	129.357	231110	1.27814	8.99779	1.02533	5.04265	3.0811	0.329217	2.90549	0.943004	1834.59	46.3908	1826.51	26.1134	1818.1	18.6133	1818.1	18.6133	100.907
He10-JH16A4-May2-Spot 60	188.721	55647.6	1.4581	8.97267	1.06953	4.88042	2.93467	0.317736	2.73284	0.931225	1778.66	42.4792	1798.88	24.7357	1823.17	19.4037	1823.17	19.4037	97.5588
He10-JH16A4-May2-Spot 188	74.8453	51613.4	1.25714	8.95565	0.935666	5.18989	2.65941	0.337243	2.48938	0.936063	1873.39	40.4713	1850.96	22.6445	1826.62	16.9677	1826.62	16.9677	102.561
He10-JH16A4-May2-Spot 221	256.291	95064.4	4.46057	8.93611	1.05165	4.90713	2.52048	0.318174	2.2906	0.908796	1780.8	35.6422	1803.48	21.2632	1830.57	19.062	1830.57	19.062	97.2812
He10-JH16A4-May2-Spot 62	179.173	81716.9	1.76351	8.93609	1.15122	4.98295	2.75151	0.323089	2.4991	0.908265	1804.8	39.3406	1816.43	23.2728	1830.58	20.8671	1830.58	20.8671	98.5917
He10-JH16A4-May2-Spot 131	216.116	167503	2.68527	8.92416	1.18883	5.21207	2.70058	0.337493	2.42483	0.897894	1874.6	39.4438	1854.59	23.011	1833	21.5407	1833	21.5407	102.269
He10-JH16A4-May2-Spot 218	170.451	31713.8	1.82919	8.92265	1.57338	4.57984	3.43021	0.296505	3.04809	0.8886	1673.96	44.9377	1745.61	28.5953	1833.31	28.5094	1833.31	28.5094	91.308
He10-JH16A4-May2-Spot 265	339.662	269590	1.47391	8.92207	1.36375	5.00234	3.08021	0.323837	2.76186	0.896648	1808.44	43.553	1819.72	26.071	1833.43	24.7097	1833.43	24.7097	98.6373
He10-JH16A4-May2-Spot 182	63.8033	74599.7	1.01331	8.91239	0.960064	4.90079	2.64114	0.316919	2.46047	0.931593	1774.66	38.1707	1802.39	22.2765	1835.39	17.3934	1835.39	17.3934	96.6913
He10-JH16A4-May2-Spot 238	421.919	251880	11.8856	8.89676	0.853042	5.27002	2.4608	0.340198	2.30821	0.937994	1887.62	37.7713	1864.02	21.0045	1838.57	15.4465	1838.57	15.4465	102.668
He10-JH16A4-May2-Spot 152	194.495	30149.9	2.81136	8.89441	1.15022	4.46551	1.95148	0.288188	1.57648	0.807836	1632.47	22.7355	1724.58	16.1909	1839.05	20.8275	1839.05	20.8275	88.767
He10-JH16A4-May2-Spot 167	805.886	703525	2.59508	8.88314	1.49326	4.57672	3.22794	0.294991	2.86177	0.886564	1666.42	42.0244	1745.04	26.9049	1841.34	27.031	1841.34	27.031	90.5003
He10-JH16A4-May2-Spot 194	425.974	305665	2.3849	8.87635	1.15948	5.06326	3.21781	0.326101	3.00165	0.932824	1819.46	47.5841	1829.97	27.291	1842.73	20.9859	1842.73	20.9859	98.7371
He10-JH16A4-May2-Spot 262	156.048	296658	3.07583	8.87368	1.17357	4.70188	3.30107	0.302735	3.08542	0.934672	1704.86	46.2218	1767.57	27.6468	1843.27	21.2395	1843.27	21.2395	92.4908
He10-JH16A4-May2-Spot 301	14.804	4652.61	0.898898	8.87028	1.45676	5.10117	3.66974	0.328318	3.36821	0.917834	1830.22	53.6686	1836.3	31.1644	1843.97	26.3635	1843.97	26.3635	99.2547
He10-JH16A4-May2-Spot 137	156.333	1.14688e+06	1.06843	8.86145	0.952693	5.04338	2.94836	0.324275	2.7902	0.946356	1810.57	44.0449	1826.64	24.9885	1845.77	17.2363	1845.77	17.2363	98.0932
He10-JH16A4-May2-Spot 269	39.7681	14335.1	6.83688	8.83271	1.2065	5.32029	2.25251	0.340971	1.90215	0.844456	1891.34	31.1791	1872.13	19.2552	1851.65	21.8135	1851.65	21.8135	102.144
He10-JH16A4-May2-Spot 202	436.772	212748	2.81112	8.82215	0.995731	5.26344	2.54562	0.336924	2.34279	0.920325	1871.86	38.0612	1862.95	21.7243	1853.81	17.9975	1853.81	17.9975	100.974
He10-JH16A4-May2-Spot 134	238.874	144649	3.08694	8.81762	0.82976	5.26868	2.68425	0.337086	2.55278	0.951022	1872.64	41.4877	1863.8	22.9114	1854.73	14.9955	1854.73	14.9955	100.965
He10-JH16A4-May2-Spot 170	66.9761	80255.8	1.90038	8.79864	1.01916	5.24845	2.88123	0.335069	2.69496	0.93535	1862.9	43.6021	1860.52	24.5783	1858.63	18.4103	1858.63	18.4103	100.23
He10-JH16A4-May2-Spot 124	124.596	92563.2	1.92727	8.78782	1.32897	5.16689	3.40969	0.329456	3.14003	0.920915	1835.75	50.1632	1847.18	29.0152	1860.85	24.0013	1860.85	24.0013	98.651
He10-JH16A4-May2-Spot 175	187.425	88764.9	2.24199	8.75042	0.957204	5.21433	2.39798	0.331067	2.19866	0.916877	1843.55	35.2529	1854.96	20.4333	1868.55	17.2703	1868.55	17.2703	98.6621
He10-JH16A4-May2-Spot 291	45.7909	65727.2	0.940907	8.73208	0.925156	5.45005	2.71552	0.345307	2.55306	0.940175	1912.15	42.2445	1892.76	23.3022	1872.33	16.6863	1872.33	16.6863	102.127
He10-JH16A4-May2-Spot 12	175.849	121724	2.3789	8.73196	1.05101	5.16284	2.53377	0.327106	2.3055	0.909912	1824.34	36.6329	1846.51	21.5561	1872.36	18.9525	1872.36	18.9525	97.4354
He10-JH16A4-May2-Spot 74	366.757	328567	2.71672	8.73045	1.0827	5.08473	3.0489	0.322101	2.85018	0.934823	1799.98	44.7636	1833.56	25.8758	1872.67	19.5234	1872.67	19.5234	96.1185
He10-JH16A4-May2-Spot 296	263.793	71844.2	2.14253	8.71561	1.09929	5.1677	2.45763	0.326801	2.19807	0.894386	1822.86	34.9012	1847.31	20.9113	1875.74	19.817	1875.74	19.817	97.1807
He10-JH16A4-May2-Spot 98	407.208	274835	10.7445	8.71252	1.21567	5.26336	2.7808	0.332732	2.501	0.899382	1851.61	40.2521	1862.94	23.732	1876.38	21.9137	1876.38	21.9137	98.68
He10-JH16A4-May2-Spot 15	77.7414	90120.2	1.14076	8.66971	0.79002	5.33083	2.63498	0.335342	2.51376	0.953996	1864.22	40.6952	1873.82	22.5327	1885.25	14.2248	1885.25	14.2248	98.8845
He10-JH16A4-May2-Spot 54	533.91	504533	8.76758	8.6488	1.35957	5.18338	3.75629	0.325279	3.50161	0.9322	1815.46	55.4047	1849.89	31.983	1889.6	24.4693	1889.6	24.4693	96.0765
He10-JH16A4-May2-Spot 234	345.324	77729.3	6.81013	8.64757	1.17088	5.35617	2.79317	0.336075	2.53591	0.907896	1867.76	41.1209	1877.88	23.9037	1889.85	21.0723	1889.85	21.0723	98.8309
He10-JH16A4-May2-Spot 263	334.335	1.86803e+06	2.34004	8.64266	1.03214	5.06456	2.51503	0.317598	2.29348	0.911911	1777.99	35.6379	1830.19	21.3294	1890.87	18.5726	1890.87	18.5726	94.0299
He10-JH16A4-May2-Spot 212	730.964	87280.3	4.37028	8.64069	1.18478	5.30846	3.11686	0.332817	2.8829	0.924937	1852.02	46.4076	1870.23	26.6374	1891.28	21.3188	1891.28	21.3188	97.924
He10-JH16A4-May2-Spot 149	322.611	68590.2	2.71475	8.6334	1.10092	4.92377	3.28879	0.308438	3.09905	0.942307	1733.01	47.0943	1806.34	27.7634	1892.8	19.8059	1892.8	19.8059	91.5581
He10-JH16A4-May2-Spot 250	278.12	267627	2.61693	8.59147	1.11983	5.19046	2.96204	0.323565	2.7422	0.925781	1807.12	43.2155	1851.05	25.2228	1901.56	20.1251	1901.56	20.1251	95.0336
He10-JH16A4-May2-Spot 87	228.51	73515.3	2.48205	8.58995	1.1817	5.06271	2.7809	0.315545	2.51734	0.905224	1767.94	38.9243	1829.88	23.5836	1901.87	21.2364	1901.87	21.2364	92.9576
He10-JH16A4-May2-Spot 241	630.858	82695.2	3.54476	8.57955	1.11529	4.92756	2.6952	0.30675	2.45361	0.910366	1724.69	37.1297	1806.99	22.7535	1904.05	20.0375	1904.05	20.0375	90.5801
He10-JH16A4-May2-Spot 88	139.549	170209	2.7398	8.55498	0.972408	5.49726	2.76827	0.341234	2.59186	0.936275	1892.6	42.5093	1900.17	23.7867	1909.2	17.4614	1909.2	17.4614	99.1307
He10-JH16A4-May2-Spot 78	210.151	66010.6	1.23605	8.35522	1.43454	5.94853	3.26221	0.360624	2.92986	0.898123	1985.13	50.06	1968.35	28.3642	1951.52	25.6279	1951.52	25.6279	101.723
He10-JH16A4-May2-Spot 114	72.4411	89770.9	1.51928	8.1837	1.16042	5.75924	2.74412	0.341982	2.48668	0.906187	1896.2	40.8508	1940.31	23.7454	1988.49	20.6422	1988.49	20.6422	95.3584
He10-JH16A4-May2-Spot 213	27.5067	103603	1.34685	8.04744	1.18318	6.31174	2.88021	0.368548	2.62596	0.911727	2022.57	45.5878	2020.09	25.2506	2018.31	20.9724	2018.31	20.9724	100.211
He10-JH16A4-May2-Spot 105	92.6463	45992.2	1.37705	8.01028	1.02011	6.11268	2.88173	0.355277	2.69513	0.935248	1959.75	45.5454	1992.06	25.1519	2026.51	18.0663	2026.51	18.0663	96.7055
He10-JH16A4-May2-Spot 130	183.153	903046	4.1071	7.45454	1.33959	6.79812	3.38706	0.367704	3.1109	0.918465	2018.59	53.9163	2085.48	29.9901	2152.93	23.3891	2152.93	23.3891	93.76
He10-JH16A4-May2-Spot 95	356.365	182061	2.47368	7.37474	0.943249	6.89073	3.10967	0.368722	2.96316	0.952886	2023.39	51.4596	2097.46	27.5803	2171.7	16.4337	2171.7	16.4337	93.1705
He10-JH16A4-May2-Spot 40	190.167	189724	1.38409	7.20876	1.11367	7.41711	2.84644	0.387956	2.61954	0.920285	2113.34	47.2017	2163.04	25.4739	2211.28	19.3195	2211.28	19.3195	95.5712
He10-JH16A4-May2-Spot 32	776.057	577882	4.17179	7.17566	1.07192	7.5588	2.50829	0.393553	2.26771	0.904085	2139.28	41.2849	2179.99	22.4967	2219.26	18.5791	2219.26	18.5791	96.3964
He10-JH16A4-May2-Spot 5	156.694	62356.7	1.14894	7.0933	0.857231	6.58883	3.1388	0.339113	3.01947	0.961983	1882.4	49.2929	2057.85	27.678	2239.24	14.8252	2239.24	14.8252	84.0641
He10-JH16A4-May2-Spot 260	324.634	97859.5	6.20689	7.00547	0.796006	6.81914	2.61232	0.346621	2.48809	0.952444	1918.44	41.2856	2088.21	23.1367	2260.77	13.7342	2260.77	13.7342	84.8581
He10-JH16A4-May2-Spot 61	372.916	243225	5.7089	6.87369	1.77935	7.59568	3.02949	0.37883	2.45188	0.809339	2070.82	43.4268	2184.35	27.1887	2293.48	30.5965	2293.48	30.5965	90.2916
He10-JH16A4-May2-Spot 222	109.931	71728.1	1.27539	6.87129	0.999759	7.17448	2.66946	0.357698	2.47517	0.92722	1971.25	42.0381	2133.34	23.7937	2294.08	17.1893	2294.08	17.1893	85.928
He10-JH16A4-May2-Spot 153	124.803	61419.8	1.06571	6.77246	0.938802	8.535	2.37519	0.419409	2.18178	0.918572	2257.8	41.559	2289.66	21.5912	2318.95	16.0987	2318.95	16.0987	97.3628
He10-JH16A4-May2-Spot 93	236.222	126387	3.16205	6.64244	1.10462	8.13817	2.76482	0.392231	2.53457	0.916722	2133.17	46.0321	2246.49	25.0065	2352.13	18.8769	2352.13	18.8769	90.6907
He10-JH16A4-May2-Spot 183	142.63	74297.9	6.99311	6.61569	1.01776	9.0474	2.60832	0.434297	2.40156	0.920731	2325.06	46.8777	2342.81	23.8528	2359.03	17.3798	2359.03	17.3798	98.5599
He10-JH16A4-May2-Spot 129	522.677	295433	11.1836	6.43581	1.3188	8.44392	3.30119	0.394308	3.02632	0.916737	2142.78	55.1723	2279.91	29.9791	2405.99	22.4126	2405.99	22.4126	89.0601
He10-JH16A4-May2-Spot 102	190.278	9.07019e+06	4.87408	6.34876	1.31441	8.89186	2.70493	0.409609	2.3641	0.873997	2213.13	44.2856	2326.97	24.6937	2429.1	22.2853	2429.1	22.2853	91.1092
He10-JH16A4-May2-Spot 151	103.067	48575.5	1.30538	6.27327	1.36606	9.53254	2.64423	0.433901	2.26403	0.856216	2323.28	44.165	2390.69	24.3045	2449.36	23.1135	2449.36	23.1135	94.8524
He10-JH16A4-May2-Spot 18	193.806	77360.7	3.85261	6.26833	1.03716	9.72673	2.77267	0.442391	2.57138	0.927402	2361.33	50.8413	2409.24	25.534	2450.7	17.5451	2450.7	17.5451	96.3536
He10-JH16A4-May2-Spot 3	457.362	223819	2.93201	6.23051	1.06996	9.45951	2.72043	0.427642	2.50118	0.919407	2295.08	48.2983	2383.62	24.9869	2460.93	18.0815	2460.93	18.0815	93.2607
He10-JH16A4-May2-Spot 123	212.554	129153	3.6481	6.20799	1.40501	9.94868	4.58842	0.44813	4.36802	0.951965	2386.93	87.1416	2430.03	42.3593	2467.04	23.7303	2467.04	23.7303	96.753
He10-JH16A4-May2-Spot 2	242.213	335490	1.63681	6.20032	1.00511	8.83434	2.8783	0.397444	2.6971	0.937047	2157.26	49.4499	2321.04	26.2598	2469.13	16.9713	2469.13	16.9713	87.3693
He10-JH16A4-May2-Spot 200	58.5242	61488.1	2.65409	6.19496	0.965196	10.1403	2.65289	0.455804	2.47107	0.931466	2421	49.8755	2447.65	24.5238	2470.59	16.2948	2470.59	16.2948	97.993
He10-JH16A4-May2-Spot 97	270.197	95172.9	1.25634	6.18495	1.00524	9.60448	3.20827	0.43102	3.04672	0.949646	2310.32	59.1582	2397.6	29.5126	2473.32	16.9663	2473.32	16.9663	93.4095
He10-JH16A4-May2-Spot 169	164.095	362823	1.15758	6.17706	0.855504	9.77188	2.6063	0.437973	2.46189	0.944593	2341.56	48.3384	2413.5	24.0116	2475.47	14.4355	2475.47	14.4355	94.5904
He10-JH16A4-May2-Spot 240	818.339	1.20625e+06	2.42057	6.14703	1.52235	9.68473	3.53918	0.431957	3.19503	0.902761	2314.54	62.1323	2405.26	32.5841	2483.69	25.6668	2483.69	25.6668	93.1892
He10-JH16A4-May2-Spot 103	607.618	126471	2.3385	6.10301	1.09761	9.58212	3.46067	0.42432	3.282	0.94837	2280.06	63.0313	2395.46	31.8289	2495.81	18.4839	2495.81	18.4839	91.3556
He10-JH16A4-May2-Spot 28	143.483	111502	2.11855	6.08888	1.26227	11.1184	2.58083	0.49121	2.25108	0.872231	2575.91	47.8018	2533.1	24.0473	2499.71	21.2492	2499.71	21.2492	103.048
He10-JH16A4-May2-Spot 313	338.599	64715.5	1.7343	6.06084	1.23374	9.84123	2.99078	0.432783	2.72445	0.910951	2318.25	53.0513	2420.02	27.5735	2507.48	20.7528	2507.48	20.7528	92.4534
He10-JH16A4-May2-Spot 27	427.606	72312.5	1.78164	5.92975	1.08506	10.0237	3.05096	0.431273	2.85149	0.934621	2311.45	55.3898	2436.97	28.1759	2544.19	18.1851	2544.19	18.1851	90.8522
He10-JH16A4-May2-Spot 142	79.0688	70478.8	1.3698	5.92491	1.59589	10.6721	3.53783	0.458797	3.15743	0.892477	2434.24	64.0165	2495	32.8564	2545.56	26.7453	2545.56	26.7453	95.6271
He10-JH16A4-May2-Spot 177	91.401	470071	3.30441	5.91058	1.46412	10.5822	2.64616	0.45383	2.2042	0.832981	2412.26	44.3564	2487.15	24.5536	2549.62	24.5268	2549.62	24.5268	94.6126
He10-JH16A4-May2-Spot 82	166.468	180669	1.61518	5.81328	0.936117	11.583	2.11076	0.488572	1.89182	0.896275	2564.49	40.0279	2571.3	19.7315	2577.38	15.6405	2577.38	15.6405	99.5
He10-JH16A4-May2-Spot 277	240.944	223776	1.53035	5.755	1.03355	11.8898	2.55571	0.496488	2.3374	0.914578	2598.68	49.9914	2595.76	23.9415	2594.2	17.2374	2594.2	17.2374	100.173
He10-JH16A4-May2-Spot 127	462.336	335654	3.10321	5.71662	1.12197	10.5433	3.49467	0.437323	3.30967	0.947062	2338.64	64.918	2483.73	32.4213	2605.35	18.6922	2605.35	18.6922	89.7631
He10-JH16A4-May2-Spot 37	384.826	167797	1.97541	5.69119	0.982233	11.5032	2.63893	0.475016	2.44932	0.928149	2505.52	50.8493	2564.84	24.657	2612.78	16.3521	2612.78	16.3521	95.8949
He10-JH16A4-May2-Spot 44	29.3285	18545.2	2.19288	5.36625	1.21142	12.9587	2.66406	0.50457	2.37269	0.890631	2633.41	51.2953	2676.66	25.1176	2710.2	19.9863	2710.2	19.9863	97.1665
He10-JH16A4-May2-Spot 147	358.75	296536	1.97632	5.06982	1.09006	13.2119	2.81682	0.486009	2.59736	0.922088	2553.39	54.7626	2694.91	26.5951	2803.53	17.8305	2803.53	17.8305	91.0777
He10-JH16A4-May2-Spot 81	402.062	138730	2.73407	4.68354	1.1195	15.7714	2.99231	0.535958	2.77501	0.927378	2766.51	62.4234	2863.05	28.5793	2932.4	18.1	2932.4	18.1	94.3428
He10-JH16A4-May2-Spot 99	231.431	291937	2.67505	4.40003	1.26816	18.591	3.14146	0.593535	2.87412	0.914898	3003.74	69.0119	3020.84	30.2787	3032.92	20.3285	3032.92	20.3285	99.0377
He10-JH16A4-May2-Spot 9	197.357	141970	2.2058	3.70561	1.08904	25.1514	2.90895	0.676253	2.6974	0.927277	3329.97	70.1538	3314.11	28.415	3305.21	17.0825	3305.21	17.0825	100.749
He10-JH16A4-May2-Spot 293	278.044	118302	2.54802	3.69287	1.01134	22.4615	2.64362	0.601854	2.44252	0.923931	3037.3	59.1612	3203.9	25.7042	3310.61	15.8568	3310.61	15.8568	91.7445
He10-JH16A4-May2-Spot 23	162.697	592085	2.42786	3.45508	1.13857	24.597	2.72409	0.616636	2.47474	0.908464	3096.52	60.8524	3292.36	26.5855	3414.53	17.7078	3414.53	17.7078	90.6864
Notes: see Table S5a

## Sheet: O2-3
Table S5e. U-Pb geochronologic analyses.				JHPM16- O2-3
							Isotope ratios						Apparent ages (Ma)
Analysis	U	206Pb	U/Th	206Pb*	±	207Pb*	±	206Pb*	±	error	206Pb*	±	207Pb*	±	206Pb*	±	Best age	±	Conc
	(ppm)	204Pb		207Pb*	(%)	235U*	(%)	238U	(%)	corr.	238U*	(Ma)	235U	(Ma)	207Pb*	(Ma)	(Ma)	(Ma)	(%)
He5-JHO23-Sample 1 Spot 38	536.735	39887.2	2.89959	20.3343	1.57746	0.118103	3.20731	0.0174252	2.79257	0.87069	111.362	3.08316	113.351	3.43994	156.334	36.9312	111.362	3.08316	NA
He5-JHO23-Sample 1 Spot 66	222.602	12737	2.34312	20.4733	1.78821	0.16269	3.06645	0.0241678	2.49107	0.812362	153.943	3.78939	153.055	4.35678	140.339	41.9754	153.943	3.78939	NA
He5-JHO23-Sample 1 Spot 57 Rim	143.315	2925.91	1.99845	22.2777	5.91446	0.171552	6.71432	0.0277303	3.17826	0.473355	176.327	5.52818	160.765	9.98346	NA	NA	176.327	5.52818	NA
He5-JHO23-Sample 1 Spot 56	321.093	36004.6	1.02122	20.2352	1.82467	0.192042	3.83593	0.0281963	3.37415	0.879619	179.25	5.96485	178.37	6.27496	167.725	42.6417	179.25	5.96485	NA
He5-JHO23-Sample 1 Spot 19	229.224	28441.6	2.75653	19.742	1.27503	0.198503	3.2437	0.0284345	2.9826	0.919505	180.743	5.31597	183.859	5.45511	225.102	29.461	180.743	5.31597	NA
He5-JHO23-Sample 1 Spot 33	152.209	2186.62	3.90038	20.8438	7.17378	0.310838	7.5852	0.047011	2.46417	0.324865	296.145	7.13242	274.831	18.2654	98.101	169.92	296.145	7.13242	NA
He5-JHO23-Sample 1 Spot 29	92.5358	4732.77	1.2522	20.3111	2.41104	0.3218	3.69099	0.047425	2.7947	0.757167	298.693	8.15714	283.286	9.12441	159.015	56.4159	298.693	8.15714	NA
He5-JHO23-Spot 113 Rim	1617.96	7260.92	4.3023	16.0354	1.08661	0.548864	3.31642	0.0638603	3.13335	0.944801	399.059	12.1248	444.252	11.9336	686.573	23.2115	399.059	12.1248	NA
He5-JHO23-Sample 1 Spot 47	920.968	42063.1	4.23153	18.1191	1.10949	0.511321	2.86441	0.067223	2.64082	0.921939	419.403	10.7231	419.337	9.84049	419.926	24.7743	419.403	10.7231	99.8756
He5-JHO23-Sample 1 Spot 68 Rim	343.206	24822.7	1.51614	17.2824	1.36187	0.668729	3.62514	0.0838577	3.35961	0.926752	519.108	16.7563	519.939	14.752	524.527	29.8791	519.108	16.7563	98.9669
He5-JHO23-Sample 1 Spot 43	61.7454	20555.2	1.09422	17.1649	1.7458	0.682693	3.40487	0.0850266	2.92324	0.858546	526.056	14.7672	528.401	14.0274	539.471	38.1898	526.056	14.7672	97.5133
He5-JHO23-Sample 1 Spot 35	86.1143	42917.8	1.35324	17.069	1.26227	0.699975	2.9022	0.0866919	2.61332	0.900462	535.943	13.4395	538.776	12.1344	551.755	27.5534	535.943	13.4395	97.1341
He5-JHO23-Sample 1 Spot 58	304.755	18720.6	1.05142	16.9451	1.21185	0.705761	2.87614	0.0867742	2.60837	0.9069	536.431	13.4258	542.226	12.0837	567.633	26.3927	536.431	13.4258	94.503
He5-JHO23-Sample 1 Spot 42	72.7134	39909.8	0.818275	16.8163	1.63715	0.719126	3.08692	0.0877453	2.61703	0.847779	542.188	13.6089	550.151	13.1123	584.181	35.5213	542.188	13.6089	92.8117
He5-JHO23-Sample 1 Spot 39	502.375	29148.1	7.46966	17.2045	1.13315	0.705649	2.83979	0.0880883	2.60392	0.91694	544.221	13.5894	542.159	11.9299	534.474	24.8192	544.221	13.5894	101.824
He5-JHO23-Sample 1 Spot 45	451.684	28052.8	3.04708	17.1207	1.08462	0.714709	2.9501	0.0887848	2.74348	0.929962	548.346	14.4217	547.539	12.4861	545.132	23.7224	548.346	14.4217	100.59
He5-JHO23-Sample 1 Spot 4	109.052	13554.4	1.95268	16.4522	1.1739	0.851516	2.68205	0.10165	2.4115	0.899126	624.068	14.3439	625.481	12.5252	631.55	25.2909	624.068	14.3439	98.8154
He5-JHO23-Sample 1 Spot 64	346.792	145784	106.779	15.4596	1.21747	0.980795	3.10684	0.110018	2.85836	0.920022	672.855	18.263	694.013	15.6215	764.072	25.658	672.855	18.263	88.0617
He5-JHO23-Sample 1 Spot 26	86.2905	64622.4	1.30397	15.4896	1.32126	1.06486	2.89561	0.11968	2.5766	0.889827	728.72	17.7538	736.218	15.1637	759.999	27.8438	728.72	17.7538	95.8844
He5-JHO23-Sample 1 Spot 14	34.7799	7826.32	2.98348	15.2599	1.54762	1.09835	3.01577	0.121613	2.58839	0.858285	739.84	18.0919	752.552	16.0298	791.423	32.4934	739.84	18.0919	93.4822
He5-JHO23-Spot 117 Rim	477.645	57443.8	8.4065	14.3713	1.04962	1.21459	3.12552	0.126652	2.94401	0.941926	768.74	21.3345	807.298	17.4073	916.097	21.5748	768.74	21.3345	83.9148
He5-JHO23-Sample 1 Spot 36	129.769	109351	2.09842	15.1643	1.31972	1.19252	2.98919	0.131213	2.68209	0.897263	794.781	20.0551	797.13	16.5099	804.592	27.6533	794.781	20.0551	98.7807
He5-JHO23-Sample 1 Spot 50	111.807	11810.5	0.69964	15.2616	1.325	1.18872	2.99716	0.131633	2.68838	0.896974	797.177	20.159	795.366	16.5298	791.19	27.8219	797.177	20.159	100.757
He5-JHO23-Sample 1 Spot 16	151.022	32895.5	1.66712	15.1041	1.23946	1.21413	3.46177	0.13306	3.23227	0.933706	805.3	24.4694	807.086	19.2771	812.946	25.9177	805.3	24.4694	99.0594
He5-JHO23-Sample 1 Spot 24	216.109	11373.4	1.34114	14.5332	1.41059	1.48452	2.95552	0.156543	2.59718	0.878754	937.539	22.6618	924.079	17.933	892.983	29.1249	892.983	29.1249	104.99
He5-JHO23-Sample 1 Spot 2	27.9861	6053.86	0.601465	14.5058	1.42587	1.46557	2.77269	0.154253	2.37796	0.857638	924.761	20.486	916.304	16.7363	896.895	29.4207	896.895	29.4207	103.107
He5-JHO23-Sample 1 Spot 52	402.894	37735.6	2.21628	14.4749	1.2644	1.42405	3.15546	0.149565	2.89106	0.916208	898.526	24.2479	899.062	18.8246	901.259	26.0635	898.526	24.2479	99.6967
He5-JHO23-Sample 1 Spot 55	93.6466	6463.4	0.74824	14.7734	1.37972	1.4004	3.03838	0.150114	2.70706	0.890953	901.6	22.777	889.104	18.0006	859.03	28.6569	901.6	22.777	104.956
He5-JHO23-Sample 1 Spot 67	211.066	50284.4	1.71675	14.3643	1.39232	1.51287	2.7288	0.157679	2.34687	0.860037	943.865	20.606	935.601	16.6829	917.103	28.6296	917.103	28.6296	102.918
He5-JHO23-Sample 1 Spot 1	64.2032	24528.2	5.12176	14.2826	1.21492	1.47089	2.20686	0.152431	1.84234	0.834824	914.579	15.709	918.492	13.34	928.794	24.9536	928.794	24.9536	98.4695
He5-JHO23-Sample 1 Spot 25	423.894	59313	2.19908	14.0982	1.34934	1.59259	3.71481	0.162913	3.46108	0.931698	972.946	31.2566	967.314	23.1746	955.409	27.5917	955.409	27.5917	101.835
He5-JHO23-Sample 1 Spot 11	270.041	38504.2	0.536019	13.8764	1.11425	1.56241	2.71035	0.157311	2.47072	0.911587	941.815	21.6497	955.423	16.7819	987.766	22.6523	987.766	22.6523	95.348
He5-JHO23-Sample 1 Spot 53	289.781	116545	4.42791	13.8354	1.09082	1.51303	3.1011	0.151889	2.90292	0.936093	911.544	24.6758	935.665	18.9603	993.775	22.1746	993.775	22.1746	91.7254
He5-JHO23-Sample 1 Spot 6	121.371	43137.2	1.02838	13.7878	1.09418	1.69016	2.41651	0.169088	2.1546	0.891615	1007.08	20.0887	1004.82	15.4171	1000.77	22.2183	1000.77	22.2183	100.631
He5-JHO23-Sample 1 Spot 10	272.131	127635	3.22142	13.4894	1.27387	1.75646	2.61923	0.171917	2.28858	0.873762	1022.66	21.6425	1029.55	16.9485	1045.09	25.7147	1045.09	25.7147	97.8539
He5-JHO23-Sample 1 Spot 31	316.764	47672.6	0.484369	13.4637	1.27025	1.75639	3.63971	0.171582	3.41085	0.937123	1020.82	32.2021	1029.52	23.5534	1048.94	25.6259	1048.94	25.6259	97.3196
He5-JHO23-Sample 1 Spot 5	356.686	193545	1.6099	13.1891	1.11027	1.89683	2.90982	0.181523	2.68968	0.924345	1075.29	26.6385	1079.98	19.3488	1090.31	22.2253	1090.31	22.2253	98.6227
He5-JHO23-Sample 1 Spot 49	493.753	140528	5.27489	13.0383	1.29431	1.9392	3.68844	0.183456	3.45389	0.936409	1085.83	34.5152	1094.72	24.7145	1113.31	25.8488	1113.31	25.8488	97.5314
He5-JHO23-Sample 1 Spot 22	484.969	36245.8	4.00533	13.0024	1.12434	1.81235	2.90433	0.170984	2.67787	0.922027	1017.53	25.2066	1049.93	19.0064	1118.84	22.4218	1118.84	22.4218	90.9451
He5-JHO23-Sample 1 Spot 7	177.816	71544.2	1.18526	13.0015	1.00847	1.878	3.07132	0.177165	2.90104	0.944556	1051.47	28.1458	1073.36	20.3525	1118.98	20.0986	1118.98	20.0986	93.9663
He5-JHO23-Spot 112 Rim	688.049	137073	20.8035	12.9888	0.824429	1.94781	2.35492	0.183571	2.2059	0.936717	1086.45	22.0554	1097.69	15.8011	1120.93	16.4595	1120.93	16.4595	96.924
He5-JHO23-Sample 1 Spot 70b Rim	176.85	52930.8	1.39425	12.5532	1.263	2.16607	2.89113	0.197294	2.60066	0.899533	1160.77	27.626	1170.22	20.0866	1188.63	24.9485	1188.63	24.9485	97.6561
He5-JHO23-Sample 1 Spot 32	115.061	29918.8	0.931981	12.5256	0.991344	2.25555	2.6024	0.204994	2.40618	0.924602	1202.09	26.3879	1198.52	18.3096	1192.97	19.552	1192.97	19.552	100.765
He5-JHO23-Sample 1 Spot 27	321.026	41376.2	5.17226	12.109	1.33531	2.43947	3.86138	0.214335	3.62315	0.938304	1251.87	41.2254	1254.32	27.8154	1259.39	26.0834	1259.39	26.0834	99.4027
He5-JHO23-Sample 1 Spot 9	388.094	336587	1.38857	11.3659	1.04173	2.77653	3.01809	0.228978	2.83261	0.938543	1329.14	34.0219	1349.25	22.5343	1382.09	20.0149	1382.09	20.0149	96.1686
He5-JHO23-Sample 1 Spot 8	374.614	34345.5	1.06537	10.7254	1.11641	3.27512	2.99032	0.254876	2.7741	0.927695	1463.57	36.3223	1475.16	23.265	1492.68	21.13	1492.68	21.13	98.0497
He5-JHO23-Sample 1 Spot 63	30.3391	14188.6	1.22216	9.91789	1.37084	4.1395	3.29701	0.297889	2.99851	0.909464	1680.83	44.3657	1662.14	26.9699	1639.39	25.4488	1639.39	25.4488	102.528
He5-JHO23-Sample 1 Spot 12	496.074	506575	2.23375	8.8858	1.12928	4.23742	3.26366	0.273203	3.06205	0.938228	1557.04	42.357	1681.3	26.8176	1840.8	20.4439	1840.8	20.4439	84.5849
He5-JHO23-Sample 1 Spot 37	737.524	130332	1.42796	8.82748	0.921697	5.44965	2.55677	0.349054	2.38486	0.932762	1930.08	39.7786	1892.7	21.9392	1852.72	16.6614	1852.72	16.6614	104.176
He5-JHO23-Sample 1 Spot 59	173.761	70138	1.3877	8.80045	1.08364	5.06674	2.55004	0.323535	2.30834	0.905216	1806.97	36.3755	1830.56	21.628	1858.25	19.5762	1858.25	19.5762	97.2403
He5-JHO23-Sample 1 Spot 21	331.656	227559	3.51517	8.77016	1.12501	5.36344	3.81345	0.341302	3.64373	0.955494	1892.93	59.7708	1879.04	32.6474	1864.48	20.3083	1864.48	20.3083	101.526
He5-JHO23-Sample 1 Spot 69	292.073	619650	3.50405	8.71567	1.45627	5.45088	3.69524	0.344711	3.39619	0.91907	1909.29	56.1238	1892.89	31.7148	1875.73	26.2519	1875.73	26.2519	101.79
He5-JHO23-Spot 114 Rim	236.475	76905.4	8.16058	8.69347	1.42992	5.49128	3.48967	0.346381	3.18326	0.912195	1917.29	52.7941	1899.23	29.9836	1880.32	25.7644	1880.32	25.7644	101.966
He5-JHO23-Sample 1 Spot 62	596.515	76309.9	3.10612	8.68641	1.38495	4.87602	4.09415	0.307322	3.85279	0.941047	1727.52	58.387	1798.12	34.5098	1881.79	24.9496	1881.79	24.9496	91.8019
He5-JHO23-Sample 1 Spot 3	133.358	346921	1.89679	6.64401	1.26274	7.65854	3.33909	0.369202	3.09112	0.925736	2025.65	53.733	2191.75	29.9976	2351.73	21.5806	2351.73	21.5806	86.1343
He5-JHO23-Sample 1 Spot 18	57.6475	38552.4	1.29467	6.28795	1.24809	10.3316	2.8107	0.471373	2.5184	0.896003	2489.58	52.0109	2464.94	26.0265	2445.41	21.1255	2445.41	21.1255	101.806
He5-JHO23-Sample 1 Spot 17	93.9506	38075.2	1.8388	6.27555	1.36115	10.457	2.87133	0.476155	2.5282	0.880498	2510.5	52.5722	2476.12	26.6164	2448.75	23.0319	2448.75	23.0319	102.522
He5-JHO23-Sample 1 Spot 40	218.835	85232.6	2.12739	6.27151	1.26206	9.29524	2.87099	0.42298	2.57872	0.898199	2274	49.4142	2367.55	26.3259	2449.84	21.3524	2449.84	21.3524	92.8223
He5-JHO23-Sample 1 Spot 34	109.173	29313.2	1.09411	6.25942	1.3153	9.60808	2.66024	0.436373	2.31233	0.869217	2334.38	45.2862	2397.94	24.47	2453.1	22.2461	2453.1	22.2461	95.1605
He5-JHO23-Sample 1 Spot 30	54.6801	43272.4	0.537207	6.22728	1.06129	10.2438	2.39956	0.462857	2.15211	0.896875	2452.16	43.8969	2457.04	22.2013	2461.8	17.9332	2461.8	17.9332	99.6083
He5-JHO23-Sample 1 Spot 54	156.906	81236.5	1.25381	6.16685	1.32508	10.0391	3.4235	0.449205	3.15667	0.922057	2391.72	63.0777	2438.38	31.6229	2478.26	22.3547	2478.26	22.3547	96.5078
He5-JHO23-Sample 1 Spot 28	554.276	109633	0.914058	6.13942	1.40246	10.6941	3.53903	0.476385	3.24929	0.918128	2511.5	67.5896	2496.91	32.8733	2485.78	23.6397	2485.78	23.6397	101.034
He5-JHO23-Sample 1 Spot 15	172.753	79159.3	1.28837	6.10519	1.15975	9.98999	2.98951	0.442539	2.75539	0.921684	2362	54.4923	2433.86	27.5997	2495.21	19.5319	2495.21	19.5319	94.6614
He5-JHO23-Sample 1 Spot 65	327.317	419577	1.35501	6.08776	1.07966	10.9431	2.99914	0.483377	2.79806	0.932956	2541.96	58.779	2518.31	27.9099	2500.02	18.1739	2500.02	18.1739	101.677
He5-JHO23-Sample 1 Spot 13	30.444	21611.1	2.67773	5.40341	1.57204	13.5806	4.29912	0.532446	4.00139	0.930746	2751.75	89.6287	2720.91	40.6804	2698.81	25.961	2698.81	25.961	101.962
He5-JHO23-Sample 1 Spot 41	129.744	247097	3.81688	4.87933	1.35655	15.8426	3.47155	0.560887	3.19553	0.920492	2870.29	74.026	2867.35	33.1685	2865.99	22.0622	2865.99	22.0622	100.15
He12_JHPM16-O2-3-Run2-Spot 21	2296.31	14186.1	5.75489	17.3286	1.11594	0.194863	1.45336	0.0245008	0.931091	0.640648	156.038	1.43542	180.77	2.40666	518.674	24.5119	156.038	1.43542	NA
He12_JHPM16-O2-3-Run2-Spot137	104.66	2773.48	1.11682	19.4304	2.38473	0.193817	2.61992	0.027325	1.08491	0.4141	173.784	1.86022	179.881	4.31891	261.76	54.7602	173.784	1.86022	NA
He12_JHPM16-O2-3-Run2-Spot 135	258.951	5176.65	2.4547	15.662	2.41783	0.317568	2.72085	0.0360888	1.24783	0.458619	228.544	2.80188	280.03	6.65892	736.642	51.1679	228.544	2.80188	NA
He12_JHPM16-O2-3-Run2-Spot 59	463.622	18694.6	2.67018	18.8028	0.872543	0.267358	1.7263	0.0364756	1.48956	0.862861	230.95	3.37924	240.579	3.69778	336.627	19.7704	230.95	3.37924	NA
He12_JHPM16-O2-3-Run2-Spot 87	479.996	4552.4	1.35727	20.0155	3.21796	0.255645	3.84327	0.0371271	2.1013	0.546747	235.001	4.84914	231.151	7.94529	193.212	74.8393	235.001	4.84914	NA
He12_JHPM16-O2-3-Run2-Spot 128	598.962	6369.73	0.9799	19.2291	2.26691	0.294822	4.59137	0.0411345	3.99271	0.869613	259.862	10.1692	262.348	10.6154	285.615	51.8168	259.862	10.1692	NA
He12_JHPM16-O2-3-Run2-Spot 53	82.6293	4948.55	2.01503	18.2609	1.60954	0.31094	2.13322	0.0411991	1.40001	0.656288	260.261	3.57111	274.909	5.13765	402.486	36.0499	260.261	3.57111	NA
He12_JHPM16-O2-3-Run2-Spot 109	384.825	7047.05	2.19358	19.4012	1.36309	0.312118	1.88187	0.0439375	1.29747	0.689456	277.193	3.52026	275.822	4.54537	265.202	31.2681	277.193	3.52026	NA
He12_JHPM16-O2-3-Run2-Spot 1	223.929	44998	1.0224	17.7927	1.00213	0.401675	1.6674	0.0518568	1.33265	0.799238	325.911	4.23529	342.862	4.85177	460.363	22.2409	325.911	4.23529	NA
He12_JHPM16-O2-3-Run2-Spot 150	102.444	3440.08	0.839648	18.0911	1.11211	0.412667	1.57866	0.0541691	1.12044	0.709742	340.067	3.71149	350.794	4.68254	423.38	24.8174	340.067	3.71149	NA
He12_JHPM16-O2-3-Run2-Spot 119	137.168	7217.3	0.91325	17.2511	0.850867	0.64845	1.31716	0.0811671	1.00545	0.763347	503.085	4.86591	507.524	5.26104	528.554	18.6425	503.085	4.86591	95.1814
He12_JHPM16-O2-3-Run2-Spot 19	1665.79	68427.1	0.950999	17.1833	0.859999	0.65694	1.40452	0.081907	1.11044	0.79062	507.495	5.41934	512.74	5.65434	537.159	18.8396	507.495	5.41934	94.4776
He12_JHPM16-O2-3-Run2-Spot 145	1332.06	139777	3.97256	17.0234	0.760724	0.664373	1.38318	0.0820626	1.1552	0.835176	508.422	5.64765	517.286	5.60627	557.597	16.5949	508.422	5.64765	91.181
He12_JHPM16-O2-3-Run2-Spot 76	3588.91	28850.1	34.9224	16.8581	1.00442	0.671633	1.49647	0.082154	1.10931	0.741285	508.967	5.4289	521.705	6.10514	578.79	21.8077	508.967	5.4289	87.9363
He12_JHPM16-O2-3-Run2-Spot 22	101.092	7500.53	0.711063	16.7482	1.90064	0.679874	2.21613	0.0826198	1.13963	0.514246	511.741	5.6065	526.698	9.10726	592.986	41.2237	511.741	5.6065	86.299
He12_JHPM16-O2-3-Run2-Spot 143	1206.35	67721.9	0.974595	17.0423	0.875327	0.670403	1.32138	0.0828997	0.989867	0.749118	513.407	4.88495	520.957	5.38487	555.124	19.0834	513.407	4.88495	92.4851
He12_JHPM16-O2-3-Run2-Spot 106	182.687	3378.97	0.534776	17.5637	1.09897	0.650509	1.54351	0.0829003	1.08383	0.702185	513.411	5.34868	508.792	6.17704	489.022	24.2451	513.411	5.34868	104.987
He12_JHPM16-O2-3-Run2-Spot 68	213.932	68374.3	0.531633	16.9154	0.911092	0.679888	1.41733	0.0834464	1.0857	0.766016	516.661	5.39049	526.707	5.82457	571.419	19.8417	516.661	5.39049	90.4172
He12_JHPM16-O2-3-Run2-Spot 132	682.873	58986.7	2.35854	17.1942	0.805985	0.669108	1.31851	0.0834767	1.04348	0.791409	516.841	5.18259	520.17	5.36695	535.746	17.6517	516.841	5.18259	96.4714
He12_JHPM16-O2-3-Run2-Spot 120	231.65	5307.79	1.91758	17.32	0.903659	0.665218	1.49335	0.0835988	1.18891	0.796134	517.568	5.91287	517.801	6.05746	519.764	19.8117	517.568	5.91287	99.5775
He12_JHPM16-O2-3-Run2-Spot 136	271.775	96000.6	1.75119	16.6997	0.833773	0.690788	2.11863	0.0837032	1.94767	0.919306	518.189	9.69764	533.274	8.78925	599.271	18.0448	518.189	9.69764	86.4698
He12_JHPM16-O2-3-Run2-Spot 104	98.9519	4724.28	2.32402	16.9017	1.16677	0.682943	1.61876	0.0837535	1.12207	0.693167	518.488	5.59	528.552	6.67013	573.215	25.3755	518.488	5.59	90.4527
He12_JHPM16-O2-3-Run2-Spot 81	572.505	26055.6	1.39532	17.1519	0.736226	0.673716	1.1814	0.0838447	0.923949	0.782078	519.031	4.6076	522.969	4.82865	541.169	16.12	519.031	4.6076	95.9092
He12_JHPM16-O2-3-Run2-Spot 127	286.7	10154.4	1.81553	17.3956	0.885937	0.666623	1.61761	0.084141	1.35343	0.836686	520.793	6.77138	518.657	6.56981	510.201	19.4866	520.793	6.77138	102.076
He12_JHPM16-O2-3-Run2-Spot 79	72.5985	2279.36	2.33065	17.0743	3.54872	0.684722	3.76066	0.0848288	1.24466	0.330967	524.881	6.27408	529.624	15.5208	551.056	77.487	524.881	6.27408	95.2501
He12_JHPM16-O2-3-Run2-Spot 36	128.14	5455.81	2.24887	17.1939	2.02506	0.68212	2.32165	0.0850984	1.13541	0.489056	526.483	5.74017	528.055	9.55966	535.786	44.3224	526.483	5.74017	98.2637
He12_JHPM16-O2-3-Run2-Spot96	333.573	10230.2	1.82155	17.236	0.801941	0.700322	1.53437	0.0875834	1.30812	0.852546	541.229	6.79086	538.983	6.417	530.47	17.5892	541.229	6.79086	102.028
He12_JHPM16-O2-3-Run2-Spot 117	565.458	96407.9	1.3261	17.2417	0.680165	0.705409	1.36929	0.088249	1.18841	0.867906	545.173	6.21252	542.016	5.75099	529.737	14.9232	545.173	6.21252	102.914
He12_JHPM16-O2-3-Run2-Spot 148	93.0621	12318.3	0.802309	16.2256	0.904552	0.751154	1.25359	0.0884338	0.867915	0.692343	546.267	4.54581	568.894	5.46002	661.333	19.3654	546.267	4.54581	82.601
He12_JHPM16-O2-3-Run2-Spot 139	288.957	15092.5	0.353966	16.2539	0.945017	0.758591	1.46924	0.0894647	1.125	0.765698	552.371	5.95536	573.197	6.43535	657.61	20.2474	552.371	5.95536	83.9967
He12_JHPM16-O2-3-Run2-Spot 46	208.864	1.3111e+07	12.3367	16.3172	0.940451	0.791381	1.34553	0.0936954	0.96229	0.715175	577.355	5.3143	591.955	6.03568	649.243	20.2076	577.355	5.3143	88.9274
He12_JHPM16-O2-3-Run2-Spot 43	224.132	20907.8	218.139	16.5757	0.838314	0.810979	1.42909	0.0975368	1.15737	0.80987	599.957	6.63042	603.003	6.49815	615.389	18.1143	599.957	6.63042	97.4924
He12_JHPM16-O2-3-Run2-Spot 125	781.149	15100.1	5.47337	15.9015	0.803402	0.864561	1.57774	0.099752	1.35787	0.860643	612.955	7.93972	632.61	7.42837	704.408	17.0872	612.955	7.93972	87.0171
He12_JHPM16-O2-3-Run2-Spot 44	432.33	8847.89	6.30581	16.6549	1.15443	0.834409	1.68877	0.100834	1.23257	0.729861	619.296	7.27804	616.056	7.79994	605.085	24.9743	619.296	7.27804	102.349
He12_JHPM16-O2-3-Run2-Spot 95	239.489	11530.4	1.00476	16.535	0.891702	0.842668	1.38718	0.101099	1.0626	0.766019	620.847	6.28942	620.617	6.44135	620.696	19.2599	620.847	6.28942	100.024
He12_JHPM16-O2-3-Run2-Spot 83	98.0347	7540.83	1.03575	16.228	1.15327	0.864312	1.7158	0.101771	1.2704	0.740414	624.779	7.56469	632.474	8.07712	661.031	24.718	624.779	7.56469	94.5158
He12_JHPM16-O2-3-Run2-Spot 98	233.294	8577.76	1.44912	16.452	0.912106	0.883513	1.35389	0.105467	1.00054	0.739012	646.37	6.15356	642.878	6.44858	631.584	19.6449	646.37	6.15356	102.341
He12_JHPM16-O2-3-Run2-Spot 140	139.69	9653.69	2.20843	16.0383	0.901944	0.907021	1.36924	0.105552	1.0302	0.752388	646.861	6.34052	655.473	6.61267	686.177	19.2648	646.861	6.34052	94.2703
He12_JHPM16-O2-3-Run2-Spot 50	391.864	64783.2	2.41528	15.7986	1.12179	0.959144	1.65487	0.109949	1.21662	0.735179	672.45	7.76894	682.853	8.2266	718.199	23.8159	672.45	7.76894	93.6299
He12_JHPM16-O2-3-Run2-Spot 14	650.702	62908.2	3.56385	14.8957	0.927602	1.02894	1.38686	0.111209	1.03099	0.743398	679.763	6.65143	718.396	7.14152	841.934	19.2873	679.763	6.65143	80.7383
He12_JHPM16-O2-3-Run2-Spot 73	228.872	57341.4	6.14584	15.7506	0.767498	0.984219	1.41903	0.11248	1.19356	0.841111	687.137	7.7794	695.766	7.1471	724.653	16.2639	687.137	7.7794	94.8229
He12_JHPM16-O2-3-Run2-Spot 75	276.239	104565	1.77467	14.8678	0.829305	1.15075	2.2383	0.124141	2.079	0.92883	754.352	14.8002	777.597	12.1608	845.803	17.2655	754.352	14.8002	89.1876
He12_JHPM16-O2-3-Run2-Spot 11	313.789	49666.8	1.53144	15.2796	0.972271	1.14714	1.44546	0.127179	1.06959	0.73997	771.754	7.77966	775.894	7.84152	788.717	20.4089	771.754	7.77966	97.8492
He12_JHPM16-O2-3-Run2-Spot 63	283.029	111620	2.79375	14.7056	0.738309	1.20679	1.56313	0.128766	1.37778	0.881423	780.822	10.132	803.715	8.67973	868.617	15.3018	780.822	10.132	89.8926
He12_JHPM16-O2-3-Run2-Spot 144	263.777	16793.3	2.50712	15.2032	0.756898	1.16959	1.34456	0.129019	1.11128	0.826502	782.268	8.18646	786.452	7.35993	799.229	15.8808	782.268	8.18646	97.8779
He12_JHPM16-O2-3-Run2-Spot 149	66.6498	7081.93	2.0436	14.4595	1.31583	1.2343	1.87686	0.129497	1.33835	0.713081	784.997	9.89156	816.295	10.5283	903.462	27.1112	784.997	9.89156	86.8877
He12_JHPM16-O2-3-Run2-Spot 28	79.2144	18692.8	2.10322	14.401	0.978568	1.24156	1.47203	0.129732	1.09967	0.747044	786.337	8.14055	819.589	8.27892	911.81	20.1655	786.337	8.14055	86.2391
He12_JHPM16-O2-3-Run2-Spot 17	174.973	54348.7	1.26533	14.9128	0.575854	1.19943	1.10186	0.129784	0.939409	0.852566	786.634	6.95663	800.322	6.10135	839.504	11.9706	786.634	6.95663	93.7022
He12_JHPM16-O2-3-Run2-Spot 40	194.991	8041.63	1.09849	15.4062	0.820544	1.16743	1.3526	0.130502	1.07528	0.794975	790.727	8.00177	785.443	7.39763	771.361	17.2726	790.727	8.00177	102.511
He12_JHPM16-O2-3-Run2-Spot 102	184.081	9606	1.57092	15.1448	0.910167	1.2004	1.42671	0.13191	1.09869	0.770081	798.754	8.25389	800.773	7.90316	807.284	19.0568	798.754	8.25389	98.9434
He12_JHPM16-O2-3-Run2-Spot 29	145.467	25129.8	2.41791	15.2214	0.869794	1.19701	1.4439	0.132203	1.15252	0.798201	800.421	8.67532	799.206	7.98808	796.711	18.255	800.421	8.67532	100.466
He12_JHPM16-O2-3-Run2-Spot 92	136.236	21760.5	0.974133	14.9837	1.01985	1.21842	1.46497	0.132466	1.05169	0.717891	801.916	7.9302	809.051	8.16998	829.645	21.2684	801.916	7.9302	96.6578
He12_JHPM16-O2-3-Run2-Spot 142	235.085	3.15187e+06	1.62935	14.7678	0.887318	1.24724	1.33302	0.133645	0.994792	0.746269	808.627	7.56008	822.158	7.51234	859.821	18.4015	808.627	7.56008	94.046
He12_JHPM16-O2-3-Run2-Spot 23	202.988	8145.94	1.97384	15.3123	0.888072	1.22203	1.44638	0.135772	1.14164	0.789307	820.709	8.79761	810.704	8.07705	784.228	18.6548	820.709	8.79761	104.652
He12_JHPM16-O2-3-Run2-Spot 99	194.994	18389.3	1.71339	15.0194	1.0269	1.25111	1.8764	0.136344	1.57046	0.836956	823.955	12.1471	823.907	10.5894	824.672	21.4519	823.955	12.1471	99.913
He12_JHPM16-O2-3-Run2-Spot 105	82.3844	12662.2	1.09486	14.3758	1.10378	1.31837	1.73597	0.137517	1.33988	0.771833	830.605	10.442	853.799	10.024	915.458	22.6908	830.605	10.442	90.7311
He12_JHPM16-O2-3-Run2-Spot 55	90.3716	7718.34	1.20162	14.8219	0.841391	1.28219	1.2564	0.137894	0.93306	0.742646	832.743	7.28906	837.829	7.16747	852.228	17.4786	832.743	7.28906	97.7136
He12_JHPM16-O2-3-Run2-Spot 110	85.2307	4910.94	1.31034	14.7305	0.996701	1.31227	1.33245	0.140258	0.884312	0.663674	846.122	7.01211	851.125	7.67845	865.108	20.6626	846.122	7.01211	97.8054
He12_JHPM16-O2-3-Run2-Spot 61	599.897	37483.9	6.1595	14.4709	0.68049	1.34437	1.1443	0.141157	0.91998	0.803965	851.202	7.33591	865.123	6.663	901.83	14.038	851.202	7.33591	94.3861
He12_JHPM16-O2-3-Run2-Spot 8	760.158	75587.3	50.3643	14.3461	0.5746	1.39959	1.1286	0.145687	0.97138	0.860692	876.743	7.96276	888.763	6.68408	919.709	11.8146	876.743	7.96276	95.3283
He12_JHPM16-O2-3-Run2-Spot 101	416.355	10048.1	4.24463	14.6766	1.37893	1.43058	2.75826	0.152343	2.38884	0.866068	914.086	20.3586	901.791	16.4856	872.68	28.563	914.086	20.3586	104.745
He12_JHPM16-O2-3-Run2-Spot 65	245.192	34471.7	3.6626	14.3111	0.843672	1.45881	1.42458	0.151482	1.14789	0.805773	909.264	9.73467	913.519	8.58226	924.729	17.3538	924.729	17.3538	98.3276
He12_JHPM16-O2-3-Run2-Spot 51	142.355	28507.5	1.77818	14.2311	0.77072	1.48761	1.42015	0.153609	1.19281	0.839923	921.162	10.2388	925.342	8.62344	936.206	15.7959	936.206	15.7959	98.393
He12_JHPM16-O2-3-Run2-Spot 38	346.399	15525.2	1.97112	14.0624	1.01602	1.47936	1.68023	0.150946	1.33823	0.79646	906.265	11.314	921.967	10.18	960.636	20.7784	960.636	20.7784	94.3401
He12_JHPM16-O2-3-Run2-Spot 33	130.461	3933.08	1.35994	14.0466	0.871616	1.60935	1.4017	0.164025	1.09774	0.783153	979.104	9.97163	973.855	8.77835	962.941	17.7925	962.941	17.7925	101.678
He12_JHPM16-O2-3-Run2-Spot 90	150.354	10149.5	0.724113	14.0157	0.706015	1.5889	1.53246	0.161585	1.36014	0.887553	965.578	12.197	965.866	9.55025	967.392	14.4297	967.392	14.4297	99.8124
He12_JHPM16-O2-3-Run2-Spot 129	88.3342	17982.4	1.32136	13.9998	1.05363	1.56814	1.65392	0.159293	1.27488	0.770823	952.844	11.2925	957.693	10.2548	969.742	21.4819	969.742	21.4819	98.2575
He12_JHPM16-O2-3-Run2-Spot 94	248.077	21040.9	2.16336	13.9357	0.731238	1.49859	1.45842	0.15153	1.26186	0.865221	909.536	10.7042	929.812	8.88201	979.065	14.8975	979.065	14.8975	92.8984
He12_JHPM16-O2-3-Run2-Spot 70	321.15	75003.2	1.21431	13.9251	0.876859	1.5685	1.41895	0.158478	1.11559	0.786206	948.315	9.83794	957.833	8.79858	980.62	17.8413	980.62	17.8413	96.7057
He12_JHPM16-O2-3-Run2-Spot 67	145.072	27353.7	1.12744	13.8419	1.31007	1.40551	1.83855	0.141162	1.28996	0.701615	851.229	10.2864	891.266	10.9081	992.838	26.6252	992.838	26.6252	85.7369
He12_JHPM16-O2-3-Run2-Spot 103	521.551	50005.2	2.13751	13.6685	0.773973	1.75957	1.40981	0.174508	1.17836	0.835829	1036.9	11.2864	1030.69	9.12785	1018.4	15.6745	1018.4	15.6745	101.817
He12_JHPM16-O2-3-Run2-Spot 30	74.5026	7340.47	0.932815	13.6498	1.00528	1.63551	1.38384	0.161982	0.951017	0.687228	967.782	8.54622	983.983	8.71999	1021.17	20.3503	1021.17	20.3503	94.7723
He12_JHPM16-O2-3-Run2-Spot 49	84.5115	7698.7	5.03631	13.6482	1.08576	1.78284	1.71613	0.176553	1.329	0.774416	1048.11	12.856	1039.21	11.164	1021.4	21.9789	1021.4	21.9789	102.615
He12_JHPM16-O2-3-Run2-Spot 107	161.967	8050.11	0.808117	13.5376	0.746096	1.72645	1.51061	0.169584	1.3135	0.869516	1009.82	12.2773	1018.43	9.71296	1037.85	15.085	1037.85	15.085	97.2992
He12_JHPM16-O2-3-Run2-Spot 100	272.397	55965.1	4.80428	13.4285	0.812367	1.71665	3.6103	0.167262	3.51772	0.974356	997.008	32.4946	1014.77	23.1684	1054.21	16.3822	1054.21	16.3822	94.5743
He12_JHPM16-O2-3-Run2-Spot 27	242.275	13694.9	1.50548	13.3776	0.83044	1.82807	1.51525	0.177443	1.26741	0.836441	1052.99	12.3128	1055.59	9.94557	1061.86	16.7092	1061.86	16.7092	99.1653
He12_JHPM16-O2-3-Run2-Spot 71	113.321	30321	1.50246	13.3092	0.61935	1.80423	1.0976	0.174233	0.906157	0.825584	1035.39	8.66759	1046.99	7.17064	1072.17	12.4419	1072.17	12.4419	96.57
He12_JHPM16-O2-3-Run2-Spot 72	617.375	659183	13.8192	13.1158	0.864112	1.81657	1.51567	0.172876	1.24522	0.821564	1027.94	11.8317	1051.45	9.92615	1101.46	17.2823	1101.46	17.2823	93.3248
He12_JHPM16-O2-3-Run2-Spot 138	317.262	46582.9	1.77784	13.0357	0.756756	1.97188	1.32836	0.18651	1.09172	0.821857	1102.44	11.0627	1105.95	8.94962	1113.71	15.0914	1113.71	15.0914	98.9885
He12_JHPM16-O2-3-Run2-Spot 97	270.831	100078	1.56043	12.9232	0.937232	1.99126	1.54403	0.186717	1.22704	0.794698	1103.57	12.4455	1112.55	10.437	1131.03	18.6767	1131.03	18.6767	97.572
He12_JHPM16-O2-3-Run2-Spot 113	429.517	40597.4	1.76881	12.8181	0.579945	2.08941	1.30524	0.194328	1.16932	0.895867	1144.78	12.2648	1145.33	8.96351	1147.23	11.5218	1147.23	11.5218	99.7862
He12_JHPM16-O2-3-Run2-Spot 25	149.928	28219.5	1.32067	12.6939	0.976588	1.97061	1.56405	0.181503	1.22169	0.781107	1075.18	12.0984	1105.51	10.5354	1166.54	19.3639	1166.54	19.3639	92.168
He12_JHPM16-O2-3-Run2-Spot 24	152.702	10087.9	7.68217	12.5395	0.731476	2.239	1.33907	0.203715	1.12162	0.837617	1195.24	12.2367	1193.34	9.39913	1190.75	14.4207	1190.75	14.4207	100.378
He12_JHPM16-O2-3-Run2-Spot 131	466.302	62807.2	2.56057	12.4255	0.616099	2.21822	1.4996	0.199988	1.36719	0.911706	1175.26	14.6884	1186.81	10.4956	1208.79	12.1477	1208.79	12.1477	97.2258
He12_JHPM16-O2-3-Run2-Spot 122	36.3302	5138.43	0.841604	12.4167	1.3339	2.1651	1.74991	0.195062	1.13265	0.647262	1148.74	11.9178	1169.91	12.1551	1210.15	26.2582	1210.15	26.2582	94.9253
He12_JHPM16-O2-3-Run2-Spot 118	20.9159	2995.52	2.34504	12.3144	1.49021	1.89234	1.85096	0.169083	1.09788	0.593139	1007.06	10.2359	1078.4	12.297	1226.41	29.2664	1226.41	29.2664	82.1141
He12_JHPM16-O2-3-Run2-Spot 82	28.1334	3948.06	1.10062	12.1816	1.08151	2.08539	1.48234	0.184322	1.01373	0.683875	1090.54	10.1707	1144.01	10.1735	1247.7	21.1742	1247.7	21.1742	87.4045
He12_JHPM16-O2-3-Run2-Spot 91	22.8602	3910.73	0.372706	11.7924	1.15343	2.56412	1.67303	0.219395	1.21187	0.724355	1278.68	14.0558	1290.47	12.2219	1310.96	22.3819	1310.96	22.3819	97.5375
He12_JHPM16-O2-3-Run2-Spot 35	126.033	13618.4	1.53372	11.314	0.84886	2.55372	1.65382	0.209642	1.41935	0.858225	1226.91	15.8573	1287.5	12.0678	1390.87	16.2884	1390.87	16.2884	88.2118
He12_JHPM16-O2-3-Run2-Spot 31	221.963	10104.3	1.52413	11.1515	0.807176	2.92075	1.70323	0.236328	1.49982	0.880574	1367.58	18.4817	1387.3	12.8841	1418.58	15.4302	1418.58	15.4302	96.4046
He12_JHPM16-O2-3-Run2-Spot 77	57.172	11962.3	1.28387	10.9334	0.819416	3.03266	1.45324	0.240584	1.20019	0.825874	1389.73	15.0041	1415.88	11.0973	1456.24	15.5847	1456.24	15.5847	95.433
He12_JHPM16-O2-3-Run2-Spot 62	818.805	158406	5.37679	10.4033	0.591917	3.63146	1.03647	0.274121	0.850822	0.820887	1561.69	11.8002	1556.45	8.25199	1550.16	11.1178	1550.16	11.1178	100.743
He12_JHPM16-O2-3-Run2-Spot 5	98.6336	15301	0.973952	10.3551	0.914308	3.34806	1.2565	0.251557	0.861871	0.685932	1446.5	11.1673	1492.34	9.82431	1558.88	17.1521	1558.88	17.1521	92.7908
He12_JHPM16-O2-3-Run2-Spot 146	84.6794	4542.08	1.68166	10.3037	0.756626	3.67067	1.37418	0.274426	1.14712	0.834767	1563.23	15.9235	1565.01	10.9662	1568.22	14.1763	1568.22	14.1763	99.6817
He12_JHPM16-O2-3-Run2-Spot 26	252.084	18440.4	1.69154	10.2623	0.740873	3.65188	1.31859	0.271924	1.09077	0.827227	1550.56	15.0328	1560.92	10.511	1575.75	13.8675	1575.75	13.8675	98.4014
He12_JHPM16-O2-3-Run2-Spot 115	77.4274	34918.1	0.809724	10.1874	0.729334	3.17591	1.4621	0.234757	1.26721	0.866702	1359.38	15.5311	1451.32	11.2913	1589.46	13.6287	1589.46	13.6287	85.5248
He12_JHPM16-O2-3-Run2-Spot 80	236.459	19365.1	2.86303	9.915	0.727943	4.11928	1.25204	0.296348	1.01868	0.813614	1673.17	15.0119	1658.13	10.23	1639.93	13.5142	1639.93	13.5142	102.027
He12_JHPM16-O2-3-Run2-Spot 88	82.3833	6946.17	1.59218	9.54362	1.13204	4.42091	1.46993	0.306135	0.937638	0.63788	1721.66	14.167	1716.27	12.1727	1710.48	20.8272	1710.48	20.8272	100.654
He12_JHPM16-O2-3-Run2-Spot 39	229.324	14992.9	1.19559	9.13894	0.747177	4.82805	2.69154	0.320151	2.58576	0.960696	1790.47	40.4244	1789.8	22.6439	1789.79	13.6104	1789.79	13.6104	100.038
He12_JHPM16-O2-3-Run2-Spot 12	78.0894	8107.16	0.808099	9.0929	0.651243	4.90435	1.18655	0.323573	0.991859	0.835918	1807.15	15.6312	1803.01	10.0078	1798.99	11.851	1798.99	11.851	100.454
He12_JHPM16-O2-3-Run2-Spot 60	126.81	42369.7	2.01609	8.98946	0.811525	4.97213	1.22912	0.324313	0.923125	0.751046	1810.76	14.5731	1814.6	10.3909	1819.78	14.7284	1819.78	14.7284	99.5043
He12_JHPM16-O2-3-Run2-Spot 116	134.524	16168.3	2.45635	8.81769	1.00483	5.32682	1.63104	0.340809	1.28476	0.787694	1890.56	21.0517	1873.18	13.9446	1854.72	18.16	1854.72	18.16	101.932
He12_JHPM16-O2-3-Run2-Spot 147	362.958	74628.5	5.86899	8.72732	0.687167	5.17586	1.39385	0.327756	1.21269	0.870029	1827.5	19.2975	1848.65	11.8618	1873.32	12.3923	1873.32	12.3923	97.5542
He12_JHPM16-O2-3-Run2-Spot 121	169.228	27461	2.76306	8.67022	0.964642	5.37913	3.47197	0.3384	3.33527	0.960628	1878.97	54.3631	1881.54	29.7359	1885.14	17.3698	1885.14	17.3698	99.6723
He12_JHPM16-O2-3-Run2-Spot 47	1598.06	126384	24.0459	8.34495	0.795584	5.05817	3.00207	0.30627	2.89474	0.964245	1722.33	43.7527	1829.12	25.4562	1953.72	14.209	1953.72	14.209	88.1564
He12_JHPM16-O2-3-Run2-Spot 15	814.207	519222	3.48528	8.29097	0.669056	5.18955	2.83216	0.312193	2.752	0.971696	1751.49	42.2083	1850.9	24.1157	1965.29	11.9327	1965.29	11.9327	89.1208
He12_JHPM16-O2-3-Run2-Spot 78	417.601	66419.6	4.20142	6.56864	0.669216	8.24427	1.23975	0.39293	1.04361	0.841793	2136.4	18.9777	2258.22	11.2269	2371.21	11.4149	2371.21	11.4149	90.0977
He12_JHPM16-O2-3-Run2-Spot 69	70.4377	10647.1	0.764567	6.12904	0.660149	10.5382	1.24019	0.468646	1.04989	0.846557	2477.62	21.5969	2483.28	11.5017	2488.64	11.1265	2488.64	11.1265	99.5573
He12_JHPM16-O2-3-Run2-Spot 74	53.3776	220348	1.46423	6.12216	0.69775	10.9214	1.5468	0.485145	1.38048	0.892477	2549.64	29.0706	2516.46	14.3894	2490.53	11.758	2490.53	11.758	102.373
He12_JHPM16-O2-3-Run2-Spot 85	59.7363	2.57522e+07	1.18803	6.08865	0.773693	10.6316	1.30604	0.469685	1.05221	0.805648	2482.18	21.6773	2491.47	12.1218	2499.77	13.0228	2499.77	13.0228	99.2963
He12_JHPM16-O2-3-Run2-Spot 7	78.734	23490.1	0.828328	6.02082	0.672615	10.9239	1.81855	0.477221	1.68959	0.929087	2515.15	35.1867	2516.67	16.9182	2518.61	11.3001	2518.61	11.3001	99.8627
He12_JHPM16-O2-3-Run2-Spot 141	411.516	60676.2	37.2205	6.01705	0.663766	10.5336	1.49223	0.459883	1.33647	0.895622	2439.04	27.14	2482.88	13.839	2519.66	11.1502	2519.66	11.1502	96.8002
He12_JHPM16-O2-3-Run2-Spot 34	62.3866	13398.4	1.37177	5.90524	0.669187	11.2174	1.21692	0.480636	1.01641	0.83523	2530.04	21.2695	2541.36	11.3455	2551.13	11.2063	2551.13	11.2063	99.1732
He12_JHPM16-O2-3-Run2-Spot 3	379.141	212407	3.49605	5.815	0.744329	11.1693	1.68641	0.471263	1.51326	0.897325	2489.1	31.2469	2537.36	15.7176	2576.89	12.4367	2576.89	12.4367	96.5932
He12_JHPM16-O2-3-Run2-Spot 130	70.2216	39312.9	1.4346	5.68198	0.691242	11.4307	1.31421	0.47126	1.11773	0.850499	2489.08	23.0796	2558.94	12.2713	2615.47	11.5067	2615.47	11.5067	95.1676
He12_JHPM16-O2-3-Run2-Spot 56	465.372	71434.3	3.57759	5.5767	0.847972	12.6791	1.21109	0.513043	0.864682	0.713972	2669.61	18.9007	2656.11	11.3987	2646.55	14.0707	2646.55	14.0707	100.871
He12_JHPM16-O2-3-Run2-Spot 57	68.4394	11067.9	25.6041	5.51124	0.731079	12.7372	1.21883	0.509343	0.975223	0.800133	2653.82	21.2152	2660.41	11.4753	2666.13	12.1112	2666.13	12.1112	99.5384
He12_JHPM16-O2-3-Run2-Spot 16	305.433	109392	1.11522	5.47763	0.70488	12.5663	1.54745	0.499445	1.37759	0.890231	2611.41	29.58	2647.7	14.5554	2676.26	11.6659	2676.26	11.6659	97.5768
He12_JHPM16-O2-3-Run2-Spot 84	90.8177	38072.2	1.78763	5.10863	0.930588	12.9271	1.49449	0.479175	1.16941	0.782479	2523.67	24.4209	2674.35	14.0862	2791.05	15.2356	2791.05	15.2356	90.4202
He12_JHPM16-O2-3-Run2-Spot 42	374.494	232165	2.02927	5.0942	0.711375	14.0422	1.41279	0.519037	1.22062	0.863981	2695.09	26.8864	2752.56	13.3923	2795.68	11.6445	2795.68	11.6445	96.4021
He12_JHPM16-O2-3-Run2-Spot 10	110.028	12186.7	1.67693	4.60371	0.814678	17.2584	1.66959	0.576495	1.45734	0.872871	2934.44	34.3546	2949.31	16.0256	2960.16	13.1428	2960.16	13.1428	99.1311
Notes: see Table S5a

## Sheet: P4-2
Table S5f. U-Pb geochronologic analyses.		JHPM16-P4-2
							Isotope ratios						Apparent ages (Ma)
Analysis	U	206Pb	U/Th	206Pb*	±	207Pb*	±	206Pb*	±	error	206Pb*	±	207Pb*	±	206Pb*	±	Best age	±	Conc
	(ppm)	204Pb		207Pb*	(%)	235U*	(%)	238U	(%)	corr.	238U*	(Ma)	235U	(Ma)	207Pb*	(Ma)	(Ma)	(Ma)	(%)
He7-JH16p42-May7-RUN2-Spot 193	401.695	7225.45	2.51454	20.7614	1.45202	0.11628	2.9184	0.0175165	2.53154	0.867442	111.941	2.80938	111.694	3.08679	107.472	34.3098	111.941	2.80938	NA
He7-JH16P42-Spot 74	2164.14	30495.2	27.4762	20.513	1.57103	0.12662	3.29184	0.0188461	2.89276	0.878767	120.359	3.4494	121.056	3.75662	135.803	36.9188	120.359	3.4494	NA
He7-JH16p42-May7-RUN2-Spot 146	470.282	15843.7	1.87361	19.9166	1.39291	0.189117	3.26501	0.0273296	2.95298	0.904432	173.813	5.06409	175.876	5.27259	204.724	32.3309	173.813	5.06409	NA
He7-JH16p42-May7-RUN2-Spot 203	633.137	18131.1	1.95444	19.7991	1.29464	0.190472	3.15659	0.0273631	2.87888	0.912023	174.024	4.94292	177.032	5.12819	218.431	29.9873	174.024	4.94292	NA
He7-JH16p42-May7-RUN2-Spot 169	174.718	1289.66	1.21347	24.5961	4.34424	0.154682	5.10571	0.0276053	2.68252	0.525395	175.543	4.64544	146.037	6.94495	NA	NA	175.543	4.64544	NA
He7-JH16p42-May7-RUN2-Spot 159	958.465	37181.7	3.50499	20.1381	1.19696	0.189394	3.37997	0.0276741	3.16094	0.935195	175.975	5.48721	176.112	5.46498	178.955	27.8908	175.975	5.48721	NA
He7-JH16p42-May7-RUN2-Spot 150	221.183	4428.18	0.852882	20.1351	3.68658	0.201153	4.92722	0.0293878	3.26904	0.663465	186.715	6.01626	186.101	8.37857	179.304	85.9653	186.715	6.01626	NA
He7-JH16P42-Spot 30	1348.8	88286.1	2.6002	19.6675	1.1599	0.249943	2.66214	0.0356679	2.39616	0.90009	225.924	5.31975	226.53	5.40524	233.848	26.789	225.924	5.31975	NA
He7-JH16P42-Spot 82	224.835	19294.7	0.748317	19.0982	1.67317	0.282012	3.58547	0.0390795	3.17113	0.88444	247.124	7.68834	252.252	8.00866	301.221	38.1652	247.124	7.68834	NA
He7-JH16P42-Spot 61	892.087	26865.1	4.46547	18.3069	1.75559	0.294797	4.55103	0.0391585	4.19878	0.922601	247.615	10.1997	262.328	10.5215	396.847	39.3604	247.615	10.1997	NA
He7-JH16P42-Spot 40	243.858	10279.4	1.91637	19.1422	1.64564	0.293048	3.67586	0.0407023	3.28692	0.89419	257.185	8.28705	260.956	8.4591	295.937	37.553	257.185	8.28705	NA
He7-JH16p42-May7-RUN2-Spot 211	985.337	34840.3	1.91095	19.3257	1.21334	0.300787	3.09165	0.0421777	2.84361	0.919771	266.317	7.41873	267.015	7.25907	274.111	27.8115	266.317	7.41873	NA
He7-JH16P42-Spot 107	480.051	17029.8	1.32908	19.2845	1.32638	0.328179	3.13423	0.0459205	2.83974	0.906041	289.427	8.0372	288.175	7.86364	279.052	30.3507	289.427	8.0372	NA
He7-JH16p42-May7-RUN2-Spot 223	104.937	15154.3	1.10845	18.4339	1.62523	0.362735	3.73961	0.0485171	3.36798	0.900625	305.411	10.0463	314.255	10.1076	381.334	36.5315	305.411	10.0463	NA
He7-JH16P42-Spot 36	316.225	7697.73	5.66663	18.7368	1.52901	0.406799	3.4028	0.0553049	3.03993	0.893361	347.009	10.2699	346.567	9.99144	344.616	34.5823	347.009	10.2699	NA
He7-JH16p42-May7-RUN2-Spot 274	339.451	14001.8	0.637989	18.5175	1.18898	0.466963	2.74449	0.0627411	2.47357	0.901287	392.274	9.41386	389.089	8.87087	371.155	26.7761	392.274	9.41386	NA
He7-JH16P42-Spot 92	367.845	37254.4	1.97285	17.9356	1.0829	0.535544	2.79399	0.0696945	2.5756	0.921835	434.315	10.8177	435.483	9.89468	442.609	24.0849	434.315	10.8177	98.1261
He7-JH16p42-May7-RUN2-Spot 220	414.776	82717.1	3.06352	17.819	1.22183	0.541355	2.71753	0.0699928	2.42737	0.893226	436.112	10.2359	439.318	9.69164	457.094	27.1275	436.112	10.2359	95.4097
He7-JH16P42-Spot 83	205.716	258190	1.95693	17.1525	1.29777	0.575896	3.19212	0.0716735	2.91641	0.913627	446.23	12.5737	461.82	11.8453	541.054	28.3899	446.23	12.5737	82.4742
He7-JH16P42-Spot 78	410.501	48179	5.39681	17.6168	1.41869	0.563829	2.68956	0.0720712	2.28497	0.849568	448.622	9.90232	454.016	9.84654	482.4	31.337	448.622	9.90232	92.998
He7-JH16p42-May7-RUN2-Spot 295	60.625	1366.98	2.80991	16.8634	3.51168	0.625012	4.3025	0.0764753	2.48588	0.577777	475.05	11.3846	492.984	16.8044	578.149	76.3111	475.05	11.3846	82.1674
He7-JH16P42-Spot 105	237.539	28669.4	0.364918	16.9008	1.17676	0.657299	2.99516	0.0806045	2.75431	0.919587	499.73	13.2442	512.961	12.0624	573.327	25.6077	499.73	13.2442	87.1632
He7-JH16p42-May7-RUN2-Spot 182	63.3247	12437.1	0.398293	16.7817	1.83822	0.661967	3.50681	0.0806047	2.98641	0.851604	499.731	14.3603	515.817	14.1835	588.666	39.8569	499.731	14.3603	84.892
He7-JH16p42-May7-RUN2-Spot 290	283.988	11564.7	1.28899	17.4817	1.51249	0.635706	3.70866	0.080636	3.38622	0.913059	499.918	16.2886	499.644	14.6362	499.329	33.3183	499.918	16.2886	100.118
He7-JH16P42-Spot 51	223.809	7871.63	0.659685	17.634	1.45137	0.634661	3.01751	0.0812048	2.64555	0.876731	503.31	12.8088	498.995	11.8963	480.193	32.0829	503.31	12.8088	104.814
He7-JH16P42-Spot 10	677.425	52726.7	0.99166	17.2109	1.42462	0.65442	3.25592	0.0817237	2.92771	0.899196	506.403	14.2586	511.195	13.0779	533.635	31.1942	506.403	14.2586	94.8968
He7-JH16p42-May7-RUN2-Spot 116	229.512	38167.3	0.573519	17.3324	1.30872	0.651205	3.04999	0.0818961	2.75494	0.903262	507.431	13.4434	509.22	12.2142	518.199	28.7102	507.431	13.4434	97.922
He7-JH16p42-May7-RUN2-Spot 217	178.056	57607.8	0.702144	16.9662	1.216	0.667822	2.35915	0.0822117	2.02162	0.856926	509.311	9.90009	519.387	9.59201	564.883	26.4733	509.311	9.90009	90.1622
He7-JH16p42-May7-RUN2-Spot 114	1161.88	320577	6.35044	17.0674	1.09481	0.682793	3.49095	0.0845558	3.31484	0.949551	523.259	16.6599	528.461	14.3834	551.922	23.8755	523.259	16.6599	94.8067
He7-JH16p42-May7-RUN2-Spot 120	219.076	27619.5	0.931954	17.3507	1.31658	0.673805	3.16098	0.0848281	2.87374	0.90913	524.877	14.4859	523.023	12.9212	515.872	28.9279	524.877	14.4859	101.746
He7-JH16P42-Spot 60	93.5097	3974.69	1.80652	17.2405	2.1921	0.679914	3.63257	0.0850535	2.8966	0.797396	526.217	14.6369	526.722	14.9294	529.891	48.0246	526.217	14.6369	99.3065
He7-JH16p42-May7-RUN2-Spot 313	737.931	115242	2.19787	17.3528	1.23145	0.677625	2.75397	0.0853191	2.46331	0.894457	527.794	12.4832	525.338	11.2954	515.611	27.0524	527.794	12.4832	102.363
He7-JH16P42-Spot 95	341.166	15662.5	0.664744	17.0557	1.17504	0.690211	2.67278	0.085416	2.40063	0.898178	528.37	12.1783	532.927	11.0828	553.442	25.6325	528.37	12.1783	95.4697
He7-JH16p42-May7-RUN2-Spot 125	715.544	71480.8	2.21191	17.1497	1.33296	0.688367	2.92529	0.0856573	2.60395	0.89015	529.802	13.2441	531.819	12.1108	541.44	29.1446	529.802	13.2441	97.8507
He7-JH16p42-May7-RUN2-Spot 245	875.766	36354.5	5.27046	17.2555	1.11199	0.687569	2.60377	0.0860859	2.35438	0.90422	532.347	12.03	531.339	10.7722	527.987	24.3881	532.347	12.03	100.826
He7-JH16p42-May7-RUN2-Spot 305	285.252	48212.3	0.693118	17.1594	1.02264	0.692142	2.41937	0.0861756	2.19262	0.906275	532.88	11.2141	534.086	10.0486	540.218	22.3665	532.88	11.2141	98.6416
He7-JH16P42-Spot 87	335.994	25495.4	1.17456	17.1103	1.06297	0.698266	2.81966	0.0866896	2.61162	0.926219	535.929	13.4305	537.755	11.7723	546.434	23.2448	535.929	13.4305	98.0776
He7-JH16P42-Spot 97	1796.17	738205	145.486	16.9387	1.29733	0.709273	3.22003	0.0871731	2.94712	0.915246	538.797	15.2335	544.315	13.568	568.455	28.2173	538.797	15.2335	94.7826
He7-JH16p42-May7-RUN2-Spot 227	203.481	23628.5	152.789	16.7883	1.32425	0.72085	2.83515	0.087809	2.50688	0.884214	542.566	13.0449	551.169	12.0595	587.8	28.7103	542.566	13.0449	92.3047
He7-JH16p42-May7-RUN2-Spot 161	964.652	39176	8.14026	16.9609	1.3145	0.723325	3.33946	0.0890162	3.06987	0.919271	549.716	16.1761	552.628	14.2331	565.573	28.6258	549.716	16.1761	97.1964
He7-JH16P42-Spot 25	234.395	38479.8	2.27465	17.0236	1.40256	0.721776	3.08121	0.0891542	2.74348	0.89039	550.533	14.4768	551.715	13.116	557.568	30.5759	550.533	14.4768	98.7382
He7-JH16p42-May7-RUN2-Spot 168	191.781	33442.6	0.381517	16.9474	1.03744	0.725552	3.05528	0.0892194	2.87375	0.940585	550.919	15.1744	553.939	13.045	567.345	22.6029	550.919	15.1744	97.1047
He7-JH16P42-Spot 5	291.059	14915	1.05378	17.2371	1.32073	0.716599	2.76096	0.0896249	2.42457	0.878164	553.319	12.856	548.657	11.7035	530.324	28.933	553.319	12.856	104.336
He7-JH16P42-Spot 80	105.05	10372.8	0.941029	16.0222	1.88524	0.771062	3.45762	0.0896396	2.89845	0.838278	553.405	15.371	580.372	15.2861	688.279	40.2269	553.405	15.371	80.4042
He7-JH16P42-Spot 31	1188.58	37806.4	3.46054	17.0196	1.32796	0.727382	3.204	0.0898253	2.91584	0.910064	554.504	15.4926	555.016	13.7001	558.071	28.9477	554.504	15.4926	99.3609
He7-JH16p42-May7-RUN2-Spot 285	31.8108	5612.52	0.76978	16.2602	1.6733	0.762633	3.46419	0.0899764	3.03327	0.875605	555.398	16.1414	575.528	15.2201	656.748	35.8902	555.398	16.1414	84.5679
He7-JH16p42-May7-RUN2-Spot 195	96.4848	20419.6	1.12976	16.5777	1.7266	0.748507	2.82162	0.0900342	2.23168	0.790922	555.74	11.8828	567.358	12.2653	615.127	37.308	555.74	11.8828	90.3455
He7-JH16P42-Spot 84	924.154	85170.5	4.23852	17.2363	1.18489	0.721497	2.87121	0.0902333	2.61531	0.910876	556.917	13.9537	551.551	12.2192	530.428	25.9768	556.917	13.9537	104.994
He7-JH16p42-May7-RUN2-Spot 171	103.934	6687.93	2.01413	16.8596	1.34555	0.737819	3.12871	0.0902579	2.82459	0.902798	557.062	15.0741	561.132	13.4886	578.593	29.2387	557.062	15.0741	96.2787
He7-JH16p42-May7-RUN2-Spot 229	432.674	43914	3.60052	17.1022	1.18514	0.742958	3.29402	0.0921943	3.07344	0.933036	568.501	16.7243	564.13	14.2581	547.473	25.8948	568.501	16.7243	103.841
He7-JH16p42-May7-RUN2-Spot 157	388.741	14176.6	0.92546	16.0247	1.59424	0.793249	3.36819	0.0922332	2.967	0.880888	568.731	16.1513	593.013	15.1296	687.966	34.0053	568.731	16.1513	82.6685
He7-JH16P42-Spot 110	399.889	18204.9	0.808859	17.0257	1.21618	0.752426	2.87283	0.0929514	2.6027	0.905971	572.969	14.2692	569.631	12.5252	557.3	26.5013	572.969	14.2692	102.812
He7-JH16p42-May7-RUN2-Spot 273	399.557	38882.7	1.45014	17.0614	1.20486	0.756875	3.32991	0.0936971	3.10429	0.932245	577.365	17.144	572.205	14.5672	552.71	26.2955	577.365	17.144	104.461
He7-JH16p42-May7-RUN2-Spot 138	129.59	15061.9	1.09729	16.9171	1.43864	0.770753	2.78161	0.0946082	2.38069	0.855866	582.733	13.2645	580.195	12.2943	571.207	31.2799	582.733	13.2645	102.018
He7-JH16p42-May7-RUN2-Spot 162	140.069	13517.6	1.2004	16.9218	1.45226	0.771671	2.65155	0.094747	2.21848	0.836673	583.55	12.3773	580.721	11.7273	570.602	31.6003	583.55	12.3773	102.269
He7-JH16p42-May7-RUN2-Spot 163	43.7913	7422.09	167.851	16.4822	1.48657	0.792989	2.90196	0.0948354	2.49229	0.858828	584.071	13.9168	592.866	13.0327	627.585	32.0405	584.071	13.9168	93.0665
He7-JH16p42-May7-RUN2-Spot 176	36.7464	11517.5	1.60422	15.7371	1.32993	0.831391	3.20807	0.094933	2.91942	0.910023	584.646	16.3172	614.383	14.7886	726.474	28.1992	584.646	16.3172	80.4772
He7-JH16p42-May7-RUN2-Spot 156	76.4254	48817.3	0.57992	16.15	1.54006	0.811111	2.968	0.0950472	2.53717	0.854842	585.318	14.1963	603.077	13.4975	671.315	32.9319	585.318	14.1963	87.1899
He7-JH16p42-May7-RUN2-Spot 238	69.672	30097.6	0.725624	16.2021	1.51269	0.808715	3.00109	0.0950725	2.59197	0.863676	585.467	14.5064	601.733	13.6257	664.453	32.4036	585.467	14.5064	88.1125
He7-JH16p42-May7-RUN2-Spot 139	323.755	22341.2	2.59781	16.5644	1.0447	0.799927	2.5751	0.0961422	2.35366	0.914009	591.761	13.3079	596.787	11.6208	616.857	22.5552	591.761	13.3079	95.9316
He7-JH16p42-May7-RUN2-Spot 196	336.856	58654.2	25.9177	16.7942	1.29235	0.790152	3.12035	0.096285	2.84015	0.9102	592.601	16.0803	591.258	13.9856	587.055	28.0216	592.601	16.0803	100.945
He7-JH16p42-May7-RUN2-Spot 200	57.0574	15172	0.511297	16.5204	1.68826	0.80412	3.61501	0.0963893	3.19657	0.88425	593.214	18.1162	599.15	16.3618	622.598	36.3957	593.214	18.1162	95.2805
He7-JH16P42-Spot 15	85.7757	4358.63	1.61591	16.2913	1.56396	0.815449	2.94751	0.0963916	2.49836	0.847619	593.227	14.1595	605.506	13.4438	652.683	33.5877	593.227	14.1595	90.8906
He7-JH16p42-May7-RUN2-Spot 247	536.776	121804	18.651	16.7539	1.06498	0.793479	3.22333	0.0964583	3.04232	0.943842	593.619	17.2533	593.144	14.4812	592.263	23.0681	593.619	17.2533	100.229
He7-JH16P42-Spot 77	1430.27	78129.5	1.29662	16.6395	1.27855	0.804041	2.95836	0.0970749	2.66781	0.901786	597.244	15.2175	599.106	13.3887	607.081	27.6616	597.244	15.2175	98.3796
He7-JH16p42-May7-RUN2-Spot 250	275.676	39374.3	2.80984	16.5866	1.27177	0.806787	2.55555	0.0970965	2.21663	0.867378	597.371	12.6465	600.65	11.5874	613.968	27.4738	597.371	12.6465	97.2967
He7-JH16p42-May7-RUN2-Spot 123	123.94	20307.8	2.20978	16.3412	0.861518	0.826488	2.91054	0.0979957	2.78012	0.955188	602.652	15.9952	611.661	13.3736	646.121	18.5314	602.652	15.9952	93.2723
He7-JH16p42-May7-RUN2-Spot 276	194.361	12921.7	1.8725	16.1853	1.1014	0.838802	2.78069	0.098507	2.55326	0.918213	605.653	14.7597	618.484	12.8804	666.64	23.5633	605.653	14.7597	90.8516
He7-JH16p42-May7-RUN2-Spot 205	546.643	68685	7.12021	16.3412	1.49904	0.833149	3.00612	0.0987858	2.60569	0.866797	607.29	15.1016	615.358	13.8736	646.113	32.2084	607.29	15.1016	93.9912
He7-JH16p42-May7-RUN2-Spot 307	216.216	24880.7	1.65053	16.3634	1.36579	0.843192	2.52235	0.100112	2.12058	0.840716	615.066	12.4401	620.905	11.7168	643.202	29.3731	615.066	12.4401	95.6257
He7-JH16p42-May7-RUN2-Spot 128	107.408	8604.87	3.06864	16.3902	1.40296	0.850683	2.90146	0.101167	2.53972	0.875324	621.244	15.0415	625.024	13.5428	639.687	30.191	621.244	15.0415	97.1168
He7-JH16p42-May7-RUN2-Spot 278	431.78	38410.8	3.67425	16.3476	1.12211	0.873476	3.26089	0.103608	3.06174	0.938929	635.516	18.5296	637.453	15.4384	645.28	24.1332	635.516	18.5296	98.4868
He7-JH16p42-May7-RUN2-Spot 234	238.458	22090	2.43409	16.5414	1.33058	0.868594	3.70864	0.10425	3.46173	0.933423	639.27	21.068	634.804	17.5061	619.85	28.7253	639.27	21.068	103.133
He7-JH16P42-Spot 50	86.4653	53552.6	2.39773	15.7693	1.32749	0.915693	3.08015	0.104773	2.7794	0.90236	642.321	16.9921	660.08	14.9505	722.137	28.1477	642.321	16.9921	88.9473
He7-JH16P42-Spot 13	368.844	25735.1	3.78743	15.9396	1.34559	0.910801	2.96825	0.105339	2.64573	0.891344	645.62	16.2539	657.483	14.3671	699.34	28.6643	645.62	16.2539	92.3185
He7-JH16p42-May7-RUN2-Spot 210	521.454	235269	1.5272	15.6151	1.3575	0.969015	2.99171	0.10979	2.66599	0.891127	671.529	17.002	687.956	14.9507	742.949	28.6969	671.529	17.002	90.387
He7-JH16P42-Spot 99	276.167	29564.8	12.1628	16.0764	1.46401	0.950395	2.98684	0.110862	2.60343	0.871636	677.751	16.7489	678.309	14.7793	681.069	31.264	677.751	16.7489	99.5127
He7-JH16p42-May7-RUN2-Spot 277	403.389	37301.4	1.06439	16.0795	1.3604	0.968876	3.08392	0.113039	2.76765	0.897445	690.375	18.1197	687.884	15.4105	680.658	29.0633	690.375	18.1197	101.428
He7-JH16p42-May7-RUN2-Spot 204	246	28241.5	2.34393	15.7369	1.03504	1.00542	2.83675	0.114803	2.64119	0.93106	700.584	17.5338	706.558	14.4419	726.495	21.9262	700.584	17.5338	96.4335
He7-JH16P42-Spot 63	189.732	8947.69	3.36813	15.8773	1.28486	1.02307	3.24678	0.117861	2.98173	0.918365	718.242	20.2661	715.457	16.6731	707.664	27.3478	718.242	20.2661	101.495
He7-JH16P42-Spot 75	98.042	8002.85	7.08955	15.4313	1.57543	1.05793	3.92535	0.118453	3.59533	0.915925	721.656	24.5464	732.804	20.4925	767.941	33.1614	721.656	24.5464	93.9729
He7-JH16p42-May7-RUN2-Spot 246	71.585	22901.4	0.756493	15.043	1.34759	1.08668	2.64825	0.118611	2.27974	0.860849	722.564	15.583	746.89	14.0043	821.42	28.1609	722.564	15.583	87.9652
He7-JH16P42-Spot 33	144.108	32185.6	1.11391	15.4621	1.24995	1.07916	2.8827	0.121072	2.59761	0.901103	736.73	18.0843	743.224	15.1936	763.733	26.3237	736.73	18.0843	96.4643
He7-JH16p42-May7-RUN2-Spot 219	321.555	30694.9	7.76367	14.9249	1.29291	1.11913	2.5033	0.121193	2.14358	0.8563	737.429	14.9368	762.558	13.4243	837.823	26.9292	737.429	14.9368	88.0173
He7-JH16P42-Spot 96	135.161	11620.1	2.9611	15.2241	1.36981	1.10862	3.14222	0.122462	2.82793	0.899977	744.719	19.8892	757.509	16.7761	796.344	28.733	744.719	19.8892	93.5172
He7-JH16p42-May7-RUN2-Spot 188	414.866	80024.3	2.94778	15.6557	1.20589	1.07816	3.06714	0.122473	2.82014	0.919469	744.784	19.8361	742.733	16.1586	737.497	25.5194	744.784	19.8361	100.988
He7-JH16p42-May7-RUN2-Spot 175	114.606	70143.1	1.04215	15.539	1.30607	1.12715	3.24811	0.127084	2.97396	0.915595	771.209	21.6167	766.392	17.4778	753.273	27.5744	771.209	21.6167	102.381
He7-JH16p42-May7-RUN2-Spot 226	258.846	71523.9	1.55324	15.3073	1.26428	1.14524	3.74782	0.127199	3.52813	0.941383	771.868	25.6655	774.993	20.3183	784.903	26.576	771.868	25.6655	98.3392
He7-JH16p42-May7-RUN2-Spot 255	68.9977	7109.46	0.631626	15.4018	1.41166	1.14575	3.2162	0.128041	2.88984	0.898525	776.68	21.1455	775.235	17.4392	771.97	29.7132	776.68	21.1455	100.61
He7-JH16P42-Spot 62	90.2086	23413	1.56845	14.6369	1.4255	1.21213	3.30204	0.128732	2.97849	0.902016	780.625	21.8983	806.168	18.3737	878.287	29.5016	780.625	21.8983	88.8804
He7-JH16P42-Spot 59	648.857	59296	33.133	15.2007	1.17461	1.16965	3.72519	0.129005	3.53516	0.948987	782.188	26.04	786.48	20.394	799.564	24.6341	782.188	26.04	97.8268
He7-JH16p42-May7-RUN2-Spot 147	191.804	32766.1	1.10933	15.1375	0.992322	1.17701	3.46677	0.129278	3.32171	0.958158	783.745	24.5135	789.921	19.0338	808.285	20.7644	783.745	24.5135	96.9639
He7-JH16p42-May7-RUN2-Spot 133	49.6647	9331.93	0.921872	14.642	1.36018	1.22032	3.68028	0.129647	3.4197	0.929196	785.849	25.3004	809.92	20.5413	877.561	28.1335	785.849	25.3004	89.5492
He7-JH16p42-May7-RUN2-Spot 154	253.634	116044	1.66169	14.4825	1.38591	1.24543	3.59778	0.130874	3.32013	0.922827	792.847	24.7692	821.341	20.2648	900.179	28.5858	792.847	24.7692	88.0766
He7-JH16P42-Spot 3	430.845	118389	19.0608	14.0896	1.47908	1.29957	3.60713	0.132858	3.28994	0.912065	804.147	24.8725	845.531	20.7016	956.649	30.2344	804.147	24.8725	84.0587
He7-JH16p42-May7-RUN2-Spot 268	85.2825	77338.4	1.41261	14.2255	1.40486	1.28871	3.07343	0.133018	2.73356	0.889416	805.058	20.6881	840.724	17.5736	937.031	28.8281	805.058	20.6881	85.9158
He7-JH16P42-Spot 21	63.0184	9409.94	1.86408	14.4592	1.64796	1.27791	2.66858	0.13407	2.09894	0.786538	811.042	15.996	835.923	15.2022	903.502	33.9712	811.042	15.996	89.7665
He7-JH16P42-Spot 57	632.198	247491	2.58241	14.6164	1.31555	1.28564	2.907	0.136348	2.59229	0.891741	823.976	20.0512	839.364	16.6045	881.176	27.1954	823.976	20.0512	93.5087
He7-JH16p42-May7-RUN2-Spot 270	42.8554	3796.19	0.973738	14.3866	3.17108	1.30924	4.17966	0.136667	2.72282	0.651446	825.787	21.1042	849.792	24.0659	913.873	65.2753	825.787	21.1042	90.3612
He7-JH16P42-Spot 27	118.633	19412.5	2.01667	14.9108	1.28959	1.26428	2.57641	0.136784	2.23043	0.865714	826.45	17.3008	829.83	14.6079	839.783	26.8511	826.45	17.3008	98.4123
He7-JH16p42-May7-RUN2-Spot 280	290.839	24913.5	2.62463	15.0372	1.59524	1.26091	3.33022	0.137575	2.92328	0.877804	830.936	22.7903	828.319	18.8606	822.229	33.3204	830.936	22.7903	101.059
He7-JH16P42-Spot 56	189.714	38221.1	2.55572	14.9235	1.42676	1.27268	3.6128	0.137809	3.31914	0.918716	832.26	25.9152	833.588	20.5454	838.036	29.7325	832.26	25.9152	99.3108
He7-JH16p42-May7-RUN2-Spot 242	107.973	27045.6	1.58354	14.7	1.34232	1.29487	2.76982	0.138113	2.42282	0.874722	833.981	18.9535	843.456	15.8703	869.39	27.7983	833.981	18.9535	95.9271
He7-JH16p42-May7-RUN2-Spot 189	50.6478	8376.95	0.864892	14.638	1.44746	1.30238	2.87217	0.138327	2.48077	0.863726	835.196	19.4333	846.773	16.4983	878.119	29.9492	835.196	19.4333	95.112
He7-JH16P42-Spot 6	392.333	39960.1	2.0622	15.0977	1.2799	1.26666	2.58435	0.138758	2.24515	0.868751	837.637	17.6357	830.894	14.6651	813.834	26.7594	837.637	17.6357	102.925
He7-JH16p42-May7-RUN2-Spot 209	346.018	53488.2	2.13137	14.1598	1.13836	1.35076	3.16295	0.138779	2.95099	0.932989	837.752	23.1831	867.886	18.4561	946.508	23.3015	837.752	23.1831	88.5098
He7-JH16p42-May7-RUN2-Spot 256	53.7174	11119.5	1.55981	14.3155	1.58974	1.33904	2.87012	0.139088	2.38963	0.832588	839.5	18.8096	862.814	16.685	924.101	32.6472	839.5	18.8096	90.8451
He7-JH16p42-May7-RUN2-Spot 201	102.901	13206.7	0.793606	14.5625	1.32705	1.32006	2.76904	0.139482	2.43033	0.877681	841.732	19.1777	854.541	15.9989	888.843	27.4372	841.732	19.1777	94.6997
He7-JH16p42-May7-RUN2-Spot 186	20.6869	8123.73	1.38711	14.2997	2.05714	1.34681	3.48535	0.13974	2.81352	0.807239	843.194	22.2375	866.181	20.3125	926.364	42.238	843.194	22.2375	91.0218
He7-JH16p42-May7-RUN2-Spot 310	184.077	34644.7	2.05709	14.6548	1.24733	1.31808	2.38502	0.140155	2.03286	0.852342	845.54	16.1091	853.674	13.7709	875.788	25.8044	845.54	16.1091	96.5462
He7-JH16P42-Spot 104	236.05	47205	2.95156	15.0051	1.42382	1.29126	3.9817	0.140585	3.71843	0.933878	847.971	29.5456	841.856	22.7883	826.675	29.7084	847.971	29.5456	102.576
He7-JH16p42-May7-RUN2-Spot 113	80.4159	17810.8	2.23014	14.683	1.41936	1.32603	3.53936	0.141272	3.24229	0.916068	851.85	25.8725	857.149	20.4904	871.77	29.3851	851.85	25.8725	97.715
He7-JH16P42-Spot 22	127.462	18029.1	1.19486	14.668	1.17252	1.33659	2.99369	0.142252	2.75452	0.920108	857.383	22.1137	861.748	17.3898	873.913	24.2628	857.383	22.1137	98.1085
He7-JH16p42-May7-RUN2-Spot 264	144.007	24196.8	1.0116	14.7742	1.13224	1.32936	2.5731	0.142507	2.3106	0.897983	858.821	18.579	858.602	14.9116	858.92	23.5029	858.821	18.579	99.9885
He7-JH16p42-May7-RUN2-Spot 272	56.2129	4744.41	1.47932	14.6417	1.37473	1.35397	3.14485	0.143843	2.82847	0.899396	866.356	22.9294	869.272	18.369	877.592	28.4537	866.356	22.9294	98.7197
He7-JH16p42-May7-RUN2-Spot 292	55.193	4423.41	1.06856	14.7387	1.28644	1.35996	2.48461	0.145436	2.12564	0.855524	875.326	17.3984	871.851	14.5391	863.957	26.6925	875.326	17.3984	101.316
He7-JH16P42-Spot 109	175.662	42200.9	2.53606	14.4635	1.33836	1.40924	2.73155	0.147893	2.38122	0.871744	889.142	19.7772	892.84	16.2249	902.885	27.5718	889.142	19.7772	98.4779
He7-JH16P42-Spot 1	287.326	111430	2.18389	14.3419	1.23411	1.47427	3.48217	0.153417	3.25615	0.935091	920.087	27.9197	919.881	21.0704	920.302	25.3632	920.302	25.3632	99.9767
He7-JH16p42-May7-RUN2-Spot 127	229.288	130255	2.00096	14.2683	0.9116	1.54555	3.59774	0.160009	3.48033	0.967366	956.826	30.9475	948.719	22.1835	930.831	18.7275	930.831	18.7275	102.793
He7-JH16p42-May7-RUN2-Spot 155	176.239	32227.6	2.83432	14.2583	1.25843	1.5266	3.00706	0.157935	2.73107	0.90822	945.294	24.0131	941.132	18.4505	932.32	25.8242	932.32	25.8242	101.392
He7-JH16p42-May7-RUN2-Spot 115	25.7281	38744	0.914573	14.2106	1.71292	1.41914	3.81491	0.146328	3.40873	0.893528	880.345	28.0499	897.003	22.7275	939.149	35.1153	939.149	35.1153	93.7386
He7-JH16P42-Spot 39	295.092	22064.2	1.39659	14.1801	1.09698	1.45461	3.30104	0.149663	3.11344	0.943169	899.071	26.1278	911.783	19.8655	943.565	22.4731	943.565	22.4731	95.2845
He7-JH16P42-Spot 100	822.814	91309.5	2.04569	14.1395	1.13018	1.54259	2.82032	0.15826	2.58397	0.916197	947.097	22.7599	947.537	17.3758	949.467	23.1375	949.467	23.1375	99.7504
He7-JH16P42-Spot 19	361.036	39377	1.4891	14.0814	1.46242	1.59361	3.28706	0.162823	2.94383	0.89558	972.447	26.5727	967.712	20.5104	957.844	29.8746	957.844	29.8746	101.525
He7-JH16p42-May7-RUN2-Spot 304	93.9798	28470.4	2.14182	14.08	1.66636	1.39661	3.60756	0.142682	3.19964	0.886928	859.808	25.7552	887.502	21.3494	958.043	34.0417	958.043	34.0417	89.7463
He7-JH16p42-May7-RUN2-Spot 257	72.9124	39258.1	4.78087	14.0784	1.64691	1.53999	2.82041	0.157312	2.28963	0.811808	941.819	20.063	946.5	17.3648	958.276	33.662	958.276	33.662	98.2827
He7-JH16p42-May7-RUN2-Spot 297	212.085	77070.6	1.59175	14.0746	1.38401	1.5795	3.01719	0.161303	2.68103	0.888587	964.011	24.0059	962.171	18.7614	958.84	28.2914	958.84	28.2914	100.539
He7-JH16p42-May7-RUN2-Spot 289	263.236	115861	3.93146	14.0396	1.15597	1.59476	3.26334	0.162457	3.05174	0.935159	970.416	27.4934	968.161	20.368	963.953	23.5926	963.953	23.5926	100.67
He7-JH16p42-May7-RUN2-Spot 296	187.308	1.59427e+06	1.22704	14.033	1.50888	1.54767	2.7218	0.157585	2.26528	0.832271	943.343	19.8794	949.565	16.7904	964.922	30.8278	964.922	30.8278	97.7636
He7-JH16p42-May7-RUN2-Spot 216	310.258	206606	5.20506	13.995	1.12607	1.54154	2.35613	0.156536	2.06962	0.878398	937.5	18.0579	947.121	14.5117	970.457	22.9886	970.457	22.9886	96.6039
He7-JH16p42-May7-RUN2-Spot 309	74.3356	55198.8	1.39868	13.9631	1.40258	1.44711	2.71557	0.146613	2.32532	0.85629	881.948	19.1671	908.673	16.3071	975.082	28.5795	975.082	28.5795	90.4486
He7-JH16P42-Spot 42	429.439	24293.7	2.97928	13.941	1.44469	1.59574	2.98998	0.161415	2.61779	0.875523	964.637	23.4537	968.546	18.6658	978.317	29.4187	978.317	29.4187	98.6017
He7-JH16P42-Spot 41	227.421	12481.6	2.45663	13.9401	1.25826	1.63557	3.44147	0.165434	3.20321	0.930766	986.902	29.3118	984.008	21.6888	978.433	25.6272	978.433	25.6272	100.866
He7-JH16p42-May7-RUN2-Spot 263	139.76	25691.9	2.56126	13.9027	1.09704	1.67382	3.49741	0.168848	3.3209	0.949532	1005.76	30.9254	998.638	22.2342	983.929	22.3153	983.929	22.3153	102.219
He7-JH16p42-May7-RUN2-Spot 235	89.3885	134012	3.17253	13.9003	1.51143	1.55053	3.24428	0.156384	2.8707	0.88485	936.652	25.0265	950.705	20.0288	984.246	30.7581	984.246	30.7581	95.1645
He7-JH16p42-May7-RUN2-Spot 167	323.175	81395.8	3.53351	13.8817	1.32369	1.70667	2.52084	0.171901	2.14534	0.851043	1022.58	20.2864	1011.04	16.1408	987.007	26.9172	987.007	26.9172	103.604
He7-JH16P42-Spot 43	188.1	18570.8	1.61033	13.8813	1.35849	1.64839	3.26484	0.166027	2.96878	0.909319	990.182	27.2501	988.934	20.6362	987.047	27.6447	987.047	27.6447	100.318
He7-JH16P42-Spot 90	188.775	24989.6	0.665708	13.8655	1.15831	1.61121	2.90109	0.162097	2.65982	0.916835	968.418	23.9168	974.577	18.178	989.354	23.5432	989.354	23.5432	97.8838
He7-JH16p42-May7-RUN2-Spot 221	196.704	42887.7	1.55447	13.8189	1.40684	1.55131	2.9347	0.155546	2.57551	0.877606	931.977	22.3488	951.014	18.1207	996.208	28.5738	996.208	28.5738	93.5524
He7-JH16P42-Spot 108	176.723	10654.7	0.692432	13.8143	1.71988	1.64734	3.85189	0.16512	3.4466	0.894782	985.168	31.4877	988.532	24.3422	996.872	34.928	996.872	34.928	98.8259
He7-JH16P42-Spot 88	271.627	35547	3.68125	13.8056	1.07542	1.64184	2.93899	0.164465	2.73517	0.930648	981.543	24.903	986.42	18.5482	998.151	21.8324	998.151	21.8324	98.336
He7-JH16P42-Spot 44	250.156	18508.7	4.61026	13.7895	1.36752	1.60305	3.09919	0.160392	2.78116	0.897384	958.954	24.7813	971.4	19.3819	1000.52	27.7526	1000.52	27.7526	95.8451
He7-JH16p42-May7-RUN2-Spot 281	926.095	30798.8	21.686	13.7575	1.4681	1.50889	3.63435	0.150621	3.32464	0.914781	904.442	28.0555	933.989	22.1974	1005.23	29.7862	1005.23	29.7862	89.9733
He7-JH16p42-May7-RUN2-Spot 312	338.998	31991.3	3.50965	13.7546	1.07038	1.65788	2.87972	0.165459	2.6734	0.928355	987.042	24.4668	992.567	18.2408	1005.66	21.7114	1005.66	21.7114	98.1486
He7-JH16p42-May7-RUN2-Spot 241	347.682	67909.1	2.39747	13.7499	1.28646	1.64306	2.66437	0.163924	2.33321	0.875709	978.545	21.1832	986.89	16.8194	1006.36	26.1026	1006.36	26.1026	97.2364
He7-JH16P42-Spot 58	434.447	30745.9	1.09452	13.7399	1.3547	1.47147	3.54462	0.146698	3.27553	0.924085	882.429	27.0133	918.733	21.4319	1007.83	27.4799	1007.83	27.4799	87.5574
He7-JH16p42-May7-RUN2-Spot 298	73.9439	17078.5	2.21232	13.735	1.12278	1.56635	2.96512	0.156102	2.74433	0.925535	935.076	23.8873	956.985	18.3778	1008.55	22.7705	1008.55	22.7705	92.7147
He7-JH16p42-May7-RUN2-Spot 177	69.3875	22669.7	1.39393	13.7002	1.41775	1.75541	3.5441	0.174499	3.24817	0.916501	1036.85	31.1101	1029.16	22.9299	1013.7	28.7279	1013.7	28.7279	102.284
He7-JH16p42-May7-RUN2-Spot 192	102.248	102689	2.24209	13.6886	1.40627	1.7018	3.30592	0.169026	2.99191	0.905016	1006.74	27.8868	1009.21	21.1466	1015.42	28.4825	1015.42	28.4825	99.1455
He7-JH16p42-May7-RUN2-Spot 145	301.19	33657.5	2.74009	13.6739	1.19329	1.75253	2.79628	0.173878	2.52888	0.904374	1033.44	24.1474	1028.1	18.0796	1017.59	24.161	1017.59	24.161	101.557
He7-JH16p42-May7-RUN2-Spot 141	259.493	36823.3	2.1316	13.5976	1.20338	1.75492	2.90232	0.173143	2.64109	0.909992	1029.41	25.128	1028.98	18.7747	1028.92	24.3515	1028.92	24.3515	100.047
He7-JH16p42-May7-RUN2-Spot 233	406.718	32730	6.72182	13.549	1.14368	1.6984	3.00204	0.166969	2.77565	0.924589	995.389	25.6013	1007.93	19.1881	1036.15	23.1194	1036.15	23.1194	96.0658
He7-JH16p42-May7-RUN2-Spot 301	100.127	45675.7	1.80831	13.5397	1.27873	1.77952	2.96206	0.174824	2.67182	0.902016	1038.64	25.6305	1038.01	19.2579	1037.54	25.8422	1037.54	25.8422	100.106
He7-JH16P42-Spot 45	130.42	4326.55	1.34151	13.493	1.45256	1.67322	3.38215	0.163813	3.05434	0.903077	977.932	27.7143	998.411	21.4984	1044.52	29.3209	1044.52	29.3209	93.6251
He7-JH16p42-May7-RUN2-Spot 212	36.6096	7811.39	36.5158	13.4862	1.82138	1.57168	3.39691	0.153794	2.86732	0.844099	922.198	24.6382	959.09	21.0826	1045.57	36.7373	1045.57	36.7373	88.2002
He7-JH16p42-May7-RUN2-Spot 288	92.0772	26757.6	2.66631	13.4541	1.38949	1.81729	2.67103	0.177405	2.28117	0.854041	1052.78	22.1574	1051.71	17.4962	1050.37	28.0051	1050.37	28.0051	100.229
He7-JH16P42-Spot 54	772.75	49129.9	10.6109	13.4422	1.26653	1.80481	2.42916	0.176031	2.07285	0.853321	1045.25	20.0013	1047.2	15.8726	1052.16	25.5274	1052.16	25.5274	99.3436
He7-JH16p42-May7-RUN2-Spot 199	243.813	30581.2	9.04391	13.4316	1.06202	1.87297	3.01715	0.182535	2.82405	0.936002	1080.81	28.1013	1071.58	19.9748	1053.74	21.4127	1053.74	21.4127	102.569
He7-JH16P42-Spot 28	79.0343	149321	1.98179	13.4268	1.42392	1.69867	2.79353	0.165489	2.40339	0.860341	987.211	21.9992	1008.03	17.8562	1054.46	28.6816	1054.46	28.6816	93.6223
He7-JH16p42-May7-RUN2-Spot 232	563.639	57975.8	21.6276	13.3684	1.27149	1.84577	3.13357	0.179038	2.86401	0.913978	1061.72	28.0358	1061.92	20.6399	1063.24	25.5895	1063.24	25.5895	99.8564
He7-JH16p42-May7-RUN2-Spot 248	272.946	29059	5.25596	13.3611	1.33736	1.72805	3.22749	0.167528	2.93737	0.91011	998.475	27.1706	1019.03	20.7615	1064.34	26.8983	1064.34	26.8983	93.8118
He7-JH16p42-May7-RUN2-Spot 202	416.938	157997	1.63365	13.3586	1.09888	1.81355	3.17633	0.175784	2.9802	0.93825	1043.9	28.7221	1050.36	20.7918	1064.71	22.1084	1064.71	22.1084	98.0451
He7-JH16p42-May7-RUN2-Spot 118	550.944	44755.6	2.53351	13.3474	1.12318	1.84181	2.91143	0.178374	2.68605	0.92259	1058.08	26.2109	1060.51	19.1618	1066.4	22.584	1066.4	22.584	99.2205
He7-JH16p42-May7-RUN2-Spot 286	359.544	58584	4.21956	13.3418	1.212	1.68771	2.99412	0.163381	2.73785	0.914408	975.538	24.7861	1003.9	19.0926	1067.24	24.3659	1067.24	24.3659	91.4078
He7-JH16P42-Spot 55	622.006	125416	2.92589	13.3276	1.26937	1.84707	3.44598	0.178617	3.20367	0.929682	1059.42	31.2982	1062.38	22.7039	1069.38	25.5305	1069.38	25.5305	99.0682
He7-JH16p42-May7-RUN2-Spot 173	170.244	34555.2	5.4632	13.2948	1.26524	1.92522	3.63068	0.185716	3.40309	0.937314	1098.13	34.3609	1089.88	24.2674	1074.33	25.3968	1074.33	25.3968	102.215
He7-JH16P42-Spot 64	979.213	12520.3	1.59776	13.2188	1.40946	1.58282	2.9176	0.151814	2.55457	0.875571	911.122	21.7053	963.48	18.1568	1085.83	28.2386	1085.83	28.2386	83.9106
He7-JH16p42-May7-RUN2-Spot 283	113.012	16443	1.07035	13.2012	1.09043	1.73496	2.48334	0.166184	2.23113	0.89844	991.051	20.4959	1021.59	15.9971	1088.48	21.833	1088.48	21.833	91.0487
He7-JH16p42-May7-RUN2-Spot 137	326.968	115806	9.13356	13.1971	1.10372	1.94777	3.20502	0.186512	3.00897	0.938833	1102.45	30.4911	1097.68	21.5065	1089.09	22.0975	1089.09	22.0975	101.227
He7-JH16P42-Spot 53	319.083	34079.3	2.50747	13.1764	1.14747	1.81043	2.77422	0.173088	2.52579	0.91045	1029.1	24.0244	1049.23	18.1479	1092.24	22.964	1092.24	22.964	94.2194
He7-JH16p42-May7-RUN2-Spot 197	77.417	1.74413e+06	1.99035	13.1586	1.226	1.7617	2.58245	0.168202	2.27288	0.880124	1002.2	21.0965	1031.47	16.7285	1094.98	24.5463	1094.98	24.5463	91.5267
He7-JH16p42-May7-RUN2-Spot 172	153.319	217017	1.91591	13.1303	1.63098	1.93413	2.64896	0.184267	2.08732	0.787977	1090.24	20.9366	1092.97	17.7319	1099.26	32.6254	1099.26	32.6254	99.1801
He7-JH16p42-May7-RUN2-Spot 122	481.929	82124.9	2.836	13.1294	1.08827	1.94548	2.91551	0.185336	2.70479	0.927723	1096.06	27.2629	1096.89	19.5555	1099.42	21.7769	1099.42	21.7769	99.6944
He7-JH16p42-May7-RUN2-Spot 261	412.065	47459.5	6.18071	13.0313	1.42237	1.9704	2.95186	0.186308	2.58657	0.87625	1101.34	26.1865	1105.44	19.8848	1114.38	28.414	1114.38	28.414	98.8303
He7-JH16p42-May7-RUN2-Spot 126	637.05	129214	1.44161	13.0044	1.3291	2.09585	3.95286	0.19776	3.72271	0.941777	1163.28	39.6234	1147.45	27.1785	1118.54	26.5361	1118.54	26.5361	104
He7-JH16p42-May7-RUN2-Spot 158	576.65	37070.9	1.37561	13.0015	1.18809	1.58546	2.9388	0.149567	2.68794	0.914637	898.536	22.5445	964.515	18.3006	1118.99	23.6887	1118.99	23.6887	80.2992
He7-JH16P42-Spot 66	223.12	71412.3	1.55202	12.9897	1.37334	2.08789	3.06009	0.196786	2.73461	0.893637	1158.03	28.9864	1144.83	21.0122	1120.79	27.3754	1120.79	27.3754	103.323
He7-JH16p42-May7-RUN2-Spot 207	95.4576	1.3362e+06	1.32062	12.9708	1.48897	1.89851	3.01431	0.178677	2.62088	0.86948	1059.74	25.6118	1080.57	20.0499	1123.7	29.6653	1123.7	29.6653	94.3085
He7-JH16p42-May7-RUN2-Spot 198	155.102	32387.8	0.943739	12.9198	1.31592	2.01533	3.18408	0.188925	2.89943	0.910603	1115.55	29.7009	1120.69	21.6118	1131.52	26.1851	1131.52	26.1851	98.5887
He7-JH16p42-May7-RUN2-Spot 112	306.955	30659.7	12.8882	12.8194	1.30085	2.11486	3.26572	0.196714	2.99545	0.91724	1157.65	31.7416	1153.66	22.5176	1147.05	25.8436	1147.05	25.8436	100.923
He7-JH16P42-Spot 72	488.503	81594.1	1.79511	12.796	1.30869	2.06188	3.19908	0.191437	2.91915	0.912497	1129.16	30.2366	1136.24	21.8775	1150.68	25.9962	1150.68	25.9962	98.1298
He7-JH16p42-May7-RUN2-Spot 266	68.8144	15379.9	0.552377	12.6858	1.4207	2.1122	2.90715	0.194419	2.53636	0.872457	1145.27	26.6143	1152.79	20.0365	1167.81	28.1215	1167.81	28.1215	98.07
He7-JH16p42-May7-RUN2-Spot 284	126.42	49043.2	1.10277	12.6538	1.07768	2.17093	2.93866	0.199321	2.73393	0.93033	1171.67	29.2904	1171.78	20.4314	1172.85	21.3334	1172.85	21.3334	99.8993
He7-JH16p42-May7-RUN2-Spot 252	122.949	20137.1	1.14926	12.6032	1.22464	2.25321	3.45941	0.206049	3.23539	0.935245	1207.74	35.6333	1197.79	24.3335	1180.77	24.2105	1180.77	24.2105	102.284
He7-JH16p42-May7-RUN2-Spot 117	92.1393	27543.1	1.016	12.5193	1.13908	2.19748	2.57668	0.199615	2.31123	0.896979	1173.25	24.7922	1180.24	17.9826	1193.93	22.4642	1193.93	22.4642	98.2685
He7-JH16P42-Spot 23	96.0408	18876.6	0.872982	12.3712	1.18741	2.32554	2.69656	0.208749	2.42105	0.897829	1222.15	26.9534	1220.12	19.1493	1217.36	23.3324	1217.36	23.3324	100.393
He7-JH16p42-May7-RUN2-Spot 225	152.631	24625.7	2.33347	12.2333	1.13018	2.4153	3.18263	0.214388	2.9752	0.934825	1252.16	33.8596	1247.16	22.8576	1239.4	22.1598	1239.4	22.1598	101.029
He7-JH16P42-Spot 2	225.419	52628.4	3.20952	12.2181	1.21319	2.38464	2.95616	0.211404	2.69575	0.911909	1236.29	30.3267	1238	21.151	1241.85	23.769	1241.85	23.769	99.5529
He7-JH16P42-Spot 85	283.001	39840.3	2.07891	12.1624	0.998835	2.41563	2.89255	0.213175	2.71463	0.938488	1245.71	30.75	1247.26	20.7745	1250.78	19.5394	1250.78	19.5394	99.595
He7-JH16p42-May7-RUN2-Spot 208	390.209	241583	5.0998	11.9422	1.08804	2.46554	3.44079	0.21364	3.26424	0.948687	1248.18	37.0422	1261.99	24.8609	1286.43	21.1863	1286.43	21.1863	97.0265
He7-JH16p42-May7-RUN2-Spot 140	171.89	31463.9	1.51695	11.7925	1.10439	2.69657	2.85824	0.230731	2.63626	0.922336	1338.33	31.8605	1327.52	21.1741	1310.94	21.431	1310.94	21.431	102.089
He7-JH16P42-Spot 91	789.276	13313.3	1.27412	11.6451	1.33186	2.35491	3.2824	0.198977	3.00005	0.913981	1169.82	32.0954	1229.04	23.3987	1335.31	25.7562	1335.31	25.7562	87.6066
He7-JH16p42-May7-RUN2-Spot 149	112.483	11645.7	1.82931	11.5903	1.16318	2.65503	2.52951	0.22328	2.2462	0.887999	1299.18	26.4297	1316.04	18.6592	1344.43	22.4644	1344.43	22.4644	96.6343
He7-JH16p42-May7-RUN2-Spot 269	165.719	112091	1.82662	11.4072	1.38195	2.74538	3.03268	0.227232	2.69951	0.890141	1319.98	32.2218	1340.84	22.5753	1375.11	26.5767	1375.11	26.5767	95.9907
He7-JH16p42-May7-RUN2-Spot 165	515.356	51609.5	3.08853	11.127	1.06266	2.6662	2.78013	0.215257	2.56902	0.924066	1256.77	29.3345	1319.14	20.532	1422.79	20.3028	1422.79	20.3028	88.3313
He7-JH16p42-May7-RUN2-Spot 121	47.969	9313.81	1.30425	11.0514	1.35135	3.08675	2.84991	0.247518	2.50915	0.880432	1425.66	32.0929	1429.4	21.8601	1435.79	25.7734	1435.79	25.7734	99.2947
He7-JH16P42-Spot 24	928.546	61328.6	1.02965	10.9617	1.32368	3.01017	3.35893	0.239417	3.08712	0.919077	1383.67	38.4428	1410.2	25.6066	1451.33	25.1928	1451.33	25.1928	95.3381
He7-JH16p42-May7-RUN2-Spot 174	254.402	68339.8	1.39681	10.9135	1.0048	3.11388	2.49542	0.246577	2.28418	0.915351	1420.8	29.1263	1436.12	19.1812	1459.71	19.1017	1459.71	19.1017	97.3342
He7-JH16p42-May7-RUN2-Spot 142	65.9574	23399.6	1.5305	10.9036	1.2117	3.22536	3.06727	0.255174	2.81779	0.918663	1465.11	36.9287	1463.27	23.7781	1461.43	23.0301	1461.43	23.0301	100.252
He7-JH16p42-May7-RUN2-Spot 308	357.058	62717.5	2.31146	10.6991	1.4418	3.18006	2.50241	0.246872	2.0453	0.817334	1422.33	26.1053	1452.33	19.3327	1497.32	27.2707	1497.32	27.2707	94.9915
He7-JH16p42-May7-RUN2-Spot 279	89.2514	42281	0.683075	10.6238	1.33268	3.61618	2.95324	0.27875	2.63545	0.892392	1585.07	37.0346	1553.1	23.4949	1510.68	25.1618	1510.68	25.1618	104.924
He7-JH16p42-May7-RUN2-Spot 170	170.638	2.1918e+06	1.90856	10.6014	1.1177	3.35337	3.14257	0.257949	2.93709	0.934614	1479.34	38.825	1493.58	24.5842	1514.65	21.0911	1514.65	21.0911	97.6687
He7-JH16P42-Spot 89	710.984	98434.2	2.39912	10.4225	1.22703	3.46918	3.18716	0.262354	2.94149	0.92292	1501.88	39.4093	1520.24	25.1259	1546.7	23.0581	1546.7	23.0581	97.1023
He7-JH16p42-May7-RUN2-Spot 251	145.873	51199.4	1.26353	10.2395	1.19557	3.72109	2.69794	0.276464	2.41857	0.896451	1573.53	33.7684	1575.91	21.5951	1579.91	22.3677	1579.91	22.3677	99.5963
He7-JH16P42-Spot 76	164.869	24536.6	0.903029	10.207	1.30993	3.77729	2.87704	0.279746	2.56153	0.890335	1590.09	36.0963	1587.93	23.102	1585.87	24.4886	1585.87	24.4886	100.266
He7-JH16p42-May7-RUN2-Spot 237	118.224	1.66718e+06	0.651146	10.1897	1.18392	3.44761	3.20389	0.254899	2.97713	0.929221	1463.69	38.9834	1515.32	25.2225	1589.03	22.1233	1589.03	22.1233	92.1121
He7-JH16P42-Spot 67	255.586	87056.8	1.45632	9.24632	1.49503	4.54096	3.55311	0.304652	3.22327	0.907169	1714.34	48.5214	1738.51	29.5749	1768.49	27.306	1768.49	27.306	96.938
He7-JH16P42-Spot 102	587.925	175800	3.06162	9.21574	1.1658	4.57267	3.01521	0.305765	2.78071	0.92223	1719.83	41.9762	1744.3	25.1271	1774.54	21.2775	1774.54	21.2775	96.9173
He7-JH16p42-May7-RUN2-Spot 231	424.892	308410	3.1741	9.20433	1.29849	4.19633	2.93753	0.280252	2.63496	0.896998	1592.63	37.1835	1673.3	24.0917	1776.8	23.693	1776.8	23.693	89.635
He7-JH16P42-Spot 17	74.4245	32232.4	1.71365	9.1673	1.23103	4.67322	2.96498	0.310846	2.69735	0.909735	1744.87	41.234	1762.46	24.8042	1784.15	22.4414	1784.15	22.4414	97.7987
He7-JH16p42-May7-RUN2-Spot 275	174.505	82214.2	1.28085	9.15066	1.46235	4.64791	3.05615	0.308601	2.68357	0.878091	1733.82	40.797	1757.92	25.5426	1787.46	26.6482	1787.46	26.6482	96.9992
He7-JH16p42-May7-RUN2-Spot 299	539.946	148200	2.30048	9.14682	1.16177	3.99824	3.3126	0.265354	3.1022	0.936483	1517.18	41.938	1633.84	26.9124	1788.22	21.1681	1788.22	21.1681	84.8428
He7-JH16p42-May7-RUN2-Spot 136	178.965	32438.4	1.21851	9.14221	1.10908	4.93127	2.3668	0.327113	2.09086	0.883411	1824.37	33.2228	1807.62	19.9829	1789.14	20.2055	1789.14	20.2055	101.969
He7-JH16P42-Spot 38	468.712	102798	5.80657	9.09406	0.977391	4.77144	3.17484	0.314844	3.02065	0.951433	1764.5	46.628	1779.89	26.6573	1798.76	17.7868	1798.76	17.7868	98.0954
He7-JH16P42-Spot 73	890.106	191917	2.89612	9.08297	1.34075	5.09303	3.53806	0.335654	3.27418	0.925417	1865.73	53.0431	1834.95	30.0376	1800.98	24.3896	1800.98	24.3896	103.595
He7-JH16P42-Spot 68	82.3176	28522.6	0.941808	9.05178	1.20321	5.13199	2.29893	0.33706	1.95892	0.852101	1872.51	31.8342	1841.42	19.5386	1807.23	21.872	1807.23	21.872	103.612
He7-JH16p42-May7-RUN2-Spot 262	167.866	74540.8	1.02886	8.9176	1.30716	4.9021	2.85616	0.317189	2.53948	0.889126	1775.99	39.4221	1802.62	24.0918	1834.33	23.6815	1834.33	23.6815	96.8193
He7-JH16p42-May7-RUN2-Spot 306	294.427	82517	2.2483	8.81247	1.10389	5.11743	2.95128	0.327218	2.73705	0.927413	1824.88	43.5014	1839	25.0733	1855.79	19.948	1855.79	19.948	98.3347
He7-JH16p42-May7-RUN2-Spot 178	153.472	394606	0.685428	8.80154	1.23623	5.18528	2.31308	0.331146	1.95501	0.845198	1843.93	31.3519	1850.2	19.6919	1858.03	22.3338	1858.03	22.3338	99.2413
He7-JH16p42-May7-RUN2-Spot 153	70.8868	25057.2	1.01374	8.75533	1.55132	5.16986	2.89935	0.328427	2.44942	0.844816	1830.75	39.038	1847.67	24.6728	1867.53	27.9932	1867.53	27.9932	98.0305
He7-JH16P42-Spot 11	286.93	198476	5.02251	8.61704	0.940943	5.25401	3.63653	0.328501	3.51269	0.965945	1831.11	55.9942	1861.42	31.0302	1896.21	16.9206	1896.21	16.9206	96.5667
He7-JH16p42-May7-RUN2-Spot 151	236.179	110621	3.28857	8.616	1.12773	5.2295	2.59848	0.326929	2.34101	0.900914	1823.48	37.1819	1857.44	22.1526	1896.43	20.2796	1896.43	20.2796	96.1532
He7-JH16p42-May7-RUN2-Spot 222	271.331	114111	2.60523	8.6019	1.07447	4.9844	3.20124	0.311096	3.01553	0.94199	1746.1	46.1264	1816.68	27.0797	1899.38	19.3148	1899.38	19.3148	91.93
He7-JH16P42-Spot 106	404.295	86145.3	3.98419	8.33332	1.25968	5.38665	3.5109	0.325705	3.27713	0.933418	1817.53	51.9038	1882.73	30.076	1956.21	22.4929	1956.21	22.4929	92.911
He7-JH16P42-Spot 65	167.005	15816.1	1.38622	8.21546	1.42195	6.20219	3.19761	0.369713	2.86405	0.895684	2028.05	49.8359	2004.76	27.967	1981.6	25.3135	1981.6	25.3135	102.344
He7-JH16p42-May7-RUN2-Spot 148	95.5198	1824.38	0.956565	7.79269	2.15161	5.57484	3.69626	0.315216	3.00548	0.813114	1766.32	46.4355	1912.22	31.8333	2075.14	37.8977	2075.14	37.8977	85.1182
He7-JH16p42-May7-RUN2-Spot 164	83.679	36468.3	0.610552	7.73375	0.894828	6.55813	2.78186	0.368009	2.63401	0.946853	2020.02	45.6786	2053.74	24.514	2088.5	15.7355	2088.5	15.7355	96.7211
He7-JH16p42-May7-RUN2-Spot 130	205.71	63987.6	1.5004	7.67514	1.26981	6.43735	2.80105	0.358493	2.49669	0.891341	1975.03	42.473	2037.38	24.6221	2101.87	22.2972	2101.87	22.2972	93.9651
He7-JH16p42-May7-RUN2-Spot 129	402.125	142826	2.45656	7.64325	1.23252	6.39363	2.81566	0.354579	2.53157	0.899103	1956.43	42.7192	2031.39	24.7278	2109.18	21.6245	2109.18	21.6245	92.7577
He7-JH16p42-May7-RUN2-Spot 166	77.7772	32216.6	1.52062	7.17545	1.52731	8.08331	2.68374	0.420849	2.20676	0.822271	2264.33	42.1365	2240.38	24.2548	2219.31	26.4737	2219.31	26.4737	102.029
He7-JH16p42-May7-RUN2-Spot 224	188.667	36170	1.32892	6.86885	1.36909	8.27909	2.47265	0.412624	2.05903	0.832721	2226.91	38.7716	2262.03	22.4047	2294.69	23.5393	2294.69	23.5393	97.0463
He7-JH16p42-May7-RUN2-Spot 214	343.125	44765.6	0.860186	6.7159	1.38226	8.06831	2.84221	0.393165	2.48345	0.873774	2137.49	45.1807	2238.7	25.6824	2333.32	23.6692	2333.32	23.6692	91.607
He7-JH16P42-Spot 29	823.651	390842	6.81445	6.69579	0.950821	7.83118	2.64444	0.380466	2.46759	0.933124	2078.46	43.8418	2211.8	23.8151	2338.46	16.2714	2338.46	16.2714	88.8817
He7-JH16P42-Spot 32	152.316	32669.9	2.95814	6.67911	1.17831	8.78703	2.98705	0.425842	2.74483	0.918908	2286.94	52.8469	2316.15	27.2375	2342.73	20.1562	2342.73	20.1562	97.6189
He7-JH16p42-May7-RUN2-Spot 187	121.085	136287	1.32825	6.63179	1.174	8.18247	3.09333	0.393734	2.86189	0.925181	2140.12	52.1199	2251.4	27.9957	2354.87	20.0571	2354.87	20.0571	90.8806
He7-JH16P42-Spot 8	898.818	320590	0.530428	6.5415	0.936627	9.69821	3.01169	0.460316	2.86234	0.950411	2440.95	58.1649	2406.54	27.7286	2378.27	15.962	2378.27	15.962	102.636
He7-JH16p42-May7-RUN2-Spot 249	853.092	81010.3	40.7637	6.53407	1.38788	8.77369	3.4078	0.415963	3.11238	0.91331	2242.12	58.9421	2314.76	31.0716	2380.2	23.6496	2380.2	23.6496	94.1988
He7-JH16P42-Spot 69	621.046	1.6089e+06	2.19522	6.50983	1.18475	10.01	2.70959	0.472813	2.43685	0.899344	2495.88	50.431	2435.7	25.0189	2386.53	20.1743	2386.53	20.1743	104.582
He7-JH16p42-May7-RUN2-Spot 180	441.108	1.70545e+06	1.91838	6.46151	1.08594	9.70122	3.0575	0.454829	2.85815	0.934801	2416.69	57.6039	2406.82	28.1514	2399.21	18.4673	2399.21	18.4673	100.728
He7-JH16p42-May7-RUN2-Spot 111	385.45	371553	2.00869	6.42813	1.22452	9.40514	3.42759	0.43867	3.2014	0.934007	2344.68	62.9286	2378.33	31.4685	2408.02	20.8057	2408.02	20.8057	97.3698
He7-JH16P42-Spot 101	221.916	88862.4	1.07747	6.35305	1.14054	10.1335	3.20732	0.467119	2.99767	0.934636	2470.91	61.5287	2447.03	29.6499	2427.96	19.339	2427.96	19.339	101.769
He7-JH16p42-May7-RUN2-Spot 206	135.227	94811	6.20907	6.31665	1.16096	10.1585	2.57151	0.465591	2.29452	0.892286	2464.2	46.9905	2449.31	23.775	2437.7	19.6659	2437.7	19.6659	101.087
He7-JH16p42-May7-RUN2-Spot 267	366.641	403113	1.38082	6.26913	1.45631	9.87753	3.35206	0.449307	3.01919	0.900696	2392.17	60.3398	2423.41	30.9168	2450.48	24.6381	2450.48	24.6381	97.6205
He7-JH16p42-May7-RUN2-Spot 181	1088.62	15525.2	6.67816	6.26622	1.29058	8.34146	2.75263	0.379259	2.43133	0.883275	2072.82	43.0981	2268.84	24.9627	2451.26	21.832	2451.26	21.832	84.5614
He7-JH16p42-May7-RUN2-Spot 253	180.348	36323.6	1.38886	6.2518	1.33899	9.84797	3.53091	0.446725	3.26717	0.925306	2380.68	65.0367	2420.65	32.5584	2455.16	22.6422	2455.16	22.6422	96.9662
He7-JH16p42-May7-RUN2-Spot 152	938.746	199354	5.15518	6.24939	1.30353	9.98644	2.44197	0.452831	2.06495	0.84561	2407.83	41.4911	2433.53	22.5421	2455.81	22.0408	2455.81	22.0408	98.046
He7-JH16P42-Spot 7	479.845	173614	1.91529	6.24906	1.20585	10.2979	2.51449	0.466931	2.20648	0.877508	2470.09	45.2761	2461.92	23.2759	2455.9	20.3888	2455.9	20.3888	100.578
He7-JH16p42-May7-RUN2-Spot 300	691.659	3.51958e+06	4.569	6.24317	1.27126	10.096	3.46876	0.457344	3.22741	0.930423	2427.82	65.2932	2443.61	32.0576	2457.5	21.4915	2457.5	21.4915	98.7923
He7-JH16p42-May7-RUN2-Spot 314	186.659	76905.4	1.29827	6.24148	1.25423	9.59825	2.94864	0.434678	2.66859	0.905025	2326.77	52.1222	2397	27.1214	2457.95	21.2025	2457.95	21.2025	94.6629
He7-JH16P42-Spot 81	292.38	277382	2.97273	6.23546	1.23635	9.63597	3.69657	0.435965	3.48369	0.942411	2332.55	68.1839	2400.61	34.0181	2459.58	20.8967	2459.58	20.8967	94.8352
He7-JH16p42-May7-RUN2-Spot 194	366.416	995499	0.981813	6.22963	1.22467	8.75786	2.83181	0.395866	2.5533	0.901649	2149.97	46.68	2313.12	25.8125	2461.17	20.696	2461.17	20.696	87.3559
He7-JH16p42-May7-RUN2-Spot 185	182.872	93270.9	1.49449	6.21251	1.25725	10.195	2.41382	0.45956	2.06054	0.853646	2437.62	41.8241	2452.63	22.3237	2465.82	21.2367	2465.82	21.2367	98.8564
He7-JH16p42-May7-RUN2-Spot 144	183.402	41642.1	0.67196	6.2084	1.42959	10.5475	2.53481	0.475134	2.09322	0.825787	2506.04	43.4634	2484.1	23.5134	2466.93	24.1458	2466.93	24.1458	101.585
He7-JH16P42-Spot 70	66.1233	308635	0.567409	6.20187	1.36694	10.763	3.24465	0.484335	2.94265	0.906926	2546.12	61.8991	2502.88	30.1537	2468.71	23.0833	2468.71	23.0833	103.136
He7-JH16P42-Spot 34	354.704	193436	1.07834	6.20051	1.09366	10.3337	2.63407	0.464913	2.3963	0.909732	2461.21	49.0261	2465.13	24.3907	2469.08	18.4668	2469.08	18.4668	99.6816
He7-JH16P42-Spot 48	548.008	144182	4.42085	6.16156	1.24688	10.7316	3.0759	0.479781	2.81184	0.914153	2526.31	58.7715	2500.16	28.5775	2479.71	21.0322	2479.71	21.0322	101.879
He7-JH16p42-May7-RUN2-Spot 244	90.4313	24924.2	1.52423	6.15978	1.17151	10.1673	2.7802	0.454421	2.52133	0.906887	2414.88	50.7838	2450.11	25.7073	2480.2	19.7596	2480.2	19.7596	97.3662
He7-JH16P42-Spot 49	63.8589	38831.4	1.02955	6.12674	0.987807	10.7	2.53379	0.475667	2.3333	0.920877	2508.36	48.4856	2497.43	23.5329	2489.27	16.6482	2489.27	16.6482	100.767
He7-JH16p42-May7-RUN2-Spot 119	27.9134	347031	4.95015	6.11776	1.16649	10.7674	3.20828	0.477961	2.98871	0.931561	2518.38	62.3082	2503.26	29.8166	2491.74	19.652	2491.74	19.652	101.069
He7-JH16p42-May7-RUN2-Spot 236	123.801	92226	1.44187	6.11281	1.03249	10.5002	2.61248	0.465721	2.3998	0.918589	2464.77	49.1559	2479.93	24.2247	2493.1	17.3917	2493.1	17.3917	98.8635
He7-JH16p42-May7-RUN2-Spot 302	185.326	47106.3	1.41385	6.10759	1.29007	9.42317	3.12366	0.417594	2.84481	0.910731	2249.55	54.0237	2380.09	28.6818	2494.54	21.7286	2494.54	21.7286	90.1789
He7-JH16P42-Spot 14	334.217	107958	2.06814	6.09696	1.19669	11.1289	2.0967	0.492326	1.72165	0.821125	2580.73	36.6148	2533.98	19.5366	2497.48	20.1494	2497.48	20.1494	103.334
He7-JH16p42-May7-RUN2-Spot 183	75.1994	123998	1.47241	6.08613	1.26105	10.8456	2.9573	0.478941	2.67495	0.904526	2522.65	55.844	2509.98	27.4997	2500.47	21.2271	2500.47	21.2271	100.887
He7-JH16P42-Spot 79	601.782	49748.5	2.98274	6.08284	1.33585	11.0588	3.40472	0.488094	3.13172	0.919815	2562.42	66.22	2528.1	31.7144	2501.38	22.4844	2501.38	22.4844	102.44
He7-JH16p42-May7-RUN2-Spot 228	202.209	117304	0.570097	6.07001	0.960418	10.2642	2.55236	0.452067	2.36477	0.926503	2404.44	47.4604	2458.88	23.6197	2504.93	16.1584	2504.93	16.1584	95.988
He7-JH16p42-May7-RUN2-Spot 160	263.169	73536.5	1.80397	6.05968	1.37079	11.0735	3.58307	0.486879	3.31048	0.923925	2557.16	69.8831	2529.33	33.3805	2507.8	23.0579	2507.8	23.0579	101.968
He7-JH16P42-Spot 12	95.1688	97624.3	1.28325	6.03098	1.25885	10.6121	3.08789	0.464385	2.81964	0.913128	2458.89	57.643	2489.77	28.6615	2515.78	21.1579	2515.78	21.1579	97.7388
He7-JH16p42-May7-RUN2-Spot 131	397.749	85793.4	0.990739	6.0017	1.01793	11.092	2.84139	0.483029	2.65279	0.933625	2540.45	55.7002	2530.89	26.471	2523.95	17.0941	2523.95	17.0941	100.653
He7-JH16p42-May7-RUN2-Spot 132	159.564	4.13073e+06	1.90295	5.97226	0.924362	11.4497	2.62877	0.49616	2.46089	0.936138	2597.27	52.6095	2560.49	24.5529	2532.21	15.5126	2532.21	15.5126	102.57
He7-JH16p42-May7-RUN2-Spot 315	16.7468	565055	1.17672	5.9477	1.29316	10.4371	3.58241	0.45042	3.34086	0.932575	2397.12	66.8831	2474.35	33.2065	2539.12	21.6846	2539.12	21.6846	94.4074
He7-JH16P42-Spot 86	76.5709	37058.6	0.573463	5.80331	1.14836	11.0786	2.96788	0.466495	2.73671	0.92211	2468.17	56.121	2529.76	27.6473	2580.25	19.1784	2580.25	19.1784	95.6565
He7-JH16p42-May7-RUN2-Spot 303	221.481	74823.7	1.15127	5.5281	1.36755	12.44	3.80362	0.49898	3.54927	0.93313	2609.41	76.1666	2638.2	35.7625	2661.07	22.6636	2661.07	22.6636	98.0587
He7-JH16p42-May7-RUN2-Spot 254	135.333	33679.2	2.35388	5.38534	0.978316	13.441	2.94048	0.525208	2.77296	0.943031	2721.23	61.557	2711.14	27.7965	2704.34	16.1493	2704.34	16.1493	100.625
He7-JH16p42-May7-RUN2-Spot 260	386.887	109626	2.19028	5.30669	1.11624	13.1204	2.71715	0.505196	2.47728	0.91172	2636.09	53.6006	2688.35	25.6411	2728.59	18.381	2728.59	18.381	96.6097
He7-JH16p42-May7-RUN2-Spot 190	435.587	163374	5.75334	5.26825	1.1003	13.3603	2.88965	0.510705	2.67196	0.924668	2659.64	58.2305	2705.46	27.3043	2740.56	18.0985	2740.56	18.0985	97.0473
He7-JH16P42-Spot 18	163.335	15477.3	0.600183	5.20681	0.997116	12.0284	2.66	0.454431	2.46604	0.927083	2414.92	49.6708	2606.62	24.9411	2759.84	16.3751	2759.84	16.3751	87.5022
He7-JH16P42-Spot 20	118.137	38416.2	1.2917	5.00805	1.34737	14.5991	2.88622	0.530495	2.55242	0.884347	2743.54	57.0335	2789.47	27.4341	2823.56	21.9963	2823.56	21.9963	97.1658
He7-JH16P42-Spot 93	294.889	45199.8	5.8823	4.9262	2.15375	14.7877	4.40255	0.528568	3.83977	0.872169	2735.41	85.5982	2801.68	41.895	2850.43	35.0772	2850.43	35.0772	95.9651
He7-JH16p42-May7-RUN2-Spot 265	427.961	250671	2.02666	4.59483	1.11607	15.0202	2.73687	0.500763	2.49897	0.913076	2617.08	53.7538	2816.52	26.0607	2963.27	18.0003	2963.27	18.0003	88.3172
He7-JH16p42-May7-RUN2-Spot 218	86.0011	67797.5	3.74661	4.26212	0.964839	19.8903	2.94556	0.615114	2.78306	0.944832	3090.45	68.3297	3086.04	28.4845	3083.86	15.3989	3083.86	15.3989	100.214
Notes: see Table S5a

## Sheet: K6-1
Table S5g. U-Pb geochronologic analyses.		JHPM16-K6-1
							Isotope ratios						Apparent ages (Ma)
Analysis	U	206Pb	U/Th	206Pb*	±	207Pb*	±	206Pb*	±	error	206Pb*	±	207Pb*	±	206Pb*	±	Best age	±	Conc
	(ppm)	204Pb		207Pb*	(%)	235U*	(%)	238U	(%)	corr.	238U*	(Ma)	235U	(Ma)	207Pb*	(Ma)	(Ma)	(Ma)	(%)
He8 JH16-k6-1 run2 11May17-Spot 221	1316.57	3304.15	0.661971	13.01	1.56029	0.339999	3.16531	0.0320953	2.75403	0.870066	203.649	5.52088	297.171	8.15508	1117.68	31.1402	203.649	5.52088	NA
He8-JH16K61-Spot 35	157.858	2172.48	0.811904	21.9663	7.65982	0.216135	8.17088	0.0344484	2.84436	0.34811	218.33	6.1061	198.688	14.7459	NA	NA	218.33	6.1061	NA
He8 JH16-k6-1 run2 11May17-Spot 246	104.721	16099.5	1.45738	19.6511	1.66586	0.246133	2.99664	0.0350949	2.49094	0.831243	222.357	5.44434	223.43	6.01002	235.775	38.4373	222.357	5.44434	NA
He8-JH16K61-Spot 5	590.292	57640.4	1.88408	19.0608	1.21861	0.255433	2.73986	0.0353268	2.45394	0.895644	223.801	5.3977	230.98	5.66038	305.657	27.7426	223.801	5.3977	NA
He8 JH16-k6-1 run2 11May17-Spot 235	120.219	13379.4	1.46669	19.3039	1.88864	0.253129	3.26803	0.0354547	2.66703	0.816098	224.597	5.88694	229.115	6.70299	276.751	43.2565	224.597	5.88694	NA
He8-JH16K61-Spot 3	902.483	11463.4	1.60969	18.2098	1.47991	0.273938	2.83361	0.0361946	2.41645	0.85278	229.202	5.44124	245.837	6.18699	408.767	33.1093	229.202	5.44124	NA
He8 JH16-k6-1 run2 11May17-Spot 198	38.0333	2115.44	1.9213	21.2166	2.78754	0.236282	4.38617	0.0363744	3.38646	0.772077	230.32	7.66202	215.372	8.51215	55.9468	66.4734	230.32	7.66202	NA
He8 JH16-k6-1 run2 11May17-Spot 113	1616.9	6625	2.85154	14.6694	1.26375	0.341862	2.94728	0.0363874	2.66259	0.903406	230.401	6.02631	298.582	7.62436	873.684	26.1553	230.401	6.02631	NA
He8 JH16-k6-1 run2 11May17-Spot 176	638.979	21958	1.50326	19.6055	1.42152	0.258931	2.92755	0.036834	2.55927	0.8742	233.179	5.86102	233.805	6.11395	241.113	32.7445	233.179	5.86102	NA
He8 JH16-k6-1 run2 11May17-Spot 87	461.854	95482.3	1.20915	18.1586	1.54772	0.282367	2.66933	0.0372035	2.17483	0.814748	235.476	5.0288	252.533	5.96813	415.055	34.5892	235.476	5.0288	NA
He8 JH16-k6-1 run2 11May17-Spot 185	142.266	10459.2	1.34872	19.6994	1.66938	0.262445	3.73348	0.0375127	3.33947	0.894466	237.397	7.78361	236.635	7.88096	230.064	38.535	237.397	7.78361	NA
He8 JH16-k6-1 run2 11May17-Spot 167	575.158	6927.79	1.44532	16.0168	3.41849	0.323821	4.48487	0.0376329	2.9031	0.64731	238.144	6.78742	284.837	11.1397	689.044	72.9476	238.144	6.78742	NA
He8-JH16K61-Spot 33	152.739	6815.33	1.15203	20.0588	1.88724	0.259584	2.71325	0.0377808	1.94937	0.718464	239.063	4.57486	234.331	5.67772	188.139	43.9244	239.063	4.57486	NA
He8 JH16-k6-1 run2 11May17-Spot 232	332.48	27332.1	1.65997	16.7713	3.8233	0.310725	4.55198	0.037812	2.47041	0.54271	239.257	5.80227	274.742	10.9575	590.024	82.9339	239.257	5.80227	NA
He8 JH16-k6-1 run2 11May17-Spot 267	636.638	70722.5	1.52652	19.4914	1.49258	0.269699	3.58832	0.0381427	3.26317	0.909385	241.31	7.72879	242.453	7.73941	254.559	34.3212	241.31	7.72879	NA
He8 JH16-k6-1 run2 11May17-Spot 200	278.93	39656.9	1.35475	18.4924	1.72999	0.28439	3.29094	0.0381589	2.79954	0.850681	241.411	6.6334	254.134	7.39904	374.208	38.9237	241.411	6.6334	NA
He8 JH16-k6-1 run2 11May17-Spot 276	253.91	1.17477e+06	1.65577	19.1447	1.39321	0.274885	3.92478	0.0381846	3.66918	0.934874	241.57	8.69963	246.592	8.59282	295.658	31.7884	241.57	8.69963	NA
He8 JH16-k6-1 run2 11May17-Spot 161	1710.13	4658.98	3.69378	13.4552	1.18813	0.391301	3.25773	0.0382024	3.03333	0.93112	241.681	7.19527	335.32	9.30351	1050.2	23.9668	241.681	7.19527	NA
He8 JH16-k6-1 run2 11May17-Spot 252	321.665	54290.9	1.97197	19.5029	1.36689	0.271022	3.63983	0.0383523	3.37342	0.926808	242.612	8.03222	243.51	7.88081	253.193	31.4205	242.612	8.03222	NA
He8 JH16-k6-1 run2 11May17-Spot 277	180.887	89747.1	1.09173	19.4154	1.56781	0.272873	3.23144	0.0384411	2.82563	0.874418	243.163	6.74292	244.988	7.03411	263.516	35.9913	243.163	6.74292	NA
He8 JH16-k6-1 run2 11May17-Spot 234	305.392	12561.4	2.00632	19.9154	1.20353	0.266196	2.70504	0.038466	2.42255	0.895569	243.318	5.78463	239.648	5.77442	204.865	27.9253	243.318	5.78463	NA
He8 JH16-k6-1 run2 11May17-Spot 103	174.573	37704	0.99994	19.3164	1.43433	0.275516	2.40777	0.0386154	1.93393	0.803201	244.245	4.63515	247.094	5.28093	275.22	32.8592	244.245	4.63515	NA
He8 JH16-k6-1 run2 11May17-Spot 203	270.056	8911.95	1.55746	19.8859	1.7468	0.26809	3.43101	0.0386824	2.95305	0.860694	244.661	7.08955	241.165	7.36528	208.296	40.5217	244.661	7.08955	NA
He8-JH16K61-Spot 54	640.97	343549	1.36673	19.7586	1.28716	0.270446	2.80169	0.0387727	2.48851	0.888218	245.221	5.98774	243.051	6.05591	223.145	29.7663	245.221	5.98774	NA
He8 JH16-k6-1 run2 11May17-Spot 120	154.329	11057.2	1.11125	19.735	1.33443	0.272571	3.07392	0.0390305	2.76917	0.900858	246.82	6.70568	244.747	6.68539	225.909	30.831	246.82	6.70568	NA
He8 JH16-k6-1 run2 11May17-Spot 269	153.816	1.12536e+06	1.3741	18.8938	1.5123	0.290222	3.18924	0.0397866	2.80788	0.880423	251.51	6.92612	258.734	7.28436	325.707	34.3123	251.51	6.92612	NA
He8 JH16-k6-1 run2 11May17-Spot 78	270.581	30479.7	1.57914	19.301	1.3835	0.284915	3.25973	0.039901	2.95157	0.905465	252.219	7.30068	254.549	7.33938	277.085	31.6946	252.219	7.30068	NA
He8 JH16-k6-1 run2 11May17-Spot 261	110.04	30403.1	0.887224	19.5316	1.89441	0.281669	3.38165	0.0399176	2.80121	0.828355	252.322	6.93153	251.98	7.54622	249.784	43.6062	252.322	6.93153	NA
He8 JH16-k6-1 run2 11May17-Spot 253	95.6655	17733.7	2.05078	17.6296	2.74221	0.314592	3.2451	0.0402419	1.7352	0.534715	254.332	4.32726	277.734	7.8854	480.75	60.6156	254.332	4.32726	NA
He8 JH16-k6-1 run2 11May17-Spot 112	145.227	9690.17	1.75884	20.242	1.81756	0.274539	2.79125	0.0403224	2.11838	0.758938	254.831	5.29299	246.316	6.10498	166.939	42.4711	254.831	5.29299	NA
He8 JH16-k6-1 run2 11May17-Spot 296	231.415	16738	1.28018	19.6921	1.54585	0.282258	3.51942	0.0403298	3.16175	0.898372	254.877	7.90134	252.447	7.86649	230.917	35.6931	254.877	7.90134	NA
He8 JH16-k6-1 run2 11May17-Spot 265	807.386	76871	2.55406	19.3608	1.20763	0.288735	2.93697	0.0405612	2.6772	0.911553	256.311	6.72733	257.563	6.68147	269.957	27.6952	256.311	6.72733	NA
He8-JH16K61-Spot 49	305.218	84670.9	1.54806	19.1133	1.34118	0.294671	3.06465	0.0408659	2.75559	0.899155	258.198	6.97429	262.229	7.08264	299.378	30.5921	258.198	6.97429	NA
He8 JH16-k6-1 run2 11May17-Spot 233	120.488	20076.5	0.724206	19.2197	1.35214	0.299643	2.86786	0.0417868	2.52909	0.881876	263.899	6.53949	266.122	6.71389	286.742	30.907	263.899	6.53949	NA
He8 JH16-k6-1 run2 11May17-Spot 272	120.731	39044.5	0.726963	18.6722	1.6737	0.309696	3.05171	0.0419585	2.5518	0.836186	264.961	6.62421	273.946	7.32733	352.384	37.8067	264.961	6.62421	NA
He8 JH16-k6-1 run2 11May17-Spot 222	395.89	20304	2.95822	19.4415	1.46977	0.299231	3.3289	0.0422108	2.98687	0.897253	266.522	7.79835	265.8	7.78503	260.458	33.7595	266.522	7.79835	NA
He8 JH16-k6-1 run2 11May17-Spot 69	394.703	42528.4	2.3873	19.5047	1.12684	0.298337	3.11655	0.0422215	2.9057	0.932346	266.588	7.58828	265.101	7.27162	252.999	25.9184	266.588	7.58828	NA
He8 JH16-k6-1 run2 11May17-Spot 124	80.7192	154695	1.19474	18.3726	1.53838	0.31879	3.48661	0.0424976	3.12887	0.897396	268.296	8.22234	280.972	8.55802	388.813	34.5178	268.296	8.22234	NA
He8-JH16K61-Spot 62	463.374	20619.5	2.05754	19.4206	1.29341	0.302795	3.1163	0.0426677	2.83521	0.9098	269.347	7.47922	268.581	7.35443	262.923	29.6904	269.347	7.47922	NA
He8 JH16-k6-1 run2 11May17-Spot 144	679.552	138863	0.892105	19.4121	1.08098	0.306417	2.88962	0.0431592	2.67981	0.927392	272.386	7.14736	271.4	6.8819	263.88	24.8166	272.386	7.14736	NA
He8 JH16-k6-1 run2 11May17-Spot 210	210.575	18120.7	1.5852	19.5234	1.37278	0.305412	2.68666	0.0432642	2.30946	0.859604	273.035	6.17397	270.619	6.38245	250.75	31.5977	273.035	6.17397	NA
He8 JH16-k6-1 run2 11May17-Spot 307	378.874	12400.2	1.74692	19.4858	1.36217	0.31314	2.84888	0.0442737	2.50212	0.878282	279.269	6.83844	276.612	6.89823	255.207	31.3234	279.269	6.83844	NA
He8 JH16-k6-1 run2 11May17-Spot 76	287.031	72228.8	1.66594	19.5893	1.36884	0.313643	3.23715	0.0445803	2.93351	0.906199	281.161	8.07061	277.001	7.84803	242.989	31.5414	281.161	8.07061	NA
He8 JH16-k6-1 run2 11May17-Spot 83	593.89	14593.6	1.50814	16.8513	1.97894	0.367263	3.99014	0.0449053	3.46482	0.868347	283.167	9.59888	317.623	10.8833	579.712	42.9807	283.167	9.59888	NA
He8 JH16-k6-1 run2 11May17-Spot 158	114.481	14173.2	1.60582	18.9194	1.69941	0.332682	3.42382	0.0456693	2.97229	0.868123	287.879	8.36836	291.611	8.67867	322.631	38.5855	287.879	8.36836	NA
He8 JH16-k6-1 run2 11May17-Spot 211	66.0329	4439.92	1.89682	19.3376	2.46411	0.327617	3.45911	0.045968	2.42768	0.701822	289.72	6.87778	287.745	8.6676	272.71	56.4788	289.72	6.87778	NA
He8 JH16-k6-1 run2 11May17-Spot 171	618.443	186215	1.19772	19.2228	1.41516	0.329638	3.01037	0.0459772	2.657	0.882616	289.776	7.52889	289.29	7.57813	286.347	32.3469	289.776	7.52889	NA
He8 JH16-k6-1 run2 11May17-Spot 168	386.794	29764.6	2.50012	19.2026	1.15902	0.331408	3.13367	0.0461753	2.91145	0.929088	290.997	8.28388	290.64	7.92034	288.758	26.4879	290.997	8.28388	NA
He8 JH16-k6-1 run2 11May17-Spot 79	210.733	4661.87	1.21328	19.921	2.52074	0.320656	3.7723	0.0463489	2.80644	0.743961	292.067	8.01377	282.407	9.30032	204.159	58.4851	292.067	8.01377	NA
He8 JH16-k6-1 run2 11May17-Spot 301	3533	2271.56	5.42854	9.61963	1.10082	0.666025	2.66745	0.0464875	2.42971	0.910873	292.921	6.95786	518.293	10.8281	1695.87	20.29	292.921	6.95786	NA
He8-JH16K61-Spot 50	367.768	81371	1.15222	18.8412	1.27851	0.340233	2.58201	0.0465129	2.24326	0.868801	293.077	6.42725	297.349	6.65566	331.99	28.9937	293.077	6.42725	NA
He8 JH16-k6-1 run2 11May17-Spot 289	296.087	8343.77	2.2227	19.5472	1.05783	0.329259	2.94567	0.0466991	2.74918	0.933294	294.224	7.90693	289	7.40883	247.978	24.3363	294.224	7.90693	NA
He8 JH16-k6-1 run2 11May17-Spot 186	819.925	143105	2.54627	19.0683	1.25319	0.338873	2.9868	0.0468854	2.71117	0.90772	295.372	7.82735	296.318	7.67612	304.795	28.5764	295.372	7.82735	NA
He8 JH16-k6-1 run2 11May17-Spot 315	346.601	43998.6	1.25414	18.9574	1.298	0.342769	3.52715	0.0471486	3.27963	0.929824	296.992	9.51928	299.268	9.14253	318.028	29.5276	296.992	9.51928	NA
He8 JH16-k6-1 run2 11May17-Spot 146	381.889	35500.1	1.58281	19.3237	1.3028	0.336421	2.8042	0.0471696	2.4832	0.885528	297.121	7.21066	294.456	7.16781	274.351	29.842	297.121	7.21066	NA
He8 JH16-k6-1 run2 11May17-Spot 291	849.307	308746	2.24338	18.8718	1.15791	0.346086	3.25548	0.0473899	3.0426	0.934608	298.477	8.87444	301.773	8.49899	328.351	26.2972	298.477	8.87444	NA
He8 JH16-k6-1 run2 11May17-Spot 137	201.636	5705.63	1.06366	19.3884	2.08686	0.33896	3.32126	0.0476846	2.58375	0.777943	300.291	7.58081	296.384	8.53736	266.709	47.8855	300.291	7.58081	NA
He8 JH16-k6-1 run2 11May17-Spot 286	253.521	20104.1	0.943713	19.1325	1.20789	0.347502	3.11036	0.048241	2.86624	0.921514	303.713	8.50329	302.841	8.14476	297.124	27.5623	303.713	8.50329	NA
He8 JH16-k6-1 run2 11May17-Spot 271	452.406	47445.7	3.1967	19.0451	1.30864	0.35009	2.94047	0.0483783	2.63321	0.895507	304.557	7.83315	304.789	7.74234	307.559	29.7945	304.557	7.83315	NA
He8 JH16-k6-1 run2 11May17-Spot 104	198.026	45745.3	1.24676	19.6244	1.17	0.339868	2.84488	0.0483943	2.59315	0.911515	304.656	7.71643	297.072	7.32741	238.863	26.9904	304.656	7.71643	NA
He8 JH16-k6-1 run2 11May17-Spot 270	704.322	371245	2.17041	18.8801	1.19228	0.353568	2.90819	0.0484355	2.65255	0.912097	304.909	7.89959	307.401	7.71354	327.336	27.0507	304.909	7.89959	NA
He8 JH16-k6-1 run2 11May17-Spot 201	112.587	114013	1.76564	18.4148	1.58738	0.362898	2.51392	0.0484886	1.94936	0.775426	305.236	5.81146	314.376	6.79687	383.664	35.6707	305.236	5.81146	NA
He8-JH16K61-Spot 23	157.799	8704.27	1.73488	18.9018	1.69307	0.354725	3.17869	0.04865	2.69027	0.846347	306.228	8.04576	308.269	8.45139	324.703	38.4332	306.228	8.04576	NA
He8 JH16-k6-1 run2 11May17-Spot 170	971.095	2.23801e+06	2.5196	18.908	0.899792	0.35464	2.83059	0.0486541	2.68376	0.94813	306.253	8.02695	308.205	7.5245	324.001	20.4212	306.253	8.02695	NA
He8 JH16-k6-1 run2 11May17-Spot 248	145.147	11704.2	1.28368	18.8548	1.82408	0.356685	3.63815	0.0487972	3.14783	0.865229	307.133	9.44134	309.737	9.71247	330.354	41.3793	307.133	9.44134	NA
He8 JH16-k6-1 run2 11May17-Spot 74	833.929	326700	2.08901	18.0198	1.34555	0.375082	2.51912	0.0490414	2.12966	0.845399	308.633	6.41799	323.413	6.97723	432.186	29.9809	308.633	6.41799	NA
He8 JH16-k6-1 run2 11May17-Spot 275	170.63	34456.6	1.83283	18.9068	1.58735	0.363653	2.83587	0.0498877	2.35	0.82867	313.832	7.19843	314.939	7.67907	324.129	36.0487	313.832	7.19843	NA
He8 JH16-k6-1 run2 11May17-Spot 180	192.992	5063.14	1.58554	19.6749	1.18849	0.352232	2.69357	0.0502839	2.4172	0.897394	316.265	7.46024	306.398	7.12431	232.929	27.4386	316.265	7.46024	NA
He8 JH16-k6-1 run2 11May17-Spot 299	360.678	37248.4	2.6498	19.1763	1.2797	0.36325	2.75651	0.0505426	2.44146	0.885706	317.852	7.57201	314.638	7.45809	291.912	29.2514	317.852	7.57201	NA
He8 JH16-k6-1 run2 11May17-Spot 81	418.622	18904.7	1.57757	18.4122	1.76858	0.386463	3.85614	0.0516301	3.42665	0.888622	324.522	10.845	331.783	10.9144	383.975	39.7413	324.522	10.845	NA
He8 JH16-k6-1 run2 11May17-Spot 313	500.88	34671.3	1.31109	18.9847	1.20621	0.37551	2.93193	0.0517266	2.67231	0.911453	325.113	8.4726	323.729	8.12737	314.778	27.4353	325.113	8.4726	NA
He8 JH16-k6-1 run2 11May17-Spot 302	211.448	9861.52	0.626896	19.4797	1.18844	0.366944	3.55817	0.0518644	3.35383	0.942572	325.958	10.6603	317.386	9.69883	255.92	27.3305	325.958	10.6603	NA
He8-JH16K61-Spot 61	136.779	1455.4	1.48398	14.7756	6.35651	0.488669	7.11307	0.0523898	3.19226	0.448788	329.177	10.2444	404.003	23.7128	858.729	132.054	329.177	10.2444	NA
He8-JH16K61-Spot 17	643.822	456395	0.741454	18.7868	1.23547	0.391047	3.13613	0.0533052	2.88252	0.919133	334.782	9.40387	335.134	8.95205	338.542	27.9656	334.782	9.40387	NA
He8 JH16-k6-1 run2 11May17-Spot 172	1379.75	8371.85	2.05937	15.1205	1.26234	0.492617	2.55026	0.0540459	2.21592	0.8689	339.313	7.32446	406.693	8.54645	810.648	26.4156	339.313	7.32446	NA
He8 JH16-k6-1 run2 11May17-Spot 212	375.388	304801	9.01179	18.3225	1.34034	0.410677	2.91983	0.0545976	2.59402	0.888413	342.687	8.65721	349.362	8.6312	394.936	30.0598	342.687	8.65721	NA
He8 JH16-k6-1 run2 11May17-Spot 72	1730.98	44448.8	2.79378	17.8512	1.17947	0.455047	3.12395	0.0589403	2.89274	0.925986	369.178	10.3793	380.807	9.92035	453.081	26.1844	369.178	10.3793	NA
He8 JH16-k6-1 run2 11May17-Spot 305	703.814	36708.8	3.37307	16.5153	1.21124	0.505246	3.01382	0.0605449	2.75971	0.915685	378.938	10.1562	415.247	10.272	623.259	26.1229	378.938	10.1562	NA
He8 JH16-k6-1 run2 11May17-Spot 121	137.727	13094.3	1.24254	18.1596	1.66256	0.488679	3.10611	0.06439	2.6237	0.844691	402.268	10.2318	404.01	10.3534	414.93	37.1564	402.268	10.2318	96.9484
He8 JH16-k6-1 run2 11May17-Spot 91	317.205	43071.8	1.82486	18.1256	1.29888	0.492011	3.0962	0.0647076	2.81058	0.907752	404.192	11.0113	406.28	10.3676	419.116	29.0068	404.192	11.0113	96.439
He8 JH16-k6-1 run2 11May17-Spot 151	713.784	183577	1.5929	18.1947	1.23139	0.497931	3.29868	0.0657359	3.06023	0.927711	410.415	12.1682	410.301	11.1344	410.614	27.5407	410.415	12.1682	99.9514
He8 JH16-k6-1 run2 11May17-Spot 166	251.342	25305.2	1.93025	17.7202	1.33842	0.518554	2.92188	0.0666732	2.59731	0.888917	416.082	10.4655	424.185	10.1314	469.435	29.63	416.082	10.4655	88.6346
He8 JH16-k6-1 run2 11May17-Spot 241	458.184	501546	2.21345	18.1576	1.10785	0.517943	2.59925	0.0682382	2.35133	0.904619	425.533	9.68259	423.776	9.00566	415.183	24.7573	425.533	9.68259	102.493
He8 JH16-k6-1 run2 11May17-Spot 279	405.628	34726.5	1.77328	18.1578	1.27823	0.518325	2.7927	0.0682895	2.483	0.889105	425.842	10.232	424.032	9.68064	415.151	28.5655	425.842	10.232	102.575
He8 JH16-k6-1 run2 11May17-Spot 249	448.614	1.41366e+06	1.54496	17.7657	1.24212	0.530561	3.01543	0.0683922	2.74772	0.91122	426.462	11.3388	432.182	10.614	463.773	27.5249	426.462	11.3388	91.9548
He8 JH16-k6-1 run2 11May17-Spot 206	251.364	131168	0.923897	18.0744	1.16016	0.533772	3.11721	0.0700013	2.89327	0.928161	436.164	12.202	434.31	11.0156	425.44	25.8796	436.164	12.202	102.521
He8 JH16-k6-1 run2 11May17-Spot 199	246.205	941114	2.49943	18.0887	1.23299	0.534253	3.33143	0.0701199	3.09486	0.928988	436.878	13.0728	434.628	11.7796	423.673	27.5131	436.878	13.0728	103.117
He8 JH16-k6-1 run2 11May17-Spot 290	177.034	34268.6	1.27207	17.9849	0.920476	0.540058	3.21927	0.0704752	3.08487	0.958251	439.018	13.0923	438.463	11.4633	436.499	20.4935	439.018	13.0923	100.577
He8 JH16-k6-1 run2 11May17-Spot 110	1087.94	2.33074e+06	2.78066	17.7004	1.47358	0.550486	3.82037	0.0706996	3.52474	0.922617	440.369	15.0036	445.315	13.7734	471.891	32.6266	440.369	15.0036	93.3201
He8 JH16-k6-1 run2 11May17-Spot 188	387.424	208846	1.40895	17.7012	0.913728	0.552251	2.93076	0.0709297	2.78468	0.950157	441.754	11.8894	446.47	10.5877	471.822	20.2405	441.754	11.8894	93.6272
He8 JH16-k6-1 run2 11May17-Spot 304	259.957	25710.6	2.40334	17.7833	1.21525	0.549959	3.34964	0.0709625	3.12143	0.931868	441.952	13.333	444.97	12.0687	461.545	26.9526	441.952	13.333	95.7549
He8-JH16K61-Spot 8	70.506	5796.21	2.08593	17.7937	1.38264	0.551643	3.26357	0.0712218	2.95621	0.905821	443.512	12.6703	446.072	11.7817	460.248	30.6576	443.512	12.6703	96.3636
He8 JH16-k6-1 run2 11May17-Spot 191	76.5003	11841.3	1.86078	17.8611	1.55422	0.551485	3.04622	0.0714711	2.6199	0.860048	445.013	11.2656	445.969	10.995	451.851	34.5279	445.013	11.2656	98.4865
He8-JH16K61-Spot 24	177.748	20656.8	1.11956	17.7239	1.43732	0.559708	3.34677	0.0719794	3.02242	0.903084	448.07	13.0826	451.336	12.1954	468.993	31.8429	448.07	13.0826	95.5387
He8-JH16K61-Spot 36	188.102	14957.5	1.11089	18.0161	1.17238	0.553314	2.53616	0.0723305	2.24892	0.886742	450.181	9.77881	447.165	9.17342	432.632	26.125	450.181	9.77881	104.056
He8 JH16-k6-1 run2 11May17-Spot 82	808.258	79885.1	2.37094	17.8546	0.806253	0.575165	2.65122	0.0745125	2.52565	0.952638	463.285	11.2904	461.349	9.83003	452.668	17.9212	463.285	11.2904	102.345
He8 JH16-k6-1 run2 11May17-Spot 262	303.227	46181.3	2.27312	17.4241	1.10248	0.590883	2.7288	0.0747034	2.49617	0.914752	464.43	11.1852	471.431	10.2915	506.624	24.2506	464.43	11.1852	91.6715
He8 JH16-k6-1 run2 11May17-Spot 215	279.929	66257.3	1.28756	17.6242	1.2793	0.600816	3.53999	0.0768315	3.30075	0.932417	477.183	15.1818	477.752	13.4914	481.425	28.2839	477.183	15.1818	99.1187
He8 JH16-k6-1 run2 11May17-Spot 175	338.547	74106.6	4.13383	17.6183	1.24026	0.622217	2.67909	0.0795414	2.37471	0.886389	493.385	11.2793	491.236	10.4343	482.21	27.3805	493.385	11.2793	102.317
He8-JH16K61-Spot 38	338.887	34602	1.0984	17.2168	1.20922	0.646612	2.62679	0.0807761	2.33191	0.887742	500.754	11.2351	506.391	10.4742	532.912	26.4909	500.754	11.2351	93.9655
He8-JH16K61-Spot 66	325.893	14828.6	1.11159	17.3414	1.23743	0.646749	3.28094	0.0813779	3.03864	0.926149	504.342	14.741	506.476	13.0846	517.059	27.1659	504.342	14.741	97.5405
He8 JH16-k6-1 run2 11May17-Spot 138	114.719	56983.3	1.41056	17.2421	1.37111	0.656458	2.7871	0.0821268	2.42651	0.870624	508.805	11.8716	512.445	11.2157	529.693	30.0266	508.805	11.8716	96.0566
He8-JH16K61-Spot 67	213.262	42199.7	17.7968	16.5752	1.11364	0.689138	3.36527	0.0828804	3.17566	0.943658	513.293	15.6684	532.282	13.9418	615.454	24.0697	513.293	15.6684	83.4006
He8 JH16-k6-1 run2 11May17-Spot 128	977.19	179618	7.3323	17.1968	0.977664	0.669511	2.8669	0.0835397	2.69505	0.940057	517.216	13.3947	520.415	11.6743	535.426	21.4059	517.216	13.3947	96.5991
He8 JH16-k6-1 run2 11May17-Spot 73	423.934	343294	2.64974	17.0504	1.26606	0.679062	3.09891	0.08401	2.82848	0.912735	520.014	14.1309	526.207	12.7264	554.137	27.6043	520.014	14.1309	93.842
He8 JH16-k6-1 run2 11May17-Spot 84	209.354	24682.3	527.616	17.3279	1.78541	0.679315	3.21379	0.085409	2.67222	0.831485	528.328	13.555	526.36	13.2011	518.769	39.2059	528.328	13.555	101.843
He8 JH16-k6-1 run2 11May17-Spot 202	169.843	18592.1	0.646298	17.234	1.67471	0.689697	3.27631	0.0862445	2.81594	0.859486	533.288	14.4127	532.618	13.5797	530.723	36.6915	533.288	14.4127	100.483
He8 JH16-k6-1 run2 11May17-Spot 226	330.447	30765.6	0.723818	17.2985	1.14264	0.687733	2.7117	0.0863209	2.45921	0.906887	533.741	12.5971	531.438	11.2203	522.491	25.0536	533.741	12.5971	102.153
He8 JH16-k6-1 run2 11May17-Spot 219	1120.09	222130	8.76355	16.9323	1.17127	0.705026	3.03644	0.0866181	2.80145	0.922608	535.505	14.3957	541.788	12.7495	569.283	25.489	535.505	14.3957	94.0665
He8 JH16-k6-1 run2 11May17-Spot 107	341.779	69774	4.00098	17.2171	1.14907	0.701982	3.3608	0.0876947	3.15827	0.939735	541.889	16.4147	539.974	14.0758	532.871	25.1501	541.889	16.4147	101.692
He8 JH16-k6-1 run2 11May17-Spot 95	128.247	17350	0.606496	16.6434	1.46556	0.762628	3.27484	0.0920964	2.9286	0.894273	567.923	15.9207	575.525	14.388	606.575	31.7095	567.923	15.9207	93.6279
He8 JH16-k6-1 run2 11May17-Spot 231	231.86	33301.3	2.57287	16.8175	1.35338	0.770161	2.61646	0.0939791	2.23925	0.855831	579.027	12.4006	579.855	11.5593	584.024	29.3762	579.027	12.4006	99.1445
He8 JH16-k6-1 run2 11May17-Spot 259	742.541	215072	0.932048	16.9868	1.09358	0.771343	2.85493	0.0950705	2.63718	0.923728	585.455	14.7592	580.533	12.6239	562.248	23.8345	585.455	14.7592	104.128
He8 JH16-k6-1 run2 11May17-Spot 75	101.558	54477.9	0.933427	16.6583	1.47678	0.805156	2.60506	0.0973194	2.14604	0.823795	598.68	12.2694	599.733	11.7987	604.633	31.9709	598.68	12.2694	99.0155
He8-JH16K61-Spot 53	149.732	8692.43	3.50445	16.6986	1.53041	0.818606	3.02743	0.0991841	2.61213	0.862819	609.625	15.1944	607.27	13.8378	599.422	33.1387	609.625	15.1944	101.702
He8 JH16-k6-1 run2 11May17-Spot 238	185.371	12067.3	2.25265	16.3854	1.19915	0.842689	3.55513	0.100187	3.34679	0.941397	615.506	19.6469	620.628	16.5097	640.309	25.7927	615.506	19.6469	96.1264
He8 JH16-k6-1 run2 11May17-Spot 139	114.723	62353.5	0.598107	15.8695	0.999218	0.87021	3.18952	0.100202	3.02896	0.94966	615.592	17.7835	635.681	15.0703	708.682	21.2696	615.592	17.7835	86.8644
He8 JH16-k6-1 run2 11May17-Spot 224	291.38	22532.5	2.62022	16.6843	1.04644	0.830529	2.80971	0.100542	2.60758	0.928057	617.587	15.3567	613.906	12.9448	601.27	22.636	617.587	15.3567	102.714
He8 JH16-k6-1 run2 11May17-Spot 244	343.75	215366	1.85222	16.3206	1.22237	0.849895	2.7412	0.100644	2.45357	0.895071	618.183	14.463	624.591	12.7883	648.795	26.2719	618.183	14.463	95.2818
He8 JH16-k6-1 run2 11May17-Spot 85	171.112	68707.6	1.40151	16.5988	1.27309	0.836144	3.29171	0.100704	3.03555	0.922182	618.532	17.9033	617.015	15.2215	612.375	27.5074	618.532	17.9033	101.006
He8 JH16-k6-1 run2 11May17-Spot 100	294.513	28688	0.723071	16.6413	1.38561	0.837834	2.55913	0.101166	2.15156	0.84074	621.236	12.7425	617.95	11.8466	606.85	29.9669	621.236	12.7425	102.371
He8 JH16-k6-1 run2 11May17-Spot 169	237.221	75295.1	1.55747	16.6996	1.34585	0.843584	2.5219	0.102217	2.13276	0.845696	627.387	12.7502	621.122	11.7177	599.282	29.1343	627.387	12.7502	104.69
He8 JH16-k6-1 run2 11May17-Spot 268	114.229	47022.2	1.51296	16.0635	1.46839	0.879235	2.90795	0.102479	2.50998	0.863145	628.919	15.0402	640.57	13.8155	682.784	31.3512	628.919	15.0402	92.111
He8 JH16-k6-1 run2 11May17-Spot 129	112.96	23617.5	1.63158	16.3213	1.32376	0.866888	3.16722	0.102661	2.87731	0.908467	629.983	17.2691	633.876	14.9343	648.736	28.4404	629.983	17.2691	97.1094
He8 JH16-k6-1 run2 11May17-Spot 312	138.778	15286.6	1.86608	16.4044	1.16026	0.866773	2.7963	0.10317	2.54423	0.909855	632.962	15.3387	633.814	13.1841	637.811	24.9631	632.962	15.3387	99.2396
He8 JH16-k6-1 run2 11May17-Spot 177	537.113	142069	11.5731	16.3195	1.37424	0.871983	2.80137	0.103253	2.44113	0.871407	633.444	14.7278	636.643	13.2505	648.957	29.5127	633.444	14.7278	97.6095
He8 JH16-k6-1 run2 11May17-Spot 293	252.16	68710.4	1.22235	16.4783	1.36862	0.869661	3.83359	0.10398	3.58096	0.934101	637.691	21.7424	635.383	18.1079	628.101	29.4926	637.691	21.7424	101.527
He8 JH16-k6-1 run2 11May17-Spot 205	343.105	76088.5	4.47156	16.3839	1.10667	0.879057	2.73116	0.104501	2.4969	0.914227	640.735	15.2292	640.473	12.9741	640.506	23.8203	640.735	15.2292	100.036
He8-JH16K61-Spot 45	78.9497	39460.4	1.35514	15.8387	1.54852	0.909668	3.30443	0.104542	2.91914	0.883401	640.972	17.8108	656.881	15.9841	712.808	32.908	640.972	17.8108	89.9221
He8 JH16-k6-1 run2 11May17-Spot 264	448.149	154024	1.84446	16.5154	1.20488	0.87902	2.73718	0.105336	2.45773	0.897905	645.603	15.0985	640.453	13.0024	623.247	25.9966	645.603	15.0985	103.587
He8-JH16K61-Spot 41	298.217	11263.5	2.52962	16.1997	1.42385	0.906505	2.90861	0.106553	2.53627	0.871987	652.696	15.7437	655.198	14.0435	664.775	30.4947	652.696	15.7437	98.183
He8-JH16K61-Spot 13	126.191	15668.4	1.1023	16.2783	1.38706	0.903258	2.94369	0.106686	2.59641	0.882027	653.475	16.1353	653.467	14.1861	654.366	29.7824	653.475	16.1353	99.8639
He8 JH16-k6-1 run2 11May17-Spot 140	206.42	74204.1	191.267	16.4333	1.01914	0.896231	2.97499	0.106864	2.79498	0.939493	654.511	17.3955	649.711	14.2782	634.029	21.9614	654.511	17.3955	103.23
He8 JH16-k6-1 run2 11May17-Spot 284	335.02	108011	1.24505	15.9669	1.52709	0.934726	2.37144	0.108291	1.81431	0.765069	662.816	11.428	670.118	11.6339	695.673	32.5644	662.816	11.428	95.277
He8 JH16-k6-1 run2 11May17-Spot 105	186.274	22243.4	1.70846	16.3627	1.32986	0.91895	3.32913	0.109103	3.05198	0.91675	667.535	19.3538	661.805	16.1892	643.285	28.6079	667.535	19.3538	103.77
He8 JH16-k6-1 run2 11May17-Spot 88	451.563	102305	3.0319	14.8444	1.4114	1.06795	3.19719	0.115027	2.86879	0.897285	701.878	19.078	737.732	16.7667	849.068	29.3241	701.878	19.078	82.6645
He8 JH16-k6-1 run2 11May17-Spot 227	104.736	43209.7	0.994495	15.6681	1.32087	1.02971	3.01746	0.117063	2.713	0.899101	713.635	18.3278	718.78	15.5448	735.817	27.9604	713.635	18.3278	96.9854
He8 JH16-k6-1 run2 11May17-Spot 134	413.914	883857	0.945706	15.7936	1.11908	1.02428	2.88631	0.117378	2.66053	0.921777	715.454	18.0166	716.062	14.8304	718.874	23.7581	715.454	18.0166	99.5242
He8 JH16-k6-1 run2 11May17-Spot 292	221.11	23606.1	1.54715	15.6182	1.31561	1.07588	2.82297	0.121922	2.49767	0.884766	741.619	17.4975	741.621	14.8569	742.527	27.803	741.619	17.4975	99.8778
He8 JH16-k6-1 run2 11May17-Spot 118	172.489	71360.2	1.12092	15.413	1.48731	1.0925	3.30557	0.122179	2.95207	0.893059	743.096	20.7196	749.72	17.5257	770.437	31.313	743.096	20.7196	96.4512
He8 JH16-k6-1 run2 11May17-Spot 218	695.052	207722	6.91765	15.5299	1.07269	1.09653	3.18201	0.123559	2.99575	0.941465	751.017	21.2375	751.669	16.9001	754.51	22.6214	751.017	21.2375	99.537
He8 JH16-k6-1 run2 11May17-Spot 98	122.972	29649.4	0.681997	15.1934	1.2071	1.12329	2.50457	0.123832	2.19449	0.876194	752.584	15.5878	764.549	13.4546	800.575	25.2921	752.584	15.5878	94.0054
He8 JH16-k6-1 run2 11May17-Spot 196	106.894	61046.5	0.849933	15.4983	1.55408	1.10153	3.18271	0.12387	2.7775	0.872682	752.802	19.7344	754.088	16.9405	758.802	32.7806	752.802	19.7344	99.2093
He8-JH16K61-Spot 51	177.226	42389.2	0.945144	15.2956	1.26507	1.12133	3.12553	0.124448	2.85807	0.914426	756.114	20.3911	763.611	16.7771	786.509	26.5844	756.114	20.3911	96.1355
He8 JH16-k6-1 run2 11May17-Spot 266	624.093	101166	2.38122	15.2307	1.25606	1.17336	3.03239	0.129669	2.76002	0.91018	785.978	20.4229	788.214	16.6247	795.441	26.3584	785.978	20.4229	98.8103
He8-JH16K61-Spot 15	154.913	7805.29	1.27432	15.0956	1.71586	1.18579	3.577	0.129881	3.13859	0.877437	787.189	23.2578	794.007	19.7062	814.127	35.8943	787.189	23.2578	96.6911
He8 JH16-k6-1 run2 11May17-Spot 254	120.805	54294.6	1.51757	15.1859	1.37439	1.18056	2.94313	0.130082	2.60251	0.884267	788.332	19.3116	791.573	16.1806	801.604	28.7916	788.332	19.3116	98.3443
He8-JH16K61-Spot 46	208.578	28741.9	1.21608	14.5609	1.20899	1.23397	3.23617	0.130371	3.00185	0.927595	789.98	22.3187	816.145	18.1524	889.067	24.9593	789.98	22.3187	88.8549
He8 JH16-k6-1 run2 11May17-Spot 132	33.7442	7544.5	0.757998	15.377	1.5832	1.17412	3.16511	0.131	2.74069	0.865908	793.57	20.464	788.572	17.3576	775.357	33.3058	793.57	20.464	102.349
He8-JH16K61-Spot 7	402.79	36370.8	2.12265	15.153	1.18153	1.20781	3.32553	0.132797	3.10856	0.934756	803.801	23.4917	804.186	18.4747	806.145	24.7324	803.801	23.4917	99.7093
He8 JH16-k6-1 run2 11May17-Spot 142	176.343	71062.7	1.61214	14.9584	1.32833	1.25736	3.27369	0.136468	2.99208	0.913979	824.66	23.1616	826.721	18.5172	833.178	27.6874	824.66	23.1616	98.9776
He8 JH16-k6-1 run2 11May17-Spot 195	246.576	62716.8	2.17002	14.6173	1.40686	1.29761	3.09864	0.137625	2.76085	0.890989	831.216	21.5308	844.664	17.771	881.051	29.0823	831.216	21.5308	94.3438
He8-JH16K61-Spot 18	639.881	272485	2.00855	14.7859	1.36232	1.32161	3.02485	0.141788	2.7007	0.892839	854.763	21.6197	855.217	17.486	857.278	28.3059	854.763	21.6197	99.7066
He8-JH16K61-Spot 64	143.524	24643.9	2.16051	14.7012	1.19217	1.33085	3.29865	0.141962	3.07568	0.932407	855.745	24.648	859.25	19.1264	869.223	24.6918	855.745	24.648	98.4495
He8 JH16-k6-1 run2 11May17-Spot 216	259.137	19755.1	1.28551	14.9474	1.22838	1.31153	3.07383	0.142243	2.81772	0.916679	857.331	22.6198	850.797	17.7106	834.706	25.5978	857.331	22.6198	102.711
He8 JH16-k6-1 run2 11May17-Spot 93	111.973	2.74889e+06	1.30536	14.8067	1.17299	1.34498	3.02131	0.144498	2.78431	0.921559	870.05	22.6613	865.388	17.5973	854.378	24.3567	870.05	22.6613	101.834
He8 JH16-k6-1 run2 11May17-Spot 197	226.667	62347.1	1.78171	14.9146	1.33659	1.33678	2.74749	0.144663	2.40046	0.873694	870.976	19.5566	861.829	15.9604	839.262	27.8316	870.976	19.5566	103.779
He8-JH16K61-Spot 40	146.805	15133	1.16506	14.5921	1.21322	1.38351	2.92103	0.146484	2.65716	0.909666	881.223	21.8857	881.937	17.2176	884.633	25.0828	881.223	21.8857	99.6146
He8 JH16-k6-1 run2 11May17-Spot 101	328.793	84211.4	1.86693	14.7073	1.12242	1.39236	3.05995	0.148584	2.84665	0.930295	893.023	23.7391	885.701	18.0849	868.357	23.2549	893.023	23.7391	102.84
He8 JH16-k6-1 run2 11May17-Spot 96	281.296	456569	1.72538	14.5328	0.971187	1.44274	2.88412	0.152134	2.71569	0.941599	912.912	23.1165	906.861	17.298	893.031	20.052	893.031	20.052	102.226
He8-JH16K61-Spot 6	113.268	11625.1	1.22272	14.3942	1.22523	1.44775	3.18456	0.151206	2.93943	0.923025	907.721	24.8885	908.939	19.1275	912.776	25.2131	912.776	25.2131	99.4462
He8 JH16-k6-1 run2 11May17-Spot 247	370.275	78855.4	1.35897	14.345	1.0576	1.46353	2.87606	0.152332	2.67455	0.929935	914.021	22.7921	915.465	17.3506	919.863	21.7643	919.863	21.7643	99.3649
He8-JH16K61-Spot 52	191.135	37206.3	1.58482	14.266	1.21011	1.45619	3.25719	0.150732	3.02405	0.928425	905.068	25.5354	912.434	19.6102	931.173	24.8369	931.173	24.8369	97.1965
He8 JH16-k6-1 run2 11May17-Spot 111	205.495	22385.7	1.2976	14.1888	1.35181	1.43574	3.00403	0.147812	2.68269	0.89303	888.686	22.2705	903.946	17.9815	942.302	27.6853	942.302	27.6853	94.3101
He8 JH16-k6-1 run2 11May17-Spot 220	626.078	1.36999e+06	2.09308	14.1719	1.2349	1.45204	3.13997	0.149312	2.88694	0.919417	897.104	24.1776	910.719	18.8824	944.744	25.2787	944.744	25.2787	94.9574
He8-JH16K61-Spot 60	803.167	172707	11.8825	14.1654	1.30668	1.49344	3.31032	0.153499	3.04151	0.918798	920.545	26.0914	927.717	20.1347	945.686	26.7402	945.686	26.7402	97.3415
He8 JH16-k6-1 run2 11May17-Spot 194	105.737	63678	1.35257	14.1015	1.0979	1.59556	2.80573	0.163255	2.582	0.92026	974.841	23.3597	968.474	17.5146	954.925	22.457	954.925	22.457	102.086
He8 JH16-k6-1 run2 11May17-Spot 117	84.3124	32916.1	1.47151	14.0765	1.06801	1.43682	3.03678	0.146752	2.84278	0.936116	882.733	23.4519	904.397	18.1831	958.559	21.809	958.559	21.809	92.0896
He8 JH16-k6-1 run2 11May17-Spot 242	271.484	52117.9	1.56206	14.0238	1.48585	1.5488	3.53266	0.157597	3.20498	0.907244	943.41	28.1279	950.015	21.8001	966.257	30.3343	966.257	30.3343	97.6356
He8 JH16-k6-1 run2 11May17-Spot 190	305.428	54571.5	0.990638	13.9229	1.24001	1.61	2.87032	0.162646	2.58865	0.901868	971.466	23.3448	974.109	17.9801	980.978	25.2567	980.978	25.2567	99.0303
He8 JH16-k6-1 run2 11May17-Spot 243	687.874	22485.4	1.4732	13.9168	1.67533	1.38426	3.12807	0.13978	2.64161	0.844485	843.419	20.884	882.256	18.4425	981.875	34.1194	981.875	34.1194	85.8988
He8-JH16K61-Spot 47	166.936	18056.9	1.25311	13.8833	1.09688	1.56155	2.97011	0.157302	2.76015	0.929308	941.767	24.1847	955.081	18.3867	986.781	22.3023	986.781	22.3023	95.4384
He8 JH16-k6-1 run2 11May17-Spot 288	428.676	100858	3.75249	13.7542	0.949356	1.66843	2.93854	0.166506	2.78096	0.946375	992.831	25.5893	996.587	18.6579	1005.72	19.2445	1005.72	19.2445	98.7181
He8 JH16-k6-1 run2 11May17-Spot 136	97.5693	22779	1.04855	13.6939	1.08657	1.6892	2.80843	0.167839	2.58972	0.922124	1000.2	23.993	1004.46	17.9141	1014.64	22.003	1014.64	22.003	98.5765
He8 JH16-k6-1 run2 11May17-Spot 143	88.8958	72977.5	1.42415	13.6257	1.12144	1.76072	2.47938	0.174074	2.21127	0.891864	1034.52	21.135	1031.11	16.0575	1024.75	22.7086	1024.75	22.7086	100.954
He8 JH16-k6-1 run2 11May17-Spot 251	50.4371	70199.9	2.02558	13.5957	1.28322	1.74063	3.2673	0.17171	3.00476	0.919647	1021.53	28.3861	1023.7	21.0735	1029.21	25.9647	1029.21	25.9647	99.2536
He8 JH16-k6-1 run2 11May17-Spot 309	337.071	67940.7	5.71803	13.5887	1.22951	1.54452	3.42724	0.152286	3.19911	0.933435	913.763	27.2551	948.307	21.1264	1030.24	24.8751	1030.24	24.8751	88.6944
He8-JH16K61-Spot 42	316.413	41737.5	1.99159	13.5402	1.12274	1.8363	2.17062	0.180409	1.8577	0.855839	1069.21	18.3029	1058.54	14.2704	1037.46	22.6911	1037.46	22.6911	103.06
He8 JH16-k6-1 run2 11May17-Spot 283	119.378	83105.8	2.57317	13.5352	1.23641	1.73708	3.45114	0.170597	3.22206	0.933622	1015.4	30.2705	1022.38	22.243	1038.21	24.9847	1038.21	24.9847	97.8031
He8 JH16-k6-1 run2 11May17-Spot 145	486.395	234002	2.3306	13.5141	1.19379	1.74927	2.99109	0.171527	2.74254	0.916902	1020.52	25.8853	1026.89	19.3264	1041.35	24.1116	1041.35	24.1116	97.9993
He8 JH16-k6-1 run2 11May17-Spot 250	206.373	34672.3	2.19127	13.4922	1.28651	1.72688	3.19553	0.169056	2.92511	0.915378	1006.91	27.2684	1018.59	20.5507	1044.63	25.9712	1044.63	25.9712	96.389
He8 JH16-k6-1 run2 11May17-Spot 116	184.278	86364	1.38245	13.3046	1.30415	1.8651	2.91962	0.18005	2.61216	0.894692	1067.25	25.6929	1068.8	19.3006	1072.85	26.188	1072.85	26.188	99.4774
He8 JH16-k6-1 run2 11May17-Spot 126	96.6555	428261	0.64374	13.2936	1.27155	1.5073	3.00815	0.145389	2.72619	0.906268	875.063	22.3077	933.346	18.3641	1074.51	25.5238	1074.51	25.5238	81.4384
He8-JH16K61-Spot 39	52.3479	31010.1	2.76433	13.1221	1.20657	1.85037	2.97572	0.176178	2.72013	0.914107	1046.06	26.2656	1063.56	19.617	1100.53	24.1179	1100.53	24.1179	95.0501
He8 JH16-k6-1 run2 11May17-Spot 152	169.993	40917.2	0.742252	13.0938	1.56522	1.73936	3.41139	0.16525	3.03112	0.888529	985.888	27.7107	1023.23	21.9973	1104.82	31.2922	1104.82	31.2922	89.2349
He8 JH16-k6-1 run2 11May17-Spot 182	61.8747	21036.1	1.59805	13.0492	1.28617	1.94436	2.8037	0.184097	2.49129	0.888571	1089.32	24.9692	1096.5	18.8017	1111.64	25.7036	1111.64	25.7036	97.9923
He8 JH16-k6-1 run2 11May17-Spot 123	134.302	68895.7	1.27032	12.7291	1.23858	2.14815	3.1326	0.198404	2.87735	0.918516	1166.74	30.7086	1164.46	21.7076	1161.06	24.5558	1161.06	24.5558	100.489
He8 JH16-k6-1 run2 11May17-Spot 114	93.8076	85522.3	0.711455	12.6822	1.23216	2.12101	3.09277	0.195176	2.83672	0.917211	1149.35	29.8629	1155.67	21.3446	1168.36	24.4038	1168.36	24.4038	98.3728
He8 JH16-k6-1 run2 11May17-Spot 240	911.683	21321.8	16.4494	12.6377	1.51106	1.71848	3.21238	0.15758	2.83479	0.88246	943.315	24.8767	1015.46	20.6222	1175.36	29.8774	1175.36	29.8774	80.2574
He8 JH16-k6-1 run2 11May17-Spot 155	53.5007	145789	0.778942	12.6027	1.33115	2.11815	3.05282	0.19369	2.74732	0.899927	1141.34	28.7373	1154.74	21.0598	1180.86	26.3339	1180.86	26.3339	96.6533
He8-JH16K61-Spot 63	901.211	62878.5	1.1226	12.4921	1.45252	2.28244	3.5736	0.206882	3.26509	0.913669	1212.19	36.0808	1206.87	25.2365	1198.25	28.6438	1198.25	28.6438	101.163
He8 JH16-k6-1 run2 11May17-Spot 149	612.143	190471	1.43582	12.3837	1.22652	2.22904	2.14904	0.200288	1.76466	0.821138	1176.87	18.9824	1190.22	15.0644	1215.42	24.1176	1215.42	24.1176	96.828
He8 JH16-k6-1 run2 11May17-Spot 308	116.265	39960.1	1.26672	12.146	0.859213	2.56146	2.40564	0.225741	2.24697	0.934041	1312.14	26.6765	1289.71	17.5697	1253.39	16.7923	1253.39	16.7923	104.687
He8-JH16K61-Spot 20	175.891	123087	1.15507	11.8009	0.979311	2.64359	3.21356	0.226358	3.06071	0.952435	1315.38	36.4185	1312.86	23.6788	1309.56	19.0056	1309.56	19.0056	100.444
He8 JH16-k6-1 run2 11May17-Spot 230	204.228	37522.1	0.641467	11.2664	0.974117	2.7407	3.15733	0.224045	3.00331	0.951216	1303.21	35.4372	1339.57	23.4929	1398.95	18.6714	1398.95	18.6714	93.1562
He8 JH16-k6-1 run2 11May17-Spot 287	394.571	136205	2.05749	11.1045	1.18714	2.97088	3.47058	0.239371	3.26123	0.939679	1383.43	40.6047	1400.2	26.3711	1426.65	22.6694	1426.65	22.6694	96.9706
He8 JH16-k6-1 run2 11May17-Spot 217	184.578	41227.2	1.48245	11.0607	0.975069	2.89666	2.88642	0.23247	2.71674	0.941214	1347.43	33.034	1381.04	21.7902	1434.19	18.6005	1434.19	18.6005	93.9506
He8-JH16K61-Spot 57	72.5683	8807.38	0.744116	10.8714	1.32965	3.33638	2.6492	0.263177	2.29135	0.864923	1506.07	30.7749	1489.61	20.6992	1467.05	25.2528	1467.05	25.2528	102.66
He8-JH16K61-Spot 25	111.406	11791.3	1.35409	10.7356	1.17827	3.41138	2.37672	0.265732	2.06409	0.868463	1519.1	27.9353	1507.02	18.6643	1490.88	22.3063	1490.88	22.3063	101.893
He8 JH16-k6-1 run2 11May17-Spot 92	385.506	180724	2.54603	10.6565	1.1785	3.34782	3.08283	0.25886	2.84868	0.924047	1484.01	37.762	1492.28	24.1075	1504.86	22.2676	1504.86	22.2676	98.6143
He8 JH16-k6-1 run2 11May17-Spot 280	582.228	3.8717e+06	13.8768	10.3991	1.29721	3.40813	3.25393	0.257158	2.98418	0.9171	1475.29	39.3513	1506.27	25.55	1550.92	24.3618	1550.92	24.3618	95.1233
He8 JH16-k6-1 run2 11May17-Spot 257	186.204	72456.8	1.7775	9.69039	1.26329	3.79815	2.42483	0.267055	2.06976	0.853569	1525.84	28.122	1592.35	19.4923	1682.35	23.3233	1682.35	23.3233	90.6968
He8 JH16-k6-1 run2 11May17-Spot 306	90.8499	240204	2.13635	9.67879	1.50847	4.23541	2.66479	0.297443	2.19673	0.824355	1678.62	32.465	1680.91	21.893	1684.56	27.8432	1684.56	27.8432	99.6472
He8 JH16-k6-1 run2 11May17-Spot 122	67.8594	70351	2.00824	9.64458	1.19701	4.11043	2.35299	0.287646	2.02577	0.860934	1629.76	29.1725	1656.38	19.2191	1691.09	22.0765	1691.09	22.0765	96.373
He8 JH16-k6-1 run2 11May17-Spot 204	831.211	262452	1.78753	9.57275	1.06146	4.16125	2.70618	0.289034	2.48932	0.919865	1636.7	35.9822	1666.42	22.1577	1704.86	19.5422	1704.86	19.5422	96.0016
He8 JH16-k6-1 run2 11May17-Spot 115	122.367	86819.6	4.8055	9.51869	1.07241	4.3859	2.80277	0.302917	2.58949	0.923903	1705.76	38.8101	1709.69	23.1789	1715.29	19.718	1715.29	19.718	99.4445
He8-JH16K61-Spot 48	349.528	32769.2	1.49228	9.47548	1.00919	3.9749	2.8844	0.273285	2.70209	0.936795	1557.45	37.3864	1629.09	23.4048	1723.65	18.5358	1723.65	18.5358	90.3579
He8-JH16K61-Spot 9	601.896	49987.6	1.80539	9.43095	1.05932	4.29617	2.65901	0.293984	2.43889	0.917217	1661.41	35.7199	1692.63	21.9047	1732.3	19.4357	1732.3	19.4357	95.9079
He8 JH16-k6-1 run2 11May17-Spot 163	145.754	48106.4	1.32894	9.38188	1.17397	4.40713	2.57214	0.300009	2.2886	0.889766	1691.35	34.047	1713.68	21.29	1741.86	21.5137	1741.86	21.5137	97.1002
He8 JH16-k6-1 run2 11May17-Spot 148	137.937	37850	1.13409	9.28815	1.18201	4.5224	2.56434	0.30478	2.27567	0.887431	1714.97	34.2674	1735.1	21.326	1760.24	21.6097	1760.24	21.6097	97.4282
He8-JH16K61-Spot 26	30.4514	112863	1.75742	9.21977	0.965026	4.79846	2.91446	0.321004	2.75006	0.94359	1794.63	43.0797	1784.63	24.4941	1773.74	17.6142	1773.74	17.6142	101.178
He8 JH16-k6-1 run2 11May17-Spot 193	86.0819	25259.9	1.14647	9.21813	1.28753	4.90241	3.22614	0.327899	2.95808	0.91691	1828.19	47.088	1802.67	27.2143	1774.06	23.5009	1774.06	23.5009	103.051
He8-JH16K61-Spot 16	216.734	18984.2	1.87392	9.17713	1.01722	4.89087	3.16265	0.325672	2.9946	0.946863	1817.37	47.4252	1800.68	26.6678	1782.19	18.5477	1782.19	18.5477	101.974
He8-JH16K61-Spot 56	676.262	103893	16.9793	9.16162	0.960826	3.73165	3.34382	0.248062	3.20281	0.957828	1428.47	41.0373	1578.18	26.7832	1785.28	17.5126	1785.28	17.5126	80.0142
He8-JH16K61-Spot 65	810.475	808025	6.1823	9.05	1.09853	5.15428	2.68451	0.338458	2.44945	0.91244	1879.25	39.9294	1845.1	22.8327	1807.59	19.9679	1807.59	19.9679	103.964
He8 JH16-k6-1 run2 11May17-Spot 282	324.021	139471	2.17881	8.97664	1.15669	4.84102	2.41215	0.31531	2.11673	0.877528	1766.79	32.7113	1792.06	20.3021	1822.37	20.9873	1822.37	20.9873	96.95
He8-JH16K61-Spot 4	1035.62	267571	8.1861	8.94201	1.30031	4.75173	3.0957	0.308301	2.80937	0.907507	1732.34	42.6777	1776.41	25.9739	1829.38	23.5734	1829.38	23.5734	94.6956
He8 JH16-k6-1 run2 11May17-Spot 80	468.034	277812	1.22702	8.93331	1.07886	5.15777	3.47031	0.33432	3.29834	0.950448	1859.29	53.2753	1845.68	29.5229	1831.14	19.5541	1831.14	19.5541	101.537
He8 JH16-k6-1 run2 11May17-Spot 130	342.848	105769	6.43715	8.91609	1.05706	5.06043	2.93779	0.327378	2.74102	0.933024	1825.66	43.5805	1829.5	24.9127	1834.64	19.1507	1834.64	19.1507	99.5105
He8 JH16-k6-1 run2 11May17-Spot 285	179.417	196162	2.38117	8.9022	1.44521	4.98895	3.04922	0.322251	2.68498	0.880546	1800.71	42.1838	1817.45	25.7971	1837.46	26.1733	1837.46	26.1733	98
He8 JH16-k6-1 run2 11May17-Spot 181	366.157	1.59459e+06	1.82693	8.89996	1.07775	5.12517	2.80766	0.330967	2.59257	0.923391	1843.07	41.5597	1840.29	23.8586	1837.92	19.5178	1837.92	19.5178	100.28
He8 JH16-k6-1 run2 11May17-Spot 90	376.56	150603	3.95606	8.89858	0.954064	5.10683	2.67787	0.329731	2.50215	0.93438	1837.08	39.9975	1837.24	22.7419	1838.2	17.2769	1838.2	17.2769	99.939
He8 JH16-k6-1 run2 11May17-Spot 213	252.942	1.19317e+06	1.918	8.89056	1.16226	5.12695	2.67998	0.330732	2.41484	0.901066	1841.93	38.6899	1840.58	22.7745	1839.83	21.0437	1839.83	21.0437	100.114
He8 JH16-k6-1 run2 11May17-Spot 133	657.075	718276	14.0422	8.86483	1.23137	4.68232	2.99004	0.301175	2.72471	0.911264	1697.13	40.6563	1764.09	25.0225	1845.08	22.2809	1845.08	22.2809	91.9816
He8 JH16-k6-1 run2 11May17-Spot 99	474.539	460900	6.57209	8.80838	1.29927	5.26209	2.86801	0.336312	2.55683	0.891499	1868.9	41.482	1862.73	24.4756	1856.63	23.4769	1856.63	23.4769	100.661
He8 JH16-k6-1 run2 11May17-Spot 159	437.37	4.94536e+06	3.43412	8.80117	1.15824	4.6305	2.90619	0.295703	2.66542	0.917151	1669.97	39.2138	1754.78	24.2727	1858.11	20.9243	1858.11	20.9243	89.8746
He8 JH16-k6-1 run2 11May17-Spot 135	295.07	258087	4.95519	8.77171	1.20255	5.22614	2.92192	0.332624	2.66299	0.911382	1851.09	42.8489	1856.89	24.9085	1864.16	21.7091	1864.16	21.7091	99.2985
He8 JH16-k6-1 run2 11May17-Spot 237	384.362	138608	0.777236	8.76113	1.1379	5.05625	2.8363	0.321423	2.59803	0.915994	1796.67	40.7383	1828.8	24.0485	1866.34	20.5365	1866.34	20.5365	96.2673
He8-JH16K61-Spot 44	541.876	119063	5.53848	8.74475	0.769066	5.29354	2.30746	0.335878	2.17553	0.942823	1866.81	35.2616	1867.82	19.7093	1869.72	13.8753	1869.72	13.8753	99.8444
He8-JH16K61-Spot 10	668.34	5.37483e+06	12.5025	8.73111	0.999342	5.15502	2.95311	0.326578	2.77888	0.941001	1821.78	44.1011	1845.22	25.1188	1872.53	18.022	1872.53	18.022	97.2893
He8 JH16-k6-1 run2 11May17-Spot 184	302.797	72803.7	1.782	8.73041	1.26631	5.24364	2.79753	0.332166	2.49452	0.891687	1848.87	40.0966	1859.74	23.8605	1872.68	22.835	1872.68	22.835	98.7289
He8 JH16-k6-1 run2 11May17-Spot 258	179.959	119480	2.21116	8.7276	1.40573	5.42686	3.14899	0.343662	2.81781	0.89483	1904.26	46.46	1889.11	27.0056	1873.26	25.3481	1873.26	25.3481	101.655
He8-JH16K61-Spot 30	181.459	98848	1.81136	8.7263	1.42682	5.21535	2.55149	0.330219	2.11524	0.829024	1839.44	33.8502	1855.13	21.7424	1873.53	25.7277	1873.53	25.7277	98.1806
He8 JH16-k6-1 run2 11May17-Spot 303	158.901	86746.6	2.05055	8.67373	1.39065	5.31514	3.28205	0.334509	2.97287	0.905796	1860.2	48.0384	1871.3	28.0555	1884.42	25.0445	1884.42	25.0445	98.7149
He8 JH16-k6-1 run2 11May17-Spot 141	578.461	356453	2.01374	8.64802	1.19715	5.04433	2.37161	0.316525	2.04728	0.863246	1772.74	31.7306	1826.8	20.0995	1889.76	21.5453	1889.76	21.5453	93.8074
He8 JH16-k6-1 run2 11May17-Spot 192	427.159	215524	5.85579	8.63677	1.01944	5.23056	2.48537	0.327784	2.26667	0.912006	1827.63	36.072	1857.61	21.1887	1892.1	18.3414	1892.1	18.3414	96.5927
He8 JH16-k6-1 run2 11May17-Spot 102	273.26	149799	4.58563	8.60784	0.97217	5.4613	2.35287	0.341097	2.14263	0.910647	1891.94	35.1308	1894.53	20.1958	1898.13	17.4782	1898.13	17.4782	99.6739
He8 JH16-k6-1 run2 11May17-Spot 208	90.5862	96114.4	3.66159	8.60773	1.30737	5.11952	2.84914	0.319746	2.53148	0.888507	1788.49	39.5379	1839.35	24.2068	1898.16	23.5056	1898.16	23.5056	94.2224
He8 JH16-k6-1 run2 11May17-Spot 165	278.121	118349	2.30109	8.37744	1.14472	5.78924	2.97726	0.351901	2.7484	0.92313	1943.67	46.1191	1944.8	25.7834	1946.77	20.4605	1946.77	20.4605	99.8407
He8 JH16-k6-1 run2 11May17-Spot 239	97.1743	78682.5	1.02747	8.37314	1.00685	5.84228	3.32055	0.354943	3.16423	0.952922	1958.16	53.4359	1952.7	28.7964	1947.69	17.9956	1947.69	17.9956	100.538
He8 JH16-k6-1 run2 11May17-Spot 70	51.5978	31583.7	2.09443	8.32558	1.08046	6.06721	2.80183	0.366514	2.58512	0.922655	2012.98	44.6975	1985.55	24.4285	1957.87	19.2885	1957.87	19.2885	102.815
He8 JH16-k6-1 run2 11May17-Spot 214	745.356	36527.9	1.87739	8.30015	1.25882	5.31516	4.26125	0.320103	4.07107	0.95537	1790.23	63.6389	1871.3	36.4322	1963.33	22.4587	1963.33	22.4587	91.1837
He8 JH16-k6-1 run2 11May17-Spot 229	42.9932	213712	0.559014	8.27873	1.30106	5.63296	2.71862	0.338367	2.38708	0.878048	1878.81	38.9048	1921.16	23.4468	1967.93	23.1999	1967.93	23.1999	95.4714
He8 JH16-k6-1 run2 11May17-Spot 314	91.7082	225516	1.04644	8.26861	1.34047	6.03629	3.00422	0.362152	2.68858	0.894936	1992.36	46.0801	1981.09	26.1748	1970.11	23.8967	1970.11	23.8967	101.13
He8 JH16-k6-1 run2 11May17-Spot 236	153.512	274757	5.80606	8.23755	1.26344	5.95981	3.03655	0.35622	2.76123	0.909329	1964.23	46.7537	1970	26.4085	1976.82	22.5057	1976.82	22.5057	99.3633
He8 JH16-k6-1 run2 11May17-Spot 183	311.92	157335	11.2972	8.18685	1.17547	5.05299	2.98084	0.30016	2.73928	0.918963	1692.1	40.7678	1828.25	25.2718	1987.81	20.9116	1987.81	20.9116	85.124
He8 JH16-k6-1 run2 11May17-Spot 207	407.691	844178	1.86945	7.89575	1.25984	6.53312	2.69228	0.374285	2.37932	0.883756	2049.53	41.7736	2050.37	23.7123	2051.97	22.2455	2051.97	22.2455	99.8809
He8 JH16-k6-1 run2 11May17-Spot 179	463.635	992241	1.23309	7.88241	1.38938	6.48166	3.50114	0.370709	3.21366	0.917889	2032.74	56.0296	2043.41	30.8079	2054.96	24.5251	2054.96	24.5251	98.9186
He8 JH16-k6-1 run2 11May17-Spot 71	83.8706	74383.9	1.23139	7.79637	1.31401	6.78776	3.15223	0.383978	2.8653	0.908976	2094.84	51.2478	2084.13	27.9043	2074.31	23.1454	2074.31	23.1454	100.99
He8-JH16K61-Spot 14	505.707	225537	1.7311	7.72553	1.23942	6.71801	2.42104	0.376579	2.07973	0.859023	2060.28	36.6763	2074.99	21.4009	2090.37	21.7895	2090.37	21.7895	98.5605
He8 JH16-k6-1 run2 11May17-Spot 164	201.7	24219.8	0.873173	7.72209	1.04861	6.53284	2.41641	0.366037	2.17703	0.900936	2010.73	37.6054	2050.34	21.2817	2091.16	18.4346	2091.16	18.4346	96.1538
He8 JH16-k6-1 run2 11May17-Spot 174	378.263	146340	6.16312	7.7169	0.968293	5.63794	2.24652	0.315683	2.02713	0.902342	1768.61	31.3547	1921.92	19.3767	2092.34	17.0224	2092.34	17.0224	84.528
He8 JH16-k6-1 run2 11May17-Spot 245	506.155	659626	1.41541	6.5445	1.10509	8.99363	3.03615	0.42707	2.82789	0.931408	2292.49	54.5563	2337.36	27.7506	2377.49	18.8351	2377.49	18.8351	96.425
He8 JH16-k6-1 run2 11May17-Spot 278	297.671	878230	1.35302	6.45942	1.21988	8.84858	3.99271	0.414719	3.8018	0.952183	2236.46	71.8471	2322.51	36.4405	2399.76	20.7445	2399.76	20.7445	93.1951
He8-JH16K61-Spot 55	523.159	83882.6	1.32522	6.42954	1.17735	9.03672	2.69076	0.421579	2.41952	0.899194	2267.64	46.2554	2341.73	24.6042	2407.64	20.0047	2407.64	20.0047	94.1851
He8 JH16-k6-1 run2 11May17-Spot 187	216.121	340976	1.12902	6.33994	0.918396	9.45444	2.21069	0.43492	2.01089	0.909623	2327.86	39.2911	2383.13	20.3025	2431.46	15.5661	2431.46	15.5661	95.7392
He8 JH16-k6-1 run2 11May17-Spot 125	595.735	480148	1.00098	6.26396	1.07005	9.6527	2.98176	0.438718	2.78314	0.933389	2344.9	54.7109	2402.21	27.4408	2451.88	18.0995	2451.88	18.0995	95.637
He8-JH16K61-Spot 21	190.949	519205	2.17527	6.21903	1.11938	9.32063	3.70286	0.420587	3.52961	0.953212	2263.14	67.3673	2370.05	33.9679	2464.04	18.9108	2464.04	18.9108	91.8468
He8 JH16-k6-1 run2 11May17-Spot 223	144.649	64620.8	1.62452	6.18398	1.08761	10.5851	2.92834	0.474953	2.71888	0.92847	2505.24	56.4406	2487.4	27.1738	2473.58	18.3563	2473.58	18.3563	101.28
He8-JH16K61-Spot 37	189.318	24012.8	0.984363	6.16045	1.03225	10.4311	3.57167	0.46626	3.41925	0.957326	2467.14	70.0944	2473.81	33.1052	2480.02	17.4107	2480.02	17.4107	99.4808
He8 JH16-k6-1 run2 11May17-Spot 294	839.569	428074	7.90339	6.12913	1.10298	10.5629	2.55333	0.469752	2.30281	0.901885	2482.47	47.447	2485.45	23.6882	2488.61	18.5906	2488.61	18.5906	99.7533
He8 JH16-k6-1 run2 11May17-Spot 127	115.6	4.4632e+06	0.848896	6.11131	1.22198	10.4533	3.44706	0.463526	3.22319	0.935056	2455.11	65.8102	2475.78	31.9554	2493.52	20.5835	2493.52	20.5835	98.4596
He8-JH16K61-Spot 19	461.065	89014.3	4.12158	6.10539	1.12494	9.6738	3.8968	0.428547	3.73089	0.957424	2299.16	72.1526	2404.22	35.8754	2495.15	18.9456	2495.15	18.9456	92.1453
He8-JH16K61-Spot 59	59.8322	37278.2	1.35001	6.09182	1.11286	10.6897	2.92805	0.472499	2.70833	0.924958	2494.51	56.0242	2496.53	27.1941	2498.9	18.735	2498.9	18.735	99.8244
He8 JH16-k6-1 run2 11May17-Spot 228	418.256	99825.9	60.3992	5.93147	1.3889	8.8143	2.8694	0.379348	2.51086	0.875046	2073.24	44.5155	2318.97	26.1725	2543.7	23.2799	2543.7	23.2799	81.5046
He8-JH16K61-Spot 12	139.997	34849.4	8.16548	5.90874	0.993366	11.1061	2.59748	0.476153	2.40002	0.923982	2510.49	49.9065	2532.07	24.2003	2550.14	16.6384	2550.14	16.6384	98.4451
He8 JH16-k6-1 run2 11May17-Spot 89	550.954	45353.3	1.8561	5.75584	1.30782	10.6644	3.20609	0.445382	2.92722	0.913018	2374.69	58.148	2494.33	29.7717	2593.96	21.8133	2593.96	21.8133	91.547
He8 JH16-k6-1 run2 11May17-Spot 281	161.541	451968	1.80302	5.65318	1.09569	10.534	3.30424	0.432088	3.11728	0.943419	2315.12	60.6331	2482.91	30.6511	2623.93	18.2216	2623.93	18.2216	88.2311
He8-JH16K61-Spot 28	294.133	3.06241e+06	1.4465	5.42435	1.11103	13.2467	2.7519	0.521366	2.51765	0.914877	2704.97	55.6204	2697.39	25.9867	2692.42	18.3572	2692.42	18.3572	100.466
He8 JH16-k6-1 run2 11May17-Spot 150	91.1278	644726	1.60321	5.3688	1.19824	13.1394	3.04745	0.511846	2.802	0.919456	2664.51	61.1549	2689.71	28.7626	2709.41	19.7703	2709.41	19.7703	98.3425
He8 JH16-k6-1 run2 11May17-Spot 154	331.104	160783	4.13283	4.89785	1.3399	14.7996	3.68956	0.525948	3.43766	0.931727	2724.36	76.3845	2802.44	35.106	2859.82	21.8071	2859.82	21.8071	95.2631
He8-JH16K61-Spot 34	184.496	60134.1	1.2183	4.00542	1.254	21.4999	2.78022	0.624845	2.48134	0.892501	3129.17	61.5147	3161.41	26.9815	3182.61	19.8605	3182.61	19.8605	98.3208
He8 JH16-k6-1 run2 11May17-Spot 109	213.498	284399	1.79496	3.9611	1.3207	19.2005	3.09551	0.551842	2.79963	0.904417	2832.83	64.1801	3051.94	29.8839	3200.22	20.8823	3200.22	20.8823	88.5198
Notes: see Table S5a

## Sheet: I3
Table S5h. U-Pb geochronologic analyses.		JHPM16-I3*
							Isotope ratios						Apparent ages (Ma)
Analysis	U	206Pb	U/Th	206Pb*	±	207Pb*	±	206Pb*	±	error	206Pb*	±	207Pb*	±	206Pb*	±	Best age	±	Conc
	(ppm)	204Pb		207Pb*	(%)	235U*	(%)	238U	(%)	corr.	238U*	(Ma)	235U	(Ma)	207Pb*	(Ma)	(Ma)	(Ma)	(%)
He9-JH16I3-May7-correct-Spot 265	2436.57	1609.97	2.22493	12.9433	1.02672	0.279946	2.51903	0.0262909	2.30029	0.913166	167.292	3.79871	250.614	5.59434	1127.93	20.4457	167.292	3.79871	NA
He9-JH16I3-May7-correct-Spot 289	682.925	37728.4	1.56494	18.506	1.11328	0.271178	2.93494	0.0364128	2.7156	0.925265	230.56	6.15043	243.635	6.35745	372.553	25.0541	230.56	6.15043	NA
He9-JH16I3-May7-correct-Spot 120	83.7565	11098.2	1.33029	19.4165	1.75287	0.262665	3.08207	0.0370051	2.53508	0.822524	234.242	5.83163	236.812	6.51017	263.391	40.236	234.242	5.83163	NA
He9-JH16I3-May7-correct-Spot 124	256.216	19697.9	0.919568	19.068	1.54812	0.272201	2.92663	0.0376602	2.48365	0.848637	238.313	5.81079	244.452	6.35824	304.834	35.3006	238.313	5.81079	NA
He9-JH16I3-May7-correct-Spot 232	297.16	8488.22	2.42351	19.4395	1.91187	0.267026	3.1689	0.0376639	2.5272	0.797498	238.337	5.91325	240.313	6.78131	260.694	43.9268	238.337	5.91325	NA
He9-JH16I3-May7-correct-Spot 33	425.038	12297.1	2.56223	20.3917	1.66529	0.256039	2.71056	0.0378834	2.13867	0.789016	239.7	5.03226	231.47	5.61044	149.7	39.0336	239.7	5.03226	NA
He9-JH16I3-May7-correct-Spot 276	398.567	6003.76	1.47033	20.0843	1.35955	0.261321	2.94794	0.0380818	2.61572	0.887304	240.932	6.18579	235.731	6.20158	185.19	31.6603	240.932	6.18579	NA
He9-JH16I3-May7-correct-Spot 192	782.875	12166.5	1.89123	18.6702	2.29177	0.281353	3.92929	0.0381142	3.19173	0.812291	241.134	7.55417	251.73	8.76069	352.633	51.7639	241.134	7.55417	NA
He9-JH16I3-May7-correct-Spot 36	418.616	40570.4	1.86669	18.7222	1.1633	0.280998	3.0667	0.0381722	2.8375	0.92526	241.494	6.72561	251.449	6.83067	346.385	26.2919	241.494	6.72561	NA
He9-JH16I3-May7-correct-Spot 118	179.722	3377.3	2.30143	20.0343	4.58422	0.262704	4.8617	0.0381882	1.61897	0.333005	241.593	3.83894	236.844	10.2707	191.03	106.658	241.593	3.83894	NA
He9-JH16I3-May7-correct-Spot 281	420.491	110834	2.08416	19.2992	1.211	0.273156	2.87957	0.0382505	2.61255	0.90727	241.98	6.20466	245.214	6.27325	277.309	27.7374	241.98	6.20466	NA
He9-JH16I3-May7-correct-Spot 165	35.803	5256.2	0.745779	20.188	2.58099	0.261711	4.05638	0.0383358	3.12932	0.771457	242.509	7.44792	236.045	8.5436	173.176	60.247	242.509	7.44792	NA
He9-JH16I3-May7-correct-Spot 129	296.857	12492.5	1.18531	19.4613	1.29375	0.274103	3.4697	0.0387054	3.21948	0.927883	244.804	7.73363	245.969	7.57947	258.089	29.7251	244.804	7.73363	NA
He9-JH16I3-May7-correct-Spot 152	605.063	15490.5	1.41868	19.2733	1.24973	0.279714	2.84792	0.0391163	2.55907	0.898574	247.353	6.21002	250.43	6.32068	280.378	28.6036	247.353	6.21002	NA
He9-JH16I3-May7-correct-Spot 239	224.985	6690.01	1.92505	19.9396	1.70273	0.271454	3.03152	0.0392737	2.50815	0.827358	248.329	6.11004	243.856	6.57192	201.991	39.5305	248.329	6.11004	NA
He9-JH16I3-May7-correct-Spot 243	388.809	31079.5	1.52349	19.1653	1.41245	0.287767	3.01215	0.0400171	2.66046	0.883242	252.939	6.59903	256.8	6.83467	293.19	32.261	252.939	6.59903	NA
He9-JH16I3-May7-correct-Spot 312	140.765	6547.66	2.28252	19.5754	1.60833	0.282732	2.77631	0.0401581	2.263	0.815111	253.813	5.63219	252.822	6.21358	244.637	37.057	253.813	5.63219	NA
He9-JH16I3-May7-correct-Spot 244	314.934	8190.34	1.59981	19.8745	2.00369	0.278604	3.24201	0.0401764	2.5487	0.786148	253.927	6.34603	249.55	7.17304	209.608	46.4761	253.927	6.34603	NA
He9-JH16I3-May7-correct-Spot 48	132.436	9083.44	1.85595	19.846	1.30451	0.279835	3.07805	0.040296	2.78795	0.90575	254.668	6.96158	250.526	6.83376	212.909	30.2457	254.668	6.96158	NA
He9-JH16I3-May7-correct-Spot 298	182.047	3115.62	1.35176	15.4823	3.231	0.36011	4.01135	0.0404538	2.3773	0.592644	255.645	5.95853	312.297	10.7845	760.982	68.1267	255.645	5.95853	NA
He9-JH16I3-May7-correct-Spot 64	483.177	25676.5	2.41913	19.1455	1.50016	0.292688	3.03673	0.0406594	2.64031	0.869458	256.919	6.65004	260.673	6.98158	295.579	34.2423	256.919	6.65004	NA
He9-JH16I3-May7-correct-Spot 69	329.336	40224.7	1.30942	19.1076	1.19073	0.293736	2.54301	0.0407242	2.24701	0.883603	257.32	5.66813	261.496	5.86265	300.099	27.1683	257.32	5.66813	NA
He9-JH16I3-May7-correct-Spot 131	206.889	5632.75	1.89265	20.1229	3.02049	0.279557	3.82376	0.0408178	2.34473	0.6132	257.9	5.92771	250.306	8.48285	180.707	70.4147	257.9	5.92771	NA
He9-JH16I3-May7-correct-Spot 116	267.581	26986.6	1.65196	19.3447	1.42283	0.291161	3.61784	0.0408679	3.3263	0.919418	258.211	8.41913	259.472	8.28401	271.862	32.5936	258.211	8.41913	NA
He9-JH16I3-May7-correct-Spot 142	172.108	4473.92	2.38921	19.9298	3.11283	0.285649	3.87539	0.0413069	2.30845	0.595669	260.928	5.90313	255.129	8.74311	203.144	72.2459	260.928	5.90313	NA
He9-JH16I3-May7-correct-Spot 225	423.541	10357.4	1.07915	19.5001	1.19387	0.299885	2.95757	0.0424306	2.7059	0.914906	267.882	7.10006	266.31	6.92822	253.522	27.465	267.882	7.10006	NA
He9-JH16I3-May7-correct-Spot 226	393.095	36037.4	1.72758	18.4713	1.20482	0.320449	2.51151	0.0429482	2.20365	0.877422	271.081	5.84983	282.248	6.18881	376.769	27.087	271.081	5.84983	NA
He9-JH16I3-May7-correct-Spot 176	971.15	100625	3.36566	19.2374	1.15516	0.309386	3.04624	0.0431851	2.81872	0.925311	272.546	7.52216	273.705	7.30861	284.604	26.4118	272.546	7.52216	NA
He9-JH16I3-May7-correct-Spot 145	404.015	27764.8	1.47842	19.5499	1.20131	0.306721	3.3157	0.0435086	3.09043	0.932058	274.544	8.30646	271.636	7.90269	247.64	27.6541	274.544	8.30646	NA
He9-JH16I3-May7-correct-Spot 47	97.3584	6992.96	1.57596	18.8617	1.63254	0.317921	2.92012	0.0435099	2.42114	0.829124	274.553	6.50774	280.302	7.15266	329.542	37.0376	274.553	6.50774	NA
He9-JH16I3-May7-correct-Spot 260	664.848	36753.2	5.74854	19.1937	1.30178	0.314461	2.96846	0.0437939	2.66779	0.898713	276.307	7.21554	277.633	7.21086	289.835	29.7435	276.307	7.21554	NA
He9-JH16I3-May7-correct-Spot 309	273.518	64879.7	4.01032	18.7233	1.19723	0.322463	2.45863	0.0438076	2.14744	0.87343	276.391	5.8099	283.796	6.0873	346.21	27.0816	276.391	5.8099	NA
He9-JH16I3-May7-correct-Spot 62	591.2	22461.1	2.45556	19.7898	0.889472	0.307931	2.72197	0.0442163	2.57254	0.945102	278.915	7.02218	272.576	6.50711	219.482	20.5817	278.915	7.02218	NA
He9-JH16I3-May7-correct-Spot 235	192.625	19183	1.51636	18.8888	1.60348	0.323003	2.90592	0.0442689	2.42347	0.833977	279.24	6.62281	284.21	7.20388	326.266	36.3804	279.24	6.62281	NA
He9-JH16I3-May7-correct-Spot 304	245.079	224860	1.26251	19.0485	1.491	0.324023	3.33786	0.0447841	2.98634	0.894687	282.419	8.25192	284.993	8.29446	307.137	33.9815	282.419	8.25192	NA
He9-JH16I3-May7-correct-Spot 141	242.041	78197.6	1.60758	18.9971	1.1374	0.3254	2.69303	0.0448531	2.44105	0.906433	282.845	6.75511	286.048	6.71348	313.309	25.8572	282.845	6.75511	NA
He9-JH16I3-May7-correct-Spot 282	93.1263	8243.2	1.45702	19.4191	1.63286	0.318777	2.74542	0.0449162	2.20706	0.803906	283.234	6.11581	280.962	6.73847	263.086	37.4893	283.234	6.11581	NA
He9-JH16I3-May7-correct-Spot 280	137.705	4380.38	3.82981	19.6566	1.69564	0.315703	3.08051	0.0450272	2.57183	0.834873	283.919	7.14346	278.592	7.50552	235.124	39.1063	283.919	7.14346	NA
He9-JH16I3-May7-correct-Spot 211	146.261	8785.72	2.54736	18.392	1.34887	0.338722	2.66362	0.0452023	2.29682	0.862295	284.999	6.40332	296.203	6.84323	386.446	30.2782	284.999	6.40332	NA
He9-JH16I3-May7-correct-Spot 68	458.809	43125.9	1.8312	19.1805	1.11296	0.327973	2.66892	0.0456443	2.42579	0.908903	287.724	6.82611	288.017	6.69299	291.412	25.4056	287.724	6.82611	NA
He9-JH16I3-May7-correct-Spot 58	109.356	4154.64	3.17319	20.0001	3.87935	0.316376	4.9401	0.0459118	3.05862	0.619142	289.373	8.65512	279.111	12.0562	195.002	90.2155	289.373	8.65512	NA
He9-JH16I3-May7-correct-Spot 179	242.046	96718.7	3.73004	18.808	1.32564	0.339331	3.13835	0.0463078	2.84463	0.90641	291.814	8.11595	296.664	8.07375	335.991	30.0356	291.814	8.11595	NA
He9-JH16I3-May7-correct-Spot 279	562.418	3982.83	2.20018	15.7428	4.74068	0.407529	5.59214	0.0465508	2.96614	0.530413	293.311	8.50507	347.094	16.4417	725.706	100.602	293.311	8.50507	NA
He9-JH16I3-May7-correct-Spot 252	184.048	12071.8	1.25038	19.3868	1.34394	0.332116	3.40247	0.046718	3.1258	0.918686	294.34	8.99361	291.18	8.61356	266.886	30.8255	294.34	8.99361	NA
He9-JH16I3-May7-correct-Spot 59	175.088	13448	3.49479	18.6813	1.36894	0.346492	3.31644	0.0469666	3.02072	0.910833	295.871	8.73546	302.079	8.66567	351.3	30.9161	295.871	8.73546	NA
He9-JH16I3-May7-correct-Spot 156	137.519	17729	1.42604	18.5586	1.65272	0.353223	2.72207	0.0475644	2.16291	0.794583	299.551	6.33079	307.142	7.21467	366.158	37.2413	299.551	6.33079	NA
He9-JH16I3-May7-correct-Spot 177	237.513	26980.2	1.97005	18.8503	1.10305	0.350561	2.68388	0.047948	2.44673	0.911639	301.911	7.21663	305.143	7.07374	330.937	25.027	301.911	7.21663	NA
He9-JH16I3-May7-correct-Spot 37	61.5589	3981.66	1.56144	19.6548	1.97779	0.336947	3.71471	0.0480528	3.14443	0.84648	302.556	9.29385	294.856	9.50638	235.334	45.639	302.556	9.29385	NA
He9-JH16I3-May7-correct-Spot 125	361.186	11174.2	1.36371	18.5365	1.30518	0.358802	2.9277	0.0482581	2.62068	0.895132	303.818	7.7774	311.32	7.8499	368.844	29.3832	303.818	7.7774	NA
He9-JH16I3-May7-correct-Spot 83	52.568	12483.6	1.00863	18.5171	1.8699	0.360571	3.18944	0.0484454	2.5838	0.81011	304.97	7.69632	312.641	8.58271	371.197	42.0968	304.97	7.69632	NA
He9-JH16I3-May7-correct-Spot 264	174.562	5259.47	1.16934	19.8616	1.65264	0.336999	3.01341	0.0485658	2.5198	0.836197	305.71	7.5235	294.895	7.71248	211.132	38.3154	305.71	7.5235	NA
He9-JH16I3-May7-correct-Spot 53	472.647	35164.3	2.39636	18.7074	1.44214	0.358492	3.12533	0.048661	2.77271	0.887174	306.295	8.29409	311.088	8.37449	348.13	32.6103	306.295	8.29409	NA
He9-JH16I3-May7-correct-Spot 148	215.888	28623.3	1.81935	18.3276	1.35024	0.367855	3.18323	0.0489182	2.88267	0.905581	307.877	8.66647	318.062	8.69251	394.315	30.2851	307.877	8.66647	NA
He9-JH16I3-May7-correct-Spot 127	63.7235	3546.8	2.79444	19.6556	4.46238	0.343694	5.05878	0.0490168	2.38296	0.471053	308.482	7.17789	299.967	13.1393	235.246	103.016	308.482	7.17789	NA
He9-JH16I3-May7-correct-Spot 198	314.792	12860.9	2.43443	19.2905	1.25505	0.350904	2.86694	0.0491156	2.57763	0.899089	309.09	7.77921	305.401	7.5617	278.333	28.7223	309.09	7.77921	NA
He9-JH16I3-May7-correct-Spot 164	316.44	111777	2.52839	18.8176	1.28166	0.359758	2.96208	0.0491204	2.67045	0.901544	309.119	8.06007	312.034	7.95765	334.86	29.0397	309.119	8.06007	NA
He9-JH16I3-May7-correct-Spot 240	112.106	7960.42	1.92388	19.2466	1.91265	0.352739	2.92213	0.0492602	2.20921	0.756027	309.978	6.68602	306.779	7.73707	283.545	43.7586	309.978	6.68602	NA
He9-JH16I3-May7-correct-Spot 119	566.714	240877	1.84914	18.9619	1.2427	0.360702	3.20631	0.049627	2.95569	0.921836	312.231	9.00867	312.739	8.6304	317.488	28.2375	312.231	9.00867	NA
He9-JH16I3-May7-correct-Spot 270	152.006	32987	2.02086	18.6221	1.44454	0.368507	2.97181	0.0497923	2.5971	0.873913	313.246	7.94083	318.546	8.12566	358.452	32.588	313.246	7.94083	NA
He9-JH16I3-May7-correct-Spot 233	103.778	9721.12	2.88898	17.4836	1.42269	0.396173	2.87131	0.0502578	2.49407	0.868616	316.104	7.69368	338.869	8.27304	499.096	31.3346	316.104	7.69368	NA
He9-JH16I3-May7-correct-Spot 107	664.884	38373.9	1.1719	19.1417	0.965502	0.363361	2.03528	0.0504668	1.79169	0.880319	317.387	5.54888	314.721	5.50789	296.029	22.0362	317.387	5.54888	NA
He9-JH16I3-May7-correct-Spot 180	136.457	16865.5	1.17407	19.0514	1.50784	0.365146	2.82999	0.0504756	2.39484	0.846237	317.441	7.41807	316.049	7.68618	306.779	34.3606	317.441	7.41807	NA
He9-JH16I3-May7-correct-Spot 220	245.946	16366.3	2.2011	19.0135	1.65418	0.366258	2.77976	0.0505284	2.234	0.803667	317.765	6.92675	316.876	7.56658	311.358	37.6735	317.765	6.92675	NA
He9-JH16I3-May7-correct-Spot 66	122.322	4418.27	1.59169	19.8521	1.61958	0.350866	2.65582	0.05054	2.10484	0.792538	317.836	6.52768	305.372	7.00429	212.198	37.5289	317.836	6.52768	NA
He9-JH16I3-May7-correct-Spot 52	262.772	46963.8	1.28201	18.4895	0.961759	0.39775	3.45619	0.0533609	3.31967	0.960502	335.123	10.8408	340.015	9.98669	374.558	21.6251	335.123	10.8408	NA
He9-JH16I3-May7-correct-Spot 268	82.3067	2806.52	1.11044	19.0646	2.60345	0.38777	3.97199	0.0536401	2.99979	0.755236	336.831	9.84481	332.739	11.2697	305.211	59.3232	336.831	9.84481	NA
He9-JH16I3-May7-correct-Spot 143	56.8183	1863.67	2.39025	21.2451	7.11339	0.351424	7.51099	0.0541725	2.41137	0.321046	340.088	7.98822	305.792	19.8346	52.7612	169.929	340.088	7.98822	NA
He9-JH16I3-May7-correct-Spot 89	477.898	12725.4	1.30137	17.6891	1.45356	0.427662	3.05227	0.0548902	2.68394	0.879325	344.475	9.00282	361.515	9.28411	473.322	32.1581	344.475	9.00282	NA
He9-JH16I3-May7-correct-Spot 274	420.25	26372	3.6706	18.5436	1.3441	0.412128	3.2911	0.0554516	3.00412	0.912802	347.905	10.1745	350.406	9.75308	367.977	30.2868	347.905	10.1745	NA
He9-JH16I3-May7-correct-Spot 168	82.037	2987.28	1.18905	19.8077	1.71241	0.408405	2.78865	0.0586967	2.20096	0.789256	367.694	7.86634	347.726	8.21103	217.412	39.6538	367.694	7.86634	NA
He9-JH16I3-May7-correct-Spot 153	349.526	7271.92	46.2922	17.3286	2.54994	0.481547	4.16591	0.0605465	3.29433	0.790783	378.948	12.124	399.134	13.7496	518.677	55.9718	378.948	12.124	NA
He9-JH16I3-May7-correct-Spot 54	1199.4	8484.8	2.3789	15.9342	1.21386	0.529136	3.17056	0.0611766	2.92899	0.923808	382.777	10.8851	431.236	11.1405	700.027	25.8327	382.777	10.8851	NA
He9-JH16I3-May7-correct-Spot 136	51.0878	5401.55	2.0492	15.9127	3.14918	0.546757	4.06408	0.0631285	2.56894	0.632107	394.624	9.83359	442.87	14.588	702.94	67.0248	394.624	9.83359	NA
He9-JH16I3-May7-correct-Spot 257	145.271	4645.07	1.95765	12.0629	5.28715	0.724766	5.71871	0.0634364	2.17939	0.381098	396.49	8.3807	553.477	24.405	1266.85	103.305	396.49	8.3807	NA
He9-JH16I3-May7-correct-Spot 41	654.237	18988.2	2.10076	20.6777	1.81551	0.422887	3.7475	0.0634476	3.27837	0.874814	396.558	12.6088	358.113	11.3095	116.967	42.8223	396.558	12.6088	NA
He9-JH16I3-May7-correct-Spot 134	238.004	37213.3	1.51294	17.8094	1.32534	0.491163	2.62149	0.063469	2.26179	0.862787	396.688	8.70175	405.703	8.76777	458.325	29.3971	396.688	8.70175	NA
He9-JH16I3-May7-correct-Spot 32	407.295	34754	1.94253	18.3042	1.2264	0.485435	2.544	0.0644717	2.22888	0.876129	402.763	8.70241	401.795	8.4418	397.186	27.494	402.763	8.70241	101.404
He9-JH16I3-May7-correct-Spot 217	57.6642	12954.2	2.45132	17.4917	1.78123	0.514734	3.523	0.0653284	3.03952	0.862767	407.949	12.0155	421.627	12.1565	498.075	39.2194	407.949	12.0155	81.9052
He9-JH16I3-May7-correct-Spot 98	227.992	13867.1	3.21366	18.1268	1.40441	0.507552	2.93808	0.066756	2.58069	0.878358	416.582	10.4107	416.802	10.0442	418.968	31.3647	416.582	10.4107	99.4305
He9-JH16I3-May7-correct-Spot 186	401.735	14659.3	1.16614	17.4691	1.3614	0.527317	2.9491	0.066839	2.61607	0.887072	417.083	10.5657	430.027	10.339	500.964	29.9762	417.083	10.5657	83.2563
He9-JH16I3-May7-correct-Spot 258	64.7023	20650.5	1.30208	17.6937	1.88164	0.527565	3.17331	0.0677304	2.55525	0.805233	422.468	10.449	430.193	11.1285	472.745	41.6339	422.468	10.449	89.3648
He9-JH16I3-May7-correct-Spot 303	123.851	13735.4	1.72334	17.898	1.47747	0.523755	2.78226	0.0680176	2.35756	0.847352	424.201	9.67885	427.657	9.7108	447.269	32.8343	424.201	9.67885	94.8425
He9-JH16I3-May7-correct-Spot 90	526.146	98120.2	3.79084	17.9083	1.27755	0.524378	3.56496	0.0681377	3.32818	0.933582	424.926	13.6863	428.072	12.4525	445.987	28.4074	424.926	13.6863	95.2777
He9-JH16I3-May7-correct-Spot 88	68.6851	5703.43	2.22672	17.8084	1.82569	0.529442	3.16472	0.068412	2.58501	0.816821	426.581	10.6702	431.439	11.1242	458.432	40.4956	426.581	10.6702	93.0522
He9-JH16I3-May7-correct-Spot 94	308.63	29160.2	1.03447	18.0733	1.19605	0.523671	2.93394	0.0686726	2.67908	0.913133	428.154	11.0979	427.601	10.2391	425.571	26.6804	428.154	11.0979	100.607
He9-JH16I3-May7-correct-Spot 40	488.871	62217.2	2.62163	18.198	1.2657	0.521057	3.00819	0.0688011	2.72896	0.907177	428.929	11.3244	425.857	10.4638	410.218	28.3095	428.929	11.3244	104.561
He9-JH16I3-May7-correct-Spot 128	492.325	7502.65	3.71723	17.2886	1.1274	0.551305	3.75269	0.0691576	3.57933	0.953806	431.078	14.9252	445.851	13.5423	523.746	24.7471	431.078	14.9252	82.3068
He9-JH16I3-May7-correct-Spot 139	229.697	895736	2.37293	17.5779	1.21462	0.549086	2.87027	0.0700317	2.60061	0.906049	436.347	10.9721	444.398	10.3308	487.237	26.8196	436.347	10.9721	89.5554
He9-JH16I3-May7-correct-Spot 224	311.675	11387.3	1.45355	17.6083	1.73169	0.549323	3.58376	0.0701831	3.1376	0.875507	437.259	13.2645	444.553	12.9026	483.464	38.2444	437.259	13.2645	90.4429
He9-JH16I3-May7-correct-Spot 26	123.519	18645.3	3.12941	18.0167	1.54367	0.537107	3.74125	0.0702141	3.40794	0.910909	437.446	14.4133	436.515	13.2748	432.56	34.4124	437.446	14.4133	101.13
He9-JH16I3-May7-correct-Spot 214	215.316	55666	2.05026	17.7181	1.32017	0.546944	2.95488	0.0703149	2.64357	0.894646	438.053	11.1956	442.993	10.6085	469.685	29.2249	438.053	11.1956	93.2653
He9-JH16I3-May7-correct-Spot 96	296.623	19750.4	1.69032	17.9122	1.41405	0.543633	3.43168	0.070655	3.1268	0.911158	440.1	13.3018	440.817	12.2721	445.507	31.4344	440.1	13.3018	98.7864
He9-JH16I3-May7-correct-Spot 51	579.051	515178	2.78979	17.9592	1.14782	0.547316	3.33474	0.0713204	3.13097	0.938896	444.106	13.4367	443.237	11.9776	439.675	25.5631	444.106	13.4367	101.008
He9-JH16I3-May7-correct-Spot 273	412.805	15428.8	3.03047	17.8686	1.10879	0.552278	3.44183	0.071604	3.25833	0.946688	445.812	14.0352	446.488	12.4345	450.918	24.6245	445.812	14.0352	98.8676
He9-JH16I3-May7-correct-Spot 248	56.4423	15463.7	3.02156	17.3753	2.10425	0.569792	3.19096	0.0718352	2.39882	0.751756	447.203	10.364	457.88	11.761	512.792	46.2578	447.203	10.364	87.2095
He9-JH16I3-May7-correct-Spot 112	95.643	26082.9	1.94025	17.1264	1.59838	0.578972	3.35392	0.0719468	2.94856	0.879137	447.874	12.7575	463.8	12.4879	544.423	34.9418	447.874	12.7575	82.2657
He9-JH16I3-May7-correct-Spot 61	103.352	27584.9	1.89807	17.6523	1.31321	0.566599	3.05428	0.0725713	2.75755	0.902849	451.629	12.0277	455.812	11.2169	477.904	29.0297	451.629	12.0277	94.5019
He9-JH16I3-May7-correct-Spot 86	788.849	21546.7	1.36548	17.2513	1.13881	0.602097	2.82539	0.0753663	2.58571	0.915172	468.405	11.6821	478.564	10.7821	528.517	24.9478	468.405	11.6821	88.6264
He9-JH16I3-May7-correct-Spot 315	132.995	5790.4	2.4163	17.7923	1.45775	0.599789	3.21247	0.0774319	2.86268	0.891115	480.775	13.2624	477.1	12.23	460.413	32.3375	480.775	13.2624	104.423
He9-JH16I3-May7-correct-Spot 293	259.872	9141.3	1.41506	17.6827	1.37935	0.611184	3.22578	0.0784166	2.916	0.903968	486.665	13.6687	484.306	12.4255	474.145	30.5225	486.665	13.6687	102.64
He9-JH16I3-May7-correct-Spot 81	212.769	1.525e+06	1.65229	17.569	1.61246	0.618163	3.36242	0.0788021	2.95057	0.877512	488.969	13.8938	488.695	13.0433	488.365	35.5812	488.969	13.8938	100.124
He9-JH16I3-May7-correct-Spot 188	52.5562	15197.6	2.55028	17.2865	1.8255	0.634208	3.07356	0.0795477	2.47271	0.804511	493.422	11.7457	498.714	12.112	524.008	40.0166	493.422	11.7457	94.163
He9-JH16I3-May7-correct-Spot 174	146.591	105574	2.55443	17.2389	1.28385	0.673469	2.63452	0.0842395	2.30053	0.873224	521.378	11.5222	522.82	10.7658	530.095	28.139	521.378	11.5222	98.3557
He9-JH16I3-May7-correct-Spot 292	566.888	35453.7	33.7428	17.2244	1.33531	0.690457	2.91655	0.0862916	2.59292	0.889036	533.568	13.2779	533.075	12.0963	531.942	29.2556	533.568	13.2779	100.306
He9-JH16I3-May7-correct-Spot 259	430.434	131815	1.13385	17.1839	1.32451	0.705123	3.26834	0.0879174	2.98793	0.914204	543.209	15.5657	541.846	13.7244	537.051	28.984	543.209	15.5657	101.147
He9-JH16I3-May7-correct-Spot 267	82.2392	70470.8	0.797636	16.814	1.11911	0.728116	2.54517	0.0888302	2.28594	0.898146	548.615	12.0222	555.447	10.8891	584.473	24.2941	548.615	12.0222	93.8649
He9-JH16I3-May7-correct-Spot 230	244.357	14939	0.465311	17.1888	1.31532	0.724449	2.94307	0.0903525	2.63279	0.894574	557.622	14.064	553.29	12.5548	536.432	28.7648	557.622	14.064	103.95
He9-JH16I3-May7-correct-Spot 56	346.86	37222	2.80756	16.9749	0.997246	0.737002	2.77112	0.0907747	2.58546	0.933002	560.117	13.8703	560.655	11.9392	563.764	21.7255	560.117	13.8703	99.3532
He9-JH16I3-May7-correct-Spot 189	333.164	39534.7	1.80927	16.8973	1.09728	0.750806	2.72623	0.092052	2.49566	0.915425	567.662	13.5611	568.692	11.8714	573.748	23.8617	567.662	13.5611	98.9391
He9-JH16I3-May7-correct-Spot 288	93.2256	9835.74	0.62267	16.5704	1.66263	0.781705	3.13561	0.0939859	2.65852	0.847846	579.067	14.7235	586.456	13.9697	616.08	35.8924	579.067	14.7235	93.9923
He9-JH16I3-May7-correct-Spot 63	174.234	30061.9	2.19216	16.5974	1.45884	0.799134	2.80658	0.0962382	2.39764	0.854293	592.325	13.5689	596.34	12.6586	612.559	31.5293	592.325	13.5689	96.6969
He9-JH16I3-May7-correct-Spot 249	151.28	81088.3	14.0513	16.3832	1.24858	0.834077	3.16715	0.0991503	2.91065	0.919012	609.427	16.9257	615.872	14.6257	640.594	26.8715	609.427	16.9257	95.1347
He9-JH16I3-May7-correct-Spot 101	84.1812	11826.5	1.44176	16.0543	1.49558	0.852508	2.85339	0.0993065	2.43003	0.851631	610.344	14.1511	626.025	13.3338	684.052	31.9321	610.344	14.1511	89.2248
He9-JH16I3-May7-correct-Spot 82	389.126	93125.2	5.05755	16.5704	1.01769	0.828908	2.97038	0.0996613	2.7906	0.939476	612.424	16.3036	613.006	13.6704	616.076	21.986	612.424	16.3036	99.4073
He9-JH16I3-May7-correct-Spot 202	453.962	205964	1.84315	16.4836	1.26235	0.834113	2.42334	0.0997622	2.06859	0.85361	613.015	12.0965	615.892	11.1908	627.398	27.2073	613.015	12.0965	97.7075
He9-JH16I3-May7-correct-Spot 178	120.183	19168	3.5085	16.2828	1.3261	0.844585	2.57737	0.0997842	2.21004	0.857479	613.144	12.9262	621.673	11.9832	653.767	28.4558	613.144	12.9262	93.7863
He9-JH16I3-May7-correct-Spot 247	356.962	30437.9	3.19276	16.261	1.19024	0.860632	3.02808	0.101543	2.78435	0.91951	623.447	16.546	630.468	14.2227	656.676	25.508	623.447	16.546	94.9398
He9-JH16I3-May7-correct-Spot 65	67.2131	15964.7	0.825933	16.2833	1.60383	0.865464	3.24882	0.102254	2.82534	0.869652	627.603	16.8961	633.101	15.3056	653.727	34.4167	627.603	16.8961	96.0038
He9-JH16I3-May7-correct-Spot 262	135.672	12985.4	2.77619	16.4312	1.26526	0.864087	3.11462	0.103018	2.84605	0.91377	632.072	17.1353	632.352	14.6608	634.307	27.2383	632.072	17.1353	99.6478
He9-JH16I3-May7-correct-Spot 254	121.313	12829.4	3.2657	16.0619	1.14499	0.906852	2.94545	0.105687	2.71379	0.921351	647.65	16.7219	655.383	14.2242	683.002	24.4715	647.65	16.7219	94.8241
He9-JH16I3-May7-correct-Spot 301	136.617	15811.3	2.29944	15.8246	1.12103	0.9638	2.35085	0.110665	2.06635	0.878979	676.606	13.2724	685.263	11.7156	714.697	23.8075	676.606	13.2724	94.6703
He9-JH16I3-May7-correct-Spot 305	196.63	48621.6	2.86002	15.4759	0.971099	1.00173	2.6858	0.112485	2.50409	0.932346	687.164	16.3219	704.687	13.6482	761.854	20.4734	687.164	16.3219	90.1963
He9-JH16I3-May7-correct-Spot 135	66.8891	5751.87	1.15914	15.8427	1.75577	1.02616	3.09382	0.117959	2.54736	0.823369	718.804	17.3266	717.004	15.9112	712.309	37.2965	718.804	17.3266	100.912
He9-JH16I3-May7-correct-Spot 246	124.533	40842.3	1.9013	15.6706	2.0576	1.04064	4.52034	0.118324	4.02489	0.890396	720.912	27.4525	724.235	23.4105	735.48	43.5507	720.912	27.4525	98.0193
He9-JH16I3-May7-correct-Spot 271	62.8017	17375.1	1.0932	15.2706	1.47867	1.10802	2.7038	0.12277	2.26363	0.837206	746.485	15.9561	757.219	14.4313	789.944	31.0541	746.485	15.9561	94.4984
He9-JH16I3-May7-correct-Spot 50	108.887	21648	0.771232	15.2741	1.28815	1.1083	2.48925	0.122829	2.13003	0.855692	746.825	15.0207	757.357	13.2876	789.472	27.0568	746.825	15.0207	94.5981
He9-JH16I3-May7-correct-Spot 203	303.8	48990.9	1.72189	15.5037	1.16207	1.09388	2.83498	0.123054	2.58587	0.912128	748.115	18.265	750.389	15.0394	758.073	24.4945	748.115	18.265	98.6865
He9-JH16I3-May7-correct-Spot 163	155.061	18785.1	1.61872	15.7566	1.23437	1.07737	2.58494	0.123172	2.27117	0.878618	748.795	16.0559	742.347	13.6131	723.85	26.1732	748.795	16.0559	103.446
He9-JH16I3-May7-correct-Spot 296	42.3671	4196.1	0.350668	15.6368	1.63293	1.08591	3.46791	0.123205	3.05941	0.882204	748.984	21.6335	746.513	18.3334	740.012	34.5376	748.984	21.6335	101.212
He9-JH16I3-May7-correct-Spot 302	615.174	130699	1.96875	15.1762	1.22528	1.11953	2.72725	0.123278	2.43651	0.893395	749.402	17.2379	762.748	14.6278	802.948	25.6763	749.402	17.2379	93.3313
He9-JH16I3-May7-correct-Spot 300	65.153	13786.9	4.46695	15.015	1.21859	1.13734	2.64174	0.12391	2.3439	0.887254	753.027	16.6583	771.248	14.2747	825.298	25.4511	753.027	16.6583	91.2431
He9-JH16I3-May7-correct-Spot 208	144.053	24284.5	1.66302	15.4935	1.19777	1.10823	3.21268	0.124585	2.98105	0.927901	756.901	21.2894	757.32	17.1494	759.457	25.2422	756.901	21.2894	99.6635
He9-JH16I3-May7-correct-Spot 227	95.3434	31720.8	1.53149	15.4778	1.15226	1.12908	2.64183	0.126801	2.3773	0.89987	769.593	17.2457	767.317	14.2264	761.595	24.2734	769.593	17.2457	101.05
He9-JH16I3-May7-correct-Spot 123	153.261	21459.9	2.43526	14.9362	1.75751	1.17624	3.08759	0.127474	2.53858	0.822187	773.441	18.5023	789.559	16.9464	836.257	36.6152	773.441	18.5023	92.4884
He9-JH16I3-May7-correct-Spot 171	540.525	54988.9	8.35307	15.3995	1.38296	1.14404	3.37572	0.12783	3.07944	0.91223	775.475	22.4999	774.423	18.2916	772.288	29.1077	775.475	22.4999	100.413
He9-JH16I3-May7-correct-Spot 231	215.694	339134	1.11233	15.0752	1.36751	1.18184	2.5069	0.129273	2.10106	0.838113	783.716	15.5048	792.168	13.7889	816.96	28.5769	783.716	15.5048	95.9308
He9-JH16I3-May7-correct-Spot 290	40.7207	12474.2	0.605275	14.9102	1.45435	1.20979	3.1259	0.130882	2.76697	0.885174	792.895	20.6436	805.094	17.3783	839.875	30.3013	792.895	20.6436	94.4062
He9-JH16I3-May7-correct-Spot 113	321.323	50651.7	0.650762	15.2947	1.0187	1.18402	2.80235	0.131398	2.61063	0.931588	795.835	19.5451	793.186	15.4272	786.643	21.3905	795.835	19.5451	101.169
He9-JH16I3-May7-correct-Spot 184	325.785	35710.6	1.40187	15.302	1.17939	1.1874	2.61769	0.131836	2.33695	0.892754	798.332	17.5477	794.755	14.4294	785.631	24.7686	798.332	17.5477	101.617
He9-JH16I3-May7-correct-Spot 213	138.645	19228	1.39679	15.3526	1.28897	1.18428	2.79204	0.131924	2.47669	0.887057	798.831	18.6079	793.304	15.372	778.697	27.1009	798.831	18.6079	102.586
He9-JH16I3-May7-correct-Spot 200	76.7905	22617.7	1.33285	14.9494	1.33911	1.24016	2.71146	0.134521	2.35771	0.869535	813.607	18.0214	818.957	15.2428	834.412	27.9063	813.607	18.0214	97.5066
He9-JH16I3-May7-correct-Spot 251	48.5807	23702	1.99044	14.8462	1.29798	1.24957	3.15539	0.134606	2.87606	0.911476	814.086	21.9956	823.212	17.7987	848.828	26.9669	814.086	21.9956	95.9071
He9-JH16I3-May7-correct-Spot 78	231.352	19922.1	1.81805	15.1151	1.40154	1.24558	3.08536	0.136606	2.74866	0.890871	825.441	21.2961	821.408	17.3789	811.434	29.3144	825.441	21.2961	101.726
He9-JH16I3-May7-correct-Spot 126	28.5729	34375.5	3.99454	14.4506	1.40636	1.30897	2.73764	0.137247	2.34879	0.857961	829.076	18.273	849.674	15.7598	904.73	28.9907	829.076	18.273	91.6379
He9-JH16I3-May7-correct-Spot 194	79.6371	11335.4	2.62889	15.1191	1.24214	1.25469	2.76576	0.137642	2.47114	0.893475	831.314	19.2735	825.519	15.6289	810.832	25.982	831.314	19.2735	102.526
He9-JH16I3-May7-correct-Spot 199	60.2989	11574.2	2.03056	14.5989	1.68425	1.32649	3.58931	0.140511	3.16962	0.883071	847.552	25.1732	857.348	20.7828	883.689	34.8471	847.552	25.1732	95.9106
He9-JH16I3-May7-correct-Spot 122	160.115	147966	1.18594	14.7502	1.27968	1.32061	2.7261	0.141339	2.40708	0.882976	852.229	19.2158	854.781	15.7536	862.293	26.5557	852.229	19.2158	98.833
He9-JH16I3-May7-correct-Spot 162	224.507	35009.2	3.07785	14.8318	1.06953	1.36576	3.06312	0.146979	2.87034	0.937062	884.009	23.7112	874.347	17.9574	850.876	22.2132	884.009	23.7112	103.894
He9-JH16I3-May7-correct-Spot 256	154.255	83999.1	3.72707	14.7155	1.40416	1.38047	2.42392	0.147398	1.97578	0.81512	886.361	16.362	880.642	14.2739	867.218	29.0991	886.361	16.362	102.207
He9-JH16I3-May7-correct-Spot 193	168.837	132379	0.640308	14.5093	1.40785	1.46272	2.66788	0.153992	2.26617	0.849429	923.302	19.4943	915.132	16.0909	896.379	29.0533	896.379	29.0533	103.003
He9-JH16I3-May7-correct-Spot 205	314.158	48718.2	15.9408	14.4126	1.11965	1.49194	2.51055	0.15602	2.24705	0.895043	934.622	19.55	927.106	15.2632	910.151	23.0477	910.151	23.0477	102.689
He9-JH16I3-May7-correct-Spot 106	149.775	75170.9	3.73306	14.3789	1.00533	1.48047	2.31557	0.154459	2.08595	0.900836	925.911	17.9911	922.422	14.034	915.003	20.6708	915.003	20.6708	101.192
He9-JH16I3-May7-correct-Spot 229	369.917	36433.4	6.19992	14.2347	1.18361	1.48418	2.76029	0.153294	2.49364	0.903399	919.399	21.3667	923.94	16.7466	935.691	24.296	935.691	24.296	98.2589
He9-JH16I3-May7-correct-Spot 170	380.315	58324.1	3.7946	14.2073	1.28278	1.46179	2.9406	0.15069	2.64606	0.899835	904.833	22.3381	914.748	17.7315	939.621	26.3149	939.621	26.3149	96.2976
He9-JH16I3-May7-correct-Spot 43	151.719	19163.4	1.52349	14.1831	1.02266	1.59027	2.83742	0.163655	2.64672	0.932791	977.058	23.9958	966.402	17.6898	943.146	20.951	943.146	20.951	103.596
He9-JH16I3-May7-correct-Spot 218	222.341	19652.7	2.94509	14.0653	1.2067	1.56508	2.95007	0.159725	2.69199	0.912517	955.246	23.9007	956.48	18.2787	960.226	24.6599	960.226	24.6599	99.4814
He9-JH16I3-May7-correct-Spot 166	515.59	60101.4	4.15371	13.9835	1.28231	1.61748	3.56702	0.164112	3.32856	0.933149	979.59	30.2499	977.012	22.3852	972.091	26.1532	972.091	26.1532	100.771
He9-JH16I3-May7-correct-Spot 75	167.346	43617.6	1.56865	13.9186	1.22434	1.56095	2.98655	0.157643	2.72405	0.912107	943.663	23.913	954.846	18.4857	981.607	24.9348	981.607	24.9348	96.1345
He9-JH16I3-May7-correct-Spot 283	144.627	20875.7	0.541937	13.8822	1.47376	1.60911	2.6447	0.162081	2.19601	0.830344	968.33	19.7446	973.763	16.563	986.908	29.9911	986.908	29.9911	98.1176
He9-JH16I3-May7-correct-Spot 146	157.127	16243.8	1.30298	13.8363	1.14303	1.61104	2.75556	0.161739	2.50731	0.909909	966.434	22.5026	974.512	17.2653	993.631	23.2179	993.631	23.2179	97.2629
He9-JH16I3-May7-correct-Spot 39	154.612	16628	2.9443	13.6928	1.07404	1.74268	2.82637	0.17314	2.61435	0.924985	1029.39	24.8732	1024.46	18.2368	1014.8	21.7528	1014.8	21.7528	101.437
He9-JH16I3-May7-correct-Spot 210	77.9453	11350.5	1.6246	13.5993	1.37699	1.77583	2.77982	0.175229	2.41481	0.868693	1040.86	23.2106	1036.66	18.0593	1028.67	27.8626	1028.67	27.8626	101.185
He9-JH16I3-May7-correct-Spot 287	105.583	33801.3	0.678148	13.4265	1.20553	1.7665	2.88534	0.172094	2.62143	0.908533	1023.64	24.812	1033.24	18.7094	1054.51	24.2971	1054.51	24.2971	97.0725
He9-JH16I3-May7-correct-Spot 297	465.138	74098.4	6.2583	13.4184	1.01173	1.79666	2.71422	0.174927	2.51861	0.927932	1039.2	24.1728	1044.25	17.707	1055.72	20.3932	1055.72	20.3932	98.4351
He9-JH16I3-May7-correct-Spot 27	225.106	84249.1	1.21657	13.378	1.4453	1.84853	3.60697	0.179434	3.30475	0.91621	1063.88	32.4108	1062.91	23.7716	1061.8	29.0804	1061.8	29.0804	100.196
He9-JH16I3-May7-correct-Spot 294	931.296	36686.7	5.60202	13.1738	1.22728	1.7347	2.80274	0.165814	2.51975	0.899031	989.008	23.1031	1021.5	18.054	1092.64	24.5792	1092.64	24.5792	90.5155
He9-JH16I3-May7-correct-Spot 117	371.954	292333	1.03452	12.7318	1.2207	2.08765	2.72179	0.192857	2.4327	0.893787	1136.83	25.3546	1144.75	18.688	1160.64	24.2041	1160.64	24.2041	97.9487
He9-JH16I3-May7-correct-Spot 111	68.182	10334.9	3.05014	12.7059	1.1057	2.16537	2.50341	0.199629	2.24599	0.897173	1173.33	24.0938	1169.99	17.3905	1164.67	21.9287	1164.67	21.9287	100.743
He9-JH16I3-May7-correct-Spot 42	65.2927	7378.16	2.43389	12.3633	1.68787	2.25755	3.16184	0.202516	2.67363	0.845595	1188.82	29.0263	1199.14	22.2528	1218.62	33.1869	1218.62	33.1869	97.5551
He9-JH16I3-May7-correct-Spot 79	172.55	35957.9	3.3837	12.1756	1.0198	2.28225	2.5264	0.201624	2.31143	0.91491	1184.04	25.0019	1206.81	17.8389	1248.64	19.9655	1248.64	19.9655	94.8261
He9-JH16I3-May7-correct-Spot 310	538.8	36408.1	8.02807	11.5287	1.39368	2.42756	3.08156	0.203066	2.74839	0.891883	1191.77	29.9053	1250.8	22.1643	1354.71	26.8798	1354.71	26.8798	87.9722
He9-JH16I3-May7-correct-Spot 313	109.641	30153.3	1.25333	10.9914	1.48457	3.17125	2.91423	0.252913	2.50775	0.860518	1453.48	32.6329	1450.19	22.5003	1446.17	28.2748	1446.17	28.2748	100.505
He9-JH16I3-May7-correct-Spot 28	51.4139	25603.8	0.476038	10.5921	1.20567	3.52536	2.23176	0.270939	1.87807	0.841517	1545.57	25.8094	1532.92	17.6552	1516.32	22.7463	1516.32	22.7463	101.929
He9-JH16I3-May7-correct-Spot 181	104.252	70773	1.92375	10.3236	1.20479	3.57336	2.933	0.267667	2.67413	0.911739	1528.95	36.3995	1543.63	23.2734	1564.6	22.5853	1564.6	22.5853	97.7218
He9-JH16I3-May7-correct-Spot 306	142.601	55464.6	1.43034	10.2589	1.38444	3.7748	2.78706	0.280984	2.41889	0.867901	1596.32	34.2041	1587.4	22.3762	1576.37	25.9137	1576.37	25.9137	101.265
He9-JH16I3-May7-correct-Spot 234	894.31	43616.5	1.78251	10.2406	1.21207	3.19071	2.28034	0.237083	1.93154	0.847039	1371.51	23.863	1454.91	17.6309	1579.72	22.677	1579.72	22.677	86.8201
He9-JH16I3-May7-correct-Spot 154	330.481	391122	1.35352	10.0632	1.01163	3.92271	2.82183	0.286425	2.63426	0.93353	1623.64	37.8101	1618.38	22.8358	1612.34	18.8462	1612.34	18.8462	100.701
He9-JH16I3-May7-correct-Spot 263	153.658	181285	2.05834	9.96102	1.38285	3.61727	3.18594	0.261441	2.87018	0.90089	1497.21	38.3477	1553.34	25.3486	1631.33	25.7001	1631.33	25.7001	91.7785
He9-JH16I3-May7-correct-Spot 104	23.2818	16289	1.37372	9.79708	1.40854	3.35011	2.81122	0.238146	2.43289	0.865422	1377.05	30.1659	1492.82	21.9863	1662.11	26.0746	1662.11	26.0746	82.8498
He9-JH16I3-May7-correct-Spot 206	197.635	121956	2.29665	9.66005	0.96384	3.6566	2.92614	0.256298	2.76284	0.944194	1470.87	36.3355	1561.95	23.3351	1688.14	17.7823	1688.14	17.7823	87.1299
He9-JH16I3-May7-correct-Spot 291	26.0447	5304.61	1.81344	9.55792	1.36891	4.53041	2.72472	0.314187	2.35588	0.864633	1761.28	36.3085	1736.57	22.6675	1707.72	25.1945	1707.72	25.1945	103.136
He9-JH16I3-May7-correct-Spot 80	71.7611	161469	1.37435	9.49251	1.28083	4.41458	3.09118	0.304059	2.81334	0.910117	1711.41	42.287	1715.08	25.5959	1720.35	23.5339	1720.35	23.5339	99.4801
He9-JH16I3-May7-correct-Spot 121	121.121	55032.7	3.42245	9.42514	1.0835	4.18837	2.73805	0.286431	2.51455	0.918371	1623.67	36.0925	1671.75	22.4469	1733.43	19.8766	1733.43	19.8766	93.6683
He9-JH16I3-May7-correct-Spot 272	31.913	7586.57	1.22804	9.30459	1.40457	4.32415	2.37602	0.291935	1.91642	0.806568	1651.19	27.9163	1697.98	19.5968	1757	25.6899	1757	25.6899	93.9777
He9-JH16I3-May7-correct-Spot 191	29.7292	35774.8	1.03929	9.29551	1.15838	4.63443	2.63078	0.312577	2.36203	0.897842	1753.38	36.261	1755.49	21.975	1758.79	21.1815	1758.79	21.1815	99.6922
He9-JH16I3-May7-correct-Spot 250	14.5973	27750.7	1.18329	9.22131	1.25934	4.66368	2.91608	0.312039	2.63013	0.90194	1750.73	40.3239	1760.75	24.3861	1773.43	22.988	1773.43	22.988	98.72
He9-JH16I3-May7-correct-Spot 223	13.4185	27594.5	1.45159	9.10007	1.51478	4.63327	3.15067	0.305929	2.76263	0.876841	1720.64	41.7204	1755.28	26.3182	1797.55	27.5678	1797.55	27.5678	95.7212
He9-JH16I3-May7-correct-Spot 151	234.007	99826.8	1.86879	9.04594	1.04215	4.97506	2.7046	0.326543	2.49576	0.922782	1821.6	39.6046	1815.09	22.8698	1808.4	18.941	1808.4	18.941	100.73
He9-JH16I3-May7-correct-Spot 197	442.465	76002.9	9.06327	9.0459	1.07291	5.15318	2.93515	0.338232	2.73202	0.930796	1878.16	44.5136	1844.92	24.9645	1808.41	19.5003	1808.41	19.5003	103.857
He9-JH16I3-May7-correct-Spot 238	102.156	41795.2	2.20295	9.03015	1.08602	5.03555	2.72248	0.329936	2.49649	0.916991	1838.07	39.9257	1825.32	23.0674	1811.58	19.7309	1811.58	19.7309	101.462
He9-JH16I3-May7-correct-Spot 255	819.533	2.55833e+06	11.7722	9.01428	1.30724	3.94995	3.52444	0.258351	3.27304	0.92867	1481.4	43.3196	1623.98	28.5644	1814.78	23.7414	1814.78	23.7414	81.6299
He9-JH16I3-May7-correct-Spot 253	64.8683	31341.2	0.861465	8.9724	1.26007	4.96338	2.63081	0.323128	2.30941	0.877833	1804.99	36.3577	1813.11	22.2369	1823.22	22.861	1823.22	22.861	98.9997
He9-JH16I3-May7-correct-Spot 138	164.274	47913	2.4767	8.95314	1.34258	5.13356	2.69312	0.333489	2.3346	0.866876	1855.27	37.6381	1841.68	22.891	1827.12	24.3467	1827.12	24.3467	101.541
He9-JH16I3-May7-correct-Spot 307	61.5364	178724	0.520583	8.93732	1.15108	5.10884	2.71441	0.331297	2.45826	0.905633	1844.67	39.4362	1837.58	23.0539	1830.33	20.8652	1830.33	20.8652	100.783
He9-JH16I3-May7-correct-Spot 182	207.644	351916	2.04858	8.93689	1.16083	5.2297	3.15298	0.339118	2.93151	0.929759	1882.42	47.8574	1857.47	26.882	1830.42	21.0417	1830.42	21.0417	102.841
He9-JH16I3-May7-correct-Spot 103	31.6018	14445.1	0.78394	8.92581	1.44359	5.10702	2.52249	0.330752	2.06858	0.820053	1842.03	33.1436	1837.27	21.4221	1832.67	26.1591	1832.67	26.1591	100.511
He9-JH16I3-May7-correct-Spot 130	126.183	27002.9	2.25068	8.83826	1.30402	5.34674	3.20173	0.342881	2.92414	0.9133	1900.52	48.1317	1876.37	27.3942	1850.51	23.5803	1850.51	23.5803	102.702
He9-JH16I3-May7-correct-Spot 72	325.285	78022.2	12.1549	8.83277	1.08309	5.13746	2.60604	0.329256	2.37031	0.909543	1834.77	37.8488	1842.32	22.1534	1851.63	19.582	1851.63	19.582	99.0895
He9-JH16I3-May7-correct-Spot 160	332.362	120213	14.5659	8.81329	1.24413	4.99842	2.79543	0.319638	2.50331	0.895501	1787.96	39.0878	1819.05	23.6566	1855.62	22.4832	1855.62	22.4832	96.3538
He9-JH16I3-May7-correct-Spot 155	386.98	599152	5.04544	8.81125	1.2281	4.32357	2.8521	0.276419	2.57415	0.902545	1573.3	35.9361	1697.87	23.524	1856.04	22.1923	1856.04	22.1923	84.7667
He9-JH16I3-May7-correct-Spot 140	166.494	28255.6	1.36995	8.80018	0.968094	4.56472	2.90824	0.29147	2.74238	0.942969	1648.87	39.8988	1742.85	24.2277	1858.31	17.4884	1858.31	17.4884	88.7296
He9-JH16I3-May7-correct-Spot 158	462.406	128707	10.154	8.78153	1.35837	4.79099	2.70173	0.30527	2.33542	0.864415	1717.39	35.2104	1783.32	22.6996	1862.14	24.5286	1862.14	24.5286	92.2265
He9-JH16I3-May7-correct-Spot 207	272.976	218047	4.84982	8.77406	1.00301	5.22172	2.74862	0.332431	2.55907	0.931041	1850.15	41.1589	1856.17	23.4274	1863.68	18.1075	1863.68	18.1075	99.2744
He9-JH16I3-May7-correct-Spot 87	273.997	31575.4	5.70189	8.77035	1.2283	5.33816	2.59977	0.339701	2.29131	0.88135	1885.23	37.4537	1874.99	22.2363	1864.44	22.1733	1864.44	22.1733	101.115
He9-JH16I3-May7-correct-Spot 237	47.4782	33806.5	1.57179	8.73975	1.41816	5.43107	2.36336	0.344407	1.89057	0.799953	1907.84	31.2217	1889.77	20.2684	1870.75	25.58	1870.75	25.58	101.982
He9-JH16I3-May7-correct-Spot 190	307.057	119305	2.49937	8.72162	1.31885	5.33922	3.03016	0.33788	2.7281	0.900314	1876.46	44.4151	1875.16	25.9198	1874.49	23.7776	1874.49	23.7776	100.105
He9-JH16I3-May7-correct-Spot 169	223.368	9.25081e+06	2.77967	8.6996	0.808919	4.80495	2.54687	0.303303	2.41499	0.94822	1707.66	36.2301	1785.77	21.4087	1879.05	14.576	1879.05	14.576	90.8791
He9-JH16I3-May7-correct-Spot 91	400.234	96219.9	7.83426	8.69145	1.24078	5.31912	2.88341	0.335444	2.60279	0.902679	1864.71	42.1462	1871.94	24.6493	1880.74	22.3547	1880.74	22.3547	99.1479
He9-JH16I3-May7-correct-Spot 245	376.528	622933	4.90378	8.63874	1.05674	5.08551	3.40396	0.318766	3.23578	0.950592	1783.7	50.4209	1833.69	28.8914	1891.69	19.0135	1891.69	19.0135	94.2916
He9-JH16I3-May7-correct-Spot 261	973.818	560990	5.00177	8.6353	1.05416	5.30564	2.62705	0.332432	2.40627	0.915959	1850.16	38.7013	1869.77	22.448	1892.41	18.9654	1892.41	18.9654	97.7676
He9-JH16I3-May7-correct-Spot 144	447.849	181829	9.22903	8.61407	1.15369	5.4185	3.48665	0.338669	3.29025	0.94367	1880.26	53.661	1887.78	29.8957	1896.83	20.7455	1896.83	20.7455	99.1264
He9-JH16I3-May7-correct-Spot 92	187.483	17083.5	1.92532	8.55006	1.08832	5.67309	2.52348	0.351946	2.27673	0.902219	1943.89	38.2079	1927.28	21.7866	1910.24	19.5386	1910.24	19.5386	101.762
He9-JH16I3-May7-correct-Spot 175	92.0697	114292	1.07292	8.48337	1.11758	5.33752	2.51269	0.328546	2.25048	0.895644	1831.33	35.877	1874.89	21.4909	1924.28	20.0304	1924.28	20.0304	95.1694
He9-JH16I3-May7-correct-Spot 84	216.058	1.04665e+06	3.35989	8.40097	1.15012	5.66106	2.70483	0.345076	2.44813	0.905095	1911.04	40.488	1925.45	23.3454	1941.76	20.5712	1941.76	20.5712	98.4183
He9-JH16I3-May7-correct-Spot 76	43.983	13967.2	1.11855	8.38823	1.13634	5.53872	2.42468	0.337107	2.14192	0.883381	1872.74	34.8118	1906.63	20.8575	1944.47	20.3162	1944.47	20.3162	96.3109
He9-JH16I3-May7-correct-Spot 30	213.601	340081	5.35231	8.38625	1.00032	5.67781	2.31938	0.345491	2.09257	0.902213	1913.03	34.6385	1928	20.0265	1944.89	17.8869	1944.89	17.8869	98.3618
He9-JH16I3-May7-correct-Spot 49	254.318	75462.9	2.94573	8.36999	1.07913	5.4369	2.8945	0.33019	2.68582	0.927904	1839.3	42.9786	1890.69	24.8293	1948.36	19.2862	1948.36	19.2862	94.4026
He9-JH16I3-May7-correct-Spot 157	292.565	85555.4	8.37595	8.26331	1.11387	5.87201	2.81725	0.35207	2.5877	0.91852	1944.47	43.4378	1957.11	24.4479	1971.25	19.8538	1971.25	19.8538	98.6415
He9-JH16I3-May7-correct-Spot 132	475.399	22826.7	2.38468	8.23348	1.01936	4.91386	3.48122	0.293558	3.32864	0.956169	1659.29	48.6969	1804.64	29.3788	1977.7	18.1553	1977.7	18.1553	83.8999
He9-JH16I3-May7-correct-Spot 221	120.836	115353	1.54896	8.23015	1.28911	5.95211	2.46295	0.35544	2.09865	0.852087	1960.52	35.4771	1968.87	21.4143	1978.42	22.9566	1978.42	22.9566	99.0955
He9-JH16I3-May7-correct-Spot 55	117.977	46793.5	1.2748	8.09229	1.22934	6.22273	3.17375	0.365376	2.92599	0.921935	2007.61	50.4763	2007.65	27.7709	2008.45	21.8177	2008.45	21.8177	99.9581
He9-JH16I3-May7-correct-Spot 110	228.272	313350	3.16449	7.85263	0.933024	6.35316	2.17021	0.361987	1.95941	0.902866	1991.59	33.5712	2025.82	19.0414	2061.64	16.4573	2061.64	16.4573	96.602
He9-JH16I3-May7-correct-Spot 185	101.974	31891.2	3.20586	7.73387	1.10759	6.95819	2.94547	0.390464	2.72929	0.926607	2124.98	49.408	2106.11	26.1554	2088.48	19.4776	2088.48	19.4776	101.748
He9-JH16I3-May7-correct-Spot 149	328.943	851030	0.761345	7.29686	1.38384	7.84139	2.76366	0.415161	2.39223	0.865604	2238.48	45.2417	2212.97	24.8928	2190.18	24.0629	2190.18	24.0629	102.205
He9-JH16I3-May7-correct-Spot 209	582.327	97376.5	1.62908	7.13089	1.13736	7.37782	2.82582	0.381733	2.58683	0.915425	2084.37	46.0712	2158.29	25.2733	2230.09	19.6903	2230.09	19.6903	93.4657
He9-JH16I3-May7-correct-Spot 201	228.345	362657	3.24051	7.05895	1.19357	8.3533	3.01908	0.427845	2.77313	0.918535	2295.99	53.5678	2270.12	27.3844	2247.63	20.6245	2247.63	20.6245	102.152
He9-JH16I3-May7-correct-Spot 167	147.264	114499	1.04471	7.02173	1.01048	8.23169	2.88417	0.419393	2.70136	0.936617	2257.72	51.4551	2256.83	26.1188	2256.76	17.4431	2256.76	17.4431	100.042
He9-JH16I3-May7-correct-Spot 114	52.3822	30848.2	0.960402	6.67168	1.04426	8.7261	2.56085	0.422418	2.33826	0.91308	2271.45	44.7644	2309.81	23.333	2344.62	17.8593	2344.62	17.8593	96.879
He9-JH16I3-May7-correct-Spot 85	112.346	18278.3	1.71074	6.47681	1.39129	9.28627	2.7611	0.436406	2.38495	0.863768	2334.53	46.711	2366.67	25.3154	2395.19	23.671	2395.19	23.671	97.4676
He9-JH16I3-May7-correct-Spot 57	278.025	50225.1	2.01984	6.41725	1.03954	9.29389	2.49701	0.432747	2.27033	0.909221	2318.09	44.2057	2367.42	22.895	2410.9	17.6568	2410.9	17.6568	96.1505
He9-JH16I3-May7-correct-Spot 71	71.7923	22238.7	1.28768	6.22225	1.23728	10.6915	2.15139	0.482696	1.76001	0.818079	2539	36.9368	2496.69	19.979	2463.17	20.9049	2463.17	20.9049	103.078
He9-JH16I3-May7-correct-Spot 228	41.6945	23875.2	1.16474	6.21543	1.1402	10.021	3.02757	0.45193	2.80466	0.926373	2403.83	56.2775	2436.72	27.9591	2465.02	19.2608	2465.02	19.2608	97.5175
He9-JH16I3-May7-correct-Spot 284	256.451	62709.3	1.76773	6.15259	1.2081	10.0816	2.81688	0.450064	2.54467	0.903362	2395.54	50.9149	2442.28	26.0268	2482.17	20.3729	2482.17	20.3729	96.5097
He9-JH16I3-May7-correct-Spot 70	447.45	54299.9	1.94307	6.15239	1.15198	10.4104	2.73736	0.46473	2.48316	0.907137	2460.41	50.7897	2471.98	25.3641	2482.23	19.4262	2482.23	19.4262	99.121
He9-JH16I3-May7-correct-Spot 196	106.367	1.10441e+06	1.04346	6.12576	1.43606	10.3066	2.70285	0.458105	2.2898	0.847177	2431.19	46.3766	2462.7	25.0221	2489.54	24.1972	2489.54	24.1972	97.6561
He9-JH16I3-May7-correct-Spot 105	378.322	119162	1.06292	6.11351	1.1433	10.4308	2.66086	0.462698	2.40272	0.902984	2451.46	48.9973	2473.79	24.6592	2492.91	19.2591	2492.91	19.2591	98.3373
He9-JH16I3-May7-correct-Spot 46	646.65	336588	7.37896	6.10301	1.41126	9.33899	3.68496	0.413554	3.40401	0.923758	2231.15	64.2012	2371.86	33.81	2495.81	23.7672	2495.81	23.7672	89.3959
He9-JH16I3-May7-correct-Spot 73	77.5602	222901	1.72138	6.09539	1.32352	10.7233	3.0469	0.47426	2.74443	0.900729	2502.21	56.9147	2499.44	28.3061	2497.91	22.2846	2497.91	22.2846	100.172
He9-JH16I3-May7-correct-Spot 266	643.783	143461	1.35438	6.08483	1.01808	9.30754	2.89937	0.410933	2.71475	0.936323	2219.19	50.9708	2368.76	26.5897	2500.83	17.1358	2500.83	17.1358	88.7381
He9-JH16I3-May7-correct-Spot 236	55.4791	17078.1	0.740028	6.0753	1.19425	10.7545	3.08727	0.474075	2.84693	0.922151	2501.41	59.0248	2502.15	28.6884	2503.47	20.0964	2503.47	20.0964	99.9177
He9-JH16I3-May7-correct-Spot 222	16.1428	38378.8	1.45245	6.07321	1.18786	10.663	2.65673	0.469879	2.37638	0.894477	2483.03	48.9719	2494.21	24.6678	2504.05	19.9877	2504.05	19.9877	99.1606
He9-JH16I3-May7-correct-Spot 115	106.035	55048	0.667112	6.05737	1.04356	10.2047	2.86723	0.448511	2.67058	0.931414	2388.63	53.307	2453.51	26.5211	2508.44	17.5514	2508.44	17.5514	95.2237
He9-JH16I3-May7-correct-Spot 242	29.1268	17684.1	0.846181	6.01181	1.243	11.2081	3.25837	0.488904	3.01196	0.924378	2565.93	63.7586	2540.59	30.3839	2521.13	20.8803	2521.13	20.8803	101.777
He9-JH16I3-May7-correct-Spot 102	177.066	43972.8	2.7226	6.0013	1.25613	10.1897	2.89093	0.443704	2.60377	0.900669	2367.2	51.5876	2452.14	26.7369	2524.07	21.0948	2524.07	21.0948	93.7852
He9-JH16I3-May7-correct-Spot 35	182.305	206521	1.35936	5.98506	1.04644	10.7457	2.88852	0.466649	2.6923	0.932071	2468.85	55.2226	2501.38	26.8387	2528.62	17.5677	2528.62	17.5677	97.6363
He9-JH16I3-May7-correct-Spot 100	227.152	71697.2	2.67414	5.98009	1.2284	10.9876	2.63899	0.47676	2.33566	0.885058	2513.14	48.61	2522.09	24.5653	2530.01	20.6198	2530.01	20.6198	99.3332
He9-JH16I3-May7-correct-Spot 278	337.32	84987.7	0.641236	5.97282	1.27942	10.7719	2.94589	0.466833	2.65356	0.900766	2469.66	54.4426	2503.65	27.3778	2532.05	21.4689	2532.05	21.4689	97.5358
He9-JH16I3-May7-correct-Spot 212	150.721	104945	3.31254	5.96468	1.22145	10.0138	3.08989	0.433385	2.83822	0.91855	2320.96	55.3204	2436.06	28.5331	2534.34	20.4913	2534.34	20.4913	91.5804
He9-JH16I3-May7-correct-Spot 195	63.6253	900975	1.55579	5.95107	1.07597	10.9716	2.85828	0.473756	2.64803	0.926441	2500.01	54.8758	2520.73	26.6043	2538.17	18.0435	2538.17	18.0435	98.4965
He9-JH16I3-May7-correct-Spot 308	148.834	44391.7	2.38188	5.9491	1.29602	10.7742	2.37585	0.465077	1.99123	0.838112	2461.94	40.7483	2503.85	22.0786	2538.73	21.7334	2538.73	21.7334	96.9751
He9-JH16I3-May7-correct-Spot 60	250.782	356116	2.14093	5.93703	0.958766	10.1556	2.72605	0.437487	2.55188	0.936111	2339.38	50.0666	2449.05	25.2037	2542.13	16.0712	2542.13	16.0712	92.0243
He9-JH16I3-May7-correct-Spot 216	46.5043	30284.9	2.57976	5.80736	1.30128	11.5257	2.84302	0.485662	2.52773	0.889101	2551.88	53.2688	2566.67	26.5689	2579.08	21.7355	2579.08	21.7355	98.9454
He9-JH16I3-May7-correct-Spot 173	122.11	118446	3.51378	5.74858	1.17476	11.8893	2.61953	0.495911	2.34134	0.893802	2596.2	50.0367	2595.72	24.5394	2596.06	19.5894	2596.06	19.5894	100.005
He9-JH16I3-May7-correct-Spot 159	86.7278	30562.4	1.51992	5.65401	1.28662	11.253	2.61942	0.46165	2.28167	0.871056	2446.84	46.4566	2544.32	24.4312	2623.68	21.3981	2623.68	21.3981	93.2597
He9-JH16I3-May7-correct-Spot 31	880.95	37329.5	1.14159	5.55807	1.06167	11.2409	2.73438	0.453327	2.51986	0.921546	2410.03	50.67	2543.31	25.5016	2652.1	17.6085	2652.1	17.6085	90.8723
He9-JH16I3-May7-correct-Spot 277	182.236	40026.8	5.82016	4.62509	1.11682	17.2139	2.49135	0.577678	2.227	0.893893	2939.27	52.5673	2946.83	23.9123	2952.68	18.0253	2952.68	18.0253	99.5459
He9-JH16I3-May7-correct-Spot 38	154.72	76737.4	2.07642	4.03943	1.0152	21.6531	2.34947	0.634641	2.11882	0.901828	3167.92	53.0307	3168.3	22.8068	3169.22	16.0911	3169.22	16.0911	99.959
He9-JH16I3-May7-correct-Spot 295	182.209	709459	2.25061	3.18412	1.07799	28.3208	2.80277	0.65431	2.58718	0.923077	3245.02	65.9669	3430.27	27.495	3540.97	16.6119	3540.97	16.6119	91.6422
Notes: see Table S5a

## Sheet: S2-1
Table S5i. U-Pb geochronologic analyses.				JHPM16-S2-1
							Isotope ratios						Apparent ages (Ma)
Analysis	U	206Pb	U/Th	206Pb*	±	207Pb*	±	206Pb*	±	error	206Pb*	±	207Pb*	±	206Pb*	±	Best age	±	Conc
	(ppm)	204Pb		207Pb*	(%)	235U*	(%)	238U	(%)	corr.	238U*	(Ma)	235U	(Ma)	207Pb*	(Ma)	(Ma)	(Ma)	(%)
He JH16-S2-1-Spot 49	401.925	5188.48	2.0801	21.304	1.64067	0.0285507	2.7728	0.00441332	2.23531	0.806158	28.3875	0.633153	28.5837	0.781517	46.1742	39.2098	28.3875	0.633153	NA
He JH16-S2-1-Spot 69	224.69	4984.71	2.22492	18.9346	3.40048	0.0527279	3.77603	0.00724411	1.64169	0.434766	46.5302	0.76113	52.1752	1.92039	320.804	77.2793	46.5302	0.76113	NA
He JH16-S2-1-Spot 80	1775.76	17429.4	2.70603	15.4746	1.03461	0.227626	2.5026	0.0255581	2.27872	0.910543	162.688	3.66082	208.237	4.71172	762.034	21.8116	162.688	3.66082	NA
He JH16-S2-1-Spot 7	360.734	122355	2.10338	19.4055	1.13849	0.244723	2.15051	0.0344578	1.82443	0.848371	218.388	3.91761	222.28	4.29315	264.678	26.1113	218.388	3.91761	NA
He JH16-S2-1-Spot 78	90.976	8934.52	2.14525	19.6232	1.5178	0.258549	1.84258	0.036813	1.04469	0.566972	233.048	2.39115	233.497	3.84355	239.004	34.9992	233.048	2.39115	NA
He JH16-S2-1-Spot 11	78.745	14176.4	0.998123	19.5805	1.34442	0.26929	1.87854	0.0382588	1.31204	0.698435	242.031	3.11667	242.126	4.04681	244.032	30.973	242.031	3.11667	NA
He JH16-S2-1-Spot 27	1017.23	74082.9	17.5816	12.0901	0.765591	0.450131	4.70867	0.0394873	4.64602	0.986693	249.654	11.3773	377.371	14.842	1262.45	14.9576	249.654	11.3773	NA
He JH16-S2-1-Spot 43	713.958	3856.01	1.96327	12.4988	4.44324	0.438099	4.93415	0.0397309	2.14556	0.434839	251.165	5.28527	368.911	15.2637	1197.19	87.6707	251.165	5.28527	NA
He JH16-S2-1-Spot 105	37.865	3307.2	2.11066	20.8495	2.54187	0.262785	2.78406	0.0397544	1.13572	0.407936	251.31	2.79926	236.909	5.8828	97.4064	60.1763	251.31	2.79926	NA
He JH16-S2-1-Spot 18	303.575	112091	1.95344	19.1995	0.862871	0.317592	1.31203	0.0442432	0.988372	0.753315	279.081	2.6995	280.049	3.21118	289.147	19.7396	279.081	2.6995	NA
He JH16-S2-1-Spot 35	126.411	39003.5	2.79382	18.8511	1.07481	0.38046	1.6238	0.0520396	1.21717	0.749582	327.031	3.88125	327.376	4.54413	330.84	24.3985	327.031	3.88125	NA
He JH16-S2-1-Spot 87	540.614	41833	1.24694	16.1883	1.04935	0.472604	4.27494	0.0555119	4.14415	0.969405	348.273	14.05	392.986	13.9315	666.277	22.4557	348.273	14.05	NA
He JH16-S2-1-Spot 12	1730.26	12074.1	2.87447	14.2813	0.834669	0.563351	2.14441	0.0583759	1.9753	0.921141	365.741	7.02337	453.705	7.84637	928.993	17.1564	365.741	7.02337	NA
He JH16-S2-1-Spot 83	440.418	116923	3.45392	17.8412	0.785066	0.463663	1.91994	0.0600225	1.75209	0.912578	375.763	6.3955	386.802	6.17566	454.374	17.4415	375.763	6.3955	NA
He JH16-S2-1-Spot 82	606.665	18680.7	1.60063	16.1509	0.932082	0.524016	2.15514	0.0614085	1.94315	0.901637	384.186	7.24722	427.831	7.52434	671.193	19.9519	384.186	7.24722	NA
He JH16-S2-1-Spot 19	629.007	70484.5	4.81789	17.6906	0.858411	0.490208	1.68206	0.0629231	1.44654	0.859978	393.378	5.52022	405.053	5.61838	473.128	18.9911	393.378	5.52022	NA
He JH16-S2-1-Spot 55	174.789	22363.2	1.00638	15.7318	1.37068	0.557693	2.68209	0.0636594	2.3054	0.859552	397.842	8.89455	450.024	9.75058	727.181	29.04	397.842	8.89455	NA
He JH16-S2-1-Spot 23	603.66	4.48935e+06	1.69749	17.934	1.04414	0.534589	1.64963	0.0695642	1.27713	0.774192	433.53	5.35468	434.851	5.83512	442.799	23.2337	433.53	5.35468	97.9067
He JH16-S2-1-Spot 10	1148.65	157992	25.1091	17.5059	0.934076	0.547849	1.69045	0.0695879	1.40895	0.833473	433.672	5.90922	443.586	6.07533	496.282	20.5615	433.672	5.90922	87.3842
He JH16-S2-1-Spot 74	774.583	27849.5	1.82421	17.1312	1.32456	0.579713	1.66894	0.0720592	1.01533	0.608371	448.55	4.39943	464.277	6.21885	543.766	28.9521	448.55	4.39943	82.4895
He JH16-S2-1-Spot 103	98.8013	51201.3	1.84221	16.8682	1.03645	0.622552	2.84314	0.0761962	2.64749	0.931187	473.378	12.0836	491.446	11.077	577.484	22.5261	473.378	12.0836	81.9725
He JH16-S2-1-Spot 71	1520.32	78384.4	12.8564	17.6479	0.689178	0.598602	1.20015	0.0766515	0.982548	0.818686	476.105	4.50939	476.346	4.56318	478.452	15.2114	476.105	4.50939	99.5094
He JH16-S2-1-Spot 33	290.04	49805.8	52.7447	17.1202	1.11555	0.62864	1.71952	0.0780906	1.30855	0.760995	484.716	6.11014	495.248	6.73938	545.201	24.3984	484.716	6.11014	88.9059
He JH16-S2-1-Spot 31	138.892	17722.9	1.35044	17.0487	0.88104	0.644198	1.42096	0.0796891	1.11485	0.784577	494.267	5.30439	504.902	5.65303	554.323	19.2234	494.267	5.30439	89.1657
He JH16-S2-1-Spot 61	91.3207	65048.7	0.933647	16.5503	1.05028	0.731376	1.74062	0.0878281	1.38804	0.797443	542.679	7.22427	557.361	7.46604	618.701	22.6683	542.679	7.22427	87.7127
He JH16-S2-1-Spot 34	528.947	47693.3	1.26568	17.2771	0.85248	0.701104	1.33546	0.0878906	1.02797	0.769751	543.05	5.35371	539.45	5.58876	525.199	18.671	543.05	5.35371	103.399
He JH16-S2-1-Spot 5	290.796	44201.2	10.3739	16.416	0.918956	0.757417	1.45132	0.0902176	1.12332	0.773998	556.824	5.99236	572.519	6.35123	636.291	19.7868	556.824	5.99236	87.5109
He JH16-S2-1-Spot 101	208.288	28478.6	0.30007	16.7573	1.23464	0.745094	1.54602	0.090595	0.930509	0.601874	559.055	4.98287	565.374	6.70261	591.807	26.7692	559.055	4.98287	94.4658
He JH16-S2-1-Spot 64	149.269	14472.3	0.99267	17.034	0.750242	0.739521	1.39567	0.091402	1.17687	0.843232	563.823	6.35357	562.126	6.02473	556.233	16.3436	563.823	6.35357	101.365
He JH16-S2-1-Spot 107	432.403	69898.9	1.38671	16.2224	0.918878	0.783527	2.74171	0.0922264	2.58315	0.942166	568.691	14.0608	587.493	12.2306	661.738	19.6709	568.691	14.0608	85.939
He JH16-S2-1-Spot 47	716.741	53951.5	3.59451	16.5485	0.805291	0.773353	1.1698	0.0928589	0.848497	0.725332	572.423	4.64759	581.684	5.17999	618.932	17.4009	572.423	4.64759	92.4856
He JH16-S2-1-Spot 48	120.242	48439.4	1.80182	16.5164	1.00808	0.795445	1.70421	0.0953266	1.37408	0.806286	586.963	7.70904	594.256	7.66652	623.116	21.7624	586.963	7.70904	94.198
He JH16-S2-1-Spot 32	608	221255	5.02111	16.2103	0.781776	0.816954	1.40813	0.0960896	1.17118	0.831726	591.451	6.61869	606.348	6.42884	663.332	16.7282	591.451	6.61869	89.1637
He JH16-S2-1-Spot 50	128.789	38303	1.88011	16.2715	1.13391	0.815239	2.6501	0.0962498	2.39526	0.903839	592.394	13.557	605.389	12.0855	655.253	24.3053	592.394	13.557	90.4068
He JH16-S2-1-Spot 42	98.3614	133396	2.81967	16.2933	0.975374	0.867545	1.47611	0.102563	1.10794	0.750583	629.41	6.64387	634.234	6.96266	652.394	20.9261	629.41	6.64387	96.477
He JH16-S2-1-Spot 28	113.656	17168.2	1.04804	16.5465	1.06453	0.861475	1.30821	0.103428	0.760395	0.581247	634.465	4.59463	630.928	6.14751	619.192	22.992	634.465	4.59463	102.467
He JH16-S2-1-Spot 9	648.347	99093.7	2.62419	16.4941	0.870604	0.875816	1.33944	0.104816	1.01792	0.759956	642.572	6.22542	638.72	6.35012	626.037	18.7882	642.572	6.22542	102.641
He JH16-S2-1-Spot 29	447.555	72612.9	3.81004	16.1932	0.789123	0.911952	1.53074	0.10715	1.31166	0.85688	656.174	8.18325	658.095	7.4137	665.618	16.8879	656.174	8.18325	98.5812
He JH16-S2-1-Spot 85	389.981	68724	2.08755	14.9337	0.755408	1.01755	1.56952	0.110258	1.37577	0.876556	674.245	8.80743	712.68	8.03777	836.623	15.7184	674.245	8.80743	80.5913
He JH16-S2-1-Spot 40	136.21	23940.2	2.51008	15.9304	0.840076	0.970494	1.44932	0.112178	1.18101	0.814876	685.384	7.67903	688.718	7.248	700.528	17.8885	685.384	7.67903	97.8383
He JH16-S2-1-Spot 70	603.146	172750	3.55777	15.8993	0.791625	0.987651	1.24086	0.113938	0.955548	0.770067	695.578	6.30055	697.521	6.2607	704.713	16.8293	695.578	6.30055	98.7038
He JH16-S2-1-Spot 91	137.767	67826.6	0.848118	16.0156	0.783976	1.01443	1.30084	0.117884	1.03806	0.797992	718.372	7.05667	711.111	6.65168	689.203	16.7154	718.372	7.05667	104.232
He JH16-S2-1-Spot 79	62.3592	13938.4	3.14295	14.7389	1.23089	1.15387	3.65707	0.123398	3.4437	0.941656	750.093	24.3849	779.069	19.8955	863.926	25.5309	750.093	24.3849	86.8238
He JH16-S2-1-Spot 68	418.098	137179	1.76778	15.1608	0.789289	1.15979	1.41209	0.127582	1.1709	0.8292	774.055	8.54044	781.856	7.6996	805.079	16.5445	774.055	8.54044	96.1464
He JH16-S2-1-Spot 36	242.042	597435	14.7189	14.8114	1.03907	1.21548	1.76763	0.130627	1.42998	0.808982	791.44	10.6503	807.707	9.84725	853.736	21.575	791.44	10.6503	92.7031
He JH16-S2-1-Spot 8	272.192	16885.3	2.45313	14.3418	1.10242	1.26895	1.56991	0.132049	1.11772	0.711963	799.543	8.40466	831.921	8.91529	920.33	22.6716	799.543	8.40466	86.8757
He JH16-S2-1-Spot 81	740.457	97350.1	4.24386	14.5782	0.75688	1.26213	1.61102	0.133504	1.42215	0.882765	807.826	10.7978	828.866	9.12702	886.629	15.6299	807.826	10.7978	91.1121
He JH16-S2-1-Spot 39	25.4328	5722.42	3.47761	15.2012	1.55492	1.21358	1.86606	0.133855	1.0317	0.552876	809.82	7.85141	806.836	10.3883	799.503	32.6046	809.82	7.85141	101.29
He JH16-S2-1-Spot 2	553.019	105730	11.5904	14.8654	0.842158	1.24134	1.54176	0.133892	1.29143	0.837634	810.03	9.83042	819.49	8.67042	846.18	17.5175	810.03	9.83042	95.7279
He JH16-S2-1-Spot 72	256.484	57824.6	18.7105	14.5836	0.856539	1.26666	1.44935	0.134034	1.16917	0.806686	810.838	8.90813	830.897	8.22409	885.812	17.6945	810.838	8.90813	91.5361
He JH16-S2-1-Spot 20	363.237	92176.4	20.8507	14.5489	0.947863	1.29434	1.76338	0.136636	1.48697	0.843247	825.614	11.523	843.221	10.1014	890.782	19.5678	825.614	11.523	92.6842
He JH16-S2-1-Spot 56	253.637	46966	2.67845	14.5375	0.907175	1.35216	1.44568	0.142628	1.12563	0.778612	859.508	9.05762	868.491	8.43867	892.376	18.7329	859.508	9.05762	96.3168
He JH16-S2-1-Spot 37	356.538	541447	2.96472	14.332	1.27951	1.45141	1.72243	0.150933	1.15309	0.669457	906.189	9.74802	910.455	10.3552	921.73	26.3122	921.73	26.3122	98.314
He JH16-S2-1-Spot 21	1669.79	7.81596e+06	5.85553	14.0649	0.824521	1.40444	1.47339	0.143326	1.22109	0.828758	863.445	9.8678	890.812	8.73872	960.284	16.8375	960.284	16.8375	89.9156
He JH16-S2-1-Spot 30	434.025	75728.5	2.14957	14.0569	0.856955	1.53569	1.55303	0.156632	1.2952	0.833979	938.03	11.3068	944.778	9.55058	961.447	17.4926	961.447	17.4926	97.5644
He JH16-S2-1-Spot 95	616.698	261344	2.84223	14.0449	0.904189	1.48508	1.45464	0.151341	1.13948	0.783344	908.474	9.65559	924.307	8.82686	963.186	18.4856	963.186	18.4856	94.3198
He JH16-S2-1-Spot 54	22.6389	18993.8	1.6654	13.9111	1.52384	1.60168	1.92151	0.161669	1.17052	0.609165	966.044	10.5012	970.866	12.012	982.7	31.011	982.7	31.011	98.305
He JH16-S2-1-Spot 14	575.155	147320	4.9003	13.487	0.722424	1.53959	1.4106	0.150664	1.21157	0.858902	904.682	10.2265	946.34	8.68331	1045.45	14.5902	1045.45	14.5902	86.5353
He JH16-S2-1-Spot 99	190.217	66100.4	1.94219	13.4435	1.09787	1.43263	1.77107	0.139745	1.38975	0.784691	843.219	10.9845	902.65	10.5911	1051.96	22.1403	1051.96	22.1403	80.1569
He JH16-S2-1-Spot 94	402.301	61987.4	1.60147	13.1644	0.776417	1.90343	1.22908	0.181813	0.952794	0.775208	1076.87	9.44916	1082.29	8.18173	1094.1	15.5279	1094.1	15.5279	98.4249
He JH16-S2-1-Spot 53	430.584	24088.2	3.98977	12.7896	1.16212	1.9676	2.50169	0.182592	2.21539	0.885556	1081.12	22.0503	1104.49	16.8436	1151.66	23.0722	1151.66	23.0722	93.875
He JH16-S2-1-Spot 58	160.753	47639	2.9678	12.2434	0.969113	2.39198	1.31815	0.212495	0.893495	0.677842	1242.1	10.0944	1240.2	9.43867	1237.79	19.02	1237.79	19.02	100.348
He JH16-S2-1-Spot 59	363.44	215691	3.05133	10.5692	1.65625	2.78158	2.26598	0.213314	1.54644	0.68246	1246.45	17.5266	1350.6	16.9256	1520.4	31.2318	1520.4	31.2318	81.9819
He JH16-S2-1-Spot 46	30.3516	121461	1.78044	9.3685	0.915029	4.5299	1.25672	0.307926	0.861426	0.685459	1730.49	13.0738	1736.48	10.4533	1744.47	16.7624	1744.47	16.7624	99.1987
He JH16-S2-1-Spot 16	986.464	229806	3.86169	9.28073	0.869532	4.03253	1.48726	0.271548	1.20659	0.811283	1548.66	16.6109	1640.78	12.1012	1761.7	15.8965	1761.7	15.8965	87.9069
He JH16-S2-1-Spot 24	638.675	311802	9.16024	9.06308	1.2108	4.01572	4.02041	0.264075	3.83375	0.953572	1510.66	51.6305	1637.38	32.695	1804.96	22.0162	1804.96	22.0162	83.6945
He JH16-S2-1-Spot 67	1146.35	199319	1.63616	8.99813	0.823446	4.8128	1.27824	0.314223	0.977662	0.764852	1761.45	15.0687	1787.14	10.7466	1818.03	14.948	1818.03	14.948	96.8883
He JH16-S2-1-Spot 109	33.1859	14674.3	1.81081	6.18213	0.742881	10.3202	1.30388	0.46293	1.07156	0.821821	2452.48	21.8589	2463.92	12.0704	2474.09	12.5365	2474.09	12.5365	99.1268
He JH16-S2-1-Spot 65	191.913	4.01529e+06	1.54596	5.9491	0.602421	11.1491	1.18574	0.481261	1.0213	0.861324	2532.75	21.3906	2535.67	11.0492	2538.73	10.1031	2538.73	10.1031	99.7648
Notes: see Table S5a

## Sheet: M2
Table S5j. U-Pb geochronologic analyses.				JHPM16-M2
							Isotope ratios						Apparent ages (Ma)
Analysis	U	206Pb	U/Th	206Pb*	±	207Pb*	±	206Pb*	±	error	206Pb*	±	207Pb*	±	206Pb*	±	Best age	±	Conc
	(ppm)	204Pb		207Pb*	(%)	235U*	(%)	238U	(%)	corr.	238U*	(Ma)	235U	(Ma)	207Pb*	(Ma)	(Ma)	(Ma)	(%)
JHPM16-M2-Spot 77	257.105	10010.2	4.2641	19.9383	1.62633	0.249989	2.61601	0.0361657	2.04905	0.783271	229.022	4.61039	226.568	5.31238	202.195	37.7543	229.022	4.61039	NA
JHPM16-M2-Spot 111	94.5201	3490.4	2.1043	20.8158	4.54147	0.251762	4.66613	0.0380251	1.07138	0.229607	240.58	2.53001	228.006	9.52945	101.253	107.45	240.58	2.53001	NA
JHPM16-M2-Spot 90	201.769	6514.04	2.96585	19.5515	1.00889	0.311209	1.55062	0.0441491	1.17753	0.759392	278.5	3.20959	275.118	3.73696	247.464	23.2141	278.5	3.20959	NA
JHPM16-M2-Spot 94	143.044	44327.8	1.10199	17.8902	1.0193	0.549486	1.53207	0.0713277	1.14379	0.746568	444.15	4.90909	444.66	5.51671	448.245	22.6688	444.15	4.90909	99.0864
JHPM16-M2-Spot 263	44.8495	6744.38	0.443945	17.4522	1.52762	0.640313	1.82647	0.0810832	1.00118	0.548153	502.585	4.84064	502.5	7.2396	503.06	33.6149	502.585	4.84064	99.9056
JHPM16-M2-Spot 302	325.026	18263	2.21137	16.8558	0.959137	0.684754	1.70953	0.0837475	1.41511	0.827779	518.452	7.04941	529.644	7.05523	579.129	20.8199	518.452	7.04941	89.5228
JHPM16-M2-Spot 19	179.89	15181	1.57716	16.9608	1.50403	0.6892	1.98822	0.0848166	1.30035	0.654029	524.809	6.55396	532.32	8.23697	565.574	32.7336	524.809	6.55396	92.7922
JHPM16-M2-Spot 196	142.788	14158.9	1.91192	17.3331	1.14992	0.679857	1.84159	0.0855028	1.43846	0.781093	528.885	7.30407	526.688	7.56793	518.111	25.247	528.885	7.30407	102.08
JHPM16-M2-Spot 13	67.9623	22360.6	1.41936	16.7561	1.22564	0.715747	1.67622	0.08702	1.14347	0.68217	537.889	5.90096	548.153	7.10025	591.986	26.5734	537.889	5.90096	90.8617
JHPM16-M2-Spot 102	93.0982	6935.27	1.1196	16.441	1.41251	0.781529	1.79799	0.0932314	1.11246	0.618727	574.62	6.11582	586.355	8.009	633.014	30.4155	574.62	6.11582	90.7752
JHPM16-M2-Spot 82	65.2337	5978.01	1.87849	16.7219	1.46566	0.774249	1.86827	0.093941	1.15856	0.620126	578.803	6.41354	582.197	8.27836	596.427	31.7538	578.803	6.41354	97.045
JHPM16-M2-Spot 297	52.4972	261525	1.01067	16.5671	1.28886	0.79955	1.91216	0.0961124	1.41251	0.738699	591.586	7.98425	596.574	8.62672	616.505	27.8335	591.586	7.98425	95.958
JHPM16-M2-Spot 314	185.585	5902.87	2.94481	16.0955	1.47221	0.829845	1.93652	0.0969148	1.25806	0.64965	596.303	7.16534	613.526	8.91755	678.534	31.4625	596.303	7.16534	87.8811
JHPM16-M2-Spot 1	391.262	496414	1.43711	16.7324	1.0545	0.802387	1.82246	0.0974157	1.4864	0.815601	599.246	8.50572	598.174	8.2382	595.061	22.8374	599.246	8.50572	100.703
JHPM16-M2-Spot 114	158.047	21694.4	1.41671	16.6673	0.922631	0.808012	1.3842	0.0977171	1.03187	0.745466	601.017	5.92141	601.338	6.28132	603.472	19.9645	601.017	5.92141	99.5931
JHPM16-M2-Spot 168	56.0846	59333.6	1.63655	16.5479	1.38216	0.815153	1.69728	0.0978747	0.985076	0.580387	601.942	5.66116	605.341	7.73957	619.007	29.852	601.942	5.66116	97.243
JHPM16-M2-Spot 288	156.784	10381.3	3.02029	16.748	1.14741	0.812991	2.4258	0.0987953	2.13727	0.881061	607.345	12.3879	604.131	11.0457	593.054	24.8509	607.345	12.3879	102.41
JHPM16-M2-Spot 210	53.0745	10404.7	2.78014	16.4334	1.20034	0.833886	1.67108	0.099431	1.16262	0.695729	611.073	6.77812	615.766	7.71559	634.015	25.853	611.073	6.77812	96.3815
JHPM16-M2-Spot 108	147.924	12567.3	2.72579	16.0097	1.31597	0.856667	2.40751	0.0995139	2.01602	0.837387	611.559	11.7624	628.302	11.2796	689.985	28.0702	611.559	11.7624	88.6337
JHPM16-M2-Spot 283	200.769	65615.7	2.39128	16.4785	0.918985	0.832699	1.50459	0.0995623	1.19132	0.791793	611.843	6.9538	615.109	6.94146	628.067	19.8246	611.843	6.9538	97.4168
JHPM16-M2-Spot 249	33.7995	9824.18	1.9821	16.2206	0.970767	0.851405	1.43067	0.100206	1.05092	0.734564	615.613	6.1703	625.42	6.68053	661.966	20.7816	615.613	6.1703	92.9977
JHPM16-M2-Spot 79	25.9684	5628.82	1.63388	15.5312	1.61081	0.901327	1.97537	0.101572	1.1434	0.578831	623.616	6.79642	652.436	9.5086	754.333	34.002	623.616	6.79642	82.6711
JHPM16-M2-Spot 304	161.798	38725.1	3.87731	16.4882	1.0722	0.850811	2.32001	0.101787	2.05738	0.8868	624.875	12.2526	625.094	10.8295	626.805	23.1293	624.875	12.2526	99.6921
JHPM16-M2-Spot 21	262.014	28997.8	2.32887	16.4715	0.729543	0.851726	1.49234	0.101794	1.30187	0.872364	624.912	7.75363	625.596	6.96993	628.987	15.74	624.912	7.75363	99.3521
JHPM16-M2-Spot 239	211.841	328858	1.02181	16.3335	1.01562	0.863094	3.16686	0.102288	2.99959	0.94718	627.803	17.9436	631.81	14.8975	647.133	21.8255	627.803	17.9436	97.013
JHPM16-M2-Spot 258	342.034	13853.7	19.4153	16.3796	0.922898	0.888987	1.5869	0.105654	1.29094	0.813495	647.458	7.95226	645.825	7.58324	641.075	19.8536	647.458	7.95226	100.996
JHPM16-M2-Spot 87	193.231	83958.2	1.99141	16.0893	1.12455	0.922301	1.69432	0.107671	1.26733	0.747985	659.205	7.94133	663.576	8.25442	679.364	24.0293	659.205	7.94133	97.0327
JHPM16-M2-Spot 287	18.7831	17295.8	1.96343	15.4451	1.38457	0.968448	1.84863	0.108531	1.22491	0.662604	664.213	7.73088	687.664	9.23514	766.055	29.1506	664.213	7.73088	86.7057
JHPM16-M2-Spot 142	772.142	40132.3	5.42104	16.1441	1.00855	0.94326	1.52542	0.110493	1.14444	0.750246	675.609	7.34056	674.587	7.51844	672.129	21.5763	675.609	7.34056	100.518
JHPM16-M2-Spot 215	127.294	16165.5	3.19985	16.0486	1.23838	0.976193	1.64451	0.113674	1.08204	0.657971	694.05	7.11974	691.651	8.24862	684.806	26.4295	694.05	7.11974	101.35
JHPM16-M2-Spot 128	109.943	93720.1	0.766444	15.3445	1.0514	1.03654	1.55888	0.115406	1.15094	0.738312	704.067	7.67655	722.195	8.05648	779.807	22.1021	704.067	7.67655	90.2874
JHPM16-M2-Spot 22	33.0789	27739.8	0.502086	15.4269	1.3269	1.06771	1.70507	0.119514	1.07079	0.628004	727.768	7.36907	737.616	8.94016	768.533	27.9443	727.768	7.36907	94.6957
JHPM16-M2-Spot 171	305.744	21576	1.48178	15.4483	0.986816	1.07979	2.98766	0.121034	2.81998	0.943877	736.515	19.6271	743.532	15.7513	765.616	20.7923	736.515	19.6271	96.199
JHPM16-M2-Spot 184	191.96	23685.6	0.804329	15.6841	1.08669	1.06841	1.51507	0.121586	1.05572	0.696814	739.688	7.37766	737.959	7.94642	733.657	23.0059	739.688	7.37766	100.822
JHPM16-M2-Spot 28	175.229	15292.3	1.19726	15.5572	1.05701	1.08547	1.75429	0.122528	1.40009	0.798098	745.1	9.85178	746.301	9.27165	750.805	22.304	745.1	9.85178	99.2402
JHPM16-M2-Spot 68	284.903	9678.09	1.40978	15.2152	1.00501	1.1129	1.72717	0.122864	1.40466	0.813273	747.025	9.90801	759.571	9.23751	797.567	21.087	747.025	9.90801	93.663
JHPM16-M2-Spot 176	160.632	12330.6	0.903048	15.4906	1.1001	1.09693	1.80202	0.123292	1.42725	0.79203	749.483	10.0986	751.863	9.57185	759.85	23.1804	749.483	10.0986	98.6357
JHPM16-M2-Spot 165	88.0056	14363.6	0.963088	15.7129	1.20132	1.09433	1.69167	0.124765	1.19104	0.704062	757.933	8.51681	750.607	8.97555	729.778	25.4498	757.933	8.51681	103.858
JHPM16-M2-Spot 139	66.0097	13696.1	0.728699	15.2347	1.18046	1.13195	1.5782	0.125127	1.04749	0.663725	760.003	7.50961	768.682	8.5085	794.88	24.7753	760.003	7.50961	95.6123
JHPM16-M2-Spot 271	345.635	101680	1.44924	14.645	0.897721	1.18009	1.92204	0.125399	1.69951	0.884222	761.565	12.2076	791.357	10.5645	877.163	18.586	761.565	12.2076	86.8214
JHPM16-M2-Spot 197	216.058	8626.94	0.708167	15.5844	1.00441	1.11079	1.86276	0.125606	1.56877	0.842175	762.75	11.285	758.555	9.95379	747.113	21.2263	762.75	11.285	102.093
JHPM16-M2-Spot 286	173.537	32140.2	1.59263	15.1961	0.856035	1.14298	1.36848	0.126026	1.06768	0.780195	765.154	7.70323	773.925	7.41137	800.204	17.9556	765.154	7.70323	95.6199
JHPM16-M2-Spot 214	47.5938	17347.8	1.42248	15.4524	1.31334	1.12699	1.90471	0.126358	1.37951	0.724263	767.058	9.97634	766.317	10.2477	765.057	27.6538	767.058	9.97634	100.262
JHPM16-M2-Spot 244	43.3733	123284	2.14806	15.0539	0.968322	1.15691	1.55426	0.126367	1.21576	0.782211	767.109	8.79265	780.5	8.46505	819.914	20.2256	767.109	8.79265	93.5597
[truncated: 218 more rows]

[truncated: 2 more sheets: F-10, S4]
